# Supplementary material for: The PUF binding landscape in metazoan germ cells
Source: PubMed Central journal article supplement (PMC4911911; doi:10.1261/rna.055871.116), 2016-07
Supplement: supp_055871.116_Supplemental_Fig_S3.pdf [file supp_055871.116_Supplemental_Fig_S3.pdf]

|                                       | Mean mitotic region length (DAPI) | Mean total $\alpha$ -PH3 (+) cells |
|---------------------------------------|-----------------------------------|------------------------------------|
| <b>N2 wild-type</b><br>n=50 germlines | 19.2 $\pm$ 2.0                    | 5.8 $\pm$ 2.4                      |
| <b>FBF-1 transgene</b><br>n=50        | 19.8 $\pm$ 2.5                    | 4.4 $\pm$ 1.4                      |
| <b>FBF-2 transgene</b><br>n=50        | 20.8 $\pm$ 1.8                    | 5.3 $\pm$ 2.8                      |
