# Supplementary material for: The PUF binding landscape in metazoan germ cells
Source: PubMed Central journal article supplement (PMC4911911; doi:10.1261/rna.055871.116), 2016-07
Supplement: supp_055871.116_Supplemental_Fig_S4.pdf [file supp_055871.116_Supplemental_Fig_S4.pdf]

| <b>FBF-1 IP-MS</b>                                      |                                                   |
|---------------------------------------------------------|---------------------------------------------------|
| <b>Detected Peptide</b>                                 | <b>Specificity<br/>(* denotes FBF-1 or FBF-2)</b> |
| MIETLAHLR                                               | FBF-1 only                                        |
| TSSFIQSDTDSSRLEPDDFSQNVR                                | FBF-1 only                                        |
| SFQSFNVFMPVSR                                           | *                                                 |
| SNNVLPTWLSLDSNGEMR                                      | *                                                 |
| HQQNHIVTSRPPTPLDLMSLR                                   | *                                                 |
|                                                         |                                                   |
| <b>FBF-2 IP-MS</b>                                      |                                                   |
| <b>Detected Peptide</b>                                 | <b>Specificity</b>                                |
| CFSADIDR                                                | FBF-2 only                                        |
| CFSADIDRSK                                              | FBF-2 only                                        |
| EGGYDHAI SFQDWLK                                        | FBF-2 only                                        |
| KMIETLANLR                                              | FBF-2 only                                        |
| MIETLANLR                                               | FBF-2 only                                        |
| TSQKPPSTGIDSYPTPAQSPMAQHET<br>PMWDFNSLNPYFSMLNMNDGINYAR | FBF-2 only                                        |
| TSSFIQSDTDSSRLESDDFSQNVR                                | FBF-2 only                                        |
| VVQTIIEKLTADSMNVDLTSAAQNLR                              | FBF-2 only                                        |
| AVKGSLSYQK                                              | *                                                 |
| FASHVVEK                                                | *                                                 |
| FAVDKTGCQFLEK                                           | *                                                 |
| FQLFEQVIGR                                              | *                                                 |
| HQQNHIVTSRPPTPLDLMSLR                                   | *                                                 |
| LIAICVDQNaNHVIQK                                        | *                                                 |
| LMTSVTNR                                                | *                                                 |
| LSLSEVLDSGDLMK                                          | *                                                 |
| LVQALPR                                                 | *                                                 |
| NFISSQMTDMCLDKFACR                                      | *                                                 |
| SFQSFNVFMPVSR                                           | *                                                 |
| SNNVLPTWLSLDSNGEMR                                      | *                                                 |
| TSSFIQSDTDSSR                                           | *                                                 |
| VIQSSLQNMDSLACK                                         | *                                                 |
| VVAVIPLKNWEFIVDFVATPEHLR                                | *                                                 |
| VVQTIIEK                                                | *                                                 |
| YSRPALSR                                                | *                                                 |
