# Supplementary material for: The PUF binding landscape in metazoan germ cells
Source: PubMed Central journal article supplement (PMC4911911; doi:10.1261/rna.055871.116), 2016-07
Supplement: supp_055871.116_Supplemental_Fig_S6.pdf [file supp_055871.116_Supplemental_Fig_S6.pdf]

|                    | Dataset by Replicate | Total Reads | Total Unique Mapped Reads (%) |
|--------------------|----------------------|-------------|-------------------------------|
|                    | FBF-1 Rep 1          | 14,135,062  | 9,792,191 (69)                |
|                    | FBF-1 Rep 2          | 5,087,495   | 3,166,675 (62)                |
|                    | FBF-1 Rep 3          | 15,000,000  | 10,408,265 (69)               |
|                    | FBF-2 Rep 1          | 918,781     | 884,888 (96)                  |
|                    | FBF-2 Rep 2          | 7,999,348   | 7,680,463 (96)                |
|                    | FBF-2 Rep 3          | 5,829,028   | 5,584,323 (96)                |
| Controls for FBF-1 | N2 Rep 1             | 12,006,472  | 7,056,334 (59)                |
|                    | N2 Rep 2             | 4,424,378   | 2,476,303 (56)                |
|                    | N2 Rep 3             | 126,455     | 63,639 (50)                   |
| Controls for FBF-2 | N2 Rep 4             | 894,145     | 852,085 (95)                  |
|                    | N2 Rep 5             | 189,420     | 180,135 (95)                  |
|                    | N2 Rep 6             | 62,701      | 59,780 (95)                   |
