# Supplementary material for: The PUF binding landscape in metazoan germ cells
Source: PubMed Central journal article supplement (PMC4911911; doi:10.1261/rna.055871.116), 2016-07
Supplement: supp_055871.116_Supplemental_Fig_S7.pdf [file supp_055871.116_Supplemental_Fig_S7.pdf]

| <b>Gene</b>   | <b>Biological function</b> | <b>Key Reference</b>      |
|---------------|----------------------------|---------------------------|
| <i>fbf-1</i>  | GSC Self-renewal           | Lamont et al, 2004        |
| <i>fbf-2</i>  | GSC Self-renewal           | Lamont et al, 2004        |
| <i>fem-3</i>  | spermatogenesis            | Zhang et al, 1997         |
| <i>fog-1</i>  | spermatogenesis            | Thompson et al, 2005      |
| <i>fog-3</i>  | spermatogenesis            | Thompson et al, 2005      |
| <i>gld-1</i>  | meiosis                    | Crittenden et al, 2002    |
| <i>gld-3S</i> | meiosis                    | Eckmann et al, 2004       |
| <i>him-3</i>  | meiosis                    | Merritt and Seydoux, 2010 |
| <i>htp-1</i>  | meiosis                    | Merritt and Seydoux, 2010 |
| <i>htp-2</i>  | meiosis                    | Merritt and Seydoux, 2010 |
| <i>syp-2</i>  | meiosis                    | Merritt and Seydoux, 2010 |
| <i>syp-3</i>  | meiosis                    | Merritt and Seydoux, 2010 |
| <i>lip-1</i>  | inhibitor of Ras/MAPK      | Lee et al, 2006           |
| <i>mpk-1</i>  | Ras/MAPK signaling         | Lee et al, 2007           |
| <i>egl-4</i>  | chemosensation             | Kaye et al, 2009          |
