# Supplementary material for: The PUF binding landscape in metazoan germ cells
Source: PubMed Central journal article supplement (PMC4911911; doi:10.1261/rna.055871.116), 2016-07

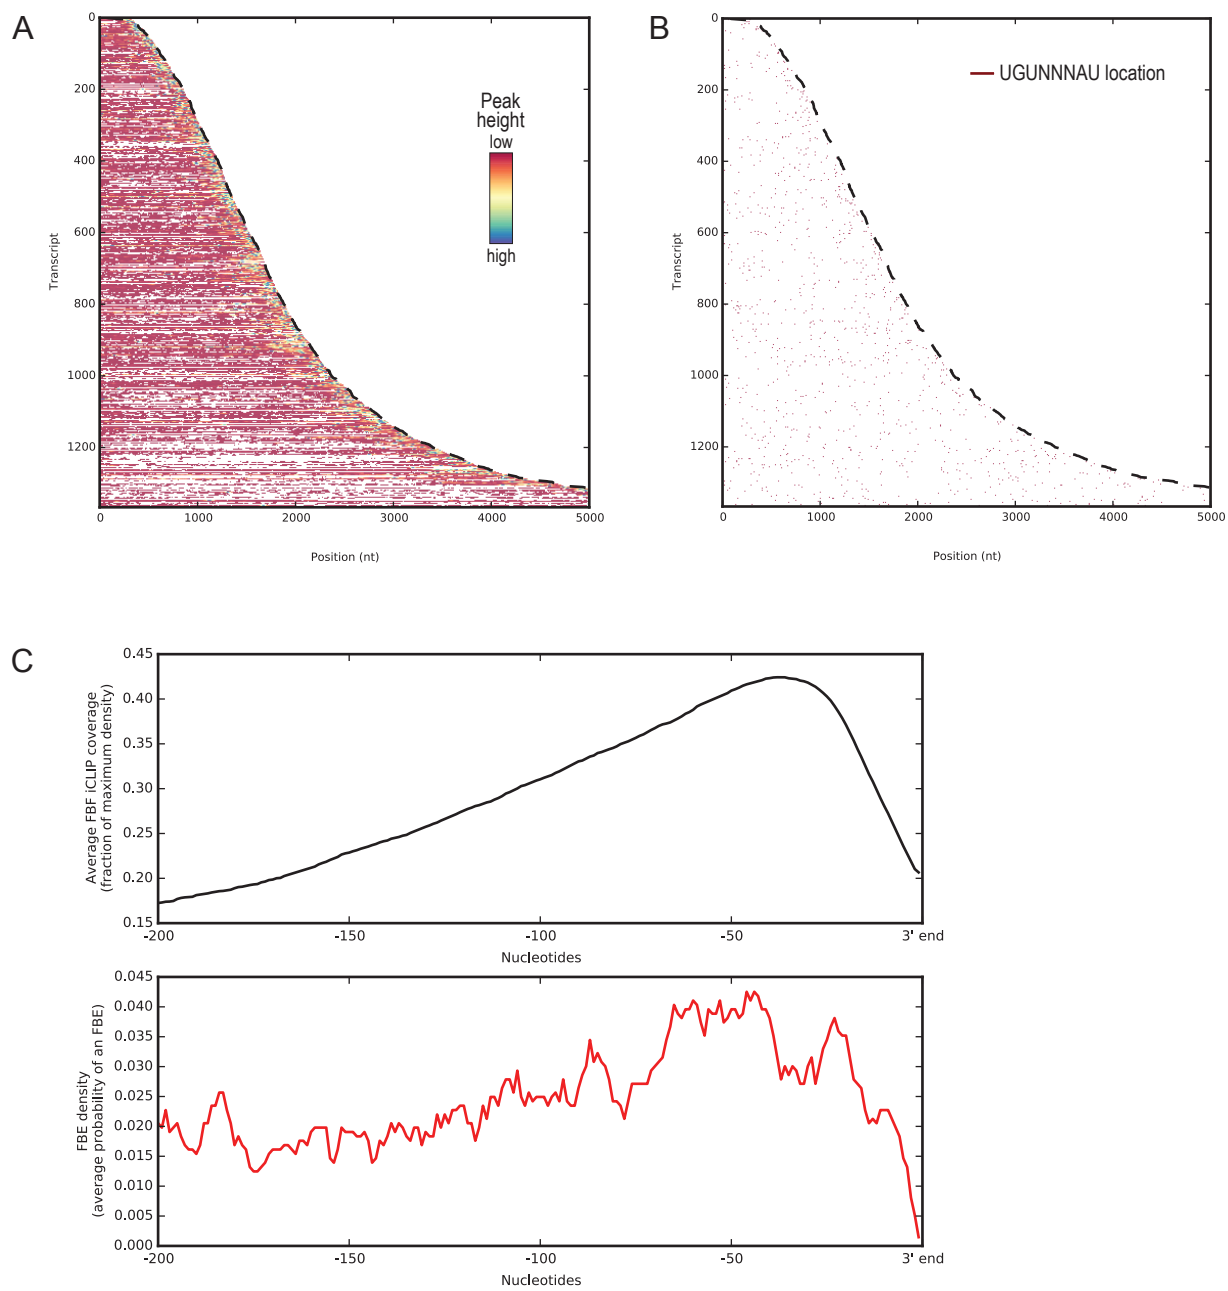

Supplement: supp_055871.116_Supplemental_Fig_S9.pdf [file supp_055871.116_Supplemental_Fig_S9.pdf]
