# Supplementary material for: The PUF binding landscape in metazoan germ cells
Source: PubMed Central journal article supplement (PMC4911911; doi:10.1261/rna.055871.116), 2016-07
Supplement: supp_055871.116_Supplemental_Fig_S12.pdf [file supp_055871.116_Supplemental_Fig_S12.pdf]

**FBF Targets: Gene Ontology Functional Enrichment Analysis**

**A**

| Biological Process            | Number of Genes | Bonferroni <i>P</i> value |
|-------------------------------|-----------------|---------------------------|
| Cell cycle                    | 138             | 3.1 x10 <sup>-57</sup>    |
| Cell cycle process            | 127             | 1.0 x10 <sup>-62</sup>    |
| Cell cycle phase              | 110             | 5.0 x10 <sup>-48</sup>    |
| M phase                       | 108             | 9.7 x10 <sup>-47</sup>    |
| Embryonic development         | 415             | 1.4 x10 <sup>-43</sup>    |
| Meiotic cell cycle            | 79              | 9.1 x10 <sup>-36</sup>    |
| Meiosis                       | 76              | 1.9 x10 <sup>-34</sup>    |
| M phase of meiotic cell cycle | 76              | 3.3 x10 <sup>-34</sup>    |
| Chromosome segregation        | 71              | 4.4 x10 <sup>-32</sup>    |
| Cell division                 | 74              | 2.9 x10 <sup>-26</sup>    |

**B**

| Cell Component                               | Number of Genes | Bonferroni <i>P</i> value |
|----------------------------------------------|-----------------|---------------------------|
| Chromosome                                   | 37              | 2.9 x10 <sup>-21</sup>    |
| Intracellular non-membrane bounded organelle | 75              | 2.9 x10 <sup>-20</sup>    |
| Non-membrane bounded organelle               | 75              | 2.9 x10 <sup>-20</sup>    |
| Microtubule cytoskeleton                     | 24              | 5.0 x10 <sup>-12</sup>    |
| Cytoskeletal part                            | 27              | 1.3 x10 <sup>-10</sup>    |
| Chromosomal part                             | 21              | 5.0 x10 <sup>-10</sup>    |
| Cytoskeleton                                 | 33              | 3.2 x10 <sup>-8</sup>     |
| Microtubule                                  | 16              | 2.5 x10 <sup>-7</sup>     |
| Centrosome                                   | 9               | 7.7 x10 <sup>-7</sup>     |
| Chromatin                                    | 14              | 3.9 x10 <sup>-6</sup>     |

**C**

| Molecular Function            | Number of Genes | Bonferroni <i>P</i> value |
|-------------------------------|-----------------|---------------------------|
| ATP Binding                   | 118             | 3.5 x10 <sup>-7</sup>     |
| Adenyl ribonucleotide binding | 118             | 2.0 x10 <sup>-7</sup>     |
| Purine ribonucleotide binding | 132             | 4.8 x10 <sup>-7</sup>     |
| Ribonucleotide binding        | 132             | 4.8 x10 <sup>-7</sup>     |
| Nucleoside binding            | 120             | 2.4 x10 <sup>-6</sup>     |
| Adenyl nucleotide binding     | 119             | 2.4 x10 <sup>-6</sup>     |
| Purine nucleoside binding     | 119             | 2.1 x10 <sup>-6</sup>     |
| Nucleotide binding            | 150             | 1.8 x10 <sup>-6</sup>     |
| Helicase activity             | 24              | 3.5 x10 <sup>-6</sup>     |
| RNA binding                   | 38              | 2.1 x10 <sup>-4</sup>     |
