# Supplementary material for: The PUF binding landscape in metazoan germ cells
Source: RNA. 2016 Jul;22(7):1026–43. doi: 10.1261/rna.055871.116 (PMC4911911; doi:10.1261/rna.055871.116)
Supplement: Supplemental Material [file supp_055871.116_Supplemental_Table_S1.xlsx]

## Sheet: tab 1 - IP MS of FBF-1 vs N2
Sample (Scroll down for N2 control)	Protein name	Protein MW (Da)	Unique peptides	Unique spectra	Percent sequence coverage	Peptide sequence	Best Mascot Ion score	Calculated +1H Peptide Mass (AMU)
3xFLAG::FBF-1 IP	Protein F40A3.6 [Caenorhabditis elegans]	30245.2	5	7	0.31	GNSSFDRDIVPGGAHTK	23.8	1757.86
3xFLAG::FBF-1 IP	Protein F40A3.6 [Caenorhabditis elegans]	30245.2	5	7	0.31	IIGSNFVQLTSRPK	69.6	1559.89
3xFLAG::FBF-1 IP	Protein F40A3.6 [Caenorhabditis elegans]	30245.2	5	7	0.31	SFQVYEPK	38.5	997.499
3xFLAG::FBF-1 IP	Protein F40A3.6 [Caenorhabditis elegans]	30245.2	5	7	0.31	SSSEYFAASYEAERER	23.1	1881.82
3xFLAG::FBF-1 IP	Protein F40A3.6 [Caenorhabditis elegans]	30245.2	5	7	0.31	TLIDYKDFDSSPLSPYLYQSHPYVR	48.9	3005.46
3xFLAG::FBF-1 IP	Protein LAM-2 [Caenorhabditis elegans]	181211	10	10	0.0955	AASEVWEAVKQK	62.8	1345.71
3xFLAG::FBF-1 IP	Protein LAM-2 [Caenorhabditis elegans]	181211	10	10	0.0955	CFNVINLEQEGQK	34.5	1578.76
3xFLAG::FBF-1 IP	Protein LAM-2 [Caenorhabditis elegans]	181211	10	10	0.0955	FCVQSGHTGQR	25.5	1276.59
3xFLAG::FBF-1 IP	Protein LAM-2 [Caenorhabditis elegans]	181211	10	10	0.0955	FRVHADPYFGWYPR	28.2	1810.88
3xFLAG::FBF-1 IP	Protein LAM-2 [Caenorhabditis elegans]	181211	10	10	0.0955	GTYSYKDIGYLSNVNLGTAGVAPSAANPK	21.4	2928.47
3xFLAG::FBF-1 IP	Protein LAM-2 [Caenorhabditis elegans]	181211	10	10	0.0955	KCIFNTHGFNCENCKPGYWGDALIEPK	28.9	3257.45
3xFLAG::FBF-1 IP	Protein LAM-2 [Caenorhabditis elegans]	181211	10	10	0.0955	MNTFGDEVFKDPQVLR	38	1895.93
3xFLAG::FBF-1 IP	Protein LAM-2 [Caenorhabditis elegans]	181211	10	10	0.0955	SFDITYVR	39.8	1000.51
3xFLAG::FBF-1 IP	Protein LAM-2 [Caenorhabditis elegans]	181211	10	10	0.0955	SSYNQDLVFTLK	52.5	1414.72
3xFLAG::FBF-1 IP	Protein LAM-2 [Caenorhabditis elegans]	181211	10	10	0.0955	SYYYAISDFAVGGR	70.1	1568.74
3xFLAG::FBF-1 IP	Protein CAP-1 [Caenorhabditis elegans]	32181.2	2	2	0.11	IASDFIKHAPPGEFNEVFNSVR	27.4	2475.23
3xFLAG::FBF-1 IP	Protein CAP-1 [Caenorhabditis elegans]	32181.2	2	2	0.11	SGTGVVFAR	38.7	893.484
3xFLAG::FBF-1 IP	Protein FBF-1 [Caenorhabditis elegans]	70359.3	2	3	0.14	HQQNHIVTSRPPTPLTDLMSLR	38.1	2541.34
3xFLAG::FBF-1 IP	Protein FBF-1 [Caenorhabditis elegans]	70359.3	2	3	0.14	MIETLAHLR	50.8	1083.6
3xFLAG::FBF-1 IP	Protein FBF-1 [Caenorhabditis elegans]	70359.3	2	3	0.14	SFQSFPNVFMPVSR	49	1642.8
3xFLAG::FBF-1 IP	Protein FBF-1 [Caenorhabditis elegans]	70359.3	2	3	0.14	SNNVLPTWSLDSNGEMR	47.2	1920.88
3xFLAG::FBF-1 IP	Protein FBF-1 [Caenorhabditis elegans]	70359.3	2	3	0.14	TSSFIQSDTDSSRLEPDDFSQNVR	53.8	2731.24
3xFLAG::FBF-1 IP	Protein IFB-1, isoform b [Caenorhabditis elegans]	67150	1	1	0.039	MVTEMGSATVGGISPALSANAAK	46	2163.08
3xFLAG::FBF-1 IP	Protein DIM-1, isoform a [Caenorhabditis elegans]	71851.8	1	1	0.0172	MNPQVTWISPK	51.3	1300.67
3xFLAG::FBF-1 IP	Protein MIG-6, isoform a [Caenorhabditis elegans]	169598	39	53	0.323	AACQNHKDACQLPK	39.2	1640.76
3xFLAG::FBF-1 IP	Protein MIG-6, isoform a [Caenorhabditis elegans]	169598	39	53	0.323	CELVCKPESGNFYYK	29	1893.85
3xFLAG::FBF-1 IP	Protein MIG-6, isoform a [Caenorhabditis elegans]	169598	39	53	0.323	CFFVHGAQPSAARQEQAQPAAQPAQPAQPSNIVSPPQQSASPVVVPSNSK	32.1	5193.54
3xFLAG::FBF-1 IP	Protein MIG-6, isoform a [Caenorhabditis elegans]	169598	39	53	0.323	CNQFWYGGCGGNDNNFASQDMCETICVEPPGKGR	69.8	3926.57
3xFLAG::FBF-1 IP	Protein MIG-6, isoform a [Caenorhabditis elegans]	169598	39	53	0.323	DACHLNVDQGR	51.2	1284.58
3xFLAG::FBF-1 IP	Protein MIG-6, isoform a [Caenorhabditis elegans]	169598	39	53	0.323	FACPEWQAGPWSACSEK	62.5	2010.85
3xFLAG::FBF-1 IP	Protein MIG-6, isoform a [Caenorhabditis elegans]	169598	39	53	0.323	FACPEWQAGPWSACSEKCGDAFQYR	33.4	3008.26
3xFLAG::FBF-1 IP	Protein MIG-6, isoform a [Caenorhabditis elegans]	169598	39	53	0.323	FATIEECQAR	61.9	1224.57
3xFLAG::FBF-1 IP	Protein MIG-6, isoform a [Caenorhabditis elegans]	169598	39	53	0.323	FATIEECQARCPSK	28.8	1696.78
3xFLAG::FBF-1 IP	Protein MIG-6, isoform a [Caenorhabditis elegans]	169598	39	53	0.323	FGCCPDGKTTAK	31.4	1341.59
3xFLAG::FBF-1 IP	Protein MIG-6, isoform a [Caenorhabditis elegans]	169598	39	53	0.323	GAGFYGCPESCAQSQFGCCPDGK	61.4	2539.97
3xFLAG::FBF-1 IP	Protein MIG-6, isoform a [Caenorhabditis elegans]	169598	39	53	0.323	GAGFYGCPESCAQSQFGCCPDGKTR	59.3	2797.12
3xFLAG::FBF-1 IP	Protein MIG-6, isoform a [Caenorhabditis elegans]	169598	39	53	0.323	GANLEGCGEPSCAASLYGCCK	61.5	2261.89
3xFLAG::FBF-1 IP	Protein MIG-6, isoform a [Caenorhabditis elegans]	169598	39	53	0.323	GANLEGCGEPSCAASLYGCCKDR	31.5	2532.04
3xFLAG::FBF-1 IP	Protein MIG-6, isoform a [Caenorhabditis elegans]	169598	39	53	0.323	GSHNEGCGCEFAQYGCCPDGKSVAK	74.2	2775.1
3xFLAG::FBF-1 IP	Protein MIG-6, isoform a [Caenorhabditis elegans]	169598	39	53	0.323	HCVAFWWR	32.1	1161.54
3xFLAG::FBF-1 IP	Protein MIG-6, isoform a [Caenorhabditis elegans]	169598	39	53	0.323	HGCCPDGETK	27.8	1160.45
3xFLAG::FBF-1 IP	Protein MIG-6, isoform a [Caenorhabditis elegans]	169598	39	53	0.323	HSYYYYNTASHQCETFTYGGCLGNTNR	24.5	3264.35
3xFLAG::FBF-1 IP	Protein MIG-6, isoform a [Caenorhabditis elegans]	169598	39	53	0.323	KHCVAFWWR	34	1289.64
3xFLAG::FBF-1 IP	Protein MIG-6, isoform a [Caenorhabditis elegans]	169598	39	53	0.323	KTIAFGPHYSGCER	37.3	1622.77
3xFLAG::FBF-1 IP	Protein MIG-6, isoform a [Caenorhabditis elegans]	169598	39	53	0.323	LAWHYDTTEGR	30.9	1348.63
3xFLAG::FBF-1 IP	Protein MIG-6, isoform a [Caenorhabditis elegans]	169598	39	53	0.323	LGSSLKFDK	48.5	994.557
3xFLAG::FBF-1 IP	Protein MIG-6, isoform a [Caenorhabditis elegans]	169598	39	53	0.323	NLYCIDGK	31	982.466
3xFLAG::FBF-1 IP	Protein MIG-6, isoform a [Caenorhabditis elegans]	169598	39	53	0.323	NLYCIDGKNK	24.9	1224.6
3xFLAG::FBF-1 IP	Protein MIG-6, isoform a [Caenorhabditis elegans]	169598	39	53	0.323	QCSGDCTGASVR	43	1297.53
3xFLAG::FBF-1 IP	Protein MIG-6, isoform a [Caenorhabditis elegans]	169598	39	53	0.323	QDAGPCETYSDQWFYNAFSQECETFTYGGCGGNLNRFR	36.3	4775.72
3xFLAG::FBF-1 IP	Protein MIG-6, isoform a [Caenorhabditis elegans]	169598	39	53	0.323	QRDACHLNVDQGR	23.6	1568.73
3xFLAG::FBF-1 IP	Protein MIG-6, isoform a [Caenorhabditis elegans]	169598	39	53	0.323	QSMEDICR	72.7	1038.43
3xFLAG::FBF-1 IP	Protein MIG-6, isoform a [Caenorhabditis elegans]	169598	39	53	0.323	RQCSGDCTGASVR	66.6	1453.63
3xFLAG::FBF-1 IP	Protein MIG-6, isoform a [Caenorhabditis elegans]	169598	39	53	0.323	SCGGGVQLEK	45	1034.49
3xFLAG::FBF-1 IP	Protein MIG-6, isoform a [Caenorhabditis elegans]	169598	39	53	0.323	SCGGGVQLEKR	55.2	1190.59
3xFLAG::FBF-1 IP	Protein MIG-6, isoform a [Caenorhabditis elegans]	169598	39	53	0.323	SNDICVDGECLPVGCDGKLGSSLK	23.3	2581.16
3xFLAG::FBF-1 IP	Protein MIG-6, isoform a [Caenorhabditis elegans]	169598	39	53	0.323	SVAKGAGFYGCPESCAQSQFGCCPDGK	49.3	2925.21
3xFLAG::FBF-1 IP	Protein MIG-6, isoform a [Caenorhabditis elegans]	169598	39	53	0.323	VDGPLRCDQLQPR	37.5	1553.79
3xFLAG::FBF-1 IP	Protein MIG-6, isoform a [Caenorhabditis elegans]	169598	39	53	0.323	VVYCHQVFANGR	44	1450.69
3xFLAG::FBF-1 IP	Protein MIG-6, isoform a [Caenorhabditis elegans]	169598	39	53	0.323	YGCCPDGETTALGPR	66.2	1653.7
3xFLAG::FBF-1 IP	Protein MIG-6, isoform a [Caenorhabditis elegans]	169598	39	53	0.323	YGCCPDGETTALGPRNDGCDNCR	48.4	2645.02
3xFLAG::FBF-1 IP	Protein MIG-6, isoform a [Caenorhabditis elegans]	169598	39	53	0.323	YISCNLNACESGTDFRAEQCSK	25	2610.1
3xFLAG::FBF-1 IP	Protein MIG-6, isoform a [Caenorhabditis elegans]	169598	39	53	0.323	YYYDHSKK	26.4	1103.52
3xFLAG::FBF-1 IP	Protein UNC-87, isoform b [Caenorhabditis elegans]	41576.2	28	55	0.709	FASQAGMIGFGTCR	79.4	1502.69
3xFLAG::FBF-1 IP	Protein UNC-87, isoform b [Caenorhabditis elegans]	41576.2	28	55	0.709	FASQAGMIGFGTCRNTTFEAEGGELPYEAMK	59.8	3372.49
3xFLAG::FBF-1 IP	Protein UNC-87, isoform b [Caenorhabditis elegans]	41576.2	28	55	0.709	GMTGFGQPR	67.4	950.451
3xFLAG::FBF-1 IP	Protein UNC-87, isoform b [Caenorhabditis elegans]	41576.2	28	55	0.709	GMTGFGQPRWEVLDPSISWQNR	37.5	2561.24
3xFLAG::FBF-1 IP	Protein UNC-87, isoform b [Caenorhabditis elegans]	41576.2	28	55	0.709	GMTGFGTAR	48.5	897.425
3xFLAG::FBF-1 IP	Protein UNC-87, isoform b [Caenorhabditis elegans]	41576.2	28	55	0.709	IRMSEGIVR	34.3	1060.59
3xFLAG::FBF-1 IP	Protein UNC-87, isoform b [Caenorhabditis elegans]	41576.2	28	55	0.709	IWELEYPEEAEISLDRL	77.6	2105.04
3xFLAG::FBF-1 IP	Protein UNC-87, isoform b [Caenorhabditis elegans]	41576.2	28	55	0.709	KMTSFGAPR	57.7	994.514
3xFLAG::FBF-1 IP	Protein UNC-87, isoform b [Caenorhabditis elegans]	41576.2	28	55	0.709	LMTNFGTPR	57.5	1052.52
3xFLAG::FBF-1 IP	Protein UNC-87, isoform b [Caenorhabditis elegans]	41576.2	28	55	0.709	LQSGTNKYCSQR	62.8	1441.69
3xFLAG::FBF-1 IP	Protein UNC-87, isoform b [Caenorhabditis elegans]	41576.2	28	55	0.709	LQSGTNRFASQAGMIGFGTCR	58	2259.08
3xFLAG::FBF-1 IP	Protein UNC-87, isoform b [Caenorhabditis elegans]	41576.2	28	55	0.709	MPPTEDQVVAEEQPNATMETKVTGQGQPK	76.1	3140.49
3xFLAG::FBF-1 IP	Protein UNC-87, isoform b [Caenorhabditis elegans]	41576.2	28	55	0.709	MSEGIVR	47.4	807.403
3xFLAG::FBF-1 IP	Protein UNC-87, isoform b [Caenorhabditis elegans]	41576.2	28	55	0.709	MTSFGAPR	42.7	882.414
3xFLAG::FBF-1 IP	Protein UNC-87, isoform b [Caenorhabditis elegans]	41576.2	28	55	0.709	MTSFGAPRDVK	46	1208.61
3xFLAG::FBF-1 IP	Protein UNC-87, isoform b [Caenorhabditis elegans]	41576.2	28	55	0.709	MVDSKHPEYDHEKPDQSEIPLQSGTNK	31	3110.44
3xFLAG::FBF-1 IP	Protein UNC-87, isoform b [Caenorhabditis elegans]	41576.2	28	55	0.709	MVDSNHPDYSHECSIDQTTIPSQMGSNQYASQK	28.4	3755.6
3xFLAG::FBF-1 IP	Protein UNC-87, isoform b [Caenorhabditis elegans]	41576.2	28	55	0.709	MVDSNHPDYSHECSIDQTTIPSQMGSNQYASQKGMTGFGQPR	24	4687.03
3xFLAG::FBF-1 IP	Protein UNC-87, isoform b [Caenorhabditis elegans]	41576.2	28	55	0.709	NTTFEAEGGELPYEAMK	104	1886.85
3xFLAG::FBF-1 IP	Protein UNC-87, isoform b [Caenorhabditis elegans]	41576.2	28	55	0.709	PPTEDQVVAEEQPNATMETK	69.6	2214.02
3xFLAG::FBF-1 IP	Protein UNC-87, isoform b [Caenorhabditis elegans]	41576.2	28	55	0.709	PPTEDQVVAEEQPNATMETKVTGQGQPK	89	3009.45
3xFLAG::FBF-1 IP	Protein UNC-87, isoform b [Caenorhabditis elegans]	41576.2	28	55	0.709	QTDGIIPSQAGWNKGDSQK	53.5	2029.99
3xFLAG::FBF-1 IP	Protein UNC-87, isoform b [Caenorhabditis elegans]	41576.2	28	55	0.709	SQGMVRLQSGTNR	34.4	1433.73
3xFLAG::FBF-1 IP	Protein UNC-87, isoform b [Caenorhabditis elegans]	41576.2	28	55	0.709	VAQNPADLAELPEEK	54.8	1623.82
3xFLAG::FBF-1 IP	Protein UNC-87, isoform b [Caenorhabditis elegans]	41576.2	28	55	0.709	VAQNPADLAELPEEKIR	74.5	1893.01
3xFLAG::FBF-1 IP	Protein UNC-87, isoform b [Caenorhabditis elegans]	41576.2	28	55	0.709	WEVLDPSISWQNR	39.4	1629.8
3xFLAG::FBF-1 IP	Protein UNC-87, isoform b [Caenorhabditis elegans]	41576.2	28	55	0.709	WEVLDPSISWQNRK	52	1757.9
3xFLAG::FBF-1 IP	Protein UNC-87, isoform b [Caenorhabditis elegans]	41576.2	28	55	0.709	WTLAQLR	50.1	887.51
3xFLAG::FBF-1 IP	Protein PAB-1, isoform b [Caenorhabditis elegans]	64767.1	1	1	0.0515	MHGNVPGAAMYNPTQPGPGYYVANPMQQQR	38.8	3275.48
3xFLAG::FBF-1 IP	Protein CAH-4, isoform a [Caenorhabditis elegans]	26170.3	10	11	0.443	ATGNATPIAMPK	50.8	1171.61
3xFLAG::FBF-1 IP	Protein CAH-4, isoform a [Caenorhabditis elegans]	26170.3	10	11	0.443	DFHIEHLLPSPDKR	34.7	1703.89
3xFLAG::FBF-1 IP	Protein CAH-4, isoform a [Caenorhabditis elegans]	26170.3	10	11	0.443	EIRSSFNF	23.6	999.489
3xFLAG::FBF-1 IP	Protein CAH-4, isoform a [Caenorhabditis elegans]	26170.3	10	11	0.443	FALAQFHAHWGSNSK	24.1	1700.83
3xFLAG::FBF-1 IP	Protein CAH-4, isoform a [Caenorhabditis elegans]	26170.3	10	11	0.443	NCGTFLTANHLPSSK	59.1	1647.78
3xFLAG::FBF-1 IP	Protein CAH-4, isoform a [Caenorhabditis elegans]	26170.3	10	11	0.443	NIIPANHR	27.4	935.506
3xFLAG::FBF-1 IP	Protein CAH-4, isoform a [Caenorhabditis elegans]	26170.3	10	11	0.443	QSPIDIVPQHVCCDTDVCK	32.2	2271.02
3xFLAG::FBF-1 IP	Protein CAH-4, isoform a [Caenorhabditis elegans]	26170.3	10	11	0.443	RNCGTFLTANHLPSSK	56.4	1802.9
3xFLAG::FBF-1 IP	Protein CAH-4, isoform a [Caenorhabditis elegans]	26170.3	10	11	0.443	SGDCCDVLVSEGGFLVNVKR	76.8	2211.05
3xFLAG::FBF-1 IP	Protein CAH-4, isoform a [Caenorhabditis elegans]	26170.3	10	11	0.443	YNDNYHGLIDTVR	29.6	1579.75
3xFLAG::FBF-1 IP	Protein MLC-2 [Caenorhabditis elegans]	18604.4	6	7	0.406	AFAHLITTGAQDELASA	40.5	1715.86
3xFLAG::FBF-1 IP	Protein MLC-2 [Caenorhabditis elegans]	18604.4	6	7	0.406	GKPPIEGGEVDYKAFAHLITTGAQDELASA	20.5	3085.55
3xFLAG::FBF-1 IP	Protein MLC-2 [Caenorhabditis elegans]	18604.4	6	7	0.406	IKEDDLIK	38.7	973.557
3xFLAG::FBF-1 IP	Protein MLC-2 [Caenorhabditis elegans]	18604.4	6	7	0.406	LTGTDPEATIVGAFAMFDK	29.7	1983.97
3xFLAG::FBF-1 IP	Protein MLC-2 [Caenorhabditis elegans]	18604.4	6	7	0.406	RSGSEAAQFDQK	26.8	1323.63
3xFLAG::FBF-1 IP	Protein MLC-2 [Caenorhabditis elegans]	18604.4	6	7	0.406	SGSEAAQFDQK	54.2	1167.53
3xFLAG::FBF-1 IP	Protein CHC-1 [Caenorhabditis elegans]	191546	2	2	0.0131	IYIDSNNNPER	48.5	1334.63
3xFLAG::FBF-1 IP	Protein CHC-1 [Caenorhabditis elegans]	191546	2	2	0.0131	VAASAPQGILR	37.7	1082.63
3xFLAG::FBF-1 IP	Protein MLC-3, isoform a [Caenorhabditis elegans]	17145.1	6	10	0.307	AAGLKPTQAMVTK	54.2	1315.74
3xFLAG::FBF-1 IP	Protein MLC-3, isoform a [Caenorhabditis elegans]	17145.1	6	10	0.307	AAGLKPTQAMVTKAAGQEFK	43.4	2047.1
3xFLAG::FBF-1 IP	Protein MLC-3, isoform a [Caenorhabditis elegans]	17145.1	6	10	0.307	AAGQEFKR	31.4	906.479
3xFLAG::FBF-1 IP	Protein MLC-3, isoform a [Caenorhabditis elegans]	17145.1	6	10	0.307	KVLAGPFPDQD	54.9	1186.61
3xFLAG::FBF-1 IP	Protein MLC-3, isoform a [Caenorhabditis elegans]	17145.1	6	10	0.307	LTFEEWLPMYEQLAK	28.6	1897.94
3xFLAG::FBF-1 IP	Protein MLC-3, isoform a [Caenorhabditis elegans]	17145.1	6	10	0.307	VLAGPFPDQD	66.2	1058.52
3xFLAG::FBF-1 IP	Protein MYO-3 [Caenorhabditis elegans]	225515	30	35	0.174	AATAARPFDSK	41.3	1134.59
3xFLAG::FBF-1 IP	Protein MYO-3 [Caenorhabditis elegans]	225515	30	35	0.174	ALQLKVQELTDTNEGLFAK	23.3	2118.14
3xFLAG::FBF-1 IP	Protein MYO-3 [Caenorhabditis elegans]	225515	30	35	0.174	ASASMAPPDGFPMVPSASSALIR	60.5	2260.11
3xFLAG::FBF-1 IP	Protein MYO-3 [Caenorhabditis elegans]	225515	30	35	0.174	ATDMTYAQK	35.4	1028.47
3xFLAG::FBF-1 IP	Protein MYO-3 [Caenorhabditis elegans]	225515	30	35	0.174	EKEEDSLNHETAISSLR	49.5	1957.95
3xFLAG::FBF-1 IP	Protein MYO-3 [Caenorhabditis elegans]	225515	30	35	0.174	GGTLEEQIVQTNPVLEAFGNAK	79.2	2315.19
3xFLAG::FBF-1 IP	Protein MYO-3 [Caenorhabditis elegans]	225515	30	35	0.174	HGDSVAELTEQLETLQKLK	72.2	2139.13
3xFLAG::FBF-1 IP	Protein MYO-3 [Caenorhabditis elegans]	225515	30	35	0.174	IASQEKVR	52.6	930.537
3xFLAG::FBF-1 IP	Protein MYO-3 [Caenorhabditis elegans]	225515	30	35	0.174	IIAQLEAR	47.1	913.547
3xFLAG::FBF-1 IP	Protein MYO-3 [Caenorhabditis elegans]	225515	30	35	0.174	IQEKEEEFENTR	40.2	1551.73
3xFLAG::FBF-1 IP	Protein MYO-3 [Caenorhabditis elegans]	225515	30	35	0.174	IRASASMAPPDGFPMVPSASSALIR	20.7	2529.3
3xFLAG::FBF-1 IP	Protein MYO-3 [Caenorhabditis elegans]	225515	30	35	0.174	KGGTLEEQIVQTNPVLEAFGNAK	45.6	2443.28
3xFLAG::FBF-1 IP	Protein MYO-3 [Caenorhabditis elegans]	225515	30	35	0.174	LAENNSIIAK	31	1072.6
3xFLAG::FBF-1 IP	Protein MYO-3 [Caenorhabditis elegans]	225515	30	35	0.174	LAGGDIEHYLLEK	24.8	1457.76
3xFLAG::FBF-1 IP	Protein MYO-3 [Caenorhabditis elegans]	225515	30	35	0.174	LEEAVQRGEIAR	26.7	1370.74
3xFLAG::FBF-1 IP	Protein MYO-3 [Caenorhabditis elegans]	225515	30	35	0.174	LIKELTAR	49.2	943.594
3xFLAG::FBF-1 IP	Protein MYO-3 [Caenorhabditis elegans]	225515	30	35	0.174	NAELEEELEAERNSR	30.1	1788.84
3xFLAG::FBF-1 IP	Protein MYO-3 [Caenorhabditis elegans]	225515	30	35	0.174	NAILQSEKDELAQQAEAAER	55.7	2215.08
3xFLAG::FBF-1 IP	Protein MYO-3 [Caenorhabditis elegans]	225515	30	35	0.174	NNNSSRFGK	27.5	1023.5
3xFLAG::FBF-1 IP	Protein MYO-3 [Caenorhabditis elegans]	225515	30	35	0.174	QISKLNAEIQQWK	31.8	1585.87
3xFLAG::FBF-1 IP	Protein MYO-3 [Caenorhabditis elegans]	225515	30	35	0.174	QVEEAEEVAASNLNK	63.8	1630.79
3xFLAG::FBF-1 IP	Protein MYO-3 [Caenorhabditis elegans]	225515	30	35	0.174	RHGDSVAELTEQLETLQK	37.4	2055.04
3xFLAG::FBF-1 IP	Protein MYO-3 [Caenorhabditis elegans]	225515	30	35	0.174	SLQDEMANQDEAVAK	49.2	1648.75
3xFLAG::FBF-1 IP	Protein MYO-3 [Caenorhabditis elegans]	225515	30	35	0.174	THFSGSGKLAGGDIEHYLLEK	27.4	2259.14
3xFLAG::FBF-1 IP	Protein MYO-3 [Caenorhabditis elegans]	225515	30	35	0.174	TIEVQYSELQTK	20.9	1438.74
3xFLAG::FBF-1 IP	Protein MYO-3 [Caenorhabditis elegans]	225515	30	35	0.174	TIEVQYSELQTKADEQSR	28.8	2126.03
3xFLAG::FBF-1 IP	Protein MYO-3 [Caenorhabditis elegans]	225515	30	35	0.174	TVRNNNSSR	21.3	1047.53
3xFLAG::FBF-1 IP	Protein MYO-3 [Caenorhabditis elegans]	225515	30	35	0.174	VLTAQFEQAEERADIAENALSK	47.6	2434.21
3xFLAG::FBF-1 IP	Protein MYO-3 [Caenorhabditis elegans]	225515	30	35	0.174	VQELTDTNEGLFAK	50.7	1564.79
3xFLAG::FBF-1 IP	Protein MYO-3 [Caenorhabditis elegans]	225515	30	35	0.174	YAILAADAAK	40.4	1006.56
3xFLAG::FBF-1 IP	Protein RPL-21 [Caenorhabditis elegans]	18310.9	1	1	0.149	GAHTVTTQNNEPELLAPLRFEIVA	20.3	2620.37
3xFLAG::FBF-1 IP	Protein HSP-12.2 [Caenorhabditis elegans]	12264.4	3	3	0.264	AYKLPDDVDVSTVK	42.7	1549.81
3xFLAG::FBF-1 IP	Protein HSP-12.2 [Caenorhabditis elegans]	12264.4	3	3	0.264	GVLTITASK	36.2	889.535
3xFLAG::FBF-1 IP	Protein HSP-12.2 [Caenorhabditis elegans]	12264.4	3	3	0.264	SHLATRGVLTITASK	43.3	1554.9
3xFLAG::FBF-1 IP	Protein RLA-1 [Caenorhabditis elegans]	11284	2	3	0.532	AANVEFEPYWPGLFAK	57.9	1838.91
3xFLAG::FBF-1 IP	Protein RLA-1 [Caenorhabditis elegans]	11284	2	3	0.532	ALEGVDVKNLITSVSSGAGSGPAPAAAAAAPAAGGAAPAAETK	20.9	3744.94
3xFLAG::FBF-1 IP	Protein RPL-7A, isoform c [Caenorhabditis elegans]	27939.1	1	1	0.0449	NFNIGQDIQPK	45.9	1273.65
3xFLAG::FBF-1 IP	Protein F15G9.1, isoform c [Caenorhabditis elegans]	30694.2	1	1	0.0899	YTSSYTPSSRYGSGWDYSSSYSSSR	23.4	2818.19
3xFLAG::FBF-1 IP	Protein FLU-2 [Caenorhabditis elegans]	54050.3	8	12	0.266	AFPSDHYAIESQIR	49.6	1633.8
3xFLAG::FBF-1 IP	Protein FLU-2 [Caenorhabditis elegans]	54050.3	8	12	0.266	AGTLPDADPSLVDPESDSIYLCGNSLGLMPK	24.2	3233.52
3xFLAG::FBF-1 IP	Protein FLU-2 [Caenorhabditis elegans]	54050.3	8	12	0.266	FISVLQEVAHIVESE	63	1699.89
3xFLAG::FBF-1 IP	Protein FLU-2 [Caenorhabditis elegans]	54050.3	8	12	0.266	FSSPIDIIYPELVK	30.7	1620.89
3xFLAG::FBF-1 IP	Protein FLU-2 [Caenorhabditis elegans]	54050.3	8	12	0.266	FSSPIDIIYPELVKR	29.9	1776.99
3xFLAG::FBF-1 IP	Protein FLU-2 [Caenorhabditis elegans]	54050.3	8	12	0.266	LSISIITPEEFHQR	44.7	1669.89
3xFLAG::FBF-1 IP	Protein FLU-2 [Caenorhabditis elegans]	54050.3	8	12	0.266	MGVFGHMSGEVPWAHCDEYCLEGVGR	24.6	2980.26
3xFLAG::FBF-1 IP	Protein FLU-2 [Caenorhabditis elegans]	54050.3	8	12	0.266	TVQDSMVCLEPR	56.9	1450.67
3xFLAG::FBF-1 IP	Protein BEN-1 [Caenorhabditis elegans]	49446.5	2	4	0.0923	AVLVDLEPGTMDSVR	55.3	1601.82
3xFLAG::FBF-1 IP	Protein BEN-1 [Caenorhabditis elegans]	49446.5	2	4	0.0923	SGPFGQLFRPDNFVFGQSGAGNNWAK	36	2798.34
3xFLAG::FBF-1 IP	Protein LET-805, isoform b [Caenorhabditis elegans]	497446	2	2	0.00517	AAQDAQVGGTDTYAK	21.7	1495.7
3xFLAG::FBF-1 IP	Protein LET-805, isoform b [Caenorhabditis elegans]	497446	2	2	0.00517	QGYVDGFK	24	914.426
3xFLAG::FBF-1 IP	Protein LEC-2, isoform b [Caenorhabditis elegans]	131928	1	1	0.108	FASYAHRLSPDEVNGLQIGGDVEITGIQLA	48.5	3171.6
3xFLAG::FBF-1 IP	Protein Y43F8B.1, isoform d [Caenorhabditis elegans]	76095.2	11	12	0.232	AVILADDACWQTQR	75.7	1646.8
3xFLAG::FBF-1 IP	Protein Y43F8B.1, isoform d [Caenorhabditis elegans]	76095.2	11	12	0.232	KTEVPVQAQAQPAQSTVPQK	38.2	2135.15
3xFLAG::FBF-1 IP	Protein Y43F8B.1, isoform d [Caenorhabditis elegans]	76095.2	11	12	0.232	MLEAQQLAK	33.2	1031.56
3xFLAG::FBF-1 IP	Protein Y43F8B.1, isoform d [Caenorhabditis elegans]	76095.2	11	12	0.232	NQIQGPQPEQPKQATAVAPPTGK	34	2386.24
3xFLAG::FBF-1 IP	Protein Y43F8B.1, isoform d [Caenorhabditis elegans]	76095.2	11	12	0.232	QTVQVQEQELAVGGHQAMSPIMAR	43	2610.27
3xFLAG::FBF-1 IP	Protein Y43F8B.1, isoform d [Caenorhabditis elegans]	76095.2	11	12	0.232	RVPAEIQLPQVGK	39.2	1434.84
3xFLAG::FBF-1 IP	Protein Y43F8B.1, isoform d [Caenorhabditis elegans]	76095.2	11	12	0.232	SGAIAQAQPAQQEIHAATGPK	30.3	2074.07
3xFLAG::FBF-1 IP	Protein Y43F8B.1, isoform d [Caenorhabditis elegans]	76095.2	11	12	0.232	TALRQTVQVQEQELAVGGHQAMSPIMAR	74.2	3049.57
3xFLAG::FBF-1 IP	Protein Y43F8B.1, isoform d [Caenorhabditis elegans]	76095.2	11	12	0.232	TKTQDWVPVNNEQNELQR	37.6	2199.08
3xFLAG::FBF-1 IP	Protein Y43F8B.1, isoform d [Caenorhabditis elegans]	76095.2	11	12	0.232	TQDWVPVNNEQNELQR	49.3	1969.94
3xFLAG::FBF-1 IP	Protein Y43F8B.1, isoform d [Caenorhabditis elegans]	76095.2	11	12	0.232	VAQAQNQAQVNQAAQDQAK	29.4	2011
3xFLAG::FBF-1 IP	Protein ABTS-3, isoform a [Caenorhabditis elegans]	107986	1	1	0.025	YASETSFATETASESSLEREVPSR	32.2	2634.22
3xFLAG::FBF-1 IP	Protein TNT-2, isoform a [Caenorhabditis elegans]	36954.4	9	17	0.234	AEGLTKEQQEDAK	27.5	1446.71
3xFLAG::FBF-1 IP	Protein TNT-2, isoform a [Caenorhabditis elegans]	36954.4	9	17	0.234	AFLNVVCK	32.7	950.513
3xFLAG::FBF-1 IP	Protein TNT-2, isoform a [Caenorhabditis elegans]	36954.4	9	17	0.234	AQDVSTLMPNDLKER	44.9	1732.85
3xFLAG::FBF-1 IP	Protein TNT-2, isoform a [Caenorhabditis elegans]	36954.4	9	17	0.234	GDQAANFGNLAQGAK	55.7	1462.69
3xFLAG::FBF-1 IP	Protein TNT-2, isoform a [Caenorhabditis elegans]	36954.4	9	17	0.234	GLDPEEAASSVHPPK	48.3	1533.75
3xFLAG::FBF-1 IP	Protein TNT-2, isoform a [Caenorhabditis elegans]	36954.4	9	17	0.234	IKGIHAR	39	794.5
3xFLAG::FBF-1 IP	Protein TNT-2, isoform a [Caenorhabditis elegans]	36954.4	9	17	0.234	NFTVSNKGDQAANFGNLAQGAK	54.3	2252.11
3xFLAG::FBF-1 IP	Protein TNT-2, isoform a [Caenorhabditis elegans]	36954.4	9	17	0.234	QQMMAGSFAGAAVGAPGGK	113	1735.83
3xFLAG::FBF-1 IP	Protein TNT-2, isoform a [Caenorhabditis elegans]	36954.4	9	17	0.234	RQQMMAGSFAGAAVGAPGGK	18.5	1891.93
3xFLAG::FBF-1 IP	Protein EEF-2, isoform a [Caenorhabditis elegans]	94797.6	1	1	0.0106	VNFTVDEIR	22.5	1093.55
3xFLAG::FBF-1 IP	Protein ACT-3 [Caenorhabditis elegans]	41796.6	2	7	0.684	AGFAGDDAPR	77.1	976.448
3xFLAG::FBF-1 IP	Protein ACT-3 [Caenorhabditis elegans]	41796.6	2	7	0.684	AGFAGDDAPRAVFPSIVGRPR	56.3	2156.14
3xFLAG::FBF-1 IP	Protein ACT-3 [Caenorhabditis elegans]	41796.6	2	7	0.684	AVFPSIVGRPR	53.7	1198.71
3xFLAG::FBF-1 IP	Protein ACT-3 [Caenorhabditis elegans]	41796.6	2	7	0.684	CPEAMFQPSFLGMESAGIHETSYNSIMK	77.8	3162.4
3xFLAG::FBF-1 IP	Protein ACT-3 [Caenorhabditis elegans]	41796.6	2	7	0.684	DLTDYLMK	31.1	998.486
3xFLAG::FBF-1 IP	Protein ACT-3 [Caenorhabditis elegans]	41796.6	2	7	0.684	DLYANTVLSGGTTMYPGIADR	70.1	2215.07
3xFLAG::FBF-1 IP	Protein ACT-3 [Caenorhabditis elegans]	41796.6	2	7	0.684	DLYANTVLSGGTTMYPGIADRMQK	50.4	2602.26
3xFLAG::FBF-1 IP	Protein ACT-3 [Caenorhabditis elegans]	41796.6	2	7	0.684	DSYVGDEAQSK	57.9	1198.52
3xFLAG::FBF-1 IP	Protein ACT-3 [Caenorhabditis elegans]	41796.6	2	7	0.684	DSYVGDEAQSKR	60.2	1354.62
3xFLAG::FBF-1 IP	Protein ACT-3 [Caenorhabditis elegans]	41796.6	2	7	0.684	EITALAPSTMK	46.7	1161.62
3xFLAG::FBF-1 IP	Protein ACT-3 [Caenorhabditis elegans]	41796.6	2	7	0.684	EITALAPSTMKIK	34.1	1418.79
3xFLAG::FBF-1 IP	Protein ACT-3 [Caenorhabditis elegans]	41796.6	2	7	0.684	EKLCYVALDFEQEMATAASSSSLEK	56	2807.31
3xFLAG::FBF-1 IP	Protein ACT-3 [Caenorhabditis elegans]	41796.6	2	7	0.684	FRCPEAMFQPSFLGMESAGIHETSYNSIMK	76.7	3465.57
3xFLAG::FBF-1 IP	Protein ACT-3 [Caenorhabditis elegans]	41796.6	2	7	0.684	GYSFTTTAER	53.6	1132.53
3xFLAG::FBF-1 IP	Protein ACT-3 [Caenorhabditis elegans]	41796.6	2	7	0.684	GYSFTTTAEREIVR	26.4	1629.82
3xFLAG::FBF-1 IP	Protein ACT-3 [Caenorhabditis elegans]	41796.6	2	7	0.684	HQGVMVGMGQK	62.4	1171.57
3xFLAG::FBF-1 IP	Protein ACT-3 [Caenorhabditis elegans]	41796.6	2	7	0.684	HQGVMVGMGQKDSYVGDEAQSK	99.7	2351.08
3xFLAG::FBF-1 IP	Protein ACT-3 [Caenorhabditis elegans]	41796.6	2	7	0.684	IWHHTFYNELR	38	1515.75
3xFLAG::FBF-1 IP	Protein ACT-3 [Caenorhabditis elegans]	41796.6	2	7	0.684	KDLYANTVLSGGTTMYPGIADR	74.6	2343.17
3xFLAG::FBF-1 IP	Protein ACT-3 [Caenorhabditis elegans]	41796.6	2	7	0.684	LCYVALDFEQEMATAASSSSLEK	81.9	2550.17
3xFLAG::FBF-1 IP	Protein ACT-3 [Caenorhabditis elegans]	41796.6	2	7	0.684	LCYVALDFEQEMATAASSSSLEKSYELPDGQVITVGNER	82.8	4308.03
3xFLAG::FBF-1 IP	Protein ACT-3 [Caenorhabditis elegans]	41796.6	2	7	0.684	LDLAGRDLTDYLMK	36.6	1623.84
3xFLAG::FBF-1 IP	Protein ACT-3 [Caenorhabditis elegans]	41796.6	2	7	0.684	MQKEITALAPSTMK	94.8	1548.81
3xFLAG::FBF-1 IP	Protein ACT-3 [Caenorhabditis elegans]	41796.6	2	7	0.684	QEYDESGPSIVHRK	22.7	1644.8
3xFLAG::FBF-1 IP	Protein ACT-3 [Caenorhabditis elegans]	41796.6	2	7	0.684	SYELPDGQVITVGNER	86.6	1776.88
3xFLAG::FBF-1 IP	Protein ACT-3 [Caenorhabditis elegans]	41796.6	2	7	0.684	SYELPDGQVITVGNERFR	26.7	2080.05
3xFLAG::FBF-1 IP	Protein ACT-3 [Caenorhabditis elegans]	41796.6	2	7	0.684	TTGVVLDSGDGVTHTVPIYEGYALPHAILR	32.9	3151.64
3xFLAG::FBF-1 IP	Protein ACT-3 [Caenorhabditis elegans]	41796.6	2	7	0.684	VAPEEHPVLLTEAPLNPK	55.8	1954.06
3xFLAG::FBF-1 IP	Protein ACT-3 [Caenorhabditis elegans]	41796.6	2	7	0.684	VAPEEHPVLLTEAPLNPKANR	51.5	2295.25
3xFLAG::FBF-1 IP	Protein VIT-6, isoform a [Caenorhabditis elegans]	193219	8	10	0.0545	AFTLSLLR	45.8	920.556
3xFLAG::FBF-1 IP	Protein VIT-6, isoform a [Caenorhabditis elegans]	193219	8	10	0.0545	ASGSFQPTEFLSNLLEKLR	27.6	2138.11
3xFLAG::FBF-1 IP	Protein VIT-6, isoform a [Caenorhabditis elegans]	193219	8	10	0.0545	ATINVEPR	33.9	899.495
3xFLAG::FBF-1 IP	Protein VIT-6, isoform a [Caenorhabditis elegans]	193219	8	10	0.0545	IAMIQSRPVTFTR	27.7	1519.84
3xFLAG::FBF-1 IP	Protein VIT-6, isoform a [Caenorhabditis elegans]	193219	8	10	0.0545	LQSQVTLQWTDGNTVR	47.3	1845.95
3xFLAG::FBF-1 IP	Protein VIT-6, isoform a [Caenorhabditis elegans]	193219	8	10	0.0545	NLRDQPQMEER	19.7	1415.67
3xFLAG::FBF-1 IP	Protein VIT-6, isoform a [Caenorhabditis elegans]	193219	8	10	0.0545	TSVYCLPSSNSWAR	41.2	1627.75
3xFLAG::FBF-1 IP	Protein VIT-6, isoform a [Caenorhabditis elegans]	193219	8	10	0.0545	TSVYCLPSSNSWARR	23.5	1783.85
3xFLAG::FBF-1 IP	Protein F46G10.1, isoform a [Caenorhabditis elegans]	20368.7	12	16	0.596	AEVTSHHAR	41.5	1007.5
3xFLAG::FBF-1 IP	Protein F46G10.1, isoform a [Caenorhabditis elegans]	20368.7	12	16	0.596	ANTNDIVDIRNSVNQIANNTYYNNGGR	47.5	3011.42
3xFLAG::FBF-1 IP	Protein F46G10.1, isoform a [Caenorhabditis elegans]	20368.7	12	16	0.596	ASLHSNGVDMHTAEYADYK	25.6	2108.93
3xFLAG::FBF-1 IP	Protein F46G10.1, isoform a [Caenorhabditis elegans]	20368.7	12	16	0.596	ASLHSNGVDMHTAEYADYKK	32.8	2237.03
3xFLAG::FBF-1 IP	Protein F46G10.1, isoform a [Caenorhabditis elegans]	20368.7	12	16	0.596	DIVHINAGGTR	22.4	1152.61
3xFLAG::FBF-1 IP	Protein F46G10.1, isoform a [Caenorhabditis elegans]	20368.7	12	16	0.596	EADFFGMEVFK	45.9	1319.6
3xFLAG::FBF-1 IP	Protein F46G10.1, isoform a [Caenorhabditis elegans]	20368.7	12	16	0.596	FTTLYDTLAQSK	62.5	1387.71
3xFLAG::FBF-1 IP	Protein F46G10.1, isoform a [Caenorhabditis elegans]	20368.7	12	16	0.596	KAEVTSHHAR	35	1135.6
3xFLAG::FBF-1 IP	Protein F46G10.1, isoform a [Caenorhabditis elegans]	20368.7	12	16	0.596	NSVNQIANNTYYNNGGR	56.4	1899.86
3xFLAG::FBF-1 IP	Protein F46G10.1, isoform a [Caenorhabditis elegans]	20368.7	12	16	0.596	NSVNQIANNTYYNNGGRI	96.6	2013.93
3xFLAG::FBF-1 IP	Protein F46G10.1, isoform a [Caenorhabditis elegans]	20368.7	12	16	0.596	YLIQETLVDIEK	37.8	1463.8
3xFLAG::FBF-1 IP	Protein F46G10.1, isoform a [Caenorhabditis elegans]	20368.7	12	16	0.596	YLIQETLVDIEKEQR	50.8	1877
3xFLAG::FBF-1 IP	Protein C08A9.10 [Caenorhabditis elegans]	15946.6	2	2	0.158	SCIVQRFDK	38.9	1152.58
3xFLAG::FBF-1 IP	Protein C08A9.10 [Caenorhabditis elegans]	15946.6	2	2	0.158	SYNEIQWAFCTPR	74	1671.76
3xFLAG::FBF-1 IP	Protein RPS-8, isoform a [Caenorhabditis elegans]	23751.3	1	1	0.0721	IVDTMYNATNNELVR	29.7	1753.84
3xFLAG::FBF-1 IP	Protein KETN-1, isoform e [Caenorhabditis elegans]	554864	28	34	0.0812	AAILGDTQHEQSWQR	47.5	1739.85
3xFLAG::FBF-1 IP	Protein KETN-1, isoform e [Caenorhabditis elegans]	554864	28	34	0.0812	AENSLGQAETVATIR	24.2	1559.8
3xFLAG::FBF-1 IP	Protein KETN-1, isoform e [Caenorhabditis elegans]	554864	28	34	0.0812	AFNKLGESENQATIIIVPK	42.1	2072.14
3xFLAG::FBF-1 IP	Protein KETN-1, isoform e [Caenorhabditis elegans]	554864	28	34	0.0812	AIHDFGFVVLQLTPAEPQDSGTWTCR	38.2	2945.43
3xFLAG::FBF-1 IP	Protein KETN-1, isoform e [Caenorhabditis elegans]	554864	28	34	0.0812	AKAVEILEDNLR	33	1370.76
3xFLAG::FBF-1 IP	Protein KETN-1, isoform e [Caenorhabditis elegans]	554864	28	34	0.0812	ASSVANLVLTPR	75	1227.71
3xFLAG::FBF-1 IP	Protein KETN-1, isoform e [Caenorhabditis elegans]	554864	28	34	0.0812	AVNRVGEAVTSTK	50	1331.73
3xFLAG::FBF-1 IP	Protein KETN-1, isoform e [Caenorhabditis elegans]	554864	28	34	0.0812	AVSAFGEAATSCTVK	94.5	1498.72
3xFLAG::FBF-1 IP	Protein KETN-1, isoform e [Caenorhabditis elegans]	554864	28	34	0.0812	AWNDSGNAVTSANVGVQGSEGLLLDTSHPASLQK	54.5	3425.65
3xFLAG::FBF-1 IP	Protein KETN-1, isoform e [Caenorhabditis elegans]	554864	28	34	0.0812	CAPKDAILGAVQHPR	34.9	1632.86
3xFLAG::FBF-1 IP	Protein KETN-1, isoform e [Caenorhabditis elegans]	554864	28	34	0.0812	EGIISATQLPER	52.1	1313.71
3xFLAG::FBF-1 IP	Protein KETN-1, isoform e [Caenorhabditis elegans]	554864	28	34	0.0812	FKLNFDGLHYLTVSK	22.3	1781.96
3xFLAG::FBF-1 IP	Protein KETN-1, isoform e [Caenorhabditis elegans]	554864	28	34	0.0812	HGQTMISAK	30.3	972.493
3xFLAG::FBF-1 IP	Protein KETN-1, isoform e [Caenorhabditis elegans]	554864	28	34	0.0812	IAELETPIQR	45.8	1169.65
3xFLAG::FBF-1 IP	Protein KETN-1, isoform e [Caenorhabditis elegans]	554864	28	34	0.0812	ISCTNEFGVATLLIK	54.8	1665.89
3xFLAG::FBF-1 IP	Protein KETN-1, isoform e [Caenorhabditis elegans]	554864	28	34	0.0812	ISDAGEVVAIAR	93.7	1200.66
3xFLAG::FBF-1 IP	Protein KETN-1, isoform e [Caenorhabditis elegans]	554864	28	34	0.0812	LGESENQATIIIVPK	25.6	1611.9
3xFLAG::FBF-1 IP	Protein KETN-1, isoform e [Caenorhabditis elegans]	554864	28	34	0.0812	LTCTPKEGIISATQLPER	30.1	2014.06
3xFLAG::FBF-1 IP	Protein KETN-1, isoform e [Caenorhabditis elegans]	554864	28	34	0.0812	MINDFGWVIMDIAQTEPR	23.1	2136.03
3xFLAG::FBF-1 IP	Protein KETN-1, isoform e [Caenorhabditis elegans]	554864	28	34	0.0812	MINDFGWVIMDIAQTEPRDSGEWK	31.8	2839.31
3xFLAG::FBF-1 IP	Protein KETN-1, isoform e [Caenorhabditis elegans]	554864	28	34	0.0812	NGAPLPEASR	25.5	1012.51
3xFLAG::FBF-1 IP	Protein KETN-1, isoform e [Caenorhabditis elegans]	554864	28	34	0.0812	NIYWSEQGGAVQPK	39.1	1576.78
3xFLAG::FBF-1 IP	Protein KETN-1, isoform e [Caenorhabditis elegans]	554864	28	34	0.0812	NSLGEAQTIANFTVLPR	57.6	1830.97
3xFLAG::FBF-1 IP	Protein KETN-1, isoform e [Caenorhabditis elegans]	554864	28	34	0.0812	NTEGETISTATLDIFQNDDFRQTK	35.3	2744.3
3xFLAG::FBF-1 IP	Protein KETN-1, isoform e [Caenorhabditis elegans]	554864	28	34	0.0812	RAILELAR	36.8	941.589
3xFLAG::FBF-1 IP	Protein KETN-1, isoform e [Caenorhabditis elegans]	554864	28	34	0.0812	SRTPVNQLQDVSASK	52.7	1629.86
3xFLAG::FBF-1 IP	Protein KETN-1, isoform e [Caenorhabditis elegans]	554864	28	34	0.0812	TRHDFGYVALDILYAFAQDTGEWACVAR	64.2	3246.53
3xFLAG::FBF-1 IP	Protein KETN-1, isoform e [Caenorhabditis elegans]	554864	28	34	0.0812	VKMINDFGWVIMDIAQTEPR	25.8	2363.19
3xFLAG::FBF-1 IP	Protein T25F10.6, isoform a [Caenorhabditis elegans]	44367.9	25	45	0.707	AAAPPASLKSPTPGR	23.5	1420.79
3xFLAG::FBF-1 IP	Protein T25F10.6, isoform a [Caenorhabditis elegans]	44367.9	25	45	0.707	ASDGIVPLQSGTNK	49.4	1386.72
3xFLAG::FBF-1 IP	Protein T25F10.6, isoform a [Caenorhabditis elegans]	44367.9	25	45	0.707	ASDGIVPLQSGTNKLASQAGMTGIGMPR	47.6	2757.4
3xFLAG::FBF-1 IP	Protein T25F10.6, isoform a [Caenorhabditis elegans]	44367.9	25	45	0.707	DVRGEYVR	27.7	993.511
3xFLAG::FBF-1 IP	Protein T25F10.6, isoform a [Caenorhabditis elegans]	44367.9	25	45	0.707	EGASQAGMTGFGAFR	34.7	1486.67
3xFLAG::FBF-1 IP	Protein T25F10.6, isoform a [Caenorhabditis elegans]	44367.9	25	45	0.707	FANQAGMTGFGMPR	105	1484.68
3xFLAG::FBF-1 IP	Protein T25F10.6, isoform a [Caenorhabditis elegans]	44367.9	25	45	0.707	FASQKGQSGFGAVR	53.3	1439.74
3xFLAG::FBF-1 IP	Protein T25F10.6, isoform a [Caenorhabditis elegans]	44367.9	25	45	0.707	GMTGFGVPR	46.1	921.461
3xFLAG::FBF-1 IP	Protein T25F10.6, isoform a [Caenorhabditis elegans]	44367.9	25	45	0.707	GSTWLQSGTNK	42.8	1178.58
3xFLAG::FBF-1 IP	Protein T25F10.6, isoform a [Caenorhabditis elegans]	44367.9	25	45	0.707	GTGGASEVPEEK	38.5	1160.54
3xFLAG::FBF-1 IP	Protein T25F10.6, isoform a [Caenorhabditis elegans]	44367.9	25	45	0.707	GTGGASEVPEEKAR	35	1387.68
3xFLAG::FBF-1 IP	Protein T25F10.6, isoform a [Caenorhabditis elegans]	44367.9	25	45	0.707	IANLKGSTWLQSGTNK	39.5	1717.92
3xFLAG::FBF-1 IP	Protein T25F10.6, isoform a [Caenorhabditis elegans]	44367.9	25	45	0.707	LASQAGMTGIGMPR	104	1405.69
3xFLAG::FBF-1 IP	Protein T25F10.6, isoform a [Caenorhabditis elegans]	44367.9	25	45	0.707	LMRSEGIIPIQAGSNK	42.6	1713.93
3xFLAG::FBF-1 IP	Protein T25F10.6, isoform a [Caenorhabditis elegans]	44367.9	25	45	0.707	NNTVAFMQAQDQR	72.3	1522.71
3xFLAG::FBF-1 IP	Protein T25F10.6, isoform a [Caenorhabditis elegans]	44367.9	25	45	0.707	NNTVAFMQAQDQRSQGMIPYQMGVNFLESQAGK	27.5	3690.7
3xFLAG::FBF-1 IP	Protein T25F10.6, isoform a [Caenorhabditis elegans]	44367.9	25	45	0.707	QQNYSSGKPSTIHTKEK	33.4	1932.98
3xFLAG::FBF-1 IP	Protein T25F10.6, isoform a [Caenorhabditis elegans]	44367.9	25	45	0.707	QQVNFTPSIPQSVLR	54.1	1713.93
3xFLAG::FBF-1 IP	Protein T25F10.6, isoform a [Caenorhabditis elegans]	44367.9	25	45	0.707	QTSGWKEGASQAGMTGFGAFR	73.5	2174.01
3xFLAG::FBF-1 IP	Protein T25F10.6, isoform a [Caenorhabditis elegans]	44367.9	25	45	0.707	RPDVPFWTGQKEADHANQTGMTAFGTPR	49.2	3116.46
3xFLAG::FBF-1 IP	Protein T25F10.6, isoform a [Caenorhabditis elegans]	44367.9	25	45	0.707	SDNLAEITDEKK	31.2	1362.67
3xFLAG::FBF-1 IP	Protein T25F10.6, isoform a [Caenorhabditis elegans]	44367.9	25	45	0.707	SEGIIPIQAGSNK	62.1	1313.71
3xFLAG::FBF-1 IP	Protein T25F10.6, isoform a [Caenorhabditis elegans]	44367.9	25	45	0.707	SQGMIPYQMGVNFLESQAGK	67.6	2185.04
3xFLAG::FBF-1 IP	Protein T25F10.6, isoform a [Caenorhabditis elegans]	44367.9	25	45	0.707	SQGMIPYQMGVNFLESQAGKTGFGQPR	45.4	2928.41
3xFLAG::FBF-1 IP	Protein T25F10.6, isoform a [Caenorhabditis elegans]	44367.9	25	45	0.707	TNDQDRDSQGFIHLQMGTNK	28.8	2306.05
3xFLAG::FBF-1 IP	Protein SUF-1 [Caenorhabditis elegans]	84624.5	2	2	0.0367	SSALSDLKR	62.3	976.542
3xFLAG::FBF-1 IP	Protein SUF-1 [Caenorhabditis elegans]	84624.5	2	2	0.0367	TGYQVFVAAALLEYNCMK	23	2078.01
3xFLAG::FBF-1 IP	Protein CPF-1 [Caenorhabditis elegans]	47962.1	21	33	0.577	AAAFNSDGSLVATGSADCSIK	106	2041.95
3xFLAG::FBF-1 IP	Protein CPF-1 [Caenorhabditis elegans]	47962.1	21	33	0.577	AAAFNSDGSLVATGSADCSIKIMDVER	83.3	2785.31
3xFLAG::FBF-1 IP	Protein CPF-1 [Caenorhabditis elegans]	47962.1	21	33	0.577	ALSCHPGGEFLLVATDHPTVR	66.7	2277.14
3xFLAG::FBF-1 IP	Protein CPF-1 [Caenorhabditis elegans]	47962.1	21	33	0.577	DSILISGSNDK	49	1148.58
3xFLAG::FBF-1 IP	Protein CPF-1 [Caenorhabditis elegans]	47962.1	21	33	0.577	DSILISGSNDKTVK	69.9	1476.79
3xFLAG::FBF-1 IP	Protein CPF-1 [Caenorhabditis elegans]	47962.1	21	33	0.577	EMNENGPDAHHPVIR	26.7	1715.79
3xFLAG::FBF-1 IP	Protein CPF-1 [Caenorhabditis elegans]	47962.1	21	33	0.577	FWYRKPATNEH	36	1448.71
3xFLAG::FBF-1 IP	Protein CPF-1 [Caenorhabditis elegans]	47962.1	21	33	0.577	IMDVERILAR	26.8	1215.69
3xFLAG::FBF-1 IP	Protein CPF-1 [Caenorhabditis elegans]	47962.1	21	33	0.577	LFDFSKTAVK	24.5	1155.64
3xFLAG::FBF-1 IP	Protein CPF-1 [Caenorhabditis elegans]	47962.1	21	33	0.577	LLALGHTSACR	20.5	1198.64
3xFLAG::FBF-1 IP	Protein CPF-1 [Caenorhabditis elegans]	47962.1	21	33	0.577	LYNIETAQAYASANPDDQHTESVTDVHYSENAR	75.4	3711.63
3xFLAG::FBF-1 IP	Protein CPF-1 [Caenorhabditis elegans]	47962.1	21	33	0.577	RLLALGHTSACR	39.7	1354.74
3xFLAG::FBF-1 IP	Protein CPF-1 [Caenorhabditis elegans]	47962.1	21	33	0.577	SGSMCSWDAR	58.2	1156.45
3xFLAG::FBF-1 IP	Protein CPF-1 [Caenorhabditis elegans]	47962.1	21	33	0.577	SSPMQFEPVSSGLDLEYDADVQPVSSEPSEYETIYLTVHKAPCR	31.9	4959.29
3xFLAG::FBF-1 IP	Protein CPF-1 [Caenorhabditis elegans]	47962.1	21	33	0.577	TFVHSPSMPAFMTGSDDHR	24.1	2119.93
3xFLAG::FBF-1 IP	Protein CPF-1 [Caenorhabditis elegans]	47962.1	21	33	0.577	TFVHSPSMPAFMTGSDDHRAR	38.1	2347.07
3xFLAG::FBF-1 IP	Protein CPF-1 [Caenorhabditis elegans]	47962.1	21	33	0.577	TLSEVYPVR	34.3	1063.58
3xFLAG::FBF-1 IP	Protein CPF-1 [Caenorhabditis elegans]	47962.1	21	33	0.577	TLSEVYPVRALSCHPGGEFLLVATDHPTVR	24.9	3321.71
3xFLAG::FBF-1 IP	Protein CPF-1 [Caenorhabditis elegans]	47962.1	21	33	0.577	TLYDHVDDVNTVIFHPR	52.2	2041.01
3xFLAG::FBF-1 IP	Protein CPF-1 [Caenorhabditis elegans]	47962.1	21	33	0.577	TLYDHVDDVNTVIFHPRDSILISGSNDK	32.1	3170.58
3xFLAG::FBF-1 IP	Protein CPF-1 [Caenorhabditis elegans]	47962.1	21	33	0.577	TVKLFDFSK	30.2	1084.6
3xFLAG::FBF-1 IP	Protein RPS-19 [Caenorhabditis elegans]	16322.2	2	2	0.178	HLYFRPAGIGAFKK	21.4	1604.91
3xFLAG::FBF-1 IP	Protein RPS-19 [Caenorhabditis elegans]	16322.2	2	2	0.178	IATSLRSSGQQA	34	1218.64
3xFLAG::FBF-1 IP	Protein UNC-15, isoform b [Caenorhabditis elegans]	63703.5	5	10	0.108	HRSSVVTGK	38.4	970.543
3xFLAG::FBF-1 IP	Protein UNC-15, isoform b [Caenorhabditis elegans]	63703.5	5	10	0.108	QLAESESVTMQNLQR	113	1733.85
3xFLAG::FBF-1 IP	Protein UNC-15, isoform b [Caenorhabditis elegans]	63703.5	5	10	0.108	RQLAESESVTMQNLQR	61.4	1889.95
3xFLAG::FBF-1 IP	Protein UNC-15, isoform b [Caenorhabditis elegans]	63703.5	5	10	0.108	SSSKIFVTEDDY	69.7	1390.64
3xFLAG::FBF-1 IP	Protein UNC-15, isoform b [Caenorhabditis elegans]	63703.5	5	10	0.108	YQHELEDAEGRADQAESSLHLIR	38.9	2667.28
3xFLAG::FBF-1 IP	Protein MYO-5 [Caenorhabditis elegans]	227004	1	1	0.0157	KVEGELK	31.7	802.467
3xFLAG::FBF-1 IP	Protein MYO-5 [Caenorhabditis elegans]	227004	1	1	0.0157	LQEKEEEFENTR	40.2	1551.73
3xFLAG::FBF-1 IP	Protein MYO-5 [Caenorhabditis elegans]	227004	1	1	0.0157	NNNSSRFGK	27.5	1023.5
3xFLAG::FBF-1 IP	Protein MYO-5 [Caenorhabditis elegans]	227004	1	1	0.0157	TVRNNNSSR	21.3	1047.53
3xFLAG::FBF-1 IP	Protein VIT-2, isoform a [Caenorhabditis elegans]	180925	1	1	0.00558	VYLPSIAQR	31	1046.6
3xFLAG::FBF-1 IP	Protein LFI-1, isoform a [Caenorhabditis elegans]	273884	1	1	0.00292	SVGFYPR	27.5	825.425
3xFLAG::FBF-1 IP	Protein EEF-1A.1 [Caenorhabditis elegans]	50668.6	3	3	0.132	QTVAVGVIK	42.5	914.567
3xFLAG::FBF-1 IP	Protein EEF-1A.1 [Caenorhabditis elegans]	50668.6	3	3	0.132	SGDAGIVELIPTKPLCVESFTDYAPLGR	51.7	3005.53
3xFLAG::FBF-1 IP	Protein EEF-1A.1 [Caenorhabditis elegans]	50668.6	3	3	0.132	VETGIIKPGMVVTFAPQNVTTEVK	25.6	2558.39
3xFLAG::FBF-1 IP	Protein ACT-4, isoform a [Caenorhabditis elegans]	40427.2	29	76	0.684	AGFAGDDAPR	77.1	976.448
3xFLAG::FBF-1 IP	Protein ACT-4, isoform a [Caenorhabditis elegans]	40427.2	29	76	0.684	AGFAGDDAPRAVFPSIVGRPR	56.3	2156.14
3xFLAG::FBF-1 IP	Protein ACT-4, isoform a [Caenorhabditis elegans]	40427.2	29	76	0.684	AVFPSIVGRPR	53.7	1198.71
3xFLAG::FBF-1 IP	Protein ACT-4, isoform a [Caenorhabditis elegans]	40427.2	29	76	0.684	CPEALFQPSFLGMESAGIHETSYNSIMK	49.1	3144.45
3xFLAG::FBF-1 IP	Protein ACT-4, isoform a [Caenorhabditis elegans]	40427.2	29	76	0.684	DLTDYLMK	31.1	998.486
3xFLAG::FBF-1 IP	Protein ACT-4, isoform a [Caenorhabditis elegans]	40427.2	29	76	0.684	DLYANTVLSGGTTMYPGIADR	70.1	2215.07
3xFLAG::FBF-1 IP	Protein ACT-4, isoform a [Caenorhabditis elegans]	40427.2	29	76	0.684	DLYANTVLSGGTTMYPGIADRMQK	50.4	2602.26
3xFLAG::FBF-1 IP	Protein ACT-4, isoform a [Caenorhabditis elegans]	40427.2	29	76	0.684	DSYVGDEAQSK	57.9	1198.52
3xFLAG::FBF-1 IP	Protein ACT-4, isoform a [Caenorhabditis elegans]	40427.2	29	76	0.684	DSYVGDEAQSKR	60.2	1354.62
3xFLAG::FBF-1 IP	Protein ACT-4, isoform a [Caenorhabditis elegans]	40427.2	29	76	0.684	EITALAPSTMK	46.7	1161.62
3xFLAG::FBF-1 IP	Protein ACT-4, isoform a [Caenorhabditis elegans]	40427.2	29	76	0.684	EITALAPSTMKIK	34.1	1418.79
3xFLAG::FBF-1 IP	Protein ACT-4, isoform a [Caenorhabditis elegans]	40427.2	29	76	0.684	EKLCYVALDFEQEMATAASSSSLEK	56	2807.31
3xFLAG::FBF-1 IP	Protein ACT-4, isoform a [Caenorhabditis elegans]	40427.2	29	76	0.684	FRCPEALFQPSFLGMESAGIHETSYNSIMK	58.6	3449.59
3xFLAG::FBF-1 IP	Protein ACT-4, isoform a [Caenorhabditis elegans]	40427.2	29	76	0.684	GYSFTTTAER	53.6	1132.53
3xFLAG::FBF-1 IP	Protein ACT-4, isoform a [Caenorhabditis elegans]	40427.2	29	76	0.684	GYSFTTTAEREIVR	26.4	1629.82
3xFLAG::FBF-1 IP	Protein ACT-4, isoform a [Caenorhabditis elegans]	40427.2	29	76	0.684	HQGVMVGMGQK	62.4	1171.57
3xFLAG::FBF-1 IP	Protein ACT-4, isoform a [Caenorhabditis elegans]	40427.2	29	76	0.684	HQGVMVGMGQKDSYVGDEAQSK	99.7	2351.08
3xFLAG::FBF-1 IP	Protein ACT-4, isoform a [Caenorhabditis elegans]	40427.2	29	76	0.684	IWHHTFYNELR	38	1515.75
3xFLAG::FBF-1 IP	Protein ACT-4, isoform a [Caenorhabditis elegans]	40427.2	29	76	0.684	KDLYANTVLSGGTTMYPGIADR	74.6	2343.17
3xFLAG::FBF-1 IP	Protein ACT-4, isoform a [Caenorhabditis elegans]	40427.2	29	76	0.684	LCYVALDFEQEMATAASSSSLEK	81.9	2550.17
3xFLAG::FBF-1 IP	Protein ACT-4, isoform a [Caenorhabditis elegans]	40427.2	29	76	0.684	LCYVALDFEQEMATAASSSSLEKSYELPDGQVITVGNER	82.8	4308.03
3xFLAG::FBF-1 IP	Protein ACT-4, isoform a [Caenorhabditis elegans]	40427.2	29	76	0.684	LDLAGRDLTDYLMK	36.6	1623.84
3xFLAG::FBF-1 IP	Protein ACT-4, isoform a [Caenorhabditis elegans]	40427.2	29	76	0.684	MQKEITALAPSTMK	94.8	1548.81
3xFLAG::FBF-1 IP	Protein ACT-4, isoform a [Caenorhabditis elegans]	40427.2	29	76	0.684	QEYDESGPSIVHRK	22.7	1644.8
3xFLAG::FBF-1 IP	Protein ACT-4, isoform a [Caenorhabditis elegans]	40427.2	29	76	0.684	SYELPDGQVITVGNER	86.6	1776.88
3xFLAG::FBF-1 IP	Protein ACT-4, isoform a [Caenorhabditis elegans]	40427.2	29	76	0.684	SYELPDGQVITVGNERFR	26.7	2080.05
3xFLAG::FBF-1 IP	Protein ACT-4, isoform a [Caenorhabditis elegans]	40427.2	29	76	0.684	TTGVVLDSGDGVTHTVPIYEGYALPHAILR	32.9	3151.64
3xFLAG::FBF-1 IP	Protein ACT-4, isoform a [Caenorhabditis elegans]	40427.2	29	76	0.684	VAPEEHPVLLTEAPLNPK	55.8	1954.06
3xFLAG::FBF-1 IP	Protein ACT-4, isoform a [Caenorhabditis elegans]	40427.2	29	76	0.684	VAPEEHPVLLTEAPLNPKANR	51.5	2295.25
3xFLAG::FBF-1 IP	Protein ACT-4, isoform b [Caenorhabditis elegans]	37279.8	1	1	0.696	CPEALFQPSFLGMESAGIHETSYNSIMK	49.1	3144.45
3xFLAG::FBF-1 IP	Protein ACT-4, isoform b [Caenorhabditis elegans]	37279.8	1	1	0.696	DLTDYLMK	31.1	998.486
3xFLAG::FBF-1 IP	Protein ACT-4, isoform b [Caenorhabditis elegans]	37279.8	1	1	0.696	DLYANTVLSGGTTMYPGIADR	70.1	2215.07
3xFLAG::FBF-1 IP	Protein ACT-4, isoform b [Caenorhabditis elegans]	37279.8	1	1	0.696	DLYANTVLSGGTTMYPGIADRMQK	50.4	2602.26
3xFLAG::FBF-1 IP	Protein ACT-4, isoform b [Caenorhabditis elegans]	37279.8	1	1	0.696	DSYVGDEAQSK	57.9	1198.52
3xFLAG::FBF-1 IP	Protein ACT-4, isoform b [Caenorhabditis elegans]	37279.8	1	1	0.696	DSYVGDEAQSKR	60.2	1354.62
3xFLAG::FBF-1 IP	Protein ACT-4, isoform b [Caenorhabditis elegans]	37279.8	1	1	0.696	EITALAPSTMK	46.7	1161.62
3xFLAG::FBF-1 IP	Protein ACT-4, isoform b [Caenorhabditis elegans]	37279.8	1	1	0.696	EITALAPSTMKIK	34.1	1418.79
3xFLAG::FBF-1 IP	Protein ACT-4, isoform b [Caenorhabditis elegans]	37279.8	1	1	0.696	EKLCYVALDFEQEMATAASSSSLEK	56	2807.31
3xFLAG::FBF-1 IP	Protein ACT-4, isoform b [Caenorhabditis elegans]	37279.8	1	1	0.696	FRCPEALFQPSFLGMESAGIHETSYNSIMK	58.6	3449.59
3xFLAG::FBF-1 IP	Protein ACT-4, isoform b [Caenorhabditis elegans]	37279.8	1	1	0.696	GYSFTTTAER	53.6	1132.53
3xFLAG::FBF-1 IP	Protein ACT-4, isoform b [Caenorhabditis elegans]	37279.8	1	1	0.696	GYSFTTTAEREIVR	26.4	1629.82
3xFLAG::FBF-1 IP	Protein ACT-4, isoform b [Caenorhabditis elegans]	37279.8	1	1	0.696	IWHHTFYNELR	38	1515.75
3xFLAG::FBF-1 IP	Protein ACT-4, isoform b [Caenorhabditis elegans]	37279.8	1	1	0.696	KDLYANTVLSGGTTMYPGIADR	74.6	2343.17
3xFLAG::FBF-1 IP	Protein ACT-4, isoform b [Caenorhabditis elegans]	37279.8	1	1	0.696	LCYVALDFEQEMATAASSSSLEK	81.9	2550.17
3xFLAG::FBF-1 IP	Protein ACT-4, isoform b [Caenorhabditis elegans]	37279.8	1	1	0.696	LCYVALDFEQEMATAASSSSLEKSYELPDGQVITVGNER	82.8	4308.03
3xFLAG::FBF-1 IP	Protein ACT-4, isoform b [Caenorhabditis elegans]	37279.8	1	1	0.696	LDLAGRDLTDYLMK	36.6	1623.84
3xFLAG::FBF-1 IP	Protein ACT-4, isoform b [Caenorhabditis elegans]	37279.8	1	1	0.696	MQKEITALAPSTMK	94.8	1548.81
3xFLAG::FBF-1 IP	Protein ACT-4, isoform b [Caenorhabditis elegans]	37279.8	1	1	0.696	QEYDESGPSIVHRK	22.7	1644.8
3xFLAG::FBF-1 IP	Protein ACT-4, isoform b [Caenorhabditis elegans]	37279.8	1	1	0.696	SYELPDGQVITVGNER	86.6	1776.88
3xFLAG::FBF-1 IP	Protein ACT-4, isoform b [Caenorhabditis elegans]	37279.8	1	1	0.696	SYELPDGQVITVGNERFR	26.7	2080.05
3xFLAG::FBF-1 IP	Protein ACT-4, isoform b [Caenorhabditis elegans]	37279.8	1	1	0.696	TTGVVLDSGDGVTHTVPIYEGYALPHAILR	32.9	3151.64
3xFLAG::FBF-1 IP	Protein ACT-4, isoform b [Caenorhabditis elegans]	37279.8	1	1	0.696	VAPEEHPVLLTEAPLNPK	55.8	1954.06
3xFLAG::FBF-1 IP	Protein ACT-4, isoform b [Caenorhabditis elegans]	37279.8	1	1	0.696	VAPEEHPVLLTEAPLNPKANR	51.5	2295.25
3xFLAG::FBF-1 IP	Protein ACT-4, isoform b [Caenorhabditis elegans]	37279.8	1	1	0.696	VGMGQKDSYVGDEAQSK	37.9	1798.83
3xFLAG::FBF-1 IP	Protein NID-1, isoform b [Caenorhabditis elegans]	168392	7	7	0.0432	CTNRPGSFSCQCLQGYQGDGR	44.3	2449.01
3xFLAG::FBF-1 IP	Protein NID-1, isoform b [Caenorhabditis elegans]	168392	7	7	0.0432	GMAIFER	31.9	823.413
3xFLAG::FBF-1 IP	Protein NID-1, isoform b [Caenorhabditis elegans]	168392	7	7	0.0432	INVVYNDDEGVVR	36.3	1491.74
3xFLAG::FBF-1 IP	Protein NID-1, isoform b [Caenorhabditis elegans]	168392	7	7	0.0432	INVVYNDDEGVVRYGAK	22.7	1910.96
3xFLAG::FBF-1 IP	Protein NID-1, isoform b [Caenorhabditis elegans]	168392	7	7	0.0432	KSLVTEGLVNPR	36.7	1312.76
3xFLAG::FBF-1 IP	Protein NID-1, isoform b [Caenorhabditis elegans]	168392	7	7	0.0432	SLVTEGLVNPR	67.1	1184.66
3xFLAG::FBF-1 IP	Protein NID-1, isoform b [Caenorhabditis elegans]	168392	7	7	0.0432	VFGILAVPK	44	943.598
3xFLAG::FBF-1 IP	Protein ZC373.2 [Caenorhabditis elegans]	11058.5	1	2	0.308	TVVSAPIDGAPGTATCSDTTTPERCSGCCQAR	51.5	3384.46
3xFLAG::FBF-1 IP	Protein RPL-10 [Caenorhabditis elegans]	24749.4	1	1	0.0467	NCGKDGFHLR	27.5	1203.57
3xFLAG::FBF-1 IP	Protein TNT-4, isoform a [Caenorhabditis elegans]	43559.9	1	2	0.0461	SIAEASTILPNDMKAK	31.7	1704.88
3xFLAG::FBF-1 IP	Protein RPL-5 [Caenorhabditis elegans]	33387.3	1	1	0.058	FLAAGLNADNLVATYQK	70	1808.95
3xFLAG::FBF-1 IP	Protein RPS-12 [Caenorhabditis elegans]	15069	2	2	0.207	IIGEYCGLCK	27.6	1212.58
3xFLAG::FBF-1 IP	Protein RPS-12 [Caenorhabditis elegans]	15069	2	2	0.207	VVGCSSAVVTNWGNEEQGR	33.7	2049.93
3xFLAG::FBF-1 IP	Protein VIT-5 [Caenorhabditis elegans]	186441	1	1	0.00624	SILNLFSLRK	41.1	1190.73
3xFLAG::FBF-1 IP	Protein IFF-1, isoform b [Caenorhabditis elegans]	21678.1	3	3	0.155	GRPCKIVEMSTSK	22.2	1492.76
3xFLAG::FBF-1 IP	Protein IFF-1, isoform b [Caenorhabditis elegans]	21678.1	3	3	0.155	IVEMSTSK	25.4	894.46
3xFLAG::FBF-1 IP	Protein IFF-1, isoform b [Caenorhabditis elegans]	21678.1	3	3	0.155	VHMVAIDIFTTK	22.1	1374.75
3xFLAG::FBF-1 IP	Protein RPS-7 [Caenorhabditis elegans]	22058.4	1	1	0.119	TLTAVHDAWLDELVYPAEVVGRR	28	2610.37
3xFLAG::FBF-1 IP	Protein MIF-4 [Caenorhabditis elegans]	13808.3	1	1	0.116	SFATQGKTIASLYE	49.7	1515.77
3xFLAG::FBF-1 IP	Protein RPL-20 [Caenorhabditis elegans]	20959.4	2	2	0.0944	ALGETLNEYVVVGR	53	1519.81
3xFLAG::FBF-1 IP	Protein RPL-20 [Caenorhabditis elegans]	20959.4	2	2	0.0944	PTKALGETLNEYVVVGR	37.4	1846.01
3xFLAG::FBF-1 IP	Protein RPS-20 [Caenorhabditis elegans]	13234.8	2	2	0.265	LINLHAPAEVLR	32.1	1345.8
3xFLAG::FBF-1 IP	Protein RPS-20 [Caenorhabditis elegans]	13234.8	2	2	0.265	QITSISIEPGVDIEVTRAD	24.6	2043.06
3xFLAG::FBF-1 IP	Protein HSP-1 [Caenorhabditis elegans]	69725.1	1	2	0.0484	NTTIPTKTAQTFTTYSDNQPGVLIQVYEGER	26	3472.72
3xFLAG::FBF-1 IP	Protein ANT-1.1, isoform a [Caenorhabditis elegans]	33046.6	3	3	0.117	KFLIDLASGGTAAAVSK	24.2	1648.93
3xFLAG::FBF-1 IP	Protein ANT-1.1, isoform a [Caenorhabditis elegans]	33046.6	3	3	0.117	LLLQVQDASK	45.4	1114.65
3xFLAG::FBF-1 IP	Protein ANT-1.1, isoform a [Caenorhabditis elegans]	33046.6	3	3	0.117	TAVAPIER	32.3	856.489
3xFLAG::FBF-1 IP	Protein UNC-27 [Caenorhabditis elegans]	27560.9	2	2	0.169	KGFLTPER	31.4	947.531
3xFLAG::FBF-1 IP	Protein UNC-27 [Caenorhabditis elegans]	27560.9	2	2	0.169	LTQLEEEKYDINYVVSQTEAEINSLTIEVNDLR	32.6	3869.92
3xFLAG::FBF-1 IP	Protein ACT-5 [Caenorhabditis elegans]	41873.7	7	19	0.437	AGFAGDDAPR	77.1	976.448
3xFLAG::FBF-1 IP	Protein ACT-5 [Caenorhabditis elegans]	41873.7	7	19	0.437	AGFAGDDAPRAVFPSIVGRPR	56.3	2156.14
3xFLAG::FBF-1 IP	Protein ACT-5 [Caenorhabditis elegans]	41873.7	7	19	0.437	AVFPSIVGRPR	53.7	1198.71
3xFLAG::FBF-1 IP	Protein ACT-5 [Caenorhabditis elegans]	41873.7	7	19	0.437	DSYVGDEAQSK	57.9	1198.52
3xFLAG::FBF-1 IP	Protein ACT-5 [Caenorhabditis elegans]	41873.7	7	19	0.437	DSYVGDEAQSKR	60.2	1354.62
3xFLAG::FBF-1 IP	Protein ACT-5 [Caenorhabditis elegans]	41873.7	7	19	0.437	EEEIAALVVDNGSGMCK	92.6	1822.82
3xFLAG::FBF-1 IP	Protein ACT-5 [Caenorhabditis elegans]	41873.7	7	19	0.437	EEEIAALVVDNGSGMCKAGFAGDDAPR	95.8	2779.27
3xFLAG::FBF-1 IP	Protein ACT-5 [Caenorhabditis elegans]	41873.7	7	19	0.437	EIQHLAPSTMK	29.2	1254.65
3xFLAG::FBF-1 IP	Protein ACT-5 [Caenorhabditis elegans]	41873.7	7	19	0.437	FRCPEVLFQPAFIGMEGAGIHETTYQSIMK	28.1	3459.64
3xFLAG::FBF-1 IP	Protein ACT-5 [Caenorhabditis elegans]	41873.7	7	19	0.437	HQGVMVGMGQK	62.4	1171.57
3xFLAG::FBF-1 IP	Protein ACT-5 [Caenorhabditis elegans]	41873.7	7	19	0.437	HQGVMVGMGQKDSYVGDEAQSK	99.7	2351.08
3xFLAG::FBF-1 IP	Protein ACT-5 [Caenorhabditis elegans]	41873.7	7	19	0.437	IAPEEHPVLLTEAPLNPK	46.3	1968.08
3xFLAG::FBF-1 IP	Protein ACT-5 [Caenorhabditis elegans]	41873.7	7	19	0.437	IWHHTFYNELR	38	1515.75
3xFLAG::FBF-1 IP	Protein ACT-5 [Caenorhabditis elegans]	41873.7	7	19	0.437	MQKEIQHLAPSTMK	30.2	1642.83
3xFLAG::FBF-1 IP	Protein ACT-5 [Caenorhabditis elegans]	41873.7	7	19	0.437	QEYDESGPSIVHRK	22.7	1644.8
3xFLAG::FBF-1 IP	Protein ACT-5 [Caenorhabditis elegans]	41873.7	7	19	0.437	SYELPDGQVITIGNER	80.4	1790.89
3xFLAG::FBF-1 IP	Protein TNI-3 [Caenorhabditis elegans]	29839.4	1	1	0.131	KGFLTPER	31.4	947.531
3xFLAG::FBF-1 IP	Protein TNI-3 [Caenorhabditis elegans]	29839.4	1	1	0.131	TIPLPDVDSINDQGQLLKIYEDMFAR	41.2	2991.51
3xFLAG::FBF-1 IP	Protein PAT-10 [Caenorhabditis elegans]	18517.6	2	4	0.261	LFDKEGNGYISRPTLK	34.5	1838.96
3xFLAG::FBF-1 IP	Protein PAT-10 [Caenorhabditis elegans]	18517.6	2	4	0.261	QGYIMATQIGQIMHGMEQDFDEKTLR	47.5	3041.42
3xFLAG::FBF-1 IP	Protein VDAC-1 [Caenorhabditis elegans]	29961.3	2	2	0.0671	APPTFADLGK	34.2	1016.54
3xFLAG::FBF-1 IP	Protein VDAC-1 [Caenorhabditis elegans]	29961.3	2	2	0.0671	LDWALPTAR	48.7	1042.57
3xFLAG::FBF-1 IP	Protein TSN-1 [Caenorhabditis elegans]	100777	1	1	0.0175	LQTLVNDYNTTEEVAR	34.1	1865.92
3xFLAG::FBF-1 IP	Protein NMY-1 [Caenorhabditis elegans]	229375	11	13	0.0876	AAVADPATLAAWAQR	84.7	1511.8
3xFLAG::FBF-1 IP	Protein NMY-1 [Caenorhabditis elegans]	229375	11	13	0.0876	AQNQEQAEFAVEAIAK	25	1750.8
3xFLAG::FBF-1 IP	Protein NMY-1 [Caenorhabditis elegans]	229375	11	13	0.0876	AQVQLEQITTDLSMER	52.3	1862.92
3xFLAG::FBF-1 IP	Protein NMY-1 [Caenorhabditis elegans]	229375	11	13	0.0876	AVIQEQLQQESENSAELDDIRGR	57.2	2629.27
3xFLAG::FBF-1 IP	Protein NMY-1 [Caenorhabditis elegans]	229375	11	13	0.0876	HRYEILTPDVIPK	32.9	1580.88
3xFLAG::FBF-1 IP	Protein NMY-1 [Caenorhabditis elegans]	229375	11	13	0.0876	IAQLEEELEEEQSNCELAIDKQR	48.7	2774.32
3xFLAG::FBF-1 IP	Protein NMY-1 [Caenorhabditis elegans]	229375	11	13	0.0876	LATAEGQIQELNEQIQEETRLK	37.2	2541.32
3xFLAG::FBF-1 IP	Protein NMY-1 [Caenorhabditis elegans]	229375	11	13	0.0876	LDQVIVER	54.2	971.552
3xFLAG::FBF-1 IP	Protein NMY-1 [Caenorhabditis elegans]	229375	11	13	0.0876	MITALDIDTNLYR	12.7	1538.79
3xFLAG::FBF-1 IP	Protein NMY-1 [Caenorhabditis elegans]	229375	11	13	0.0876	QLDEAEDEMSRER	20.9	1607.7
3xFLAG::FBF-1 IP	Protein NMY-1 [Caenorhabditis elegans]	229375	11	13	0.0876	TEAEKQSLER	21.8	1190.6
3xFLAG::FBF-1 IP	Protein EPI-1, isoform c [Caenorhabditis elegans]	409240	13	15	0.0565	AQIDNAYEALSAEPAFAESVQNAR	35.3	2566.21
3xFLAG::FBF-1 IP	Protein EPI-1, isoform c [Caenorhabditis elegans]	409240	13	15	0.0565	CAPGYYNFPECIK	45.5	1618.7
3xFLAG::FBF-1 IP	Protein EPI-1, isoform c [Caenorhabditis elegans]	409240	13	15	0.0565	DEKSVDMQLVNAK	45.7	1476.74
3xFLAG::FBF-1 IP	Protein EPI-1, isoform c [Caenorhabditis elegans]	409240	13	15	0.0565	FGMESLSPISEDDSVTCRTDMASLQPLENAEMVIR	16.2	3928.81
3xFLAG::FBF-1 IP	Protein EPI-1, isoform c [Caenorhabditis elegans]	409240	13	15	0.0565	FVGEDCDQCASGYYDAPK	79.9	2081.82
3xFLAG::FBF-1 IP	Protein EPI-1, isoform c [Caenorhabditis elegans]	409240	13	15	0.0565	ITVDLGDAPAVVKLDTPVNDGLWR	38.7	2565.36
3xFLAG::FBF-1 IP	Protein EPI-1, isoform c [Caenorhabditis elegans]	409240	13	15	0.0565	LFVGGVPTSAR	32.5	1103.62
3xFLAG::FBF-1 IP	Protein EPI-1, isoform c [Caenorhabditis elegans]	409240	13	15	0.0565	LGSDNVDLESSHASKGVR	28.2	1870.93
3xFLAG::FBF-1 IP	Protein EPI-1, isoform c [Caenorhabditis elegans]	409240	13	15	0.0565	NLVVGVR	32	756.473
3xFLAG::FBF-1 IP	Protein EPI-1, isoform c [Caenorhabditis elegans]	409240	13	15	0.0565	QLEQLTELSEKLR	22.3	1586.88
3xFLAG::FBF-1 IP	Protein EPI-1, isoform c [Caenorhabditis elegans]	409240	13	15	0.0565	SLAEIALAIGSSSK	84.3	1346.75
3xFLAG::FBF-1 IP	Protein EPI-1, isoform c [Caenorhabditis elegans]	409240	13	15	0.0565	SLAEIALAIGSSSKAVNVDPR	37.1	2098.15
3xFLAG::FBF-1 IP	Protein EPI-1, isoform c [Caenorhabditis elegans]	409240	13	15	0.0565	SVLNLNQQISR	49.6	1271.71
3xFLAG::FBF-1 IP	Protein MLC-7 [Caenorhabditis elegans]	17309.1	2	2	0.176	AMMLNPTEALLAEVSK	34.3	1718.87
3xFLAG::FBF-1 IP	Protein MLC-7 [Caenorhabditis elegans]	17309.1	2	2	0.176	ITVEEFIPIYK	39	1351.75
3xFLAG::FBF-1 IP	Protein LAM-1, isoform a [Caenorhabditis elegans]	197952	12	15	0.0994	AAANILIDSILLAPPTSELHIFQGSAR	54.5	2818.55
3xFLAG::FBF-1 IP	Protein LAM-1, isoform a [Caenorhabditis elegans]	197952	12	15	0.0994	CDQCAIGTYGFGPSGCKK	36.4	2006.84
3xFLAG::FBF-1 IP	Protein LAM-1, isoform a [Caenorhabditis elegans]	197952	12	15	0.0994	CDQCEDLYWGDPTTPDGCHRCECNPTGSK	50.9	3516.33
3xFLAG::FBF-1 IP	Protein LAM-1, isoform a [Caenorhabditis elegans]	197952	12	15	0.0994	DIHEKTDFHATCG	42	1530.66
3xFLAG::FBF-1 IP	Protein LAM-1, isoform a [Caenorhabditis elegans]	197952	12	15	0.0994	GIYGRQCNQCQPGFWGFPECR	32.1	2617.13
3xFLAG::FBF-1 IP	Protein LAM-1, isoform a [Caenorhabditis elegans]	197952	12	15	0.0994	LAAAENQALR	52.9	1056.58
3xFLAG::FBF-1 IP	Protein LAM-1, isoform a [Caenorhabditis elegans]	197952	12	15	0.0994	LLYQAQR	29.8	891.505
3xFLAG::FBF-1 IP	Protein LAM-1, isoform a [Caenorhabditis elegans]	197952	12	15	0.0994	QCNQCQPGFWGFPECR	53.3	2070.84
3xFLAG::FBF-1 IP	Protein LAM-1, isoform a [Caenorhabditis elegans]	197952	12	15	0.0994	RMEGNVAPQQR	26.7	1285.64
3xFLAG::FBF-1 IP	Protein LAM-1, isoform a [Caenorhabditis elegans]	197952	12	15	0.0994	SIAANLESR	39.2	960.511
3xFLAG::FBF-1 IP	Protein LAM-1, isoform a [Caenorhabditis elegans]	197952	12	15	0.0994	TSECNCDATGSVSGICNVQGGQCECKPNVVGR	61.7	3501.46
3xFLAG::FBF-1 IP	Protein LAM-1, isoform a [Caenorhabditis elegans]	197952	12	15	0.0994	TSECNCDATGSVSGICNVQGGQCECKPNVVGRR	35.4	3657.56
3xFLAG::FBF-1 IP	Protein FBF-2 [Caenorhabditis elegans]	71807	3	5	0.0839	HQQNHIVTSRPPTPLTDLMSLR	38.1	2541.34
3xFLAG::FBF-1 IP	Protein FBF-2 [Caenorhabditis elegans]	71807	3	5	0.0839	SFQSFPNVFMPVSR	49	1642.8
3xFLAG::FBF-1 IP	Protein FBF-2 [Caenorhabditis elegans]	71807	3	5	0.0839	SNNVLPTWSLDSNGEMR	47.2	1920.88
3xFLAG::FBF-1 IP	Protein MUP-2 [Caenorhabditis elegans]	47040.4	5	7	0.244	GLDPEEAASSVHPPK	48.3	1533.75
3xFLAG::FBF-1 IP	Protein MUP-2 [Caenorhabditis elegans]	47040.4	5	7	0.244	NFLAAVCR	32.1	950.488
3xFLAG::FBF-1 IP	Protein MUP-2 [Caenorhabditis elegans]	47040.4	5	7	0.244	NFTVASKGDQAAQFGNLAQAK	50.7	2166.09
3xFLAG::FBF-1 IP	Protein MUP-2 [Caenorhabditis elegans]	47040.4	5	7	0.244	RAPVQEEKPPAEMTEAEIAMLAAK	38.4	2611.31
3xFLAG::FBF-1 IP	Protein MUP-2 [Caenorhabditis elegans]	47040.4	5	7	0.244	VQDVSGLLPNDLKER	77.5	1682.91
3xFLAG::FBF-1 IP	Protein MUP-2 [Caenorhabditis elegans]	47040.4	5	7	0.244	YLFENPEEEKQASLVR	53.8	1951.98
3xFLAG::FBF-1 IP	Protein RPL-13, isoform a [Caenorhabditis elegans]	23753.5	1	1	0.087	GFSLQELKAAGISQAQAR	36.8	1875.01
3xFLAG::FBF-1 IP	Protein MEL-26, isoform a [Caenorhabditis elegans]	44934.5	1	1	0.0861	QSSTGATSSVSNLPGVPMDIPGITGNIVPPPSGL	21.2	3425.55
3xFLAG::FBF-1 IP	Protein RPL-33 [Caenorhabditis elegans]	13768.5	1	1	0.0645	VLLYPSNI	33.3	918.529
3xFLAG::FBF-1 IP	Protein RPL-28 [Caenorhabditis elegans]	13725.1	5	5	0.468	AVTTSTLSKTPVASVR	80.8	1617.92
3xFLAG::FBF-1 IP	Protein RPL-28 [Caenorhabditis elegans]	13725.1	5	5	0.468	HAIDVSAAAKGVVVSTK	28.8	1652.93
3xFLAG::FBF-1 IP	Protein RPL-28 [Caenorhabditis elegans]	13725.1	5	5	0.468	NAGFNKFNK	26.4	1039.53
3xFLAG::FBF-1 IP	Protein RPL-28 [Caenorhabditis elegans]	13725.1	5	5	0.468	SDALVWQVIR	63.4	1186.66
3xFLAG::FBF-1 IP	Protein RPL-28 [Caenorhabditis elegans]	13725.1	5	5	0.468	YSGLANK	25	752.394
3xFLAG::FBF-1 IP	Protein H28O16.1, isoform a [Caenorhabditis elegans]	55021.3	3	3	0.0539	APGIIPR	26.7	723.451
3xFLAG::FBF-1 IP	Protein H28O16.1, isoform a [Caenorhabditis elegans]	55021.3	3	3	0.0539	LSVREPMVTGVK	39.7	1315.74
3xFLAG::FBF-1 IP	Protein H28O16.1, isoform a [Caenorhabditis elegans]	55021.3	3	3	0.0539	VLSIGDGIAR	25.2	1000.58
3xFLAG::FBF-1 IP	Protein RPL-4 [Caenorhabditis elegans]	38659.5	2	2	0.0928	LGPVVIYGQDAECAR	63.2	1647.82
3xFLAG::FBF-1 IP	Protein RPL-4 [Caenorhabditis elegans]	38659.5	2	2	0.0928	TPIRPDLVSFIADQVRR	26.1	1983.11
3xFLAG::FBF-1 IP	Protein LEV-11, isoform a [Caenorhabditis elegans]	33003.7	3	3	0.176	IATEKLEEATHNVDESER	38.9	2070.99
3xFLAG::FBF-1 IP	Protein LEV-11, isoform a [Caenorhabditis elegans]	33003.7	3	3	0.176	MTLLEEELERAEER	25.5	1747.85
3xFLAG::FBF-1 IP	Protein LEV-11, isoform a [Caenorhabditis elegans]	33003.7	3	3	0.176	YKTISEELDSTFQELSGY	78.8	2109.99
3xFLAG::FBF-1 IP	Protein K12H4.7, isoform a [Caenorhabditis elegans]	52528.3	2	2	0.0275	ISDVLDGWLHAN	48.4	1339.66
3xFLAG::FBF-1 IP	Protein K12H4.7, isoform a [Caenorhabditis elegans]	52528.3	2	2	0.0275	QRISDVLDGWLHAN	27.4	1623.82
3xFLAG::FBF-1 IP	Protein RPL-16 [Caenorhabditis elegans]	22995	2	2	0.124	AYEGVPAKYQK	27	1253.65
3xFLAG::FBF-1 IP	Protein RPL-16 [Caenorhabditis elegans]	22995	2	2	0.124	IAQYQKIIEALGYN	22.4	1623.87
N2 Neg Ctrl IP	Protein F15G9.1, isoform c [Caenorhabditis elegans]	30694.2	2	2	0.0827	RVSDLIAR	31.8	929.553
N2 Neg Ctrl IP	Protein F15G9.1, isoform c [Caenorhabditis elegans]	30694.2	2	2	0.0827	YGSGWDYSSSYSSSR	94.2	1688.68
N2 Neg Ctrl IP	Protein TNT-2, isoform a [Caenorhabditis elegans]	36954.4	8	9	0.224	AQDVSTLMPNDLKER	63.8	1716.86
N2 Neg Ctrl IP	Protein TNT-2, isoform a [Caenorhabditis elegans]	36954.4	8	9	0.224	GLDPEEAASSVHPPK	33.7	1533.75
N2 Neg Ctrl IP	Protein TNT-2, isoform a [Caenorhabditis elegans]	36954.4	8	9	0.224	GLDPEEAASSVHPPKITTASK	18.9	2135.1
N2 Neg Ctrl IP	Protein TNT-2, isoform a [Caenorhabditis elegans]	36954.4	8	9	0.224	IKGIHAR	38.2	794.5
N2 Neg Ctrl IP	Protein TNT-2, isoform a [Caenorhabditis elegans]	36954.4	8	9	0.224	ITTASKFDR	49.3	1038.56
N2 Neg Ctrl IP	Protein TNT-2, isoform a [Caenorhabditis elegans]	36954.4	8	9	0.224	NFTVSNKGDQAANFGNLAQGAK	97.3	2252.11
N2 Neg Ctrl IP	Protein TNT-2, isoform a [Caenorhabditis elegans]	36954.4	8	9	0.224	QQMMAGSFAGAAVGAPGGK	117	1735.83
N2 Neg Ctrl IP	Protein TNT-2, isoform a [Caenorhabditis elegans]	36954.4	8	9	0.224	RAFLNVVCK	26.9	1106.61
N2 Neg Ctrl IP	Protein RLA-1 [Caenorhabditis elegans]	11284	2	3	0.532	AANVEFEPYWPGLFAK	50.7	1838.91
N2 Neg Ctrl IP	Protein RLA-1 [Caenorhabditis elegans]	11284	2	3	0.532	ALEGVDVKNLITSVSSGAGSGPAPAAAAAAPAAGGAAPAAETK	61.7	3745.92
N2 Neg Ctrl IP	Protein GSNL-1 [Caenorhabditis elegans]	54592.9	2	2	0.0505	AKNIADHER	26.1	1053.54
N2 Neg Ctrl IP	Protein GSNL-1 [Caenorhabditis elegans]	54592.9	2	2	0.0505	FFPSWDDNLFKNEVR	50	1913.92
N2 Neg Ctrl IP	Protein ATP-2 [Caenorhabditis elegans]	57527.3	1	1	0.0279	VSLVYGQMNEPPGAR	17.5	1617.81
N2 Neg Ctrl IP	Protein EEF-2, isoform a [Caenorhabditis elegans]	94797.6	1	1	0.0305	LLEPVYLVEIQCPEAAVGGIYGVLNR	20.8	2872.53
N2 Neg Ctrl IP	Protein UNC-15, isoform b [Caenorhabditis elegans]	63703.5	4	8	0.0922	QLAESESVTMQNLQR	106	1733.85
N2 Neg Ctrl IP	Protein UNC-15, isoform b [Caenorhabditis elegans]	63703.5	4	8	0.0922	RQLAESESVTMQNLQR	85.2	1889.95
N2 Neg Ctrl IP	Protein UNC-15, isoform b [Caenorhabditis elegans]	63703.5	4	8	0.0922	SSSKIFVTEDDY	78.7	1390.64
N2 Neg Ctrl IP	Protein UNC-15, isoform b [Caenorhabditis elegans]	63703.5	4	8	0.0922	YQHELEDAEGRADQAESSLHLIR	33.8	2667.28
N2 Neg Ctrl IP	Protein ACT-3 [Caenorhabditis elegans]	41796.6	2	13	0.54	AGFAGDDAPR	80.9	976.448
N2 Neg Ctrl IP	Protein ACT-3 [Caenorhabditis elegans]	41796.6	2	13	0.54	AGFAGDDAPRAVFPSIVGRPR	57.3	2156.14
N2 Neg Ctrl IP	Protein ACT-3 [Caenorhabditis elegans]	41796.6	2	13	0.54	AVFPSIVGRPR	51.8	1198.71
N2 Neg Ctrl IP	Protein ACT-3 [Caenorhabditis elegans]	41796.6	2	13	0.54	CDIDIRK	32.9	919.467
N2 Neg Ctrl IP	Protein ACT-3 [Caenorhabditis elegans]	41796.6	2	13	0.54	CPEAMFQPSFLGMESAGIHETSYNSIMK	60.8	3162.4
N2 Neg Ctrl IP	Protein ACT-3 [Caenorhabditis elegans]	41796.6	2	13	0.54	DLYANTVLSGGTTMYPGIADR	95	2215.07
N2 Neg Ctrl IP	Protein ACT-3 [Caenorhabditis elegans]	41796.6	2	13	0.54	DLYANTVLSGGTTMYPGIADRMQK	65.3	2602.26
N2 Neg Ctrl IP	Protein ACT-3 [Caenorhabditis elegans]	41796.6	2	13	0.54	DSYVGDEAQSK	57.3	1198.52
N2 Neg Ctrl IP	Protein ACT-3 [Caenorhabditis elegans]	41796.6	2	13	0.54	DSYVGDEAQSKR	62.5	1354.62
N2 Neg Ctrl IP	Protein ACT-3 [Caenorhabditis elegans]	41796.6	2	13	0.54	EITALAPSTMK	47.5	1161.62
N2 Neg Ctrl IP	Protein ACT-3 [Caenorhabditis elegans]	41796.6	2	13	0.54	EKLCYVALDFEQEMATAASSSSLEK	69.8	2807.31
N2 Neg Ctrl IP	Protein ACT-3 [Caenorhabditis elegans]	41796.6	2	13	0.54	FRCPEAMFQPSFLGMESAGIHETSYNSIMK	76.4	3465.57
N2 Neg Ctrl IP	Protein ACT-3 [Caenorhabditis elegans]	41796.6	2	13	0.54	HQGVMVGMGQK	70.8	1171.57
N2 Neg Ctrl IP	Protein ACT-3 [Caenorhabditis elegans]	41796.6	2	13	0.54	HQGVMVGMGQKDSYVGDEAQSK	79.6	2351.08
N2 Neg Ctrl IP	Protein ACT-3 [Caenorhabditis elegans]	41796.6	2	13	0.54	IWHHTFYNELR	35.1	1515.75
N2 Neg Ctrl IP	Protein ACT-3 [Caenorhabditis elegans]	41796.6	2	13	0.54	KDLYANTVLSGGTTMYPGIADR	59.8	2343.17
N2 Neg Ctrl IP	Protein ACT-3 [Caenorhabditis elegans]	41796.6	2	13	0.54	LCYVALDFEQEMATAASSSSLEK	108	2550.17
N2 Neg Ctrl IP	Protein ACT-3 [Caenorhabditis elegans]	41796.6	2	13	0.54	LCYVALDFEQEMATAASSSSLEKSYELPDGQVITVGNER	106	4308.03
N2 Neg Ctrl IP	Protein ACT-3 [Caenorhabditis elegans]	41796.6	2	13	0.54	LDLAGRDLTDYLMK	18.9	1623.84
N2 Neg Ctrl IP	Protein ACT-3 [Caenorhabditis elegans]	41796.6	2	13	0.54	MQKEITALAPSTMK	80.5	1548.81
N2 Neg Ctrl IP	Protein ACT-3 [Caenorhabditis elegans]	41796.6	2	13	0.54	SYELPDGQVITVGNER	94.5	1776.88
N2 Neg Ctrl IP	Protein ACT-3 [Caenorhabditis elegans]	41796.6	2	13	0.54	SYELPDGQVITVGNERFR	38.2	2080.05
N2 Neg Ctrl IP	Protein ACT-3 [Caenorhabditis elegans]	41796.6	2	13	0.54	VAPEEHPVLLTEAPLNPK	66.9	1954.06
N2 Neg Ctrl IP	Protein ACT-3 [Caenorhabditis elegans]	41796.6	2	13	0.54	VAPEEHPVLLTEAPLNPKANR	35	2296.23
N2 Neg Ctrl IP	Protein MIF-4 [Caenorhabditis elegans]	13808.3	1	1	0.116	SFATQGKTIASLYE	29.6	1515.77
N2 Neg Ctrl IP	Protein EEF-1A.1 [Caenorhabditis elegans]	50668.6	3	4	0.0972	FTEITNEVSGFIK	62.8	1484.76
N2 Neg Ctrl IP	Protein EEF-1A.1 [Caenorhabditis elegans]	50668.6	3	4	0.0972	SGDAGIVELIPTKPLCVESFTDYAPLGR	61.5	3005.53
N2 Neg Ctrl IP	Protein EEF-1A.1 [Caenorhabditis elegans]	50668.6	3	4	0.0972	SGDAGIVELIPTKPLCVESFTDYAPLGRFAVR	23.9	3478.8
N2 Neg Ctrl IP	Protein CPF-1 [Caenorhabditis elegans]	47962.1	11	13	0.384	AAAFNSDGSLVATGSADCSIK	61.2	2041.95
N2 Neg Ctrl IP	Protein CPF-1 [Caenorhabditis elegans]	47962.1	11	13	0.384	AAAFNSDGSLVATGSADCSIKIMDVER	61.3	2785.31
N2 Neg Ctrl IP	Protein CPF-1 [Caenorhabditis elegans]	47962.1	11	13	0.384	ALSCHPGGEFLLVATDHPTVR	28	2277.14
N2 Neg Ctrl IP	Protein CPF-1 [Caenorhabditis elegans]	47962.1	11	13	0.384	DSILISGSNDKTVK	27.3	1476.79
N2 Neg Ctrl IP	Protein CPF-1 [Caenorhabditis elegans]	47962.1	11	13	0.384	FWYRKPATNEH	39.2	1448.71
N2 Neg Ctrl IP	Protein CPF-1 [Caenorhabditis elegans]	47962.1	11	13	0.384	LLALGHTSACR	37.1	1198.64
N2 Neg Ctrl IP	Protein CPF-1 [Caenorhabditis elegans]	47962.1	11	13	0.384	LYNIETAQAYASANPDDQHTESVTDVHYSENAR	33.3	3709.66
N2 Neg Ctrl IP	Protein CPF-1 [Caenorhabditis elegans]	47962.1	11	13	0.384	RLLALGHTSACR	33.9	1354.74
N2 Neg Ctrl IP	Protein CPF-1 [Caenorhabditis elegans]	47962.1	11	13	0.384	TFVHSPSMPAFMTGSDDHRAR	21.8	2347.07
N2 Neg Ctrl IP	Protein CPF-1 [Caenorhabditis elegans]	47962.1	11	13	0.384	TLSEVYPVRALSCHPGGEFLLVATDHPTVR	24.1	3321.71
N2 Neg Ctrl IP	Protein CPF-1 [Caenorhabditis elegans]	47962.1	11	13	0.384	TLYDHVDDVNTVIFHPR	28.1	2041.01
N2 Neg Ctrl IP	Protein Y43F8B.1, isoform d [Caenorhabditis elegans]	76095.2	16	25	0.383	ANEDTAWIQQDQNGVLKQAVWGK	63.8	2600.27
N2 Neg Ctrl IP	Protein Y43F8B.1, isoform d [Caenorhabditis elegans]	76095.2	16	25	0.383	AQQAAALQAAAAR	91.9	1240.68
N2 Neg Ctrl IP	Protein Y43F8B.1, isoform d [Caenorhabditis elegans]	76095.2	16	25	0.383	AVILADDACWQTQR	103	1646.8
N2 Neg Ctrl IP	Protein Y43F8B.1, isoform d [Caenorhabditis elegans]	76095.2	16	25	0.383	KTEVPVQAQAQPAQSTVPQK	41.6	2135.15
N2 Neg Ctrl IP	Protein Y43F8B.1, isoform d [Caenorhabditis elegans]	76095.2	16	25	0.383	MERQWPPPPPQYQVVESSGEIETR	49.4	2841.35
N2 Neg Ctrl IP	Protein Y43F8B.1, isoform d [Caenorhabditis elegans]	76095.2	16	25	0.383	MLEAQQLAK	31.6	1031.56
N2 Neg Ctrl IP	Protein Y43F8B.1, isoform d [Caenorhabditis elegans]	76095.2	16	25	0.383	MLEAQQLAKAQQAAALQAAAAR	39.1	2253.21
N2 Neg Ctrl IP	Protein Y43F8B.1, isoform d [Caenorhabditis elegans]	76095.2	16	25	0.383	NQIQGPQPEQPKQATAVAPPTGK	25.4	2385.25
N2 Neg Ctrl IP	Protein Y43F8B.1, isoform d [Caenorhabditis elegans]	76095.2	16	25	0.383	RVPAEIQLPQVGK	28.6	1434.84
N2 Neg Ctrl IP	Protein Y43F8B.1, isoform d [Caenorhabditis elegans]	76095.2	16	25	0.383	SFGIRVAQTPQQAQQQVLSQIGNMAGQR	44.6	3041.57
N2 Neg Ctrl IP	Protein Y43F8B.1, isoform d [Caenorhabditis elegans]	76095.2	16	25	0.383	SGAIAQAQPAQQEIHAATGPK	32.7	2074.07
N2 Neg Ctrl IP	Protein Y43F8B.1, isoform d [Caenorhabditis elegans]	76095.2	16	25	0.383	TALRQTVQVQEQELAVGGHQAMSPIMAR	80.6	3049.57
N2 Neg Ctrl IP	Protein Y43F8B.1, isoform d [Caenorhabditis elegans]	76095.2	16	25	0.383	TKTQDWVPVNNEQNELQR	42	2199.08
N2 Neg Ctrl IP	Protein Y43F8B.1, isoform d [Caenorhabditis elegans]	76095.2	16	25	0.383	TQDWVPVNNEQNELQR	50.8	1969.94
N2 Neg Ctrl IP	Protein Y43F8B.1, isoform d [Caenorhabditis elegans]	76095.2	16	25	0.383	VAQAQNQAQVNQAAQDQAK	101	2011
N2 Neg Ctrl IP	Protein Y43F8B.1, isoform d [Caenorhabditis elegans]	76095.2	16	25	0.383	VQWNEFPEEPKYEIGAVPK	26.2	2260.13
N2 Neg Ctrl IP	Protein RPL-10 [Caenorhabditis elegans]	24749.4	1	1	0.0421	IRIFDLGNK	34.2	1075.63
N2 Neg Ctrl IP	Protein RPS-20 [Caenorhabditis elegans]	13234.8	2	2	0.265	LINLHAPAEVLR	32.7	1345.8
N2 Neg Ctrl IP	Protein RPS-20 [Caenorhabditis elegans]	13234.8	2	2	0.265	QITSISIEPGVDIEVTRAD	41	2043.06
N2 Neg Ctrl IP	Protein F40A3.6 [Caenorhabditis elegans]	30245.2	4	5	0.244	IIGSNFVQLTSRPK	57.2	1559.89
N2 Neg Ctrl IP	Protein F40A3.6 [Caenorhabditis elegans]	30245.2	4	5	0.244	SFQVYEPK	37.6	997.499
N2 Neg Ctrl IP	Protein F40A3.6 [Caenorhabditis elegans]	30245.2	4	5	0.244	SSSEYFAASYEAERER	38.7	1881.82
N2 Neg Ctrl IP	Protein F40A3.6 [Caenorhabditis elegans]	30245.2	4	5	0.244	TLIDYKDFDSSPLSPYLYQSHPYVR	44	3004.47
N2 Neg Ctrl IP	Protein ANT-1.1, isoform a [Caenorhabditis elegans]	33046.6	1	1	0.0533	FLIDLASGGTAAAVSK	73.4	1520.83
N2 Neg Ctrl IP	Protein ACT-5 [Caenorhabditis elegans]	41873.7	9	20	0.403	AGFAGDDAPR	80.9	976.448
N2 Neg Ctrl IP	Protein ACT-5 [Caenorhabditis elegans]	41873.7	9	20	0.403	AGFAGDDAPRAVFPSIVGRPR	57.3	2156.14
N2 Neg Ctrl IP	Protein ACT-5 [Caenorhabditis elegans]	41873.7	9	20	0.403	AVFPSIVGRPR	51.8	1198.71
N2 Neg Ctrl IP	Protein ACT-5 [Caenorhabditis elegans]	41873.7	9	20	0.403	CPEVLFQPAFIGMEGAGIHETTYQSIMK	30	3155.49
N2 Neg Ctrl IP	Protein ACT-5 [Caenorhabditis elegans]	41873.7	9	20	0.403	DSYVGDEAQSK	57.3	1198.52
N2 Neg Ctrl IP	Protein ACT-5 [Caenorhabditis elegans]	41873.7	9	20	0.403	DSYVGDEAQSKR	62.5	1354.62
N2 Neg Ctrl IP	Protein ACT-5 [Caenorhabditis elegans]	41873.7	9	20	0.403	EEEIAALVVDNGSGMCK	93.2	1822.82
N2 Neg Ctrl IP	Protein ACT-5 [Caenorhabditis elegans]	41873.7	9	20	0.403	EEEIAALVVDNGSGMCKAGFAGDDAPR	101	2779.27
N2 Neg Ctrl IP	Protein ACT-5 [Caenorhabditis elegans]	41873.7	9	20	0.403	FRCPEVLFQPAFIGMEGAGIHETTYQSIMK	57.9	3458.66
N2 Neg Ctrl IP	Protein ACT-5 [Caenorhabditis elegans]	41873.7	9	20	0.403	HQGVMVGMGQK	70.8	1171.57
N2 Neg Ctrl IP	Protein ACT-5 [Caenorhabditis elegans]	41873.7	9	20	0.403	HQGVMVGMGQKDSYVGDEAQSK	79.6	2351.08
N2 Neg Ctrl IP	Protein ACT-5 [Caenorhabditis elegans]	41873.7	9	20	0.403	IAPEEHPVLLTEAPLNPK	21	1968.08
N2 Neg Ctrl IP	Protein ACT-5 [Caenorhabditis elegans]	41873.7	9	20	0.403	IWHHTFYNELR	35.1	1515.75
N2 Neg Ctrl IP	Protein ACT-5 [Caenorhabditis elegans]	41873.7	9	20	0.403	LDLAGRDLTDYMMK	28.7	1641.8
N2 Neg Ctrl IP	Protein ACT-5 [Caenorhabditis elegans]	41873.7	9	20	0.403	MEEEIAALVVDNGSGMCK	35.8	1969.86
N2 Neg Ctrl IP	Protein ACT-5 [Caenorhabditis elegans]	41873.7	9	20	0.403	MEEEIAALVVDNGSGMCKAGFAGDDAPR	53.2	2926.3
N2 Neg Ctrl IP	Protein ACT-5 [Caenorhabditis elegans]	41873.7	9	20	0.403	SYELPDGQVITIGNER	64.8	1790.89
N2 Neg Ctrl IP	Protein MLC-7 [Caenorhabditis elegans]	17309.1	2	2	0.0784	ITVEEFIPIYK	22.6	1351.75
N2 Neg Ctrl IP	Protein MLC-7 [Caenorhabditis elegans]	17309.1	2	2	0.0784	ITVEEFIPIYKK	34.9	1479.85
N2 Neg Ctrl IP	Protein RPS-7 [Caenorhabditis elegans]	22058.4	3	3	0.242	LTGKDVTFEFPDPIF	20.2	1725.87
N2 Neg Ctrl IP	Protein RPS-7 [Caenorhabditis elegans]	22058.4	3	3	0.242	PEIIGKLLK	34.3	1010.66
N2 Neg Ctrl IP	Protein RPS-7 [Caenorhabditis elegans]	22058.4	3	3	0.242	TLTAVHDAWLDELVYPAEVVGRR	44.7	2610.37
N2 Neg Ctrl IP	Protein K12H4.7, isoform a [Caenorhabditis elegans]	52528.3	2	2	0.0275	ISDVLDGWLHAN	57.1	1339.66
N2 Neg Ctrl IP	Protein K12H4.7, isoform a [Caenorhabditis elegans]	52528.3	2	2	0.0275	QRISDVLDGWLHAN	32.4	1623.82
N2 Neg Ctrl IP	Protein HSP-1 [Caenorhabditis elegans]	69725.1	1	1	0.0188	ARFEELCADLFR	31.9	1526.74
N2 Neg Ctrl IP	Protein H28O16.1, isoform a [Caenorhabditis elegans]	55021.3	1	1	0.0223	LSVREPMVTGVK	19	1315.74
N2 Neg Ctrl IP	Protein UNC-87, isoform b [Caenorhabditis elegans]	41576.2	43	71	0.906	ETTKMVDSNHPDYSHECSIDQTTIPSQMGSNQYASQK	24.5	4215.82
N2 Neg Ctrl IP	Protein UNC-87, isoform b [Caenorhabditis elegans]	41576.2	43	71	0.906	FASQAGMIGFGTCR	86.3	1518.68
N2 Neg Ctrl IP	Protein UNC-87, isoform b [Caenorhabditis elegans]	41576.2	43	71	0.906	FASQAGMIGFGTCRNTTFEAEGGELPYEAMK	52.7	3370.52
N2 Neg Ctrl IP	Protein UNC-87, isoform b [Caenorhabditis elegans]	41576.2	43	71	0.906	FASQKGMTGFGTAR	59.7	1458.72
N2 Neg Ctrl IP	Protein UNC-87, isoform b [Caenorhabditis elegans]	41576.2	43	71	0.906	GMTGFGQPR	54	950.451
N2 Neg Ctrl IP	Protein UNC-87, isoform b [Caenorhabditis elegans]	41576.2	43	71	0.906	GMTGFGQPRWEVLDPSISWQNR	43.5	2561.24
N2 Neg Ctrl IP	Protein UNC-87, isoform b [Caenorhabditis elegans]	41576.2	43	71	0.906	GMTGFGSGR	36	869.394
N2 Neg Ctrl IP	Protein UNC-87, isoform b [Caenorhabditis elegans]	41576.2	43	71	0.906	GMTGFGSGRDVCR	16.8	1399.62
N2 Neg Ctrl IP	Protein UNC-87, isoform b [Caenorhabditis elegans]	41576.2	43	71	0.906	GMTGFGTAR	43.3	897.425
N2 Neg Ctrl IP	Protein UNC-87, isoform b [Caenorhabditis elegans]	41576.2	43	71	0.906	GMTGFGTARR	22.2	1053.53
N2 Neg Ctrl IP	Protein UNC-87, isoform b [Caenorhabditis elegans]	41576.2	43	71	0.906	IRMSEGIVR	33.4	1060.59
N2 Neg Ctrl IP	Protein UNC-87, isoform b [Caenorhabditis elegans]	41576.2	43	71	0.906	IWELEYPEEAEISLDR	47.1	1991.96
N2 Neg Ctrl IP	Protein UNC-87, isoform b [Caenorhabditis elegans]	41576.2	43	71	0.906	IWELEYPEEAEISLDRL	86.2	2105.04
N2 Neg Ctrl IP	Protein UNC-87, isoform b [Caenorhabditis elegans]	41576.2	43	71	0.906	KMTSFGAPR	52.7	994.514
N2 Neg Ctrl IP	Protein UNC-87, isoform b [Caenorhabditis elegans]	41576.2	43	71	0.906	LMTNFGTPR	59.7	1036.52
N2 Neg Ctrl IP	Protein UNC-87, isoform b [Caenorhabditis elegans]	41576.2	43	71	0.906	LQAGTNKYDSQK	48.7	1352.68
N2 Neg Ctrl IP	Protein UNC-87, isoform b [Caenorhabditis elegans]	41576.2	43	71	0.906	LQSGTNKYCSQR	27.4	1441.69
N2 Neg Ctrl IP	Protein UNC-87, isoform b [Caenorhabditis elegans]	41576.2	43	71	0.906	LQSGTNRFASQAGMIGFGTCR	73.9	2275.07
N2 Neg Ctrl IP	Protein UNC-87, isoform b [Caenorhabditis elegans]	41576.2	43	71	0.906	MPPTEDQVVAEEQPNATMETK	35.6	2346.05
N2 Neg Ctrl IP	Protein UNC-87, isoform b [Caenorhabditis elegans]	41576.2	43	71	0.906	MPPTEDQVVAEEQPNATMETKVTGQGQPK	73.9	3140.49
N2 Neg Ctrl IP	Protein UNC-87, isoform b [Caenorhabditis elegans]	41576.2	43	71	0.906	MSEGIVR	47.3	791.408
N2 Neg Ctrl IP	Protein UNC-87, isoform b [Caenorhabditis elegans]	41576.2	43	71	0.906	MTSFGAPR	37.9	866.419
N2 Neg Ctrl IP	Protein UNC-87, isoform b [Caenorhabditis elegans]	41576.2	43	71	0.906	MVDSKHPEYDHEKPDQSEIPLQSGTNK	28.1	3109.45
N2 Neg Ctrl IP	Protein UNC-87, isoform b [Caenorhabditis elegans]	41576.2	43	71	0.906	MVDSNHPDYSHECSIDQTTIPSQMGSNQYASQK	31.3	3755.6
N2 Neg Ctrl IP	Protein UNC-87, isoform b [Caenorhabditis elegans]	41576.2	43	71	0.906	MVDSNHPDYSHECSIDQTTIPSQMGSNQYASQKGMTGFGQPR	57.5	4687.03
N2 Neg Ctrl IP	Protein UNC-87, isoform b [Caenorhabditis elegans]	41576.2	43	71	0.906	NTTFEAEGGELPYEAMK	94.3	1886.85
N2 Neg Ctrl IP	Protein UNC-87, isoform b [Caenorhabditis elegans]	41576.2	43	71	0.906	NTTFEAEGGELPYEAMKVSETIIPSQAGWNK	48.6	3398.61
N2 Neg Ctrl IP	Protein UNC-87, isoform b [Caenorhabditis elegans]	41576.2	43	71	0.906	PPTEDQVVAEEQPNATMETK	64.2	2214.02
N2 Neg Ctrl IP	Protein UNC-87, isoform b [Caenorhabditis elegans]	41576.2	43	71	0.906	PPTEDQVVAEEQPNATMETKVTGQGQPK	109	3009.45
N2 Neg Ctrl IP	Protein UNC-87, isoform b [Caenorhabditis elegans]	41576.2	43	71	0.906	QTDGIIPSQAGWNK	35.1	1514.76
N2 Neg Ctrl IP	Protein UNC-87, isoform b [Caenorhabditis elegans]	41576.2	43	71	0.906	QTDGIIPSQAGWNKGDSQK	82.8	2029.99
N2 Neg Ctrl IP	Protein UNC-87, isoform b [Caenorhabditis elegans]	41576.2	43	71	0.906	RIWELEYPEEAEISLDR	53.5	2148.06
N2 Neg Ctrl IP	Protein UNC-87, isoform b [Caenorhabditis elegans]	41576.2	43	71	0.906	SENLQEIPEDIANRTHGEVR	42	2307.13
N2 Neg Ctrl IP	Protein UNC-87, isoform b [Caenorhabditis elegans]	41576.2	43	71	0.906	SQGMVRLQSGTNR	51.4	1433.73
N2 Neg Ctrl IP	Protein UNC-87, isoform b [Caenorhabditis elegans]	41576.2	43	71	0.906	VAQNPADLAELPEEK	64.3	1623.82
N2 Neg Ctrl IP	Protein UNC-87, isoform b [Caenorhabditis elegans]	41576.2	43	71	0.906	VAQNPADLAELPEEKIR	67.2	1893.01
N2 Neg Ctrl IP	Protein UNC-87, isoform b [Caenorhabditis elegans]	41576.2	43	71	0.906	VKSENLQEIPEDIANR	67.9	1855.94
N2 Neg Ctrl IP	Protein UNC-87, isoform b [Caenorhabditis elegans]	41576.2	43	71	0.906	VSETIIPSQAGWNK	28.8	1529.8
N2 Neg Ctrl IP	Protein UNC-87, isoform b [Caenorhabditis elegans]	41576.2	43	71	0.906	VSETIIPSQAGWNKGDSQK	62.9	2045.03
N2 Neg Ctrl IP	Protein UNC-87, isoform b [Caenorhabditis elegans]	41576.2	43	71	0.906	WEVLDPSISWQNR	42.6	1629.8
N2 Neg Ctrl IP	Protein UNC-87, isoform b [Caenorhabditis elegans]	41576.2	43	71	0.906	WEVLDPSISWQNRK	60	1757.9
N2 Neg Ctrl IP	Protein UNC-87, isoform b [Caenorhabditis elegans]	41576.2	43	71	0.906	WTLAQLR	35.8	887.51
N2 Neg Ctrl IP	Protein UNC-87, isoform b [Caenorhabditis elegans]	41576.2	43	71	0.906	WTLAQLRQTDGIIPSQAGWNK	36.9	2383.25
N2 Neg Ctrl IP	Protein RPS-19 [Caenorhabditis elegans]	16322.2	1	1	0.123	LGVNKELAPVDPDWFYTR	22.6	2120.08
N2 Neg Ctrl IP	Protein RPS-2 [Caenorhabditis elegans]	28960.9	2	2	0.0662	CASVMVR	44.5	822.396
N2 Neg Ctrl IP	Protein RPS-2 [Caenorhabditis elegans]	28960.9	2	2	0.0662	GSTATLGNFAK	25.4	1066.55
N2 Neg Ctrl IP	Protein MLC-2 [Caenorhabditis elegans]	18604.4	4	5	0.353	AFAHLITTGAQDELASA	59.5	1715.86
N2 Neg Ctrl IP	Protein MLC-2 [Caenorhabditis elegans]	18604.4	4	5	0.353	GKPPIEGGEVDYKAFAHLITTGAQDELASA	47.9	3085.55
N2 Neg Ctrl IP	Protein MLC-2 [Caenorhabditis elegans]	18604.4	4	5	0.353	LTGTDPEATIVGAFAMFDK	65.4	1983.97
N2 Neg Ctrl IP	Protein MLC-2 [Caenorhabditis elegans]	18604.4	4	5	0.353	SGSEAAQFDQK	60.6	1167.53
N2 Neg Ctrl IP	Protein HPO-34, isoform a [Caenorhabditis elegans]	85641.1	3	3	0.0712	LFENYGPAHLPEYASNPSAYIH	43	2491.16
N2 Neg Ctrl IP	Protein HPO-34, isoform a [Caenorhabditis elegans]	85641.1	3	3	0.0712	SNTASTYQSR	25.5	1114.51
N2 Neg Ctrl IP	Protein HPO-34, isoform a [Caenorhabditis elegans]	85641.1	3	3	0.0712	SSSVSTVSAPILVGGNIAVPTPR	34.2	2209.22
N2 Neg Ctrl IP	Protein RPL-16 [Caenorhabditis elegans]	22995	2	2	0.124	AYEGVPAKYQK	40.4	1253.65
N2 Neg Ctrl IP	Protein RPL-16 [Caenorhabditis elegans]	22995	2	2	0.124	IAQYQKIIEALGYN	52.8	1623.87
N2 Neg Ctrl IP	Protein SPC-1, isoform a [Caenorhabditis elegans]	282305	2	2	0.0119	MKPYMDAISGR	18.7	1268.61
N2 Neg Ctrl IP	Protein SPC-1, isoform a [Caenorhabditis elegans]	282305	2	2	0.0119	SIQGGLDYEQFVHALFQS	38.4	2038.99
N2 Neg Ctrl IP	Protein RPL-21 [Caenorhabditis elegans]	18310.9	2	2	0.211	GAHTVTTQNNEPELLAPLRFEIVA	37.6	2620.37
N2 Neg Ctrl IP	Protein RPL-21 [Caenorhabditis elegans]	18310.9	2	2	0.211	GAVGIIVNKR	48.9	1026.64
N2 Neg Ctrl IP	Protein HSP-12.2 [Caenorhabditis elegans]	12264.4	1	1	0.136	SHLATRGVLTITASK	18.8	1554.9
N2 Neg Ctrl IP	Protein KETN-1, isoform e [Caenorhabditis elegans]	554864	68	94	0.25	AAILGDTQHEQSWQR	82.8	1739.85
N2 Neg Ctrl IP	Protein KETN-1, isoform e [Caenorhabditis elegans]	554864	68	94	0.25	AENSLGQAETVATIR	83	1559.8
N2 Neg Ctrl IP	Protein KETN-1, isoform e [Caenorhabditis elegans]	554864	68	94	0.25	AFNKLGESENQATIIIVPK	59.1	2072.14
N2 Neg Ctrl IP	Protein KETN-1, isoform e [Caenorhabditis elegans]	554864	68	94	0.25	AIHDFGFVVLQLTPAEPQDSGTWTCR	59.2	2945.43
N2 Neg Ctrl IP	Protein KETN-1, isoform e [Caenorhabditis elegans]	554864	68	94	0.25	AKAVEILEDNLR	34.1	1370.76
N2 Neg Ctrl IP	Protein KETN-1, isoform e [Caenorhabditis elegans]	554864	68	94	0.25	AQSPIEPMESQELIQK	30.5	1843.91
N2 Neg Ctrl IP	Protein KETN-1, isoform e [Caenorhabditis elegans]	554864	68	94	0.25	ARLNVNLQK	34	1055.63
N2 Neg Ctrl IP	Protein KETN-1, isoform e [Caenorhabditis elegans]	554864	68	94	0.25	ASSVANLVLTPR	81.3	1227.71
N2 Neg Ctrl IP	Protein KETN-1, isoform e [Caenorhabditis elegans]	554864	68	94	0.25	AVEILEDNLR	65.2	1171.63
N2 Neg Ctrl IP	Protein KETN-1, isoform e [Caenorhabditis elegans]	554864	68	94	0.25	AVNRVGEAVTSTK	32.8	1331.73
N2 Neg Ctrl IP	Protein KETN-1, isoform e [Caenorhabditis elegans]	554864	68	94	0.25	AVSAFGEAATSCTVK	96.1	1498.72
N2 Neg Ctrl IP	Protein KETN-1, isoform e [Caenorhabditis elegans]	554864	68	94	0.25	AWNDSGNAVTSANVGVQGSEGLLLDTSHPASLQK	89.6	3423.68
N2 Neg Ctrl IP	Protein KETN-1, isoform e [Caenorhabditis elegans]	554864	68	94	0.25	AWNTQGEASTSATVTTAGYEK	96.8	2173
N2 Neg Ctrl IP	Protein KETN-1, isoform e [Caenorhabditis elegans]	554864	68	94	0.25	DAILGDVQHQESWKR	23.3	1783.86
N2 Neg Ctrl IP	Protein KETN-1, isoform e [Caenorhabditis elegans]	554864	68	94	0.25	FIQQLTSPGSLVENQPAHFEATVEPVDDPTLTINWFLNGEPMSASSR	25.1	5171.49
N2 Neg Ctrl IP	Protein KETN-1, isoform e [Caenorhabditis elegans]	554864	68	94	0.25	FLSQIQPFHCEQELGRSFFEAR	29.2	2726.31
N2 Neg Ctrl IP	Protein KETN-1, isoform e [Caenorhabditis elegans]	554864	68	94	0.25	FMPARNFDYVNLDILALYGEDSGVYTCK	24.3	3272.53
N2 Neg Ctrl IP	Protein KETN-1, isoform e [Caenorhabditis elegans]	554864	68	94	0.25	FRQEYEFGNAILTIVHVLPHDSGVYTCR	28.2	3321.65
N2 Neg Ctrl IP	Protein KETN-1, isoform e [Caenorhabditis elegans]	554864	68	94	0.25	FSAEVDGNPEPTVQWQFK	33.3	2078.98
N2 Neg Ctrl IP	Protein KETN-1, isoform e [Caenorhabditis elegans]	554864	68	94	0.25	FSLNVLQAK	52.7	1019.59
N2 Neg Ctrl IP	Protein KETN-1, isoform e [Caenorhabditis elegans]	554864	68	94	0.25	FSNIISTDAGIYEIVAKNGVGEAR	30.4	2525.29
N2 Neg Ctrl IP	Protein KETN-1, isoform e [Caenorhabditis elegans]	554864	68	94	0.25	FTSQIQPIVVDEGKGAQFSAQFSGFPDPTIR	25.6	3368.68
N2 Neg Ctrl IP	Protein KETN-1, isoform e [Caenorhabditis elegans]	554864	68	94	0.25	GAQAPAGTHLDLPNFHSDLR	18.2	2118.04
N2 Neg Ctrl IP	Protein KETN-1, isoform e [Caenorhabditis elegans]	554864	68	94	0.25	GGSASYQSSDKAAADSPHFIAK	27.5	2196.02
N2 Neg Ctrl IP	Protein KETN-1, isoform e [Caenorhabditis elegans]	554864	68	94	0.25	GTIYTDSQHPESWQKIQVLEAPR	50.2	2684.33
N2 Neg Ctrl IP	Protein KETN-1, isoform e [Caenorhabditis elegans]	554864	68	94	0.25	HTGVYSCK	26.8	951.435
N2 Neg Ctrl IP	Protein KETN-1, isoform e [Caenorhabditis elegans]	554864	68	94	0.25	IKTINSFGYVVLEISPTYPEDNGEYICR	55.1	3278.59
N2 Neg Ctrl IP	Protein KETN-1, isoform e [Caenorhabditis elegans]	554864	68	94	0.25	IQEIEAPKPAPQEVPDLPHQPPAFVK	48.7	2875.54
N2 Neg Ctrl IP	Protein KETN-1, isoform e [Caenorhabditis elegans]	554864	68	94	0.25	IQEIEAPRAPGAEPEGPVYEKPSFVQPLQSVGDLPEGSVALLEAR	39.9	4772.43
N2 Neg Ctrl IP	Protein KETN-1, isoform e [Caenorhabditis elegans]	554864	68	94	0.25	IQELEAIDKYAR	21	1448.77
N2 Neg Ctrl IP	Protein KETN-1, isoform e [Caenorhabditis elegans]	554864	68	94	0.25	IRTIHDFGYVGLEFLHIHPEDTGTYTCK	61.9	3319.62
N2 Neg Ctrl IP	Protein KETN-1, isoform e [Caenorhabditis elegans]	554864	68	94	0.25	ISCTNEFGVATLLIK	84.1	1665.89
N2 Neg Ctrl IP	Protein KETN-1, isoform e [Caenorhabditis elegans]	554864	68	94	0.25	ISDAGEVVAIAR	102	1200.66
N2 Neg Ctrl IP	Protein KETN-1, isoform e [Caenorhabditis elegans]	554864	68	94	0.25	IWNPEGEAVSSATLK	60.4	1601.82
N2 Neg Ctrl IP	Protein KETN-1, isoform e [Caenorhabditis elegans]	554864	68	94	0.25	LGESENQATIIIVPK	57.6	1611.9
N2 Neg Ctrl IP	Protein KETN-1, isoform e [Caenorhabditis elegans]	554864	68	94	0.25	LIPVNDPTMR	29.7	1155.62
N2 Neg Ctrl IP	Protein KETN-1, isoform e [Caenorhabditis elegans]	554864	68	94	0.25	LQLTANDIYNESDK	86.7	1623.79
N2 Neg Ctrl IP	Protein KETN-1, isoform e [Caenorhabditis elegans]	554864	68	94	0.25	LQVQWIR	39.7	942.552
N2 Neg Ctrl IP	Protein KETN-1, isoform e [Caenorhabditis elegans]	554864	68	94	0.25	LSYVELQKPQFK	18.5	1479.82
N2 Neg Ctrl IP	Protein KETN-1, isoform e [Caenorhabditis elegans]	554864	68	94	0.25	LTCTPKEGIISATQLPER	26.5	2014.06
N2 Neg Ctrl IP	Protein KETN-1, isoform e [Caenorhabditis elegans]	554864	68	94	0.25	LTTDFGYISLDIAHTVPEDSGVYSVK	22.1	2827.4
N2 Neg Ctrl IP	Protein KETN-1, isoform e [Caenorhabditis elegans]	554864	68	94	0.25	LVIEWFHNGQPVNHTNR	34.9	2061.04
N2 Neg Ctrl IP	Protein KETN-1, isoform e [Caenorhabditis elegans]	554864	68	94	0.25	LVPVNDPNLRVQWFYNDQPLMESNWISTSNDFGCVSLR	45.9	4511.15
N2 Neg Ctrl IP	Protein KETN-1, isoform e [Caenorhabditis elegans]	554864	68	94	0.25	MINDFGWVIMDIAQTEPR	65.6	2136.03
N2 Neg Ctrl IP	Protein KETN-1, isoform e [Caenorhabditis elegans]	554864	68	94	0.25	MINDFGWVIMDIAQTEPRDSGEWK	51.3	2838.32
N2 Neg Ctrl IP	Protein KETN-1, isoform e [Caenorhabditis elegans]	554864	68	94	0.25	MKAIHDFGFVVLQLTPAEPQDSGTWTCR	54	3204.56
N2 Neg Ctrl IP	Protein KETN-1, isoform e [Caenorhabditis elegans]	554864	68	94	0.25	NAAGEAVSTATIEVQGKEVILQDSLQPQSLDR	21.2	3367.73
N2 Neg Ctrl IP	Protein KETN-1, isoform e [Caenorhabditis elegans]	554864	68	94	0.25	NFDYVNLDILALYGEDSGVYTCKAVSAFGEAATSCTVK	40.7	4148.95
N2 Neg Ctrl IP	Protein KETN-1, isoform e [Caenorhabditis elegans]	554864	68	94	0.25	NGQPLPEASR	35.4	1069.53
N2 Neg Ctrl IP	Protein KETN-1, isoform e [Caenorhabditis elegans]	554864	68	94	0.25	NGVPLAHGSKYAIQQDFGICTLDVAYTYPEDEGVYQLR	33.2	4290.03
N2 Neg Ctrl IP	Protein KETN-1, isoform e [Caenorhabditis elegans]	554864	68	94	0.25	NIYWSEQGGAVQPK	54.4	1576.78
N2 Neg Ctrl IP	Protein KETN-1, isoform e [Caenorhabditis elegans]	554864	68	94	0.25	NSLGEAQTIANFTVLPR	63.5	1830.97
N2 Neg Ctrl IP	Protein KETN-1, isoform e [Caenorhabditis elegans]	554864	68	94	0.25	NTEGETISTATLDIFQNDDFRQTK	69	2744.3
N2 Neg Ctrl IP	Protein KETN-1, isoform e [Caenorhabditis elegans]	554864	68	94	0.25	QAPQFTIPLR	27.7	1170.66
N2 Neg Ctrl IP	Protein KETN-1, isoform e [Caenorhabditis elegans]	554864	68	94	0.25	QQQPTQVTNGGIKAANGSAK	0.25	2238.92
N2 Neg Ctrl IP	Protein KETN-1, isoform e [Caenorhabditis elegans]	554864	68	94	0.25	SILSDTAHPESLRR	26.8	1581.83
N2 Neg Ctrl IP	Protein KETN-1, isoform e [Caenorhabditis elegans]	554864	68	94	0.25	SLLLDTMHDASWKR	25	1672.85
N2 Neg Ctrl IP	Protein KETN-1, isoform e [Caenorhabditis elegans]	554864	68	94	0.25	SNVELVVGTEKVLYLEPHHPEGLER	26	2844.49
N2 Neg Ctrl IP	Protein KETN-1, isoform e [Caenorhabditis elegans]	554864	68	94	0.25	SRISDAGEVVAIAR	42	1443.79
N2 Neg Ctrl IP	Protein KETN-1, isoform e [Caenorhabditis elegans]	554864	68	94	0.25	STLDFGFACLDLLYALPDDTGEYHCVATNR	34.3	3434.57
N2 Neg Ctrl IP	Protein KETN-1, isoform e [Caenorhabditis elegans]	554864	68	94	0.25	TIHDFGYVGLEFLHIHPEDTGTYTCK	22.9	3050.44
N2 Neg Ctrl IP	Protein KETN-1, isoform e [Caenorhabditis elegans]	554864	68	94	0.25	TIHDFGYVGLEFLHIHPEDTGTYTCKATNLIGEATTDIFLECKPR	28.9	5181.5
N2 Neg Ctrl IP	Protein KETN-1, isoform e [Caenorhabditis elegans]	554864	68	94	0.25	TRHDFGYVALDILYAFAQDTGEWACVAR	97.7	3245.55
N2 Neg Ctrl IP	Protein KETN-1, isoform e [Caenorhabditis elegans]	554864	68	94	0.25	TSVQWYLNGNPLSASSR	45	1879.93
N2 Neg Ctrl IP	Protein KETN-1, isoform e [Caenorhabditis elegans]	554864	68	94	0.25	VKMINDFGWVIMDIAQTEPR	31.5	2364.17
N2 Neg Ctrl IP	Protein KETN-1, isoform e [Caenorhabditis elegans]	554864	68	94	0.25	VSANIAVIGHGSFIQQQQSGSQFGGTAYQSK	57.3	3195.58
N2 Neg Ctrl IP	Protein KETN-1, isoform e [Caenorhabditis elegans]	554864	68	94	0.25	VTPQTDPNLR	24.7	1140.6
N2 Neg Ctrl IP	Protein KETN-1, isoform e [Caenorhabditis elegans]	554864	68	94	0.25	VVGTPTPSLTWQK	35.6	1413.77
N2 Neg Ctrl IP	Protein RPS-24 [Caenorhabditis elegans]	14872.3	3	3	0.244	GFALVYDTIDFAK	62.3	1459.75
N2 Neg Ctrl IP	Protein RPS-24 [Caenorhabditis elegans]	14872.3	3	3	0.244	LYKTTPDTVIPFGFESK	20.9	1943.02
N2 Neg Ctrl IP	Protein RPS-24 [Caenorhabditis elegans]	14872.3	3	3	0.244	SKGFALVYDTIDFAK	24.3	1674.87
N2 Neg Ctrl IP	Protein UNC-27 [Caenorhabditis elegans]	27560.9	4	7	0.376	DAKAEDSAPAAVAPEAEPVAEEAEAEPEAEEEEGEEEEEE	31.6	4211.74
N2 Neg Ctrl IP	Protein UNC-27 [Caenorhabditis elegans]	27560.9	4	7	0.376	DVMEAIVNVK	37.6	1117.59
N2 Neg Ctrl IP	Protein UNC-27 [Caenorhabditis elegans]	27560.9	4	7	0.376	IYNDLWAR	34.7	1050.54
N2 Neg Ctrl IP	Protein UNC-27 [Caenorhabditis elegans]	27560.9	4	7	0.376	LTQLEEEKYDINYVVSQTEAEINSLTIEVNDLR	35.6	3868.93
N2 Neg Ctrl IP	Protein RPL-28 [Caenorhabditis elegans]	13725.1	4	4	0.214	AAAIVRSQVK	41.2	1042.64
N2 Neg Ctrl IP	Protein RPL-28 [Caenorhabditis elegans]	13725.1	4	4	0.214	NNSAFLR	50.8	821.426
N2 Neg Ctrl IP	Protein RPL-28 [Caenorhabditis elegans]	13725.1	4	4	0.214	SDALVWQVIR	68.4	1186.66
N2 Neg Ctrl IP	Protein RPL-28 [Caenorhabditis elegans]	13725.1	4	4	0.214	SDALVWQVIRNNSAFLR	30.4	1989.07
N2 Neg Ctrl IP	Protein RPS-8, isoform a [Caenorhabditis elegans]	23751.3	2	4	0.149	IVDTMYNATNNELVR	75.5	1768.85
N2 Neg Ctrl IP	Protein RPS-8, isoform a [Caenorhabditis elegans]	23751.3	2	4	0.149	TAAVDALLIEQFNTGR	53.4	1718.91
N2 Neg Ctrl IP	Protein Y38F1A.6 [Caenorhabditis elegans]	50507.6	1	1	0.0344	GVTLEIGYDVRNLGAK	1.71	1784.89
N2 Neg Ctrl IP	Protein MYO-5 [Caenorhabditis elegans]	227004	3	3	0.0253	GAFLDEDFAEE	30	1242.52
N2 Neg Ctrl IP	Protein MYO-5 [Caenorhabditis elegans]	227004	3	3	0.0253	GGSRGAFLDEDFAEE	61.7	1599.69
N2 Neg Ctrl IP	Protein MYO-5 [Caenorhabditis elegans]	227004	3	3	0.0253	LQEKEEEFENTR	51.1	1552.71
N2 Neg Ctrl IP	Protein MYO-5 [Caenorhabditis elegans]	227004	3	3	0.0253	TIESMQVSLETESR	80.2	1609.77
N2 Neg Ctrl IP	Protein MYO-5 [Caenorhabditis elegans]	227004	3	3	0.0253	TVRNNNSSR	19.4	1047.53
N2 Neg Ctrl IP	Protein TNT-4, isoform a [Caenorhabditis elegans]	43559.9	2	2	0.0951	KMDYEIQQELEAAEEEEDY	68.6	2361.99
N2 Neg Ctrl IP	Protein TNT-4, isoform a [Caenorhabditis elegans]	43559.9	2	2	0.0951	SIAEASTILPNDMK	46.5	1505.75
N2 Neg Ctrl IP	Protein VIT-5 [Caenorhabditis elegans]	186441	1	1	0.00561	SILNLFSLR	52.5	1062.63
N2 Neg Ctrl IP	Protein F46G10.1, isoform a [Caenorhabditis elegans]	20368.7	3	3	0.157	ANTNDIVDIRNSVNQIANNTYYNNGGR	38.6	3011.42
N2 Neg Ctrl IP	Protein F46G10.1, isoform a [Caenorhabditis elegans]	20368.7	3	3	0.157	NSVNQIANNTYYNNGGR	72.1	1899.86
N2 Neg Ctrl IP	Protein F46G10.1, isoform a [Caenorhabditis elegans]	20368.7	3	3	0.157	NSVNQIANNTYYNNGGRI	60.8	2012.94
N2 Neg Ctrl IP	Protein T25F10.6, isoform a [Caenorhabditis elegans]	44367.9	35	71	0.771	AAAPPASLKSPTPGR	27.7	1420.79
N2 Neg Ctrl IP	Protein T25F10.6, isoform a [Caenorhabditis elegans]	44367.9	35	71	0.771	ARASDGIVPLQSGTNK	68.8	1613.86
N2 Neg Ctrl IP	Protein T25F10.6, isoform a [Caenorhabditis elegans]	44367.9	35	71	0.771	ASDGIVPLQSGTNK	60.4	1386.72
N2 Neg Ctrl IP	Protein T25F10.6, isoform a [Caenorhabditis elegans]	44367.9	35	71	0.771	ASDGIVPLQSGTNKLASQAGMTGIGMPR	81.3	2757.4
N2 Neg Ctrl IP	Protein T25F10.6, isoform a [Caenorhabditis elegans]	44367.9	35	71	0.771	DVRGEYVR	36.1	993.511
N2 Neg Ctrl IP	Protein T25F10.6, isoform a [Caenorhabditis elegans]	44367.9	35	71	0.771	EADHANQTGMTAFGTPR	38.2	1803.81
N2 Neg Ctrl IP	Protein T25F10.6, isoform a [Caenorhabditis elegans]	44367.9	35	71	0.771	EGASQAGMTGFGAFR	30.8	1486.67
N2 Neg Ctrl IP	Protein T25F10.6, isoform a [Caenorhabditis elegans]	44367.9	35	71	0.771	EGASQAGMTGFGAFRNNTVAFMQAQDQR	63.2	2990.36
N2 Neg Ctrl IP	Protein T25F10.6, isoform a [Caenorhabditis elegans]	44367.9	35	71	0.771	FANQAGMTGFGMPR	102	1484.68
N2 Neg Ctrl IP	Protein T25F10.6, isoform a [Caenorhabditis elegans]	44367.9	35	71	0.771	FASQKGQSGFGAVR	50.5	1439.74
N2 Neg Ctrl IP	Protein T25F10.6, isoform a [Caenorhabditis elegans]	44367.9	35	71	0.771	GMTGFGVPRDVIDK	38.6	1491.76
N2 Neg Ctrl IP	Protein T25F10.6, isoform a [Caenorhabditis elegans]	44367.9	35	71	0.771	GQSGFGAVRDVNYK	36.9	1497.74
N2 Neg Ctrl IP	Protein T25F10.6, isoform a [Caenorhabditis elegans]	44367.9	35	71	0.771	GSTWLQSGTNK	61.3	1178.58
N2 Neg Ctrl IP	Protein T25F10.6, isoform a [Caenorhabditis elegans]	44367.9	35	71	0.771	GTGGASEVPEEK	60.3	1160.54
N2 Neg Ctrl IP	Protein T25F10.6, isoform a [Caenorhabditis elegans]	44367.9	35	71	0.771	GTGGASEVPEEKAR	66.2	1387.68
N2 Neg Ctrl IP	Protein T25F10.6, isoform a [Caenorhabditis elegans]	44367.9	35	71	0.771	KQQNYSSGKPSTIHTK	61.2	1803.93
N2 Neg Ctrl IP	Protein T25F10.6, isoform a [Caenorhabditis elegans]	44367.9	35	71	0.771	LASQAGMTGIGMPR	96.7	1389.7
N2 Neg Ctrl IP	Protein T25F10.6, isoform a [Caenorhabditis elegans]	44367.9	35	71	0.771	LASQAGMTGIGMPRIVDVR	35.9	1972.05
N2 Neg Ctrl IP	Protein T25F10.6, isoform a [Caenorhabditis elegans]	44367.9	35	71	0.771	LMRSEGIIPIQAGSNK	76.3	1713.93
N2 Neg Ctrl IP	Protein T25F10.6, isoform a [Caenorhabditis elegans]	44367.9	35	71	0.771	NNTVAFMQAQDQR	87.6	1522.71
N2 Neg Ctrl IP	Protein T25F10.6, isoform a [Caenorhabditis elegans]	44367.9	35	71	0.771	NNTVAFMQAQDQRSQGMIPYQMGVNFLESQAGK	43.2	3688.73
N2 Neg Ctrl IP	Protein T25F10.6, isoform a [Caenorhabditis elegans]	44367.9	35	71	0.771	QQNYSSGKPSTIHTK	32.3	1675.84
N2 Neg Ctrl IP	Protein T25F10.6, isoform a [Caenorhabditis elegans]	44367.9	35	71	0.771	QQNYSSGKPSTIHTKEK	64.7	1932.98
N2 Neg Ctrl IP	Protein T25F10.6, isoform a [Caenorhabditis elegans]	44367.9	35	71	0.771	QQVNFTPSIPQSVLR	53.4	1713.93
N2 Neg Ctrl IP	Protein T25F10.6, isoform a [Caenorhabditis elegans]	44367.9	35	71	0.771	QTSGWKEGASQAGMTGFGAFR	77.7	2190
N2 Neg Ctrl IP	Protein T25F10.6, isoform a [Caenorhabditis elegans]	44367.9	35	71	0.771	QVYTPFTDDTHEDLPADIAR	98.1	2304.08
N2 Neg Ctrl IP	Protein T25F10.6, isoform a [Caenorhabditis elegans]	44367.9	35	71	0.771	RPDVPFWTGQKEADHANQTGMTAFGTPR	43.8	3116.46
N2 Neg Ctrl IP	Protein T25F10.6, isoform a [Caenorhabditis elegans]	44367.9	35	71	0.771	SEGIIPIQAGSNK	66.8	1313.71
N2 Neg Ctrl IP	Protein T25F10.6, isoform a [Caenorhabditis elegans]	44367.9	35	71	0.771	SEGIIPIQAGSNKYASQK	79.1	1890.99
N2 Neg Ctrl IP	Protein T25F10.6, isoform a [Caenorhabditis elegans]	44367.9	35	71	0.771	SPTPGRQQVNFTPSIPQSVLR	31.8	2309.24
N2 Neg Ctrl IP	Protein T25F10.6, isoform a [Caenorhabditis elegans]	44367.9	35	71	0.771	SQGMIPYQMGVNFLESQAGK	83	2201.04
N2 Neg Ctrl IP	Protein T25F10.6, isoform a [Caenorhabditis elegans]	44367.9	35	71	0.771	SQGMIPYQMGVNFLESQAGKTGFGQPR	45	2928.41
N2 Neg Ctrl IP	Protein T25F10.6, isoform a [Caenorhabditis elegans]	44367.9	35	71	0.771	TGFGQPRQVYTPFTDDTHEDLPADIAR	40.5	3048.43
N2 Neg Ctrl IP	Protein T25F10.6, isoform a [Caenorhabditis elegans]	44367.9	35	71	0.771	TKGTGGASEVPEEK	27.6	1389.69
N2 Neg Ctrl IP	Protein T25F10.6, isoform a [Caenorhabditis elegans]	44367.9	35	71	0.771	TNDQDRDSQGFIHLQMGTNK	38.9	2305.06
N2 Neg Ctrl IP	Protein TNI-4 [Caenorhabditis elegans]	23060.8	2	2	0.17	LIDLESENYDVSYIVR	85.4	1927.96
N2 Neg Ctrl IP	Protein TNI-4 [Caenorhabditis elegans]	23060.8	2	2	0.17	QKDFEINELTIAVNDLR	33	2018.06
N2 Neg Ctrl IP	Protein UNC-89, isoform b [Caenorhabditis elegans]	824242	5	5	0.0104	CAVTGDPFPEIKWYR	34.5	1838.89
N2 Neg Ctrl IP	Protein UNC-89, isoform b [Caenorhabditis elegans]	824242	5	5	0.0104	NLEDRLITEGELTLMDAK	30.4	2061.05
N2 Neg Ctrl IP	Protein UNC-89, isoform b [Caenorhabditis elegans]	824242	5	5	0.0104	QTAVGSFSLTINDARQGDVGIYSCR	21.1	2715.32
N2 Neg Ctrl IP	Protein UNC-89, isoform b [Caenorhabditis elegans]	824242	5	5	0.0104	STSSEIIAGSESR	85.3	1323.64
N2 Neg Ctrl IP	Protein UNC-89, isoform b [Caenorhabditis elegans]	824242	5	5	0.0104	TQATAHVQMALGK	55.2	1355.71
N2 Neg Ctrl IP	Protein NMY-1 [Caenorhabditis elegans]	229375	20	29	0.149	AAVADPATLAAWAQR	85.6	1511.8
N2 Neg Ctrl IP	Protein NMY-1 [Caenorhabditis elegans]	229375	20	29	0.149	AKITELESGAQSR	82.8	1389.73
N2 Neg Ctrl IP	Protein NMY-1 [Caenorhabditis elegans]	229375	20	29	0.149	AQVQLEQITTDLSMER	88.4	1861.93
N2 Neg Ctrl IP	Protein NMY-1 [Caenorhabditis elegans]	229375	20	29	0.149	AVIQEQLQQESENSAELDDIRGR	60.5	2628.29
N2 Neg Ctrl IP	Protein NMY-1 [Caenorhabditis elegans]	229375	20	29	0.149	FESQMAEER	22.4	1126.48
N2 Neg Ctrl IP	Protein NMY-1 [Caenorhabditis elegans]	229375	20	29	0.149	FESQMAEERVAVQK	25.5	1651.81
N2 Neg Ctrl IP	Protein NMY-1 [Caenorhabditis elegans]	229375	20	29	0.149	FIVPDMR	34.3	877.46
N2 Neg Ctrl IP	Protein NMY-1 [Caenorhabditis elegans]	229375	20	29	0.149	GFDVPGSSDNLAREEENESNVSGSEHGMSVN	23.2	3250.38
N2 Neg Ctrl IP	Protein NMY-1 [Caenorhabditis elegans]	229375	20	29	0.149	IAQLEEELEEEQSNCELAIDKQR	57.4	2774.32
N2 Neg Ctrl IP	Protein NMY-1 [Caenorhabditis elegans]	229375	20	29	0.149	IQQELEDSSMELENVR	67.6	1919.9
N2 Neg Ctrl IP	Protein NMY-1 [Caenorhabditis elegans]	229375	20	29	0.149	ITELESGAQSR	79.4	1190.6
N2 Neg Ctrl IP	Protein NMY-1 [Caenorhabditis elegans]	229375	20	29	0.149	KAQVQLEQITTDLSMER	34.9	1990.03
N2 Neg Ctrl IP	Protein NMY-1 [Caenorhabditis elegans]	229375	20	29	0.149	LATAEGQIQELNEQIQEETRLK	28.8	2541.32
N2 Neg Ctrl IP	Protein NMY-1 [Caenorhabditis elegans]	229375	20	29	0.149	MITALDIDTNLYR	36.8	1538.79
N2 Neg Ctrl IP	Protein NMY-1 [Caenorhabditis elegans]	229375	20	29	0.149	NVQREADDLLDANEQLTR	25.6	2100.03
N2 Neg Ctrl IP	Protein NMY-1 [Caenorhabditis elegans]	229375	20	29	0.149	QGFPNRVPFQEFR	30.8	1621.82
N2 Neg Ctrl IP	Protein NMY-1 [Caenorhabditis elegans]	229375	20	29	0.149	QLDEAEDEMSRER	30	1607.7
N2 Neg Ctrl IP	Protein NMY-1 [Caenorhabditis elegans]	229375	20	29	0.149	SLEAELNDMRVQMEELEDNLQIAEDAR	63.7	3161.47
N2 Neg Ctrl IP	Protein NMY-1 [Caenorhabditis elegans]	229375	20	29	0.149	VIQYLAHVAGATR	75.7	1398.79
N2 Neg Ctrl IP	Protein NMY-1 [Caenorhabditis elegans]	229375	20	29	0.149	VQYLEDQLNVEGQEK	51.4	1791.88
N2 Neg Ctrl IP	Protein MYO-3 [Caenorhabditis elegans]	225515	36	47	0.216	AATAARPFDSKK	43.8	1262.69
N2 Neg Ctrl IP	Protein MYO-3 [Caenorhabditis elegans]	225515	36	47	0.216	ALQLKVQELTDTNEGLFAK	36.9	2118.14
N2 Neg Ctrl IP	Protein MYO-3 [Caenorhabditis elegans]	225515	36	47	0.216	ASASMAPPDGFPMVPSASSALIR	53.9	2260.11
N2 Neg Ctrl IP	Protein MYO-3 [Caenorhabditis elegans]	225515	36	47	0.216	ASGVIDSALVLNQLTCNGVLEGIRICR	74	2930.51
N2 Neg Ctrl IP	Protein MYO-3 [Caenorhabditis elegans]	225515	36	47	0.216	EKEEDSLNHETAISSLR	42.7	1957.95
N2 Neg Ctrl IP	Protein MYO-3 [Caenorhabditis elegans]	225515	36	47	0.216	FDSEGLNKLEEIEAAK	25.5	1792.9
N2 Neg Ctrl IP	Protein MYO-3 [Caenorhabditis elegans]	225515	36	47	0.216	FIRTHFSGSGK	23.7	1236.65
N2 Neg Ctrl IP	Protein MYO-3 [Caenorhabditis elegans]	225515	36	47	0.216	GGTLEEQIVQTNPVLEAFGNAK	62.1	2315.19
N2 Neg Ctrl IP	Protein MYO-3 [Caenorhabditis elegans]	225515	36	47	0.216	GGTLEEQIVQTNPVLEAFGNAKTVR	44.6	2671.41
N2 Neg Ctrl IP	Protein MYO-3 [Caenorhabditis elegans]	225515	36	47	0.216	HGDSVAELTEQLETLQKLK	66.4	2139.13
N2 Neg Ctrl IP	Protein MYO-3 [Caenorhabditis elegans]	225515	36	47	0.216	IASQEKVR	51.1	930.537
N2 Neg Ctrl IP	Protein MYO-3 [Caenorhabditis elegans]	225515	36	47	0.216	IIAQLEAR	48.9	913.547
N2 Neg Ctrl IP	Protein MYO-3 [Caenorhabditis elegans]	225515	36	47	0.216	IQEKEEEFENTR	51.1	1552.71
N2 Neg Ctrl IP	Protein MYO-3 [Caenorhabditis elegans]	225515	36	47	0.216	IRASASMAPPDGFPMVPSASSALIR	46.7	2529.3
N2 Neg Ctrl IP	Protein MYO-3 [Caenorhabditis elegans]	225515	36	47	0.216	KGGTLEEQIVQTNPVLEAFGNAK	59	2443.28
N2 Neg Ctrl IP	Protein MYO-3 [Caenorhabditis elegans]	225515	36	47	0.216	KIIAQLEAR	45.2	1041.64
N2 Neg Ctrl IP	Protein MYO-3 [Caenorhabditis elegans]	225515	36	47	0.216	LAENNSIIAK	61	1072.6
N2 Neg Ctrl IP	Protein MYO-3 [Caenorhabditis elegans]	225515	36	47	0.216	LAENNSIIAKLQR	32	1469.84
N2 Neg Ctrl IP	Protein MYO-3 [Caenorhabditis elegans]	225515	36	47	0.216	LEEAVQRGEIAR	22.1	1370.74
N2 Neg Ctrl IP	Protein MYO-3 [Caenorhabditis elegans]	225515	36	47	0.216	LIKELTAR	47.5	943.594
N2 Neg Ctrl IP	Protein MYO-3 [Caenorhabditis elegans]	225515	36	47	0.216	NAELEEELEAERNSR	37.7	1788.84
N2 Neg Ctrl IP	Protein MYO-3 [Caenorhabditis elegans]	225515	36	47	0.216	NAILQSEKDELAQQAEAAER	19.8	2214.1
N2 Neg Ctrl IP	Protein MYO-3 [Caenorhabditis elegans]	225515	36	47	0.216	QFESIIAEWK	48	1250.64
N2 Neg Ctrl IP	Protein MYO-3 [Caenorhabditis elegans]	225515	36	47	0.216	QISKLNAEIQQWK	60.9	1585.87
N2 Neg Ctrl IP	Protein MYO-3 [Caenorhabditis elegans]	225515	36	47	0.216	RHGDSVAELTEQLETLQK	40.1	2054.05
N2 Neg Ctrl IP	Protein MYO-3 [Caenorhabditis elegans]	225515	36	47	0.216	SGNPDAFENDPGFPFLGISR	18.6	2216.97
N2 Neg Ctrl IP	Protein MYO-3 [Caenorhabditis elegans]	225515	36	47	0.216	SLQDEMANQDEAVAK	45.1	1648.75
N2 Neg Ctrl IP	Protein MYO-3 [Caenorhabditis elegans]	225515	36	47	0.216	SLQDEMANQDEAVAKLNK	26	2019.97
N2 Neg Ctrl IP	Protein MYO-3 [Caenorhabditis elegans]	225515	36	47	0.216	SSSNARFL	39.8	881.447
N2 Neg Ctrl IP	Protein MYO-3 [Caenorhabditis elegans]	225515	36	47	0.216	STAGIMHMGEMKFK	22.1	1567.74
N2 Neg Ctrl IP	Protein MYO-3 [Caenorhabditis elegans]	225515	36	47	0.216	THFSGSGKLAGGDIEHYLLEK	31.9	2259.14
N2 Neg Ctrl IP	Protein MYO-3 [Caenorhabditis elegans]	225515	36	47	0.216	TIEVQYSELQTK	37.7	1438.74
N2 Neg Ctrl IP	Protein MYO-3 [Caenorhabditis elegans]	225515	36	47	0.216	TVRNNNSSR	19.4	1047.53
N2 Neg Ctrl IP	Protein MYO-3 [Caenorhabditis elegans]	225515	36	47	0.216	VISYFAIVGATQAASGKEAK	27.6	2011.09
N2 Neg Ctrl IP	Protein MYO-3 [Caenorhabditis elegans]	225515	36	47	0.216	VLTAQFEQAEERADIAENALSK	35.2	2433.23
N2 Neg Ctrl IP	Protein MYO-3 [Caenorhabditis elegans]	225515	36	47	0.216	VQELTDTNEGLFAK	53	1564.79
N2 Neg Ctrl IP	Protein LFI-1, isoform a [Caenorhabditis elegans]	273884	11	13	0.0684	FQSSANRVINFHTFVDGGAGYVDGVPGGTSVIGGGPSAQR	37.2	3979.93
N2 Neg Ctrl IP	Protein LFI-1, isoform a [Caenorhabditis elegans]	273884	11	13	0.0684	LGSNVLGIRNSYGDNSIDAIINGGSR	22	2662.35
N2 Neg Ctrl IP	Protein LFI-1, isoform a [Caenorhabditis elegans]	273884	11	13	0.0684	MLDDPTSNVMIFDNYDPGNTYITNHNVELWSPAR	34.3	3939.8
N2 Neg Ctrl IP	Protein LFI-1, isoform a [Caenorhabditis elegans]	273884	11	13	0.0684	MLDDPTSNVMIFDNYDPGNTYITNHNVELWSPARGK	48.2	4125.9
N2 Neg Ctrl IP	Protein LFI-1, isoform a [Caenorhabditis elegans]	273884	11	13	0.0684	MLDLWTELQRVR	29.3	1559.84
N2 Neg Ctrl IP	Protein LFI-1, isoform a [Caenorhabditis elegans]	273884	11	13	0.0684	MVAAELQAR	59.8	988.524
N2 Neg Ctrl IP	Protein LFI-1, isoform a [Caenorhabditis elegans]	273884	11	13	0.0684	NAAFSAGAGDGLGLYGLEDGGDVNRTTNNYEK	50.8	3247.48
N2 Neg Ctrl IP	Protein LFI-1, isoform a [Caenorhabditis elegans]	273884	11	13	0.0684	NRMLDDPTSNVMIFDNYDPGNTYITNHNVELWSPAR	64	4211.91
N2 Neg Ctrl IP	Protein LFI-1, isoform a [Caenorhabditis elegans]	273884	11	13	0.0684	NSYGDNSIDAIINGGSR	71.7	1752.81
N2 Neg Ctrl IP	Protein LFI-1, isoform a [Caenorhabditis elegans]	273884	11	13	0.0684	SVGFYPR	31.9	825.425
N2 Neg Ctrl IP	Protein LFI-1, isoform a [Caenorhabditis elegans]	273884	11	13	0.0684	VINFHTFVDGGAGYVDGVPGGTSVIGGGPSAQR	38.8	3189.56
N2 Neg Ctrl IP	Protein ACT-4, isoform a [Caenorhabditis elegans]	40427.2	24	69	0.54	AGFAGDDAPR	80.9	976.448
N2 Neg Ctrl IP	Protein ACT-4, isoform a [Caenorhabditis elegans]	40427.2	24	69	0.54	AGFAGDDAPRAVFPSIVGRPR	57.3	2156.14
N2 Neg Ctrl IP	Protein ACT-4, isoform a [Caenorhabditis elegans]	40427.2	24	69	0.54	AVFPSIVGRPR	51.8	1198.71
N2 Neg Ctrl IP	Protein ACT-4, isoform a [Caenorhabditis elegans]	40427.2	24	69	0.54	CDIDIRK	32.9	919.467
N2 Neg Ctrl IP	Protein ACT-4, isoform a [Caenorhabditis elegans]	40427.2	24	69	0.54	CPEALFQPSFLGMESAGIHETSYNSIMK	51.6	3144.45
N2 Neg Ctrl IP	Protein ACT-4, isoform a [Caenorhabditis elegans]	40427.2	24	69	0.54	DLYANTVLSGGTTMYPGIADR	95	2215.07
N2 Neg Ctrl IP	Protein ACT-4, isoform a [Caenorhabditis elegans]	40427.2	24	69	0.54	DLYANTVLSGGTTMYPGIADRMQK	65.3	2602.26
N2 Neg Ctrl IP	Protein ACT-4, isoform a [Caenorhabditis elegans]	40427.2	24	69	0.54	DSYVGDEAQSK	57.3	1198.52
N2 Neg Ctrl IP	Protein ACT-4, isoform a [Caenorhabditis elegans]	40427.2	24	69	0.54	DSYVGDEAQSKR	62.5	1354.62
N2 Neg Ctrl IP	Protein ACT-4, isoform a [Caenorhabditis elegans]	40427.2	24	69	0.54	EITALAPSTMK	47.5	1161.62
N2 Neg Ctrl IP	Protein ACT-4, isoform a [Caenorhabditis elegans]	40427.2	24	69	0.54	EKLCYVALDFEQEMATAASSSSLEK	69.8	2807.31
N2 Neg Ctrl IP	Protein ACT-4, isoform a [Caenorhabditis elegans]	40427.2	24	69	0.54	FRCPEALFQPSFLGMESAGIHETSYNSIMK	68.5	3447.62
N2 Neg Ctrl IP	Protein ACT-4, isoform a [Caenorhabditis elegans]	40427.2	24	69	0.54	HQGVMVGMGQK	70.8	1171.57
N2 Neg Ctrl IP	Protein ACT-4, isoform a [Caenorhabditis elegans]	40427.2	24	69	0.54	HQGVMVGMGQKDSYVGDEAQSK	79.6	2351.08
N2 Neg Ctrl IP	Protein ACT-4, isoform a [Caenorhabditis elegans]	40427.2	24	69	0.54	IWHHTFYNELR	35.1	1515.75
N2 Neg Ctrl IP	Protein ACT-4, isoform a [Caenorhabditis elegans]	40427.2	24	69	0.54	KDLYANTVLSGGTTMYPGIADR	59.8	2343.17
N2 Neg Ctrl IP	Protein ACT-4, isoform a [Caenorhabditis elegans]	40427.2	24	69	0.54	LCYVALDFEQEMATAASSSSLEK	108	2550.17
N2 Neg Ctrl IP	Protein ACT-4, isoform a [Caenorhabditis elegans]	40427.2	24	69	0.54	LCYVALDFEQEMATAASSSSLEKSYELPDGQVITVGNER	106	4308.03
N2 Neg Ctrl IP	Protein ACT-4, isoform a [Caenorhabditis elegans]	40427.2	24	69	0.54	LDLAGRDLTDYLMK	18.9	1623.84
N2 Neg Ctrl IP	Protein ACT-4, isoform a [Caenorhabditis elegans]	40427.2	24	69	0.54	MQKEITALAPSTMK	80.5	1548.81
N2 Neg Ctrl IP	Protein ACT-4, isoform a [Caenorhabditis elegans]	40427.2	24	69	0.54	SYELPDGQVITVGNER	94.5	1776.88
N2 Neg Ctrl IP	Protein ACT-4, isoform a [Caenorhabditis elegans]	40427.2	24	69	0.54	SYELPDGQVITVGNERFR	38.2	2080.05
N2 Neg Ctrl IP	Protein ACT-4, isoform a [Caenorhabditis elegans]	40427.2	24	69	0.54	VAPEEHPVLLTEAPLNPK	66.9	1954.06
N2 Neg Ctrl IP	Protein ACT-4, isoform a [Caenorhabditis elegans]	40427.2	24	69	0.54	VAPEEHPVLLTEAPLNPKANR	35	2296.23
N2 Neg Ctrl IP	Protein ACT-4, isoform b [Caenorhabditis elegans]	37279.8	1	2	0.533	CDIDIRK	32.9	919.467
N2 Neg Ctrl IP	Protein ACT-4, isoform b [Caenorhabditis elegans]	37279.8	1	2	0.533	CPEALFQPSFLGMESAGIHETSYNSIMK	51.6	3144.45
N2 Neg Ctrl IP	Protein ACT-4, isoform b [Caenorhabditis elegans]	37279.8	1	2	0.533	DLYANTVLSGGTTMYPGIADR	95	2215.07
N2 Neg Ctrl IP	Protein ACT-4, isoform b [Caenorhabditis elegans]	37279.8	1	2	0.533	DLYANTVLSGGTTMYPGIADRMQK	65.3	2602.26
N2 Neg Ctrl IP	Protein ACT-4, isoform b [Caenorhabditis elegans]	37279.8	1	2	0.533	DSYVGDEAQSK	57.3	1198.52
N2 Neg Ctrl IP	Protein ACT-4, isoform b [Caenorhabditis elegans]	37279.8	1	2	0.533	DSYVGDEAQSKR	62.5	1354.62
N2 Neg Ctrl IP	Protein ACT-4, isoform b [Caenorhabditis elegans]	37279.8	1	2	0.533	EITALAPSTMK	47.5	1161.62
N2 Neg Ctrl IP	Protein ACT-4, isoform b [Caenorhabditis elegans]	37279.8	1	2	0.533	EKLCYVALDFEQEMATAASSSSLEK	69.8	2807.31
N2 Neg Ctrl IP	Protein ACT-4, isoform b [Caenorhabditis elegans]	37279.8	1	2	0.533	FRCPEALFQPSFLGMESAGIHETSYNSIMK	68.5	3447.62
N2 Neg Ctrl IP	Protein ACT-4, isoform b [Caenorhabditis elegans]	37279.8	1	2	0.533	IWHHTFYNELR	35.1	1515.75
N2 Neg Ctrl IP	Protein ACT-4, isoform b [Caenorhabditis elegans]	37279.8	1	2	0.533	KDLYANTVLSGGTTMYPGIADR	59.8	2343.17
N2 Neg Ctrl IP	Protein ACT-4, isoform b [Caenorhabditis elegans]	37279.8	1	2	0.533	LCYVALDFEQEMATAASSSSLEK	108	2550.17
N2 Neg Ctrl IP	Protein ACT-4, isoform b [Caenorhabditis elegans]	37279.8	1	2	0.533	LCYVALDFEQEMATAASSSSLEKSYELPDGQVITVGNER	106	4308.03
N2 Neg Ctrl IP	Protein ACT-4, isoform b [Caenorhabditis elegans]	37279.8	1	2	0.533	LDLAGRDLTDYLMK	18.9	1623.84
N2 Neg Ctrl IP	Protein ACT-4, isoform b [Caenorhabditis elegans]	37279.8	1	2	0.533	MQKEITALAPSTMK	80.5	1548.81
N2 Neg Ctrl IP	Protein ACT-4, isoform b [Caenorhabditis elegans]	37279.8	1	2	0.533	SYELPDGQVITVGNER	94.5	1776.88
N2 Neg Ctrl IP	Protein ACT-4, isoform b [Caenorhabditis elegans]	37279.8	1	2	0.533	SYELPDGQVITVGNERFR	38.2	2080.05
N2 Neg Ctrl IP	Protein ACT-4, isoform b [Caenorhabditis elegans]	37279.8	1	2	0.533	VAPEEHPVLLTEAPLNPK	66.9	1954.06
N2 Neg Ctrl IP	Protein ACT-4, isoform b [Caenorhabditis elegans]	37279.8	1	2	0.533	VAPEEHPVLLTEAPLNPKANR	35	2296.23
N2 Neg Ctrl IP	Protein ACT-4, isoform b [Caenorhabditis elegans]	37279.8	1	2	0.533	VGMGQKDSYVGDEAQSK	64.3	1798.83
N2 Neg Ctrl IP	Protein PAT-10 [Caenorhabditis elegans]	18517.6	2	4	0.261	LFDKEGNGYISRPTLK	28.4	1838.96
N2 Neg Ctrl IP	Protein PAT-10 [Caenorhabditis elegans]	18517.6	2	4	0.261	QGYIMATQIGQIMHGMEQDFDEKTLR	36.5	3040.43
N2 Neg Ctrl IP	Protein RPL-20 [Caenorhabditis elegans]	20959.4	3	3	0.178	ALGETLNEYVVVGR	74	1519.81
N2 Neg Ctrl IP	Protein RPL-20 [Caenorhabditis elegans]	20959.4	3	3	0.178	NLSVFTTARQNTHFA	28.9	1706.86
N2 Neg Ctrl IP	Protein RPL-20 [Caenorhabditis elegans]	20959.4	3	3	0.178	PTKALGETLNEYVVVGR	41.6	1846.01
N2 Neg Ctrl IP	Protein RPS-12 [Caenorhabditis elegans]	15069	1	1	0.136	VVGCSSAVVTNWGNEEQGR	73.4	2049.93
N2 Neg Ctrl IP	Protein RPL-4 [Caenorhabditis elegans]	38659.5	8	8	0.249	IIRSEEVVK	34.8	1072.64
N2 Neg Ctrl IP	Protein RPL-4 [Caenorhabditis elegans]	38659.5	8	8	0.249	LGPVVIYGQDAECAR	71.4	1647.82
N2 Neg Ctrl IP	Protein RPL-4 [Caenorhabditis elegans]	38659.5	8	8	0.249	LNPYASILR	25.7	1046.6
N2 Neg Ctrl IP	Protein RPL-4 [Caenorhabditis elegans]	38659.5	8	8	0.249	RYAVSSAIAASGIPALLQAR	15.3	2015.14
N2 Neg Ctrl IP	Protein RPL-4 [Caenorhabditis elegans]	38659.5	8	8	0.249	SGQGAFGNMCR	28.2	1184.49
N2 Neg Ctrl IP	Protein RPL-4 [Caenorhabditis elegans]	38659.5	8	8	0.249	TLLYKLNPYASILR	26.8	1664.97
N2 Neg Ctrl IP	Protein RPL-4 [Caenorhabditis elegans]	38659.5	8	8	0.249	TPIRPDLVSFIADQVRR	38.8	1983.11
N2 Neg Ctrl IP	Protein RPL-4 [Caenorhabditis elegans]	38659.5	8	8	0.249	YAVSSAIAASGIPALLQAR	55	1859.04
N2 Neg Ctrl IP	Protein VIT-6, isoform a [Caenorhabditis elegans]	193219	4	4	0.0297	AFTLSLLR	42.7	920.556
N2 Neg Ctrl IP	Protein VIT-6, isoform a [Caenorhabditis elegans]	193219	4	4	0.0297	ASGSFQPTEFLSNLLEKLR	23.2	2137.13
N2 Neg Ctrl IP	Protein VIT-6, isoform a [Caenorhabditis elegans]	193219	4	4	0.0297	ATINVEPR	39.6	899.495
N2 Neg Ctrl IP	Protein VIT-6, isoform a [Caenorhabditis elegans]	193219	4	4	0.0297	TSVYCLPSSNSWAR	36.3	1627.75
N2 Neg Ctrl IP	Protein TSN-1 [Caenorhabditis elegans]	100777	3	4	0.0788	LQTLVNDYNTTEEVAR	27.6	1865.92
N2 Neg Ctrl IP	Protein TSN-1 [Caenorhabditis elegans]	100777	3	4	0.0788	SVLSGDAVILQGQPHNGPPPEWTVYLSNVTAPR	42.6	3500.78
N2 Neg Ctrl IP	Protein TSN-1 [Caenorhabditis elegans]	100777	3	4	0.0788	VGPGGVSTGAAEPFADEAAAFTR	59.8	2178.05
N2 Neg Ctrl IP	Protein RPL-5 [Caenorhabditis elegans]	33387.3	2	3	0.0956	ALLLQLKEQQE	47.7	1312.75
N2 Neg Ctrl IP	Protein RPL-5 [Caenorhabditis elegans]	33387.3	2	3	0.0956	FLAAGLNADNLVATYQK	70.3	1808.95
N2 Neg Ctrl IP	Protein CAP-1 [Caenorhabditis elegans]	32181.2	3	3	0.11	HAPPGEFNEVFNSVR	20.5	1699.82
N2 Neg Ctrl IP	Protein CAP-1 [Caenorhabditis elegans]	32181.2	3	3	0.11	IASDFIKHAPPGEFNEVFNSVR	39.8	2475.23
N2 Neg Ctrl IP	Protein CAP-1 [Caenorhabditis elegans]	32181.2	3	3	0.11	SGTGVVFAR	27.7	893.484
N2 Neg Ctrl IP	Protein IFB-1, isoform b [Caenorhabditis elegans]	67150	1	1	0.039	MVTEMGSATVGGISPALSANAAK	91.2	2163.08
N2 Neg Ctrl IP	Protein TNI-3 [Caenorhabditis elegans]	29839.4	4	5	0.146	IYEDMFAR	25.3	1044.48
N2 Neg Ctrl IP	Protein TNI-3 [Caenorhabditis elegans]	29839.4	4	5	0.146	KGTADGKPEWSK	24.5	1303.66
N2 Neg Ctrl IP	Protein TNI-3 [Caenorhabditis elegans]	29839.4	4	5	0.146	TIPLPDVDSINDQGQLLK	42	1966.05
N2 Neg Ctrl IP	Protein TNI-3 [Caenorhabditis elegans]	29839.4	4	5	0.146	TIPLPDVDSINDQGQLLKIYEDMFAR	56.5	2991.51
N2 Neg Ctrl IP	Protein MUP-2 [Caenorhabditis elegans]	47040.4	7	14	0.368	GDQAAQFGNLAQAK	39.8	1418.7
N2 Neg Ctrl IP	Protein MUP-2 [Caenorhabditis elegans]	47040.4	7	14	0.368	GLDPEEAASSVHPPK	33.7	1533.75
N2 Neg Ctrl IP	Protein MUP-2 [Caenorhabditis elegans]	47040.4	7	14	0.368	GLDPEEAASSVHPPKITTASK	18.9	2135.1
N2 Neg Ctrl IP	Protein MUP-2 [Caenorhabditis elegans]	47040.4	7	14	0.368	GTGRPPAEWGR	42.1	1183.6
N2 Neg Ctrl IP	Protein MUP-2 [Caenorhabditis elegans]	47040.4	7	14	0.368	ITTASKFDR	49.3	1038.56
N2 Neg Ctrl IP	Protein MUP-2 [Caenorhabditis elegans]	47040.4	7	14	0.368	NFTVASKGDQAAQFGNLAQAK	62.5	2166.09
N2 Neg Ctrl IP	Protein MUP-2 [Caenorhabditis elegans]	47040.4	7	14	0.368	RAPVQEEKPPAEMTEAEIAMLAAK	61.3	2610.33
N2 Neg Ctrl IP	Protein MUP-2 [Caenorhabditis elegans]	47040.4	7	14	0.368	VEGARAPVEPVPLFVPTDDFEPQQVTEDPNVGEEVVVE	40.6	4133.02
N2 Neg Ctrl IP	Protein MUP-2 [Caenorhabditis elegans]	47040.4	7	14	0.368	VQDVSGLLPNDLKER	78	1682.91
N2 Neg Ctrl IP	Protein MUP-2 [Caenorhabditis elegans]	47040.4	7	14	0.368	YLFENPEEEKQASLVR	65.4	1951.98
N2 Neg Ctrl IP	Protein RPL-33 [Caenorhabditis elegans]	13768.5	2	2	0.0806	IRVLLYPSNI	29.5	1187.71
N2 Neg Ctrl IP	Protein RPL-33 [Caenorhabditis elegans]	13768.5	2	2	0.0806	VLLYPSNI	48.1	918.529
N2 Neg Ctrl IP	Protein RPL-2 [Caenorhabditis elegans]	28204	3	3	0.169	ASGNYATVIAHNPDTK	16.1	1658.81
N2 Neg Ctrl IP	Protein RPL-2 [Caenorhabditis elegans]	28204	3	3	0.169	TTVVAAEGMHTGQFIHCGAK	48.3	2115.01
N2 Neg Ctrl IP	Protein RPL-2 [Caenorhabditis elegans]	28204	3	3	0.169	VGLIAARR	30.7	855.552
N2 Neg Ctrl IP	Protein LEV-11, isoform a [Caenorhabditis elegans]	33003.7	8	12	0.377	ALQREDSYEEQIR	26.2	1636.79
N2 Neg Ctrl IP	Protein LEV-11, isoform a [Caenorhabditis elegans]	33003.7	8	12	0.377	EAETRAEFAER	26.6	1308.62
N2 Neg Ctrl IP	Protein LEV-11, isoform a [Caenorhabditis elegans]	33003.7	8	12	0.377	MTLLEEELERAEER	45.5	1747.85
N2 Neg Ctrl IP	Protein LEV-11, isoform a [Caenorhabditis elegans]	33003.7	8	12	0.377	MTQTGDDLDKAQEDLSAATSK	42.5	2225.02
N2 Neg Ctrl IP	Protein LEV-11, isoform a [Caenorhabditis elegans]	33003.7	8	12	0.377	SLQDEERANTVEAQLK	38.1	1830.92
N2 Neg Ctrl IP	Protein LEV-11, isoform a [Caenorhabditis elegans]	33003.7	8	12	0.377	TISEELDSTFQELSGY	64.1	1818.83
N2 Neg Ctrl IP	Protein LEV-11, isoform a [Caenorhabditis elegans]	33003.7	8	12	0.377	TVQEAEAEVASLNR	22.5	1516.76
N2 Neg Ctrl IP	Protein LEV-11, isoform a [Caenorhabditis elegans]	33003.7	8	12	0.377	YKTISEELDSTFQELSGY	90.7	2109.99
N2 Neg Ctrl IP	Protein CAH-4, isoform a [Caenorhabditis elegans]	26170.3	3	5	0.125	NCGTFLTANHLPSSK	52.9	1646.8
N2 Neg Ctrl IP	Protein CAH-4, isoform a [Caenorhabditis elegans]	26170.3	3	5	0.125	RNCGTFLTANHLPSSK	25.1	1802.9
N2 Neg Ctrl IP	Protein CAH-4, isoform a [Caenorhabditis elegans]	26170.3	3	5	0.125	SGDCCDVLVSEGGFLVNVKR	32.7	2211.05
N2 Neg Ctrl IP	Protein MLC-5 [Caenorhabditis elegans]	15970.3	2	3	0.373	HLLTTLGERLSDEDVDQLLSGHNDSHGNVNISDFVR	29.3	4002.95
N2 Neg Ctrl IP	Protein MLC-5 [Caenorhabditis elegans]	15970.3	2	3	0.373	LSFEDFVPIFQSVSKNR	23.6	2013.04
N2 Neg Ctrl IP	Protein MLC-3, isoform a [Caenorhabditis elegans]	17145.1	9	13	0.359	AAGLKPTQAMVTK	55.4	1315.74
N2 Neg Ctrl IP	Protein MLC-3, isoform a [Caenorhabditis elegans]	17145.1	9	13	0.359	AAGLKPTQAMVTKAAGQEFK	55.5	2047.1
N2 Neg Ctrl IP	Protein MLC-3, isoform a [Caenorhabditis elegans]	17145.1	9	13	0.359	AAGQEFK	46.3	750.378
N2 Neg Ctrl IP	Protein MLC-3, isoform a [Caenorhabditis elegans]	17145.1	9	13	0.359	AAGQEFKR	46.6	906.479
N2 Neg Ctrl IP	Protein MLC-3, isoform a [Caenorhabditis elegans]	17145.1	9	13	0.359	ILAAELR	35.5	785.488
N2 Neg Ctrl IP	Protein MLC-3, isoform a [Caenorhabditis elegans]	17145.1	9	13	0.359	KVLAGPFPDQD	54.6	1186.61
N2 Neg Ctrl IP	Protein MLC-3, isoform a [Caenorhabditis elegans]	17145.1	9	13	0.359	LTFEEWLPMYEQLAK	40.4	1897.94
N2 Neg Ctrl IP	Protein MLC-3, isoform a [Caenorhabditis elegans]	17145.1	9	13	0.359	RLTFEEWLPMYEQLAK	31.6	2054.04
N2 Neg Ctrl IP	Protein MLC-3, isoform a [Caenorhabditis elegans]	17145.1	9	13	0.359	VLAGPFPDQD	79.3	1058.52
N2 Neg Ctrl IP	Protein DIM-1, isoform a [Caenorhabditis elegans]	71851.8	3	4	0.0797	LTGFSSPTFVEKPQISSRDDGQVMVMEFR	34.7	3289.59
N2 Neg Ctrl IP	Protein DIM-1, isoform a [Caenorhabditis elegans]	71851.8	3	4	0.0797	MNPQVTWISPK	53.1	1316.67
N2 Neg Ctrl IP	Protein DIM-1, isoform a [Caenorhabditis elegans]	71851.8	3	4	0.0797	SILEPTFVWQK	36.8	1347.73
N2 Neg Ctrl IP	Protein MYO-6, isoform a [Caenorhabditis elegans]	143123	2	2	0.0389	NMMSDKENQSMLITGESGAGK	38	2309.93
N2 Neg Ctrl IP	Protein MYO-6, isoform a [Caenorhabditis elegans]	143123	2	2	0.0389	TSGLIDAPLVLNQLTCNGVLEGIRICR	37.8	2983.57
N2 Neg Ctrl IP	Protein RPL-13, isoform a [Caenorhabditis elegans]	23753.5	4	4	0.203	AVEIAPRPVAGLLR	32.1	1461.89
N2 Neg Ctrl IP	Protein RPL-13, isoform a [Caenorhabditis elegans]	23753.5	4	4	0.203	GFSLQELKAAGISQAQAR	43.7	1875.01
N2 Neg Ctrl IP	Protein RPL-13, isoform a [Caenorhabditis elegans]	23753.5	4	4	0.203	TIGIAVDVR	23.5	943.557
N2 Neg Ctrl IP	Protein RPL-13, isoform a [Caenorhabditis elegans]	23753.5	4	4	0.203	TIGIAVDVRR	26	1099.66
N2 Neg Ctrl IP	Protein RPL-7A, isoform c [Caenorhabditis elegans]	27939.1	3	3	0.114	NFNIGQDIQPK	34.9	1273.65
N2 Neg Ctrl IP	Protein RPL-7A, isoform c [Caenorhabditis elegans]	27939.1	3	3	0.114	QSAILQKR	34.5	943.568
N2 Neg Ctrl IP	Protein RPL-7A, isoform c [Caenorhabditis elegans]	27939.1	3	3	0.114	VAAVPAHIR	34.7	933.563
N2 Neg Ctrl IP	Protein ZC373.2 [Caenorhabditis elegans]	11058.5	2	2	0.5	ALQDGLTTDFASGFISNDRR	22.3	2184.07
N2 Neg Ctrl IP	Protein ZC373.2 [Caenorhabditis elegans]	11058.5	2	2	0.5	TVVSAPIDGAPGTATCSDTTTPERCSGCCQAR	40.3	3384.46
N2 Neg Ctrl IP	Protein LEC-2, isoform b [Caenorhabditis elegans]	131928	1	1	0.0576	SKLVEPFEPGQTLIVK	21.7	1785.02
N2 Neg Ctrl IP	Protein BEN-1 [Caenorhabditis elegans]	49446.5	2	2	0.0923	AVLVDLEPGTMDSVR	46.9	1601.82
N2 Neg Ctrl IP	Protein BEN-1 [Caenorhabditis elegans]	49446.5	2	2	0.0923	SGPFGQLFRPDNFVFGQSGAGNNWAK	56.2	2798.34
N2 Neg Ctrl IP	Protein PAB-1, isoform b [Caenorhabditis elegans]	65092.1	3	4	0.123	FGNITSCEVMTVEGK	24.5	1687.77
N2 Neg Ctrl IP	Protein PAB-1, isoform b [Caenorhabditis elegans]	65092.1	3	4	0.123	MGRPQNQQGGPRGPPQQYNQVAQGGVR	43	2905.43
N2 Neg Ctrl IP	Protein PAB-1, isoform b [Caenorhabditis elegans]	65092.1	3	4	0.123	MHGNVPGAAMYNPTQPGPGYYVANPMQQQR	43.6	3274.5

## Sheet: tab 2 - IP MS of FBF-2 vs N2
Sample (Scroll down for N2 control)	Protein name	Protein MW (Da)	Unique peptides	Unique spectra	Percentage sequence coverage	Peptide sequence	Best Mascot Ion score	Calculated +1H Peptide Mass (AMU)
3xFLAG::FBF-2 IP	Protein F40A3.6 [Caenorhabditis elegans]	30245.2	17	26	0.69	DHGLSATSMLR	50	1187.58
3xFLAG::FBF-2 IP	Protein F40A3.6 [Caenorhabditis elegans]	30245.2	17	26	0.69	ELASYDKEDYEDFTGEPK	88.9	2135.93
3xFLAG::FBF-2 IP	Protein F40A3.6 [Caenorhabditis elegans]	30245.2	17	26	0.69	FISKIEETLAMVR	53.8	1536.85
3xFLAG::FBF-2 IP	Protein F40A3.6 [Caenorhabditis elegans]	30245.2	17	26	0.69	GNSSFDRDIVPGGAHTK	47	1757.86
3xFLAG::FBF-2 IP	Protein F40A3.6 [Caenorhabditis elegans]	30245.2	17	26	0.69	IEETLAMVR	63.8	1077.56
3xFLAG::FBF-2 IP	Protein F40A3.6 [Caenorhabditis elegans]	30245.2	17	26	0.69	IIGSNFVQLTSRPK	86.2	1559.89
3xFLAG::FBF-2 IP	Protein F40A3.6 [Caenorhabditis elegans]	30245.2	17	26	0.69	IIGSNFVQLTSRPKDK	39.5	1803.01
3xFLAG::FBF-2 IP	Protein F40A3.6 [Caenorhabditis elegans]	30245.2	17	26	0.69	KNLYSSISSYRPPLSSYK	49.7	2090.09
3xFLAG::FBF-2 IP	Protein F40A3.6 [Caenorhabditis elegans]	30245.2	17	26	0.69	MPLESLYAELGLKNPAASNYR	109	2337.19
3xFLAG::FBF-2 IP	Protein F40A3.6 [Caenorhabditis elegans]	30245.2	17	26	0.69	NIFHPTNR	24.8	998.517
3xFLAG::FBF-2 IP	Protein F40A3.6 [Caenorhabditis elegans]	30245.2	17	26	0.69	NLYSSISSYRPPLSSYK	35	1962
3xFLAG::FBF-2 IP	Protein F40A3.6 [Caenorhabditis elegans]	30245.2	17	26	0.69	SFQVYEPK	34.4	997.499
3xFLAG::FBF-2 IP	Protein F40A3.6 [Caenorhabditis elegans]	30245.2	17	26	0.69	SSSEYFAASYEAER	101	1596.68
3xFLAG::FBF-2 IP	Protein F40A3.6 [Caenorhabditis elegans]	30245.2	17	26	0.69	SSSEYFAASYEAERER	43.2	1881.82
3xFLAG::FBF-2 IP	Protein F40A3.6 [Caenorhabditis elegans]	30245.2	17	26	0.69	SYESYVK	35.2	875.414
3xFLAG::FBF-2 IP	Protein F40A3.6 [Caenorhabditis elegans]	30245.2	17	26	0.69	SYESYVKNIFHPTNR	65.5	1854.91
3xFLAG::FBF-2 IP	Protein F40A3.6 [Caenorhabditis elegans]	30245.2	17	26	0.69	TLIDYKDFDSSPLSPYLYQSHPYVR	68.8	3004.47
3xFLAG::FBF-2 IP	Protein MLC-5 [Caenorhabditis elegans]	15970.3	4	4	0.507	CVGSFDREAR	27.5	1196.55
3xFLAG::FBF-2 IP	Protein MLC-5 [Caenorhabditis elegans]	15970.3	4	4	0.507	HLLTTLGERLSDEDVDQLLSGHNDSHGNVNISDFVR	28.8	4002.95
3xFLAG::FBF-2 IP	Protein MLC-5 [Caenorhabditis elegans]	15970.3	4	4	0.507	ISVQQVGDVLR	79.7	1213.69
3xFLAG::FBF-2 IP	Protein MLC-5 [Caenorhabditis elegans]	15970.3	4	4	0.507	LSFEDFVPIFQSVSK	56.2	1742.9
3xFLAG::FBF-2 IP	Protein PAR-5, isoform a [Caenorhabditis elegans]	28191	1	1	0.0524	VTEQGQELSNEER	72.6	1518.7
3xFLAG::FBF-2 IP	Protein IFB-1, isoform b [Caenorhabditis elegans]	67150	5	5	0.127	HRDDLAEYR	48.3	1174.56
3xFLAG::FBF-2 IP	Protein IFB-1, isoform b [Caenorhabditis elegans]	67150	5	5	0.127	LKVSEVQGSANR	40.9	1287.7
3xFLAG::FBF-2 IP	Protein IFB-1, isoform b [Caenorhabditis elegans]	67150	5	5	0.127	MVTEMGSATVGGISPALSANAAK	93.4	2163.08
3xFLAG::FBF-2 IP	Protein IFB-1, isoform b [Caenorhabditis elegans]	67150	5	5	0.127	QSGNYVSGGNGAGSGGR	75.9	1525.66
3xFLAG::FBF-2 IP	Protein IFB-1, isoform b [Caenorhabditis elegans]	67150	5	5	0.127	THSLQQQENTDSTR	77.9	1644.76
3xFLAG::FBF-2 IP	Protein MIG-6, isoform a [Caenorhabditis elegans]	237592	3	3	0.0359	GAGFYGCPESCAQSQFGCCPDGKTR	63.2	2799.09
3xFLAG::FBF-2 IP	Protein MIG-6, isoform a [Caenorhabditis elegans]	237592	3	3	0.0359	QSMEDICR	38.1	1038.43
3xFLAG::FBF-2 IP	Protein MIG-6, isoform a [Caenorhabditis elegans]	237592	3	3	0.0359	YGCCPDGETTALGPRNDGCDNCR	52.2	2645.02
3xFLAG::FBF-2 IP	Protein UNC-87, isoform b [Caenorhabditis elegans]	41576.2	43	79	0.925	ETTKMVDSNHPDYSHECSIDQTTIPSQMGSNQYASQK	44.2	4215.82
3xFLAG::FBF-2 IP	Protein UNC-87, isoform b [Caenorhabditis elegans]	41576.2	43	79	0.925	FASQAGMIGFGTCR	60	1518.68
3xFLAG::FBF-2 IP	Protein UNC-87, isoform b [Caenorhabditis elegans]	41576.2	43	79	0.925	FASQKGMTGFGTAR	58.4	1458.72
3xFLAG::FBF-2 IP	Protein UNC-87, isoform b [Caenorhabditis elegans]	41576.2	43	79	0.925	GDSQKLMTNFGTPR	50.4	1551.76
3xFLAG::FBF-2 IP	Protein UNC-87, isoform b [Caenorhabditis elegans]	41576.2	43	79	0.925	GMTGFGQPR	52.5	966.446
3xFLAG::FBF-2 IP	Protein UNC-87, isoform b [Caenorhabditis elegans]	41576.2	43	79	0.925	GMTGFGQPRWEVLDPSISWQNR	51.4	2561.24
3xFLAG::FBF-2 IP	Protein UNC-87, isoform b [Caenorhabditis elegans]	41576.2	43	79	0.925	GMTGFGSGR	39.3	869.394
3xFLAG::FBF-2 IP	Protein UNC-87, isoform b [Caenorhabditis elegans]	41576.2	43	79	0.925	GMTGFGSGRDVCR	25.5	1399.62
3xFLAG::FBF-2 IP	Protein UNC-87, isoform b [Caenorhabditis elegans]	41576.2	43	79	0.925	GMTGFGTAR	47.9	897.425
3xFLAG::FBF-2 IP	Protein UNC-87, isoform b [Caenorhabditis elegans]	41576.2	43	79	0.925	GMTGFGTARR	19.3	1069.52
3xFLAG::FBF-2 IP	Protein UNC-87, isoform b [Caenorhabditis elegans]	41576.2	43	79	0.925	GMTGFGTGRR	29.8	1039.51
3xFLAG::FBF-2 IP	Protein UNC-87, isoform b [Caenorhabditis elegans]	41576.2	43	79	0.925	IRMSEGIVR	32.2	1060.59
3xFLAG::FBF-2 IP	Protein UNC-87, isoform b [Caenorhabditis elegans]	41576.2	43	79	0.925	IWELEYPEEAEISLDR	75.5	1991.96
3xFLAG::FBF-2 IP	Protein UNC-87, isoform b [Caenorhabditis elegans]	41576.2	43	79	0.925	IWELEYPEEAEISLDRL	74.2	2105.04
3xFLAG::FBF-2 IP	Protein UNC-87, isoform b [Caenorhabditis elegans]	41576.2	43	79	0.925	KMTSFGAPR	55.6	994.514
3xFLAG::FBF-2 IP	Protein UNC-87, isoform b [Caenorhabditis elegans]	41576.2	43	79	0.925	LMTNFGTPR	59.6	1036.52
3xFLAG::FBF-2 IP	Protein UNC-87, isoform b [Caenorhabditis elegans]	41576.2	43	79	0.925	LQAGTNKYDSQK	57.9	1353.66
3xFLAG::FBF-2 IP	Protein UNC-87, isoform b [Caenorhabditis elegans]	41576.2	43	79	0.925	LQSGTNKYCSQR	77.8	1441.69
3xFLAG::FBF-2 IP	Protein UNC-87, isoform b [Caenorhabditis elegans]	41576.2	43	79	0.925	LQSGTNRFASQAGMIGFGTCR	69.1	2275.07
3xFLAG::FBF-2 IP	Protein UNC-87, isoform b [Caenorhabditis elegans]	41576.2	43	79	0.925	MPPTEDQVVAEEQPNATMETK	78.4	2345.06
3xFLAG::FBF-2 IP	Protein UNC-87, isoform b [Caenorhabditis elegans]	41576.2	43	79	0.925	MPPTEDQVVAEEQPNATMETKVTGQGQPK	116	3140.49
3xFLAG::FBF-2 IP	Protein UNC-87, isoform b [Caenorhabditis elegans]	41576.2	43	79	0.925	MSEGIVR	39.9	791.408
3xFLAG::FBF-2 IP	Protein UNC-87, isoform b [Caenorhabditis elegans]	41576.2	43	79	0.925	MTSFGAPR	43.6	866.419
3xFLAG::FBF-2 IP	Protein UNC-87, isoform b [Caenorhabditis elegans]	41576.2	43	79	0.925	MTSFGAPRDVK	28.8	1224.6
3xFLAG::FBF-2 IP	Protein UNC-87, isoform b [Caenorhabditis elegans]	41576.2	43	79	0.925	MVDSKHPEYDHEKPDQSEIPLQSGTNK	45.6	3109.45
3xFLAG::FBF-2 IP	Protein UNC-87, isoform b [Caenorhabditis elegans]	41576.2	43	79	0.925	MVDSNHPDYSHECSIDQTTIPSQMGSNQYASQK	91.8	3755.6
3xFLAG::FBF-2 IP	Protein UNC-87, isoform b [Caenorhabditis elegans]	41576.2	43	79	0.925	MVDSNHPDYSHECSIDQTTIPSQMGSNQYASQKGMTGFGQPR	78.6	4688.02
3xFLAG::FBF-2 IP	Protein UNC-87, isoform b [Caenorhabditis elegans]	41576.2	43	79	0.925	NTTFEAEGGELPYEAMK	89.8	1902.84
3xFLAG::FBF-2 IP	Protein UNC-87, isoform b [Caenorhabditis elegans]	41576.2	43	79	0.925	PPTEDQVVAEEQPNATMETK	114	2214.02
3xFLAG::FBF-2 IP	Protein UNC-87, isoform b [Caenorhabditis elegans]	41576.2	43	79	0.925	PPTEDQVVAEEQPNATMETKVTGQGQPK	94.4	3009.45
3xFLAG::FBF-2 IP	Protein UNC-87, isoform b [Caenorhabditis elegans]	41576.2	43	79	0.925	QTDGIIPSQAGWNK	50.1	1514.76
3xFLAG::FBF-2 IP	Protein UNC-87, isoform b [Caenorhabditis elegans]	41576.2	43	79	0.925	QTDGIIPSQAGWNKGDSQK	54.7	2029.99
3xFLAG::FBF-2 IP	Protein UNC-87, isoform b [Caenorhabditis elegans]	41576.2	43	79	0.925	RIWELEYPEEAEISLDR	36.8	2148.06
3xFLAG::FBF-2 IP	Protein UNC-87, isoform b [Caenorhabditis elegans]	41576.2	43	79	0.925	SENLQEIPEDIANR	68.7	1627.79
3xFLAG::FBF-2 IP	Protein UNC-87, isoform b [Caenorhabditis elegans]	41576.2	43	79	0.925	SENLQEIPEDIANRTHGEVR	38.1	2307.13
3xFLAG::FBF-2 IP	Protein UNC-87, isoform b [Caenorhabditis elegans]	41576.2	43	79	0.925	VAQNPADLAELPEEK	68.2	1623.82
3xFLAG::FBF-2 IP	Protein UNC-87, isoform b [Caenorhabditis elegans]	41576.2	43	79	0.925	VAQNPADLAELPEEKIR	53.8	1893.01
3xFLAG::FBF-2 IP	Protein UNC-87, isoform b [Caenorhabditis elegans]	41576.2	43	79	0.925	VKSENLQEIPEDIANR	28.1	1854.96
3xFLAG::FBF-2 IP	Protein UNC-87, isoform b [Caenorhabditis elegans]	41576.2	43	79	0.925	VSETIIPSQAGWNKGDSQK	56.7	2045.03
3xFLAG::FBF-2 IP	Protein UNC-87, isoform b [Caenorhabditis elegans]	41576.2	43	79	0.925	WEVLDPSISWQNR	75.1	1629.8
3xFLAG::FBF-2 IP	Protein UNC-87, isoform b [Caenorhabditis elegans]	41576.2	43	79	0.925	WEVLDPSISWQNRK	45	1757.9
3xFLAG::FBF-2 IP	Protein UNC-87, isoform b [Caenorhabditis elegans]	41576.2	43	79	0.925	WTLAQLR	40.7	887.51
3xFLAG::FBF-2 IP	Protein UNC-87, isoform b [Caenorhabditis elegans]	41576.2	43	79	0.925	YDSQKGMTGFGTGR	53.4	1504.69
3xFLAG::FBF-2 IP	Protein CHC-1 [Caenorhabditis elegans]	191546	2	2	0.0161	IQEGATDAATHNAMAKIYIDSNNNPER	1.11	2948.32
3xFLAG::FBF-2 IP	Protein CHC-1 [Caenorhabditis elegans]	191546	2	2	0.0161	IYIDSNNNPER	60.6	1334.63
3xFLAG::FBF-2 IP	Protein LEC-1, isoform b [Caenorhabditis elegans]	32684.3	3	3	0.123	FDEKHVIR	29.6	1043.56
3xFLAG::FBF-2 IP	Protein LEC-1, isoform b [Caenorhabditis elegans]	32684.3	3	3	0.123	SVLQEKFEPGQTLIVK	50.8	1817.01
3xFLAG::FBF-2 IP	Protein LEC-1, isoform b [Caenorhabditis elegans]	32684.3	3	3	0.123	WYEQNKPVPYR	23.2	1479.74
3xFLAG::FBF-2 IP	Protein VIT-6, isoform a [Caenorhabditis elegans]	193318	18	21	0.129	AIYNTPSEEKR	36.7	1307.66
3xFLAG::FBF-2 IP	Protein VIT-6, isoform a [Caenorhabditis elegans]	193318	18	21	0.129	ATINVEPR	39.8	899.495
3xFLAG::FBF-2 IP	Protein VIT-6, isoform a [Caenorhabditis elegans]	193318	18	21	0.129	FATSQQESNSMK	77.7	1357.61
3xFLAG::FBF-2 IP	Protein VIT-6, isoform a [Caenorhabditis elegans]	193318	18	21	0.129	GLEQIVVR	54.5	913.547
3xFLAG::FBF-2 IP	Protein VIT-6, isoform a [Caenorhabditis elegans]	193318	18	21	0.129	HRDMDYAFLPIDADSIPEVVR	1.33	2459.2
3xFLAG::FBF-2 IP	Protein VIT-6, isoform a [Caenorhabditis elegans]	193318	18	21	0.129	IAMIQSRPVTFTR	30.9	1519.84
3xFLAG::FBF-2 IP	Protein VIT-6, isoform a [Caenorhabditis elegans]	193318	18	21	0.129	NIQESSFR	23.4	980.48
3xFLAG::FBF-2 IP	Protein VIT-6, isoform a [Caenorhabditis elegans]	193318	18	21	0.129	NLRDQPQMEER	23.1	1415.67
3xFLAG::FBF-2 IP	Protein VIT-6, isoform a [Caenorhabditis elegans]	193318	18	21	0.129	NQFTPCYSVLAK	33.8	1427.7
3xFLAG::FBF-2 IP	Protein VIT-6, isoform a [Caenorhabditis elegans]	193318	18	21	0.129	QHEICFTQKPVLR	18.6	1655.87
3xFLAG::FBF-2 IP	Protein VIT-6, isoform a [Caenorhabditis elegans]	193318	18	21	0.129	QLSQSLDREYPQIR	33.1	1732.9
3xFLAG::FBF-2 IP	Protein VIT-6, isoform a [Caenorhabditis elegans]	193318	18	21	0.129	SINFDKCTR	22.9	1140.55
3xFLAG::FBF-2 IP	Protein VIT-6, isoform a [Caenorhabditis elegans]	193318	18	21	0.129	SYANNESPCEQTFSSR	67.5	1876.78
3xFLAG::FBF-2 IP	Protein VIT-6, isoform a [Caenorhabditis elegans]	193318	18	21	0.129	SYLYKDSK	35.1	1003.51
3xFLAG::FBF-2 IP	Protein VIT-6, isoform a [Caenorhabditis elegans]	193318	18	21	0.129	TRFATSQQESNSMK	40.2	1614.75
3xFLAG::FBF-2 IP	Protein VIT-6, isoform a [Caenorhabditis elegans]	193318	18	21	0.129	TSELVYNQESEWAEQQWAQTGEEKYLR	76	3303.51
3xFLAG::FBF-2 IP	Protein VIT-6, isoform a [Caenorhabditis elegans]	193318	18	21	0.129	VASTHVLSLR	29	1082.63
3xFLAG::FBF-2 IP	Protein VIT-6, isoform a [Caenorhabditis elegans]	193318	18	21	0.129	YWNMVQAYLR	52.7	1343.66
3xFLAG::FBF-2 IP	Protein FBF-2 [Caenorhabditis elegans]	71807	25	35	0.541	AVKGSLTSYQK	44.9	1181.65
3xFLAG::FBF-2 IP	Protein FBF-2 [Caenorhabditis elegans]	71807	25	35	0.541	CFSADIDR	51.5	983.425
3xFLAG::FBF-2 IP	Protein FBF-2 [Caenorhabditis elegans]	71807	25	35	0.541	CFSADIDRSK	48.1	1198.55
3xFLAG::FBF-2 IP	Protein FBF-2 [Caenorhabditis elegans]	71807	25	35	0.541	EGGYDHAISFQDWLK	52.9	1765.82
3xFLAG::FBF-2 IP	Protein FBF-2 [Caenorhabditis elegans]	71807	25	35	0.541	FASHVVEK	31.4	916.489
3xFLAG::FBF-2 IP	Protein FBF-2 [Caenorhabditis elegans]	71807	25	35	0.541	FAVDKTGCQFLEK	45.4	1542.76
3xFLAG::FBF-2 IP	Protein FBF-2 [Caenorhabditis elegans]	71807	25	35	0.541	FQLFEQVIGR	34.9	1236.67
3xFLAG::FBF-2 IP	Protein FBF-2 [Caenorhabditis elegans]	71807	25	35	0.541	HQQNHIVTSRPPTPLTDLMSLR	36.9	2541.34
3xFLAG::FBF-2 IP	Protein FBF-2 [Caenorhabditis elegans]	71807	25	35	0.541	KMIETLANLR	55	1188.68
3xFLAG::FBF-2 IP	Protein FBF-2 [Caenorhabditis elegans]	71807	25	35	0.541	LIAICVDQNANHVIQK	24.1	1835.98
3xFLAG::FBF-2 IP	Protein FBF-2 [Caenorhabditis elegans]	71807	25	35	0.541	LMTSVTNR	47.6	921.482
3xFLAG::FBF-2 IP	Protein FBF-2 [Caenorhabditis elegans]	71807	25	35	0.541	LSLSEVLDSGDLMK	90.4	1506.77
3xFLAG::FBF-2 IP	Protein FBF-2 [Caenorhabditis elegans]	71807	25	35	0.541	LVQALPR	41.1	796.504
3xFLAG::FBF-2 IP	Protein FBF-2 [Caenorhabditis elegans]	71807	25	35	0.541	MIETLANLR	43.7	1060.58
3xFLAG::FBF-2 IP	Protein FBF-2 [Caenorhabditis elegans]	71807	25	35	0.541	NFISSQMTDMCLDKFACR	38.3	2223.97
3xFLAG::FBF-2 IP	Protein FBF-2 [Caenorhabditis elegans]	71807	25	35	0.541	SFQSFPNVFMPVSR	61.7	1642.8
3xFLAG::FBF-2 IP	Protein FBF-2 [Caenorhabditis elegans]	71807	25	35	0.541	SNNVLPTWSLDSNGEMR	59.4	1920.88
3xFLAG::FBF-2 IP	Protein FBF-2 [Caenorhabditis elegans]	71807	25	35	0.541	TSQKPPSTGIDSYPTPAQSPMAQHETPMWDFNSLNPYFSMLNMNDGINYAR	52.8	5749.57
3xFLAG::FBF-2 IP	Protein FBF-2 [Caenorhabditis elegans]	71807	25	35	0.541	TSSFIQSDTDSSR	62.4	1430.64
3xFLAG::FBF-2 IP	Protein FBF-2 [Caenorhabditis elegans]	71807	25	35	0.541	TSSFIQSDTDSSRLESDDFSQNVR	68	2721.22
3xFLAG::FBF-2 IP	Protein FBF-2 [Caenorhabditis elegans]	71807	25	35	0.541	VIQSSLQNMDLSLACK	117	1822.9
3xFLAG::FBF-2 IP	Protein FBF-2 [Caenorhabditis elegans]	71807	25	35	0.541	VVAVIPLKNWEFIVDFVATPEHLR	33.6	2792.55
3xFLAG::FBF-2 IP	Protein FBF-2 [Caenorhabditis elegans]	71807	25	35	0.541	VVQTIIEK	44.8	929.567
3xFLAG::FBF-2 IP	Protein FBF-2 [Caenorhabditis elegans]	71807	25	35	0.541	VVQTIIEKLTADSMNVDLTSAAQNLR	54.8	2830.5
3xFLAG::FBF-2 IP	Protein FBF-2 [Caenorhabditis elegans]	71807	25	35	0.541	YSRPALSR	33.8	949.521
3xFLAG::FBF-2 IP	Protein MYO-3 [Caenorhabditis elegans]	225515	23	26	0.15	AATAARPFDSK	41.3	1134.59
3xFLAG::FBF-2 IP	Protein MYO-3 [Caenorhabditis elegans]	225515	23	26	0.15	AGKEQEAMGELAVK	35.5	1460.74
3xFLAG::FBF-2 IP	Protein MYO-3 [Caenorhabditis elegans]	225515	23	26	0.15	CIIPNEKK	33.3	1001.54
3xFLAG::FBF-2 IP	Protein MYO-3 [Caenorhabditis elegans]	225515	23	26	0.15	DLEESQHATDSEVR	80.6	1615.72
3xFLAG::FBF-2 IP	Protein MYO-3 [Caenorhabditis elegans]	225515	23	26	0.15	EKEEDSLNHETAISSLR	34.3	1957.95
3xFLAG::FBF-2 IP	Protein MYO-3 [Caenorhabditis elegans]	225515	23	26	0.15	HGDSVAELTEQLETLQKLK	72.3	2139.13
3xFLAG::FBF-2 IP	Protein MYO-3 [Caenorhabditis elegans]	225515	23	26	0.15	HSTDNSLMLDIWQDYQTQEEAAEAAK	64.4	2995.33
3xFLAG::FBF-2 IP	Protein MYO-3 [Caenorhabditis elegans]	225515	23	26	0.15	IQEKEEEFENTR	64.2	1551.73
3xFLAG::FBF-2 IP	Protein MYO-3 [Caenorhabditis elegans]	225515	23	26	0.15	IVTMFQSR	39.9	981.519
3xFLAG::FBF-2 IP	Protein MYO-3 [Caenorhabditis elegans]	225515	23	26	0.15	LAGGDIEHYLLEK	34	1457.76
3xFLAG::FBF-2 IP	Protein MYO-3 [Caenorhabditis elegans]	225515	23	26	0.15	LEEAVQRGEIAR	26.3	1370.74
3xFLAG::FBF-2 IP	Protein MYO-3 [Caenorhabditis elegans]	225515	23	26	0.15	LIKELTAR	37.5	943.594
3xFLAG::FBF-2 IP	Protein MYO-3 [Caenorhabditis elegans]	225515	23	26	0.15	LNNENSDLNR	38.7	1188.56
3xFLAG::FBF-2 IP	Protein MYO-3 [Caenorhabditis elegans]	225515	23	26	0.15	NAELEEELEAERNSR	31.6	1788.84
3xFLAG::FBF-2 IP	Protein MYO-3 [Caenorhabditis elegans]	225515	23	26	0.15	QISKLNAEIQQWK	57.4	1585.87
3xFLAG::FBF-2 IP	Protein MYO-3 [Caenorhabditis elegans]	225515	23	26	0.15	QVEEAEEVAASNLNK	64.2	1630.79
3xFLAG::FBF-2 IP	Protein MYO-3 [Caenorhabditis elegans]	225515	23	26	0.15	QVEEAEEVAASNLNKYK	33.7	1921.95
3xFLAG::FBF-2 IP	Protein MYO-3 [Caenorhabditis elegans]	225515	23	26	0.15	SLQDEMANQDEAVAK	102	1648.75
3xFLAG::FBF-2 IP	Protein MYO-3 [Caenorhabditis elegans]	225515	23	26	0.15	STAGIMHMGEMK	59.4	1292.58
3xFLAG::FBF-2 IP	Protein MYO-3 [Caenorhabditis elegans]	225515	23	26	0.15	VLTAQFEQAEERADIAENALSK	49.7	2433.23
3xFLAG::FBF-2 IP	Protein MYO-3 [Caenorhabditis elegans]	225515	23	26	0.15	VQELTDTNEGLFAK	59.9	1564.79
3xFLAG::FBF-2 IP	Protein MYO-3 [Caenorhabditis elegans]	225515	23	26	0.15	YAILAADAAK	60.8	1006.56
3xFLAG::FBF-2 IP	Protein MYO-3 [Caenorhabditis elegans]	225515	23	26	0.15	YAILAADAAKESDPK	12.6	1562.81
3xFLAG::FBF-2 IP	Protein LYS-1 [Caenorhabditis elegans]	32379.4	3	3	0.161	GFTPFGSGAFDTTSVTSIR	84.4	1947.94
3xFLAG::FBF-2 IP	Protein LYS-1 [Caenorhabditis elegans]	32379.4	3	3	0.161	SATTNVNFLNSIISR	95.5	1636.87
3xFLAG::FBF-2 IP	Protein LYS-1 [Caenorhabditis elegans]	32379.4	3	3	0.161	SVWIQVTSPANWQK	63.8	1643.85
3xFLAG::FBF-2 IP	Protein RPL-7A, isoform a [Caenorhabditis elegans]	27939.1	3	3	0.117	KHWGGGVMSAK	26.1	1157.59
3xFLAG::FBF-2 IP	Protein RPL-7A, isoform a [Caenorhabditis elegans]	27939.1	3	3	0.117	NFNIGQDIQPK	30.5	1273.65
3xFLAG::FBF-2 IP	Protein RPL-7A, isoform a [Caenorhabditis elegans]	27939.1	3	3	0.117	VAAVPAHIR	37.1	933.563
3xFLAG::FBF-2 IP	Protein MLC-3, isoform a [Caenorhabditis elegans]	17145.1	2	2	0.144	AAGLKPTQAMVTK	55.8	1315.74
3xFLAG::FBF-2 IP	Protein MLC-3, isoform a [Caenorhabditis elegans]	17145.1	2	2	0.144	HILLALGER	44.2	1021.62
3xFLAG::FBF-2 IP	Protein EEF-2, isoform a [Caenorhabditis elegans]	94797.6	2	2	0.0458	LLEPVYLVEIQCPEAAVGGIYGVLNR	41	2873.51
3xFLAG::FBF-2 IP	Protein EEF-2, isoform a [Caenorhabditis elegans]	94797.6	2	2	0.0458	RVFYASVLTAEPR	35	1508.82
3xFLAG::FBF-2 IP	Protein RPL-2 [Caenorhabditis elegans]	28204	2	2	0.108	ASGNYATVIAHNPDTK	105	1658.81
3xFLAG::FBF-2 IP	Protein RPL-2 [Caenorhabditis elegans]	28204	2	2	0.108	GLVKDIIHDPGR	24.3	1319.74
3xFLAG::FBF-2 IP	Protein SUF-1 [Caenorhabditis elegans]	84624.5	1	1	0.034	NVPTHGPQAASAIMGGAGGHADVAR	23.7	2342.14
3xFLAG::FBF-2 IP	Protein LEC-2, isoform b [Caenorhabditis elegans]	131928	1	1	0.0288	FDEKHVVR	33.8	1029.55
3xFLAG::FBF-2 IP	Protein MEL-26, isoform a [Caenorhabditis elegans]	44934.5	2	2	0.0658	IHPNPSHSDYVSYIKR	28	1912.97
3xFLAG::FBF-2 IP	Protein MEL-26, isoform a [Caenorhabditis elegans]	44934.5	2	2	0.0658	TAENKDIEMR	55.5	1206.58
3xFLAG::FBF-2 IP	Protein ACT-5 [Caenorhabditis elegans]	41873.7	7	11	0.552	AGFAGDDAPR	63	976.448
3xFLAG::FBF-2 IP	Protein ACT-5 [Caenorhabditis elegans]	41873.7	7	11	0.552	AGFAGDDAPRAVFPSIVGRPR	33.6	2156.14
3xFLAG::FBF-2 IP	Protein ACT-5 [Caenorhabditis elegans]	41873.7	7	11	0.552	AVFPSIVGRPR	54.3	1198.71
3xFLAG::FBF-2 IP	Protein ACT-5 [Caenorhabditis elegans]	41873.7	7	11	0.552	DSYVGDEAQSK	58	1198.52
3xFLAG::FBF-2 IP	Protein ACT-5 [Caenorhabditis elegans]	41873.7	7	11	0.552	DSYVGDEAQSKR	64.4	1354.62
3xFLAG::FBF-2 IP	Protein ACT-5 [Caenorhabditis elegans]	41873.7	7	11	0.552	EEEIAALVVDNGSGMCKAGFAGDDAPR	85.8	2779.27
3xFLAG::FBF-2 IP	Protein ACT-5 [Caenorhabditis elegans]	41873.7	7	11	0.552	EIQHLAPSTMK	51	1254.65
3xFLAG::FBF-2 IP	Protein ACT-5 [Caenorhabditis elegans]	41873.7	7	11	0.552	GYTFTTTAER	41.5	1146.54
3xFLAG::FBF-2 IP	Protein ACT-5 [Caenorhabditis elegans]	41873.7	7	11	0.552	HQGVMVGMGQK	61.8	1171.57
3xFLAG::FBF-2 IP	Protein ACT-5 [Caenorhabditis elegans]	41873.7	7	11	0.552	HQGVMVGMGQKDSYVGDEAQSK	64.4	2351.08
3xFLAG::FBF-2 IP	Protein ACT-5 [Caenorhabditis elegans]	41873.7	7	11	0.552	IAPEEHPVLLTEAPLNPK	41.6	1968.08
3xFLAG::FBF-2 IP	Protein ACT-5 [Caenorhabditis elegans]	41873.7	7	11	0.552	IIAPPER	32.7	795.472
3xFLAG::FBF-2 IP	Protein ACT-5 [Caenorhabditis elegans]	41873.7	7	11	0.552	IIAPPERK	34.6	923.567
3xFLAG::FBF-2 IP	Protein ACT-5 [Caenorhabditis elegans]	41873.7	7	11	0.552	IKIIAPPER	30.8	1036.65
3xFLAG::FBF-2 IP	Protein ACT-5 [Caenorhabditis elegans]	41873.7	7	11	0.552	IWHHTFYNELR	35.5	1515.75
3xFLAG::FBF-2 IP	Protein ACT-5 [Caenorhabditis elegans]	41873.7	7	11	0.552	MQKEIQHLAPSTMK	38.5	1641.85
3xFLAG::FBF-2 IP	Protein ACT-5 [Caenorhabditis elegans]	41873.7	7	11	0.552	QEYDESGPSIVHR	62.4	1516.7
3xFLAG::FBF-2 IP	Protein ACT-5 [Caenorhabditis elegans]	41873.7	7	11	0.552	QEYDESGPSIVHRK	71.2	1644.8
3xFLAG::FBF-2 IP	Protein ACT-5 [Caenorhabditis elegans]	41873.7	7	11	0.552	SYELPDGQVITIGNER	80.5	1790.89
3xFLAG::FBF-2 IP	Protein ACT-5 [Caenorhabditis elegans]	41873.7	7	11	0.552	TTGIVLDTGDGVTHTVPIYEGYALPHAIQR	82.4	3195.63
3xFLAG::FBF-2 IP	Protein ACT-5 [Caenorhabditis elegans]	41873.7	7	11	0.552	YSVWIGGSILASLSTFQQMWISKQEYDESGPSIVHR	109	4100.02
3xFLAG::FBF-2 IP	Protein Y38F1A.6 [Caenorhabditis elegans]	50507.6	1	1	0.0237	SCVADDYPKEK	34.9	1311.59
3xFLAG::FBF-2 IP	Protein ACT-3 [Caenorhabditis elegans]	41796.6	2	11	0.878	AGFAGDDAPR	63	976.448
3xFLAG::FBF-2 IP	Protein ACT-3 [Caenorhabditis elegans]	41796.6	2	11	0.878	AGFAGDDAPRAVFPSIVGRPR	33.6	2156.14
3xFLAG::FBF-2 IP	Protein ACT-3 [Caenorhabditis elegans]	41796.6	2	11	0.878	AVFPSIVGRPR	54.3	1198.71
3xFLAG::FBF-2 IP	Protein ACT-3 [Caenorhabditis elegans]	41796.6	2	11	0.878	CDIDIRK	39.2	919.467
3xFLAG::FBF-2 IP	Protein ACT-3 [Caenorhabditis elegans]	41796.6	2	11	0.878	CPEAMFQPSFLGMESAGIHETSYNSIMK	82.3	3162.4
3xFLAG::FBF-2 IP	Protein ACT-3 [Caenorhabditis elegans]	41796.6	2	11	0.878	DLTDYLMK	43.5	998.486
3xFLAG::FBF-2 IP	Protein ACT-3 [Caenorhabditis elegans]	41796.6	2	11	0.878	DLYANTVLSGGTTMYPGIADR	106	2215.07
3xFLAG::FBF-2 IP	Protein ACT-3 [Caenorhabditis elegans]	41796.6	2	11	0.878	DLYANTVLSGGTTMYPGIADRMQK	57.5	2602.26
3xFLAG::FBF-2 IP	Protein ACT-3 [Caenorhabditis elegans]	41796.6	2	11	0.878	DSYVGDEAQSK	58	1198.52
3xFLAG::FBF-2 IP	Protein ACT-3 [Caenorhabditis elegans]	41796.6	2	11	0.878	DSYVGDEAQSKR	64.4	1354.62
3xFLAG::FBF-2 IP	Protein ACT-3 [Caenorhabditis elegans]	41796.6	2	11	0.878	EITALAPSTMKIK	37.5	1418.79
3xFLAG::FBF-2 IP	Protein ACT-3 [Caenorhabditis elegans]	41796.6	2	11	0.878	EKLCYVALDFEQEMATAASSSSLEK	82.3	2807.31
3xFLAG::FBF-2 IP	Protein ACT-3 [Caenorhabditis elegans]	41796.6	2	11	0.878	EKMTQIMFETFNTPAMYVAIQAVLSLYASGR	40	3526.74
3xFLAG::FBF-2 IP	Protein ACT-3 [Caenorhabditis elegans]	41796.6	2	11	0.878	FRCPEAMFQPSFLGMESAGIHETSYNSIMK	51.7	3481.57
3xFLAG::FBF-2 IP	Protein ACT-3 [Caenorhabditis elegans]	41796.6	2	11	0.878	GYSFTTTAER	55.7	1132.53
3xFLAG::FBF-2 IP	Protein ACT-3 [Caenorhabditis elegans]	41796.6	2	11	0.878	GYSFTTTAEREIVR	32.9	1629.82
3xFLAG::FBF-2 IP	Protein ACT-3 [Caenorhabditis elegans]	41796.6	2	11	0.878	HQGVMVGMGQK	61.8	1171.57
3xFLAG::FBF-2 IP	Protein ACT-3 [Caenorhabditis elegans]	41796.6	2	11	0.878	HQGVMVGMGQKDSYVGDEAQSK	64.4	2351.08
3xFLAG::FBF-2 IP	Protein ACT-3 [Caenorhabditis elegans]	41796.6	2	11	0.878	IIAPPER	32.7	795.472
3xFLAG::FBF-2 IP	Protein ACT-3 [Caenorhabditis elegans]	41796.6	2	11	0.878	IIAPPERK	34.6	923.567
3xFLAG::FBF-2 IP	Protein ACT-3 [Caenorhabditis elegans]	41796.6	2	11	0.878	IKIIAPPER	30.8	1036.65
3xFLAG::FBF-2 IP	Protein ACT-3 [Caenorhabditis elegans]	41796.6	2	11	0.878	ILTERGYSFTTTAER	31	1744.89
3xFLAG::FBF-2 IP	Protein ACT-3 [Caenorhabditis elegans]	41796.6	2	11	0.878	IWHHTFYNELR	35.5	1515.75
3xFLAG::FBF-2 IP	Protein ACT-3 [Caenorhabditis elegans]	41796.6	2	11	0.878	KDLYANTVLSGGTTMYPGIADR	91.2	2343.17
3xFLAG::FBF-2 IP	Protein ACT-3 [Caenorhabditis elegans]	41796.6	2	11	0.878	LCYVALDFEQEMATAASSSSLEK	133	2550.17
3xFLAG::FBF-2 IP	Protein ACT-3 [Caenorhabditis elegans]	41796.6	2	11	0.878	LCYVALDFEQEMATAASSSSLEKSYELPDGQVITVGNER	130	4308.03
3xFLAG::FBF-2 IP	Protein ACT-3 [Caenorhabditis elegans]	41796.6	2	11	0.878	LDLAGRDLTDYLMK	40	1623.84
3xFLAG::FBF-2 IP	Protein ACT-3 [Caenorhabditis elegans]	41796.6	2	11	0.878	MQKEITALAPSTMK	87.7	1564.81
3xFLAG::FBF-2 IP	Protein ACT-3 [Caenorhabditis elegans]	41796.6	2	11	0.878	MTQIMFETFNTPAMYVAIQAVLSLYASGR	59.6	3253.61
3xFLAG::FBF-2 IP	Protein ACT-3 [Caenorhabditis elegans]	41796.6	2	11	0.878	MTQIMFETFNTPAMYVAIQAVLSLYASGRTTGVVLDSGDGVTHTVPIYEGYALPHAILR	41.3	6387.22
3xFLAG::FBF-2 IP	Protein ACT-3 [Caenorhabditis elegans]	41796.6	2	11	0.878	QEYDESGPSIVHR	62.4	1516.7
3xFLAG::FBF-2 IP	Protein ACT-3 [Caenorhabditis elegans]	41796.6	2	11	0.878	QEYDESGPSIVHRK	71.2	1644.8
3xFLAG::FBF-2 IP	Protein ACT-3 [Caenorhabditis elegans]	41796.6	2	11	0.878	SYELPDGQVITVGNER	103	1776.88
3xFLAG::FBF-2 IP	Protein ACT-3 [Caenorhabditis elegans]	41796.6	2	11	0.878	SYELPDGQVITVGNERFR	54.6	2080.05
3xFLAG::FBF-2 IP	Protein ACT-3 [Caenorhabditis elegans]	41796.6	2	11	0.878	TTGVVLDSGDGVTHTVPIYEGYALPHAILR	96.6	3151.64
3xFLAG::FBF-2 IP	Protein ACT-3 [Caenorhabditis elegans]	41796.6	2	11	0.878	TTGVVLDSGDGVTHTVPIYEGYALPHAILRLDLAGR	36.2	3777
3xFLAG::FBF-2 IP	Protein ACT-3 [Caenorhabditis elegans]	41796.6	2	11	0.878	VAPEEHPVLLTEAPLNPK	64.2	1954.06
3xFLAG::FBF-2 IP	Protein ACT-3 [Caenorhabditis elegans]	41796.6	2	11	0.878	VAPEEHPVLLTEAPLNPKANR	72.4	2295.25
3xFLAG::FBF-2 IP	Protein ACT-3 [Caenorhabditis elegans]	41796.6	2	11	0.878	YSVWIGGSILASLSTFQQMWISKQEYDESGPSIVHR	109	4100.02
3xFLAG::FBF-2 IP	Protein F46G10.1, isoform a [Caenorhabditis elegans]	20368.7	18	33	0.854	ANTNDIVDIR	81.1	1131.56
3xFLAG::FBF-2 IP	Protein F46G10.1, isoform a [Caenorhabditis elegans]	20368.7	18	33	0.854	ANTNDIVDIRNSVNQIANNTYYNNGGR	81.2	3011.42
3xFLAG::FBF-2 IP	Protein F46G10.1, isoform a [Caenorhabditis elegans]	20368.7	18	33	0.854	ASLHSNGVDMHTAEYADYK	77.3	2109.92
3xFLAG::FBF-2 IP	Protein F46G10.1, isoform a [Caenorhabditis elegans]	20368.7	18	33	0.854	ASLHSNGVDMHTAEYADYKK	52.9	2237.03
3xFLAG::FBF-2 IP	Protein F46G10.1, isoform a [Caenorhabditis elegans]	20368.7	18	33	0.854	DGKNTVLPK	30.9	971.552
3xFLAG::FBF-2 IP	Protein F46G10.1, isoform a [Caenorhabditis elegans]	20368.7	18	33	0.854	DIVHINAGGTR	46.6	1152.61
3xFLAG::FBF-2 IP	Protein F46G10.1, isoform a [Caenorhabditis elegans]	20368.7	18	33	0.854	DIVHINAGGTRFTTLYDTLAQSK	32.2	2521.3
3xFLAG::FBF-2 IP	Protein F46G10.1, isoform a [Caenorhabditis elegans]	20368.7	18	33	0.854	EADFFGMEVFK	53.4	1319.6
3xFLAG::FBF-2 IP	Protein F46G10.1, isoform a [Caenorhabditis elegans]	20368.7	18	33	0.854	FTTLYDTLAQSK	80.3	1387.71
3xFLAG::FBF-2 IP	Protein F46G10.1, isoform a [Caenorhabditis elegans]	20368.7	18	33	0.854	IVLLQQR	36	869.557
3xFLAG::FBF-2 IP	Protein F46G10.1, isoform a [Caenorhabditis elegans]	20368.7	18	33	0.854	LFAFVLQFMR	68.4	1271.7
3xFLAG::FBF-2 IP	Protein F46G10.1, isoform a [Caenorhabditis elegans]	20368.7	18	33	0.854	NSVNQIANNTYYNNGGR	83.6	1898.87
3xFLAG::FBF-2 IP	Protein F46G10.1, isoform a [Caenorhabditis elegans]	20368.7	18	33	0.854	NSVNQIANNTYYNNGGRI	96.5	2011.96
3xFLAG::FBF-2 IP	Protein F46G10.1, isoform a [Caenorhabditis elegans]	20368.7	18	33	0.854	SSYFLNFIR	44.5	1146.59
3xFLAG::FBF-2 IP	Protein F46G10.1, isoform a [Caenorhabditis elegans]	20368.7	18	33	0.854	SSYFLNFIRIDR	26	1530.81
3xFLAG::FBF-2 IP	Protein F46G10.1, isoform a [Caenorhabditis elegans]	20368.7	18	33	0.854	TIRDESGAIFVNR	42.7	1477.78
3xFLAG::FBF-2 IP	Protein F46G10.1, isoform a [Caenorhabditis elegans]	20368.7	18	33	0.854	TSGKIVLLQQR	33.6	1242.75
3xFLAG::FBF-2 IP	Protein F46G10.1, isoform a [Caenorhabditis elegans]	20368.7	18	33	0.854	YLIQETLVDIEKEQR	83.1	1877
3xFLAG::FBF-2 IP	Protein R12C12.1, isoform a [Caenorhabditis elegans]	108868	10	11	0.135	FGVPLGYGGPHAGFMAVAK	28.9	1875.96
3xFLAG::FBF-2 IP	Protein R12C12.1, isoform a [Caenorhabditis elegans]	108868	10	11	0.135	FGVPLGYGGPHAGFMAVAKHDAK	20.7	2327.18
3xFLAG::FBF-2 IP	Protein R12C12.1, isoform a [Caenorhabditis elegans]	108868	10	11	0.135	HGIEVVDIAK	38.7	1080.6
3xFLAG::FBF-2 IP	Protein R12C12.1, isoform a [Caenorhabditis elegans]	108868	10	11	0.135	HGIEVVDIAKR	62	1236.71
3xFLAG::FBF-2 IP	Protein R12C12.1, isoform a [Caenorhabditis elegans]	108868	10	11	0.135	MAPHTLEKVTSDNWNMPYSR	64.2	2377.11
3xFLAG::FBF-2 IP	Protein R12C12.1, isoform a [Caenorhabditis elegans]	108868	10	11	0.135	NICLIPTSAHGTNPASAQMANMK	39.8	2427.16
3xFLAG::FBF-2 IP	Protein R12C12.1, isoform a [Caenorhabditis elegans]	108868	10	11	0.135	NKIVVDSFCHPQNLDVIR	28	2154.11
3xFLAG::FBF-2 IP	Protein R12C12.1, isoform a [Caenorhabditis elegans]	108868	10	11	0.135	NYLIHKGEEQR	23.8	1386.71
3xFLAG::FBF-2 IP	Protein R12C12.1, isoform a [Caenorhabditis elegans]	108868	10	11	0.135	SPGDLGADIAVGSAQR	105	1513.76
3xFLAG::FBF-2 IP	Protein R12C12.1, isoform a [Caenorhabditis elegans]	108868	10	11	0.135	STAYLAYHLR	49.1	1194.63
3xFLAG::FBF-2 IP	Protein RPL-23 [Caenorhabditis elegans]	14954.8	3	3	0.286	DGTFIYFEDNAGVIVNNKGEMK	2.04	2461.17
3xFLAG::FBF-2 IP	Protein RPL-23 [Caenorhabditis elegans]	14954.8	3	3	0.286	GSAITGPVAK	48.3	900.515
3xFLAG::FBF-2 IP	Protein RPL-23 [Caenorhabditis elegans]	14954.8	3	3	0.286	VLQGVVIR	58.2	883.572
3xFLAG::FBF-2 IP	Protein RPS-8, isoform a [Caenorhabditis elegans]	23751.3	3	3	0.216	ALRLDSGNFSWASEQTTR	28.9	2038.99
3xFLAG::FBF-2 IP	Protein RPS-8, isoform a [Caenorhabditis elegans]	23751.3	3	3	0.216	IVDTMYNATNNELVR	79.6	1752.86
3xFLAG::FBF-2 IP	Protein RPS-8, isoform a [Caenorhabditis elegans]	23751.3	3	3	0.216	KFELGRPAANTK	29.8	1331.74
3xFLAG::FBF-2 IP	Protein KETN-1, isoform e [Caenorhabditis elegans]	554864	56	60	0.181	AAAPEKPDAEHDAPQFIEPLDSIDRMEFQSAHFQTK	39.3	4066.92
3xFLAG::FBF-2 IP	Protein KETN-1, isoform e [Caenorhabditis elegans]	554864	56	60	0.181	AAILGDTQHEQSWQR	79.6	1739.85
3xFLAG::FBF-2 IP	Protein KETN-1, isoform e [Caenorhabditis elegans]	554864	56	60	0.181	AENSLGQAETVATIR	95.9	1559.8
3xFLAG::FBF-2 IP	Protein KETN-1, isoform e [Caenorhabditis elegans]	554864	56	60	0.181	AFETVTFSAK	54.1	1100.56
3xFLAG::FBF-2 IP	Protein KETN-1, isoform e [Caenorhabditis elegans]	554864	56	60	0.181	AFNKLGESENQATIIIVPK	56.1	2072.14
3xFLAG::FBF-2 IP	Protein KETN-1, isoform e [Caenorhabditis elegans]	554864	56	60	0.181	AGEAQSTVDINCGHTGGNFTDSFHPNSLHR	45.4	3227.42
3xFLAG::FBF-2 IP	Protein KETN-1, isoform e [Caenorhabditis elegans]	554864	56	60	0.181	APDFSAR	33	763.373
3xFLAG::FBF-2 IP	Protein KETN-1, isoform e [Caenorhabditis elegans]	554864	56	60	0.181	AQSPIEPMESQELIQK	71.1	1827.92
3xFLAG::FBF-2 IP	Protein KETN-1, isoform e [Caenorhabditis elegans]	554864	56	60	0.181	ASSVANLVLTPR	53.9	1227.71
3xFLAG::FBF-2 IP	Protein KETN-1, isoform e [Caenorhabditis elegans]	554864	56	60	0.181	ATNQHGSDEVSTELK	36.6	1615.76
3xFLAG::FBF-2 IP	Protein KETN-1, isoform e [Caenorhabditis elegans]	554864	56	60	0.181	AVEILEDNLR	64.3	1171.63
3xFLAG::FBF-2 IP	Protein KETN-1, isoform e [Caenorhabditis elegans]	554864	56	60	0.181	AVNRVGEAVTSTK	58	1331.73
3xFLAG::FBF-2 IP	Protein KETN-1, isoform e [Caenorhabditis elegans]	554864	56	60	0.181	AVSAFGEAATSCTVK	89	1498.72
3xFLAG::FBF-2 IP	Protein KETN-1, isoform e [Caenorhabditis elegans]	554864	56	60	0.181	CAPKDAILGAVQHPR	38.4	1632.86
3xFLAG::FBF-2 IP	Protein KETN-1, isoform e [Caenorhabditis elegans]	554864	56	60	0.181	DNKNIYWSEQGGAVQPK	40.7	1933.94
3xFLAG::FBF-2 IP	Protein KETN-1, isoform e [Caenorhabditis elegans]	554864	56	60	0.181	EGIISATQLPER	47.4	1313.71
3xFLAG::FBF-2 IP	Protein KETN-1, isoform e [Caenorhabditis elegans]	554864	56	60	0.181	FTSQIQPIVVDEGKGAQFSAQFSGFPDPTIR	84.5	3368.68
3xFLAG::FBF-2 IP	Protein KETN-1, isoform e [Caenorhabditis elegans]	554864	56	60	0.181	FVTQLNSSLGELQEGVPIHLEAQVEPTNDNQLTVQWFHNGQPLANGHR	56.2	5365.62
3xFLAG::FBF-2 IP	Protein KETN-1, isoform e [Caenorhabditis elegans]	554864	56	60	0.181	GGSASYQSSDKAAADSPHFIAK	68.3	2196.02
3xFLAG::FBF-2 IP	Protein KETN-1, isoform e [Caenorhabditis elegans]	554864	56	60	0.181	GMELEEVNLK	65.6	1161.58
3xFLAG::FBF-2 IP	Protein KETN-1, isoform e [Caenorhabditis elegans]	554864	56	60	0.181	GTIYTDSQHPESWQK	62.5	1776.82
3xFLAG::FBF-2 IP	Protein KETN-1, isoform e [Caenorhabditis elegans]	554864	56	60	0.181	GTIYTDSQHPESWQKIQVLEAPR	19.7	2683.35
3xFLAG::FBF-2 IP	Protein KETN-1, isoform e [Caenorhabditis elegans]	554864	56	60	0.181	HGQTMISAK	25.4	972.493
3xFLAG::FBF-2 IP	Protein KETN-1, isoform e [Caenorhabditis elegans]	554864	56	60	0.181	HLIAADAGEYK	31	1187.61
3xFLAG::FBF-2 IP	Protein KETN-1, isoform e [Caenorhabditis elegans]	554864	56	60	0.181	HLIAADAGEYKCVATNVK	54.2	1960
3xFLAG::FBF-2 IP	Protein KETN-1, isoform e [Caenorhabditis elegans]	554864	56	60	0.181	ILYDSQHPVSWER	50.5	1629.8
3xFLAG::FBF-2 IP	Protein KETN-1, isoform e [Caenorhabditis elegans]	554864	56	60	0.181	IQEIEAPKPAPQEVPDLPHQPPAFVK	25	2875.54
3xFLAG::FBF-2 IP	Protein KETN-1, isoform e [Caenorhabditis elegans]	554864	56	60	0.181	IQVLEAPR	48	925.547
3xFLAG::FBF-2 IP	Protein KETN-1, isoform e [Caenorhabditis elegans]	554864	56	60	0.181	IQWFKDGQPLMNSNR	32.4	1833.91
3xFLAG::FBF-2 IP	Protein KETN-1, isoform e [Caenorhabditis elegans]	554864	56	60	0.181	ISCTNEFGVATLLIK	107	1665.89
3xFLAG::FBF-2 IP	Protein KETN-1, isoform e [Caenorhabditis elegans]	554864	56	60	0.181	ISDAGEVVAIAR	81.4	1200.66
3xFLAG::FBF-2 IP	Protein KETN-1, isoform e [Caenorhabditis elegans]	554864	56	60	0.181	IWNPEGEAVSSATLK	87.8	1601.82
3xFLAG::FBF-2 IP	Protein KETN-1, isoform e [Caenorhabditis elegans]	554864	56	60	0.181	LACQGASHVITDSQMPQGLR	59.7	2169.05
3xFLAG::FBF-2 IP	Protein KETN-1, isoform e [Caenorhabditis elegans]	554864	56	60	0.181	LTCTPKEGIISATQLPER	27	2014.06
3xFLAG::FBF-2 IP	Protein KETN-1, isoform e [Caenorhabditis elegans]	554864	56	60	0.181	LTTDFGYISLDIAHTVPEDSGVYSVK	35.2	2827.4
3xFLAG::FBF-2 IP	Protein KETN-1, isoform e [Caenorhabditis elegans]	554864	56	60	0.181	LVPVNDPNLR	34.8	1136.64
3xFLAG::FBF-2 IP	Protein KETN-1, isoform e [Caenorhabditis elegans]	554864	56	60	0.181	NAAGEAVSTATIEVQGKEVILQDSLQPQSLDR	60.4	3369.7
3xFLAG::FBF-2 IP	Protein KETN-1, isoform e [Caenorhabditis elegans]	554864	56	60	0.181	NEDVAEYKVEASNPAGK	41.7	1820.87
3xFLAG::FBF-2 IP	Protein KETN-1, isoform e [Caenorhabditis elegans]	554864	56	60	0.181	NGQPLPEASR	36.5	1069.53
3xFLAG::FBF-2 IP	Protein KETN-1, isoform e [Caenorhabditis elegans]	554864	56	60	0.181	NGVPLAHGSK	22.7	980.516
3xFLAG::FBF-2 IP	Protein KETN-1, isoform e [Caenorhabditis elegans]	554864	56	60	0.181	NIYWSEQGGAVQPK	91.2	1576.78
3xFLAG::FBF-2 IP	Protein KETN-1, isoform e [Caenorhabditis elegans]	554864	56	60	0.181	NSEGEDRTSGQLSCTTR	76.8	1897.83
3xFLAG::FBF-2 IP	Protein KETN-1, isoform e [Caenorhabditis elegans]	554864	56	60	0.181	NSLGEAQTIANFTVLPR	56.2	1830.97
3xFLAG::FBF-2 IP	Protein KETN-1, isoform e [Caenorhabditis elegans]	554864	56	60	0.181	NTEGETISTATLDIFQNDDFRQTK	81.1	2744.3
3xFLAG::FBF-2 IP	Protein KETN-1, isoform e [Caenorhabditis elegans]	554864	56	60	0.181	QAPQFTIPLR	48.9	1170.66
3xFLAG::FBF-2 IP	Protein KETN-1, isoform e [Caenorhabditis elegans]	554864	56	60	0.181	QTLSHGFASLDIPQTSSNDSGLYSCR	43.7	2841.31
3xFLAG::FBF-2 IP	Protein KETN-1, isoform e [Caenorhabditis elegans]	554864	56	60	0.181	SDGTVIQSGGK	41.6	1048.53
3xFLAG::FBF-2 IP	Protein KETN-1, isoform e [Caenorhabditis elegans]	554864	56	60	0.181	SPEAPEFTGK	46.5	1062.51
3xFLAG::FBF-2 IP	Protein KETN-1, isoform e [Caenorhabditis elegans]	554864	56	60	0.181	SRTPVNQLQDVSASK	90.3	1629.86
3xFLAG::FBF-2 IP	Protein KETN-1, isoform e [Caenorhabditis elegans]	554864	56	60	0.181	SSPKFEGSLQSQQLVEGQSAR	76.2	2263.13
3xFLAG::FBF-2 IP	Protein KETN-1, isoform e [Caenorhabditis elegans]	554864	56	60	0.181	TANGSANGSANGSAVHAANGGPSSQQAR	61.2	2541.13
3xFLAG::FBF-2 IP	Protein KETN-1, isoform e [Caenorhabditis elegans]	554864	56	60	0.181	TPVNQLQDVSASK	70.8	1386.72
3xFLAG::FBF-2 IP	Protein KETN-1, isoform e [Caenorhabditis elegans]	554864	56	60	0.181	TRHDFGYVALDILYAFAQDTGEWACVAR	81.3	3246.53
3xFLAG::FBF-2 IP	Protein KETN-1, isoform e [Caenorhabditis elegans]	554864	56	60	0.181	VTPQTDPNLR	22.5	1140.6
3xFLAG::FBF-2 IP	Protein KETN-1, isoform e [Caenorhabditis elegans]	554864	56	60	0.181	VVGTPTPSLTWQK	41.9	1413.77
3xFLAG::FBF-2 IP	Protein KETN-1, isoform e [Caenorhabditis elegans]	554864	56	60	0.181	YKIENGPDGSGR	30.5	1292.62
3xFLAG::FBF-2 IP	Protein T25F10.6, isoform a [Caenorhabditis elegans]	44367.9	40	78	0.81	AAAPPASLK	29.5	825.483
3xFLAG::FBF-2 IP	Protein T25F10.6, isoform a [Caenorhabditis elegans]	44367.9	40	78	0.81	AAAPPASLKSPTPGR	68.2	1420.79
3xFLAG::FBF-2 IP	Protein T25F10.6, isoform a [Caenorhabditis elegans]	44367.9	40	78	0.81	ARASDGIVPLQSGTNK	62.8	1613.86
3xFLAG::FBF-2 IP	Protein T25F10.6, isoform a [Caenorhabditis elegans]	44367.9	40	78	0.81	ASDGIVPLQSGTNK	73.7	1386.72
3xFLAG::FBF-2 IP	Protein T25F10.6, isoform a [Caenorhabditis elegans]	44367.9	40	78	0.81	ASDGIVPLQSGTNKLASQAGMTGIGMPR	69.6	2757.4
3xFLAG::FBF-2 IP	Protein T25F10.6, isoform a [Caenorhabditis elegans]	44367.9	40	78	0.81	DVIDKVK	29.5	816.483
3xFLAG::FBF-2 IP	Protein T25F10.6, isoform a [Caenorhabditis elegans]	44367.9	40	78	0.81	EADHANQTGMTAFGTPR	73.3	1803.81
3xFLAG::FBF-2 IP	Protein T25F10.6, isoform a [Caenorhabditis elegans]	44367.9	40	78	0.81	EGASQAGMTGFGAFRNNTVAFMQAQDQR	93.2	2990.36
3xFLAG::FBF-2 IP	Protein T25F10.6, isoform a [Caenorhabditis elegans]	44367.9	40	78	0.81	FANQAGMTGFGMPR	81.2	1484.68
3xFLAG::FBF-2 IP	Protein T25F10.6, isoform a [Caenorhabditis elegans]	44367.9	40	78	0.81	FASQKGQSGFGAVR	60.2	1439.74
3xFLAG::FBF-2 IP	Protein T25F10.6, isoform a [Caenorhabditis elegans]	44367.9	40	78	0.81	GDMPHDEGTLSR	50	1314.57
3xFLAG::FBF-2 IP	Protein T25F10.6, isoform a [Caenorhabditis elegans]	44367.9	40	78	0.81	GMTGFGVPR	55.2	921.461
3xFLAG::FBF-2 IP	Protein T25F10.6, isoform a [Caenorhabditis elegans]	44367.9	40	78	0.81	GQSGFGAVRDVNYK	72.3	1497.74
3xFLAG::FBF-2 IP	Protein T25F10.6, isoform a [Caenorhabditis elegans]	44367.9	40	78	0.81	GSTWLQSGTNK	72.7	1178.58
3xFLAG::FBF-2 IP	Protein T25F10.6, isoform a [Caenorhabditis elegans]	44367.9	40	78	0.81	GSTWLQSGTNKFASQK	88.9	1739.87
3xFLAG::FBF-2 IP	Protein T25F10.6, isoform a [Caenorhabditis elegans]	44367.9	40	78	0.81	GTGGASEVPEEK	62.5	1160.54
3xFLAG::FBF-2 IP	Protein T25F10.6, isoform a [Caenorhabditis elegans]	44367.9	40	78	0.81	GTGGASEVPEEKAR	42.3	1387.68
3xFLAG::FBF-2 IP	Protein T25F10.6, isoform a [Caenorhabditis elegans]	44367.9	40	78	0.81	IANLKGSTWLQSGTNK	78.2	1717.92
3xFLAG::FBF-2 IP	Protein T25F10.6, isoform a [Caenorhabditis elegans]	44367.9	40	78	0.81	KQQNYSSGKPSTIHTK	46.8	1803.93
3xFLAG::FBF-2 IP	Protein T25F10.6, isoform a [Caenorhabditis elegans]	44367.9	40	78	0.81	LASQAGMTGIGMPR	92.7	1405.69
3xFLAG::FBF-2 IP	Protein T25F10.6, isoform a [Caenorhabditis elegans]	44367.9	40	78	0.81	LMRSEGIIPIQAGSNK	43.5	1713.93
3xFLAG::FBF-2 IP	Protein T25F10.6, isoform a [Caenorhabditis elegans]	44367.9	40	78	0.81	NNTVAFMQAQDQR	86.3	1522.71
3xFLAG::FBF-2 IP	Protein T25F10.6, isoform a [Caenorhabditis elegans]	44367.9	40	78	0.81	QQNYSSGKPSTIHTK	62.9	1675.84
3xFLAG::FBF-2 IP	Protein T25F10.6, isoform a [Caenorhabditis elegans]	44367.9	40	78	0.81	QQVNFTPSIPQSVLR	49.1	1713.93
3xFLAG::FBF-2 IP	Protein T25F10.6, isoform a [Caenorhabditis elegans]	44367.9	40	78	0.81	QQVNFTPSIPQSVLRK	30.3	1842.02
3xFLAG::FBF-2 IP	Protein T25F10.6, isoform a [Caenorhabditis elegans]	44367.9	40	78	0.81	QTSGWKEGASQAGMTGFGAFR	115	2174.01
3xFLAG::FBF-2 IP	Protein T25F10.6, isoform a [Caenorhabditis elegans]	44367.9	40	78	0.81	QVYTPFTDDTHEDLPADIAR	104	2304.08
3xFLAG::FBF-2 IP	Protein T25F10.6, isoform a [Caenorhabditis elegans]	44367.9	40	78	0.81	RPDVPFWTGQK	46.3	1330.69
3xFLAG::FBF-2 IP	Protein T25F10.6, isoform a [Caenorhabditis elegans]	44367.9	40	78	0.81	RPDVPFWTGQKEADHANQTGMTAFGTPR	65.2	3115.48
3xFLAG::FBF-2 IP	Protein T25F10.6, isoform a [Caenorhabditis elegans]	44367.9	40	78	0.81	SDNLAEITDEK	70.7	1234.58
3xFLAG::FBF-2 IP	Protein T25F10.6, isoform a [Caenorhabditis elegans]	44367.9	40	78	0.81	SDNLAEITDEKK	62.2	1362.67
3xFLAG::FBF-2 IP	Protein T25F10.6, isoform a [Caenorhabditis elegans]	44367.9	40	78	0.81	SEGIIPIQAGSNK	64.7	1313.71
3xFLAG::FBF-2 IP	Protein T25F10.6, isoform a [Caenorhabditis elegans]	44367.9	40	78	0.81	SEGIIPIQAGSNKYASQK	81.1	1890.99
3xFLAG::FBF-2 IP	Protein T25F10.6, isoform a [Caenorhabditis elegans]	44367.9	40	78	0.81	SPTPGRQQVNFTPSIPQSVLR	28.9	2309.24
3xFLAG::FBF-2 IP	Protein T25F10.6, isoform a [Caenorhabditis elegans]	44367.9	40	78	0.81	SQGMIPYQMGVNFLESQAGK	95.2	2185.04
3xFLAG::FBF-2 IP	Protein T25F10.6, isoform a [Caenorhabditis elegans]	44367.9	40	78	0.81	SQGMIPYQMGVNFLESQAGKTGFGQPR	51	2928.41
3xFLAG::FBF-2 IP	Protein T25F10.6, isoform a [Caenorhabditis elegans]	44367.9	40	78	0.81	TGFGQPR	32.1	762.389
3xFLAG::FBF-2 IP	Protein T25F10.6, isoform a [Caenorhabditis elegans]	44367.9	40	78	0.81	TKGTGGASEVPEEK	69.2	1389.69
3xFLAG::FBF-2 IP	Protein T25F10.6, isoform a [Caenorhabditis elegans]	44367.9	40	78	0.81	TNDQDRDSQGFIHLQMGTNK	32.6	2305.06
3xFLAG::FBF-2 IP	Protein T25F10.6, isoform a [Caenorhabditis elegans]	44367.9	40	78	0.81	YASQKGMTGFGVPR	42.5	1498.75
3xFLAG::FBF-2 IP	Protein RPS-23, isoform a [Caenorhabditis elegans]	15874.8	2	2	0.0909	SNPFGGASHAK	31.6	1072.52
3xFLAG::FBF-2 IP	Protein RPS-23, isoform a [Caenorhabditis elegans]	15874.8	2	2	0.0909	WKSNPFGGASHAK	20.7	1386.69
3xFLAG::FBF-2 IP	Protein ATP-2 [Caenorhabditis elegans]	57527.3	1	1	0.0297	IMDPNVVGQNHYDIAR	37.5	1841.9
3xFLAG::FBF-2 IP	Protein PQN-22, isoform c [Caenorhabditis elegans]	115670	5	5	0.158	LQPSGGYSYENYSSSR	89.9	1794.79
3xFLAG::FBF-2 IP	Protein PQN-22, isoform c [Caenorhabditis elegans]	115670	5	5	0.158	QYSSNATSNYPSQTQQYQQQQHQYQSDHSNAQR	49.6	3930.7
3xFLAG::FBF-2 IP	Protein PQN-22, isoform c [Caenorhabditis elegans]	115670	5	5	0.158	SYSSQTTTQHQPQPVAANNNYSTSYHTER	23.6	3297.48
3xFLAG::FBF-2 IP	Protein PQN-22, isoform c [Caenorhabditis elegans]	115670	5	5	0.158	VTGGGTGAPVSNNYSNQNYSSSAYNSQSSQHQTK	117	3522.53
3xFLAG::FBF-2 IP	Protein PQN-22, isoform c [Caenorhabditis elegans]	115670	5	5	0.158	YTADSHDPCNVAIAPNLEGVDANLLVGDTLSNQK	60.1	3613.7
3xFLAG::FBF-2 IP	Protein CPF-1 [Caenorhabditis elegans]	47962.1	14	18	0.5	AAAFNSDGSLVATGSADCSIK	112	2041.95
3xFLAG::FBF-2 IP	Protein CPF-1 [Caenorhabditis elegans]	47962.1	14	18	0.5	AAAFNSDGSLVATGSADCSIKIMDVER	32.7	2786.3
3xFLAG::FBF-2 IP	Protein CPF-1 [Caenorhabditis elegans]	47962.1	14	18	0.5	ALSCHPGGEFLLVATDHPTVR	50.6	2277.14
3xFLAG::FBF-2 IP	Protein CPF-1 [Caenorhabditis elegans]	47962.1	14	18	0.5	DSILISGSNDKTVK	62.6	1476.79
3xFLAG::FBF-2 IP	Protein CPF-1 [Caenorhabditis elegans]	47962.1	14	18	0.5	FWYRKPATNEH	22.4	1448.71
3xFLAG::FBF-2 IP	Protein CPF-1 [Caenorhabditis elegans]	47962.1	14	18	0.5	IWDGVSNR	30.5	946.474
3xFLAG::FBF-2 IP	Protein CPF-1 [Caenorhabditis elegans]	47962.1	14	18	0.5	LLALGHTSACR	57.9	1198.64
3xFLAG::FBF-2 IP	Protein CPF-1 [Caenorhabditis elegans]	47962.1	14	18	0.5	LYNIETAQAYASANPDDQHTESVTDVHYSENAR	46.6	3709.66
3xFLAG::FBF-2 IP	Protein CPF-1 [Caenorhabditis elegans]	47962.1	14	18	0.5	QFVEDPDYKAEEK	51.6	1597.74
3xFLAG::FBF-2 IP	Protein CPF-1 [Caenorhabditis elegans]	47962.1	14	18	0.5	SGSMCSWDAR	71	1156.45
3xFLAG::FBF-2 IP	Protein CPF-1 [Caenorhabditis elegans]	47962.1	14	18	0.5	TFVHSPSMPAFMTGSDDHRAR	33.4	2347.07
3xFLAG::FBF-2 IP	Protein CPF-1 [Caenorhabditis elegans]	47962.1	14	18	0.5	TLSEVYPVR	36	1063.58
3xFLAG::FBF-2 IP	Protein CPF-1 [Caenorhabditis elegans]	47962.1	14	18	0.5	TLYDHVDDVNTVIFHPR	53.7	2042
3xFLAG::FBF-2 IP	Protein CPF-1 [Caenorhabditis elegans]	47962.1	14	18	0.5	YILTSGMDSIVKLWELSTNR	52.2	2327.2
3xFLAG::FBF-2 IP	Protein UNC-15, isoform b [Caenorhabditis elegans]	63703.5	5	8	0.107	QLAESESVTMQNLQR	99.7	1733.85
3xFLAG::FBF-2 IP	Protein UNC-15, isoform b [Caenorhabditis elegans]	63703.5	5	8	0.107	RQLAESESVTMQNLQR	69.5	1889.95
3xFLAG::FBF-2 IP	Protein UNC-15, isoform b [Caenorhabditis elegans]	63703.5	5	8	0.107	SSSKIFVTEDDY	27.5	1390.64
3xFLAG::FBF-2 IP	Protein UNC-15, isoform b [Caenorhabditis elegans]	63703.5	5	8	0.107	VIAKLETR	24.9	929.578
3xFLAG::FBF-2 IP	Protein UNC-15, isoform b [Caenorhabditis elegans]	63703.5	5	8	0.107	YQHELEDAEGRADQAESSLHLIR	39.7	2668.26
3xFLAG::FBF-2 IP	Protein MYO-5 [Caenorhabditis elegans]	227004	1	1	0.0137	LQEKEEEFENTR	64.2	1551.73
3xFLAG::FBF-2 IP	Protein MYO-5 [Caenorhabditis elegans]	227004	1	1	0.0137	QIEDAESLASGNLAK	46.6	1545.78
3xFLAG::FBF-2 IP	Protein EEF-1A.1 [Caenorhabditis elegans]	50668.6	11	14	0.3	AVPFVPISGFNGDNMLEVSSNMPWFK	50.7	2884.37
3xFLAG::FBF-2 IP	Protein EEF-1A.1 [Caenorhabditis elegans]	50668.6	11	14	0.3	AVPFVPISGFNGDNMLEVSSNMPWFKGWAVER	49.4	3581.73
3xFLAG::FBF-2 IP	Protein EEF-1A.1 [Caenorhabditis elegans]	50668.6	11	14	0.3	DMRQTVAVGVIK	34.5	1316.74
3xFLAG::FBF-2 IP	Protein EEF-1A.1 [Caenorhabditis elegans]	50668.6	11	14	0.3	FTEITNEVSGFIK	66.7	1484.76
3xFLAG::FBF-2 IP	Protein EEF-1A.1 [Caenorhabditis elegans]	50668.6	11	14	0.3	FTEITNEVSGFIKK	55	1612.86
3xFLAG::FBF-2 IP	Protein EEF-1A.1 [Caenorhabditis elegans]	50668.6	11	14	0.3	KVEDFPK	37.5	862.467
3xFLAG::FBF-2 IP	Protein EEF-1A.1 [Caenorhabditis elegans]	50668.6	11	14	0.3	MDSTEPPFSEAR	45.3	1366.59
3xFLAG::FBF-2 IP	Protein EEF-1A.1 [Caenorhabditis elegans]	50668.6	11	14	0.3	QTVAVGVIK	51.4	914.567
3xFLAG::FBF-2 IP	Protein EEF-1A.1 [Caenorhabditis elegans]	50668.6	11	14	0.3	SGDAGIVELIPTKPLCVESFTDYAPLGR	52.2	3005.53
3xFLAG::FBF-2 IP	Protein EEF-1A.1 [Caenorhabditis elegans]	50668.6	11	14	0.3	STTTGHLIYK	36.6	1120.6
3xFLAG::FBF-2 IP	Protein EEF-1A.1 [Caenorhabditis elegans]	50668.6	11	14	0.3	VETGIIKPGMVVTFAPQNVTTEVK	36.1	2558.39
3xFLAG::FBF-2 IP	Protein ACT-4, isoform a [Caenorhabditis elegans]	40427.2	40	103	0.878	AGFAGDDAPR	63	976.448
3xFLAG::FBF-2 IP	Protein ACT-4, isoform a [Caenorhabditis elegans]	40427.2	40	103	0.878	AGFAGDDAPRAVFPSIVGRPR	33.6	2156.14
3xFLAG::FBF-2 IP	Protein ACT-4, isoform a [Caenorhabditis elegans]	40427.2	40	103	0.878	AVFPSIVGRPR	54.3	1198.71
3xFLAG::FBF-2 IP	Protein ACT-4, isoform a [Caenorhabditis elegans]	40427.2	40	103	0.878	CDIDIRK	39.2	919.467
3xFLAG::FBF-2 IP	Protein ACT-4, isoform a [Caenorhabditis elegans]	40427.2	40	103	0.878	CPEALFQPSFLGMESAGIHETSYNSIMK	66.8	3145.43
3xFLAG::FBF-2 IP	Protein ACT-4, isoform a [Caenorhabditis elegans]	40427.2	40	103	0.878	CPEALFQPSFLGMESAGIHETSYNSIMKCDIDIR	37.2	3917.79
3xFLAG::FBF-2 IP	Protein ACT-4, isoform a [Caenorhabditis elegans]	40427.2	40	103	0.878	DLTDYLMK	43.5	998.486
3xFLAG::FBF-2 IP	Protein ACT-4, isoform a [Caenorhabditis elegans]	40427.2	40	103	0.878	DLYANTVLSGGTTMYPGIADR	106	2215.07
3xFLAG::FBF-2 IP	Protein ACT-4, isoform a [Caenorhabditis elegans]	40427.2	40	103	0.878	DLYANTVLSGGTTMYPGIADRMQK	57.5	2602.26
3xFLAG::FBF-2 IP	Protein ACT-4, isoform a [Caenorhabditis elegans]	40427.2	40	103	0.878	DSYVGDEAQSK	58	1198.52
3xFLAG::FBF-2 IP	Protein ACT-4, isoform a [Caenorhabditis elegans]	40427.2	40	103	0.878	DSYVGDEAQSKR	64.4	1354.62
3xFLAG::FBF-2 IP	Protein ACT-4, isoform a [Caenorhabditis elegans]	40427.2	40	103	0.878	EITALAPSTMKIK	37.5	1418.79
3xFLAG::FBF-2 IP	Protein ACT-4, isoform a [Caenorhabditis elegans]	40427.2	40	103	0.878	EKLCYVALDFEQEMATAASSSSLEK	82.3	2807.31
3xFLAG::FBF-2 IP	Protein ACT-4, isoform a [Caenorhabditis elegans]	40427.2	40	103	0.878	EKMTQIMFETFNTPAMYVAIQAVLSLYASGR	40	3526.74
3xFLAG::FBF-2 IP	Protein ACT-4, isoform a [Caenorhabditis elegans]	40427.2	40	103	0.878	FRCPEALFQPSFLGMESAGIHETSYNSIMK	102	3447.62
3xFLAG::FBF-2 IP	Protein ACT-4, isoform a [Caenorhabditis elegans]	40427.2	40	103	0.878	GYSFTTTAER	55.7	1132.53
3xFLAG::FBF-2 IP	Protein ACT-4, isoform a [Caenorhabditis elegans]	40427.2	40	103	0.878	GYSFTTTAEREIVR	32.9	1629.82
3xFLAG::FBF-2 IP	Protein ACT-4, isoform a [Caenorhabditis elegans]	40427.2	40	103	0.878	HQGVMVGMGQK	61.8	1171.57
3xFLAG::FBF-2 IP	Protein ACT-4, isoform a [Caenorhabditis elegans]	40427.2	40	103	0.878	HQGVMVGMGQKDSYVGDEAQSK	64.4	2351.08
3xFLAG::FBF-2 IP	Protein ACT-4, isoform a [Caenorhabditis elegans]	40427.2	40	103	0.878	IIAPPER	32.7	795.472
3xFLAG::FBF-2 IP	Protein ACT-4, isoform a [Caenorhabditis elegans]	40427.2	40	103	0.878	IIAPPERK	34.6	923.567
3xFLAG::FBF-2 IP	Protein ACT-4, isoform a [Caenorhabditis elegans]	40427.2	40	103	0.878	IKIIAPPER	30.8	1036.65
3xFLAG::FBF-2 IP	Protein ACT-4, isoform a [Caenorhabditis elegans]	40427.2	40	103	0.878	ILTERGYSFTTTAER	31	1744.89
3xFLAG::FBF-2 IP	Protein ACT-4, isoform a [Caenorhabditis elegans]	40427.2	40	103	0.878	IWHHTFYNELR	35.5	1515.75
3xFLAG::FBF-2 IP	Protein ACT-4, isoform a [Caenorhabditis elegans]	40427.2	40	103	0.878	KDLYANTVLSGGTTMYPGIADR	91.2	2343.17
3xFLAG::FBF-2 IP	Protein ACT-4, isoform a [Caenorhabditis elegans]	40427.2	40	103	0.878	LCYVALDFEQEMATAASSSSLEK	133	2550.17
3xFLAG::FBF-2 IP	Protein ACT-4, isoform a [Caenorhabditis elegans]	40427.2	40	103	0.878	LCYVALDFEQEMATAASSSSLEKSYELPDGQVITVGNER	130	4308.03
3xFLAG::FBF-2 IP	Protein ACT-4, isoform a [Caenorhabditis elegans]	40427.2	40	103	0.878	LDLAGRDLTDYLMK	40	1623.84
3xFLAG::FBF-2 IP	Protein ACT-4, isoform a [Caenorhabditis elegans]	40427.2	40	103	0.878	MQKEITALAPSTMK	87.7	1564.81
3xFLAG::FBF-2 IP	Protein ACT-4, isoform a [Caenorhabditis elegans]	40427.2	40	103	0.878	MTQIMFETFNTPAMYVAIQAVLSLYASGR	59.6	3253.61
3xFLAG::FBF-2 IP	Protein ACT-4, isoform a [Caenorhabditis elegans]	40427.2	40	103	0.878	MTQIMFETFNTPAMYVAIQAVLSLYASGRTTGVVLDSGDGVTHTVPIYEGYALPHAILR	41.3	6387.22
3xFLAG::FBF-2 IP	Protein ACT-4, isoform a [Caenorhabditis elegans]	40427.2	40	103	0.878	QEYDESGPSIVHR	62.4	1516.7
3xFLAG::FBF-2 IP	Protein ACT-4, isoform a [Caenorhabditis elegans]	40427.2	40	103	0.878	QEYDESGPSIVHRK	71.2	1644.8
3xFLAG::FBF-2 IP	Protein ACT-4, isoform a [Caenorhabditis elegans]	40427.2	40	103	0.878	SYELPDGQVITVGNER	103	1776.88
3xFLAG::FBF-2 IP	Protein ACT-4, isoform a [Caenorhabditis elegans]	40427.2	40	103	0.878	SYELPDGQVITVGNERFR	54.6	2080.05
3xFLAG::FBF-2 IP	Protein ACT-4, isoform a [Caenorhabditis elegans]	40427.2	40	103	0.878	TTGVVLDSGDGVTHTVPIYEGYALPHAILR	96.6	3151.64
3xFLAG::FBF-2 IP	Protein ACT-4, isoform a [Caenorhabditis elegans]	40427.2	40	103	0.878	TTGVVLDSGDGVTHTVPIYEGYALPHAILRLDLAGR	36.2	3777
3xFLAG::FBF-2 IP	Protein ACT-4, isoform a [Caenorhabditis elegans]	40427.2	40	103	0.878	VAPEEHPVLLTEAPLNPK	64.2	1954.06
3xFLAG::FBF-2 IP	Protein ACT-4, isoform a [Caenorhabditis elegans]	40427.2	40	103	0.878	VAPEEHPVLLTEAPLNPKANR	72.4	2295.25
3xFLAG::FBF-2 IP	Protein ACT-4, isoform a [Caenorhabditis elegans]	40427.2	40	103	0.878	YSVWIGGSILASLSTFQQMWISKQEYDESGPSIVHR	109	4100.02
3xFLAG::FBF-2 IP	Protein ACT-4, isoform b [Caenorhabditis elegans]	37279.8	2	2	0.919	CDIDIRK	39.2	919.467
3xFLAG::FBF-2 IP	Protein ACT-4, isoform b [Caenorhabditis elegans]	37279.8	2	2	0.919	CPEALFQPSFLGMESAGIHETSYNSIMK	66.8	3145.43
3xFLAG::FBF-2 IP	Protein ACT-4, isoform b [Caenorhabditis elegans]	37279.8	2	2	0.919	CPEALFQPSFLGMESAGIHETSYNSIMKCDIDIR	37.2	3917.79
3xFLAG::FBF-2 IP	Protein ACT-4, isoform b [Caenorhabditis elegans]	37279.8	2	2	0.919	DLTDYLMK	43.5	998.486
3xFLAG::FBF-2 IP	Protein ACT-4, isoform b [Caenorhabditis elegans]	37279.8	2	2	0.919	DLYANTVLSGGTTMYPGIADR	106	2215.07
3xFLAG::FBF-2 IP	Protein ACT-4, isoform b [Caenorhabditis elegans]	37279.8	2	2	0.919	DLYANTVLSGGTTMYPGIADRMQK	57.5	2602.26
3xFLAG::FBF-2 IP	Protein ACT-4, isoform b [Caenorhabditis elegans]	37279.8	2	2	0.919	DSYVGDEAQSK	58	1198.52
3xFLAG::FBF-2 IP	Protein ACT-4, isoform b [Caenorhabditis elegans]	37279.8	2	2	0.919	DSYVGDEAQSKR	64.4	1354.62
3xFLAG::FBF-2 IP	Protein ACT-4, isoform b [Caenorhabditis elegans]	37279.8	2	2	0.919	EITALAPSTMKIK	37.5	1418.79
3xFLAG::FBF-2 IP	Protein ACT-4, isoform b [Caenorhabditis elegans]	37279.8	2	2	0.919	EKLCYVALDFEQEMATAASSSSLEK	82.3	2807.31
3xFLAG::FBF-2 IP	Protein ACT-4, isoform b [Caenorhabditis elegans]	37279.8	2	2	0.919	EKMTQIMFETFNTPAMYVAIQAVLSLYASGR	40	3526.74
3xFLAG::FBF-2 IP	Protein ACT-4, isoform b [Caenorhabditis elegans]	37279.8	2	2	0.919	FRCPEALFQPSFLGMESAGIHETSYNSIMK	102	3447.62
3xFLAG::FBF-2 IP	Protein ACT-4, isoform b [Caenorhabditis elegans]	37279.8	2	2	0.919	GYSFTTTAER	55.7	1132.53
3xFLAG::FBF-2 IP	Protein ACT-4, isoform b [Caenorhabditis elegans]	37279.8	2	2	0.919	GYSFTTTAEREIVR	32.9	1629.82
3xFLAG::FBF-2 IP	Protein ACT-4, isoform b [Caenorhabditis elegans]	37279.8	2	2	0.919	IIAPPER	32.7	795.472
3xFLAG::FBF-2 IP	Protein ACT-4, isoform b [Caenorhabditis elegans]	37279.8	2	2	0.919	IIAPPERK	34.6	923.567
3xFLAG::FBF-2 IP	Protein ACT-4, isoform b [Caenorhabditis elegans]	37279.8	2	2	0.919	IKIIAPPER	30.8	1036.65
3xFLAG::FBF-2 IP	Protein ACT-4, isoform b [Caenorhabditis elegans]	37279.8	2	2	0.919	ILTERGYSFTTTAER	31	1744.89
3xFLAG::FBF-2 IP	Protein ACT-4, isoform b [Caenorhabditis elegans]	37279.8	2	2	0.919	IWHHTFYNELR	35.5	1515.75
3xFLAG::FBF-2 IP	Protein ACT-4, isoform b [Caenorhabditis elegans]	37279.8	2	2	0.919	KDLYANTVLSGGTTMYPGIADR	91.2	2343.17
3xFLAG::FBF-2 IP	Protein ACT-4, isoform b [Caenorhabditis elegans]	37279.8	2	2	0.919	LCYVALDFEQEMATAASSSSLEK	133	2550.17
3xFLAG::FBF-2 IP	Protein ACT-4, isoform b [Caenorhabditis elegans]	37279.8	2	2	0.919	LCYVALDFEQEMATAASSSSLEKSYELPDGQVITVGNER	130	4308.03
3xFLAG::FBF-2 IP	Protein ACT-4, isoform b [Caenorhabditis elegans]	37279.8	2	2	0.919	LDLAGRDLTDYLMK	40	1623.84
3xFLAG::FBF-2 IP	Protein ACT-4, isoform b [Caenorhabditis elegans]	37279.8	2	2	0.919	MQKEITALAPSTMK	87.7	1564.81
3xFLAG::FBF-2 IP	Protein ACT-4, isoform b [Caenorhabditis elegans]	37279.8	2	2	0.919	MTQIMFETFNTPAMYVAIQAVLSLYASGR	59.6	3253.61
3xFLAG::FBF-2 IP	Protein ACT-4, isoform b [Caenorhabditis elegans]	37279.8	2	2	0.919	MTQIMFETFNTPAMYVAIQAVLSLYASGRTTGVVLDSGDGVTHTVPIYEGYALPHAILR	41.3	6387.22
3xFLAG::FBF-2 IP	Protein ACT-4, isoform b [Caenorhabditis elegans]	37279.8	2	2	0.919	MVGMGQK	25.2	750.364
3xFLAG::FBF-2 IP	Protein ACT-4, isoform b [Caenorhabditis elegans]	37279.8	2	2	0.919	QEYDESGPSIVHR	62.4	1516.7
3xFLAG::FBF-2 IP	Protein ACT-4, isoform b [Caenorhabditis elegans]	37279.8	2	2	0.919	QEYDESGPSIVHRK	71.2	1644.8
3xFLAG::FBF-2 IP	Protein ACT-4, isoform b [Caenorhabditis elegans]	37279.8	2	2	0.919	SYELPDGQVITVGNER	103	1776.88
3xFLAG::FBF-2 IP	Protein ACT-4, isoform b [Caenorhabditis elegans]	37279.8	2	2	0.919	SYELPDGQVITVGNERFR	54.6	2080.05
3xFLAG::FBF-2 IP	Protein ACT-4, isoform b [Caenorhabditis elegans]	37279.8	2	2	0.919	TTGVVLDSGDGVTHTVPIYEGYALPHAILR	96.6	3151.64
3xFLAG::FBF-2 IP	Protein ACT-4, isoform b [Caenorhabditis elegans]	37279.8	2	2	0.919	TTGVVLDSGDGVTHTVPIYEGYALPHAILRLDLAGR	36.2	3777
3xFLAG::FBF-2 IP	Protein ACT-4, isoform b [Caenorhabditis elegans]	37279.8	2	2	0.919	VAPEEHPVLLTEAPLNPK	64.2	1954.06
3xFLAG::FBF-2 IP	Protein ACT-4, isoform b [Caenorhabditis elegans]	37279.8	2	2	0.919	VAPEEHPVLLTEAPLNPKANR	72.4	2295.25
3xFLAG::FBF-2 IP	Protein ACT-4, isoform b [Caenorhabditis elegans]	37279.8	2	2	0.919	VGMGQKDSYVGDEAQSK	37.8	1798.83
3xFLAG::FBF-2 IP	Protein ACT-4, isoform b [Caenorhabditis elegans]	37279.8	2	2	0.919	YSVWIGGSILASLSTFQQMWISKQEYDESGPSIVHR	109	4100.02
3xFLAG::FBF-2 IP	Protein RPL-10 [Caenorhabditis elegans]	24749.4	4	5	0.215	ICANKYMVK	23.7	1126.57
3xFLAG::FBF-2 IP	Protein RPL-10 [Caenorhabditis elegans]	24749.4	4	5	0.215	LRSDGVGVQLQR	47.1	1327.74
3xFLAG::FBF-2 IP	Protein RPL-10 [Caenorhabditis elegans]	24749.4	4	5	0.215	MLSCAGADRLQTGMR	41.7	1666.78
3xFLAG::FBF-2 IP	Protein RPL-10 [Caenorhabditis elegans]	24749.4	4	5	0.215	NCGKDGFHLR	41	1203.57
3xFLAG::FBF-2 IP	Protein AJM-1, isoform a [Caenorhabditis elegans]	137476	1	1	0.00676	EVMTRTIITR	3.94	1235.68
3xFLAG::FBF-2 IP	Protein MSP-57 [Caenorhabditis elegans]	14209.2	2	2	0.205	EWFQGDGMVR	41.5	1224.55
3xFLAG::FBF-2 IP	Protein MSP-57 [Caenorhabditis elegans]	14209.2	2	2	0.205	IVFNAPYDDKHTYHIK	2.78	1960.99
3xFLAG::FBF-2 IP	Protein VIT-5 [Caenorhabditis elegans]	186441	6	6	0.0455	LVLDIVPTVATTHVTEMR	29.7	1995.09
3xFLAG::FBF-2 IP	Protein VIT-5 [Caenorhabditis elegans]	186441	6	6	0.0455	STNPCYQQLAVR	51	1436.7
3xFLAG::FBF-2 IP	Protein VIT-5 [Caenorhabditis elegans]	186441	6	6	0.0455	TEAVDALR	35.9	874.463
3xFLAG::FBF-2 IP	Protein VIT-5 [Caenorhabditis elegans]	186441	6	6	0.0455	VLLPVYK	26.5	831.534
3xFLAG::FBF-2 IP	Protein VIT-5 [Caenorhabditis elegans]	186441	6	6	0.0455	VQQTDSQNAHAVFYLR	25.9	1876.93
3xFLAG::FBF-2 IP	Protein VIT-5 [Caenorhabditis elegans]	186441	6	6	0.0455	VVLQLSVEPLSR	59.1	1339.79
3xFLAG::FBF-2 IP	Protein IFF-1, isoform b [Caenorhabditis elegans]	17867.3	2	2	0.161	IVEMSTSK	33.2	894.46
3xFLAG::FBF-2 IP	Protein IFF-1, isoform b [Caenorhabditis elegans]	17867.3	2	2	0.161	KLEDICPSTHNMDVPVVK	50	2082.04
3xFLAG::FBF-2 IP	Protein UNC-44, isoform f [Caenorhabditis elegans]	775384	1	1	0.00143	TTTTTVTEER	3.25	1138.56
3xFLAG::FBF-2 IP	Protein H28O16.1, isoform a [Caenorhabditis elegans]	55021.3	4	4	0.108	AVDSLVPIGR	65.8	1026.59
3xFLAG::FBF-2 IP	Protein H28O16.1, isoform a [Caenorhabditis elegans]	55021.3	4	4	0.108	ELIIGDRQTGK	24.7	1229.69
3xFLAG::FBF-2 IP	Protein H28O16.1, isoform a [Caenorhabditis elegans]	55021.3	4	4	0.108	ILGTETGINLEETGKVLSIGDGIAR	39.5	2556.39
3xFLAG::FBF-2 IP	Protein H28O16.1, isoform a [Caenorhabditis elegans]	55021.3	4	4	0.108	LSVREPMVTGVK	50	1315.74
3xFLAG::FBF-2 IP	Protein MIF-4 [Caenorhabditis elegans]	13808.3	2	2	0.256	IENDSYAK	33.3	939.442
3xFLAG::FBF-2 IP	Protein MIF-4 [Caenorhabditis elegans]	13808.3	2	2	0.256	IGFENKEIPVAIVNFQTTRPSSR	28.4	2603.39
3xFLAG::FBF-2 IP	Protein SQD-1, isoform a [Caenorhabditis elegans]	33467	2	2	0.0951	FQQQPQQQTAQAQQF	75.3	1805.86
3xFLAG::FBF-2 IP	Protein SQD-1, isoform a [Caenorhabditis elegans]	33467	2	2	0.0951	NNSGFDYQQAQGAR	69.4	1555.69
3xFLAG::FBF-2 IP	Protein BEN-1 [Caenorhabditis elegans]	49446.5	3	3	0.0878	AVLVDLEPGTMDSVR	80.8	1601.82
3xFLAG::FBF-2 IP	Protein BEN-1 [Caenorhabditis elegans]	49446.5	3	3	0.0878	LAVNMVPFPR	51.6	1143.63
3xFLAG::FBF-2 IP	Protein BEN-1 [Caenorhabditis elegans]	49446.5	3	3	0.0878	LHFFMPGFAPLSAK	26.5	1562.82
3xFLAG::FBF-2 IP	Protein HSP-1 [Caenorhabditis elegans]	69725.1	10	10	0.206	IINEPTAAAIAYGLDKK	29.3	1787.99
3xFLAG::FBF-2 IP	Protein HSP-1 [Caenorhabditis elegans]	69725.1	10	10	0.206	ITITNDKGR	35.1	1017.57
3xFLAG::FBF-2 IP	Protein HSP-1 [Caenorhabditis elegans]	69725.1	10	10	0.206	LLSDLFSGKELNK	27.5	1463.81
3xFLAG::FBF-2 IP	Protein HSP-1 [Caenorhabditis elegans]	69725.1	10	10	0.206	LSKDDIER	27.6	975.511
3xFLAG::FBF-2 IP	Protein HSP-1 [Caenorhabditis elegans]	69725.1	10	10	0.206	MDKSQVHDIVLVGGSTR	66.3	1841.95
3xFLAG::FBF-2 IP	Protein HSP-1 [Caenorhabditis elegans]	69725.1	10	10	0.206	NTTIPTKTAQTFTTYSDNQPGVLIQVYEGER	78.8	3472.72
3xFLAG::FBF-2 IP	Protein HSP-1 [Caenorhabditis elegans]	69725.1	10	10	0.206	QATKDAGAIAGLNVLR	48.4	1597.9
3xFLAG::FBF-2 IP	Protein HSP-1 [Caenorhabditis elegans]	69725.1	10	10	0.206	STMDPVEK	28.5	906.424
3xFLAG::FBF-2 IP	Protein HSP-1 [Caenorhabditis elegans]	69725.1	10	10	0.206	TAQTFTTYSDNQPGVLIQVYEGER	33.4	2717.31
3xFLAG::FBF-2 IP	Protein HSP-1 [Caenorhabditis elegans]	69725.1	10	10	0.206	TTPSYVAFTDTER	59.6	1487.7
3xFLAG::FBF-2 IP	Protein ANT-1.1, isoform a [Caenorhabditis elegans]	33046.6	5	5	0.147	EQGVAALWR	49.8	1029.55
3xFLAG::FBF-2 IP	Protein ANT-1.1, isoform a [Caenorhabditis elegans]	33046.6	5	5	0.147	GALSNVFR	47.3	863.473
3xFLAG::FBF-2 IP	Protein ANT-1.1, isoform a [Caenorhabditis elegans]	33046.6	5	5	0.147	GNLANVIR	38.6	856.5
3xFLAG::FBF-2 IP	Protein ANT-1.1, isoform a [Caenorhabditis elegans]	33046.6	5	5	0.147	IIQNEGMSAMFK	66.1	1368.67
3xFLAG::FBF-2 IP	Protein ANT-1.1, isoform a [Caenorhabditis elegans]	33046.6	5	5	0.147	LAADIGK	28.1	687.404
3xFLAG::FBF-2 IP	Protein UNC-89, isoform a [Caenorhabditis elegans]	824242	1	1	0.00166	CVAENTYGSAR	58	1227.54
3xFLAG::FBF-2 IP	Protein VIT-1 [Caenorhabditis elegans]	188065	4	4	0.026	GYEAVEQQQR	59.2	1207.57
3xFLAG::FBF-2 IP	Protein VIT-1 [Caenorhabditis elegans]	188065	4	4	0.026	LLKDTMPR	32.3	973.55
3xFLAG::FBF-2 IP	Protein VIT-1 [Caenorhabditis elegans]	188065	4	4	0.026	SQLLVVRPEMPSSLR	27	1711.95
3xFLAG::FBF-2 IP	Protein VIT-1 [Caenorhabditis elegans]	188065	4	4	0.026	VYLPSIAQR	31.6	1046.6
3xFLAG::FBF-2 IP	Protein F47B7.7, isoform a [Caenorhabditis elegans]	37713	2	2	0.137	FVLQPPVFVEDEVPPSPREVVPHR	0.55	2770.46
3xFLAG::FBF-2 IP	Protein F47B7.7, isoform a [Caenorhabditis elegans]	37713	2	2	0.137	SMGSDYATSSGSEQSSPIPARR	68.4	2272.01
3xFLAG::FBF-2 IP	Protein NMY-1 [Caenorhabditis elegans]	229375	30	36	0.198	AKITELESGAQSR	83.3	1389.73
3xFLAG::FBF-2 IP	Protein NMY-1 [Caenorhabditis elegans]	229375	30	36	0.198	ANDKSFVEK	31.1	1037.53
3xFLAG::FBF-2 IP	Protein NMY-1 [Caenorhabditis elegans]	229375	30	36	0.198	AQMAALEAK	48.9	932.487
3xFLAG::FBF-2 IP	Protein NMY-1 [Caenorhabditis elegans]	229375	30	36	0.198	AQVQLEQITTDLSMER	94	1861.93
3xFLAG::FBF-2 IP	Protein NMY-1 [Caenorhabditis elegans]	229375	30	36	0.198	ARAQMAALEAK	33.4	1159.63
3xFLAG::FBF-2 IP	Protein NMY-1 [Caenorhabditis elegans]	229375	30	36	0.198	CIIPNHEKK	25.4	1138.6
3xFLAG::FBF-2 IP	Protein NMY-1 [Caenorhabditis elegans]	229375	30	36	0.198	EVVAQLEK	33.3	915.515
3xFLAG::FBF-2 IP	Protein NMY-1 [Caenorhabditis elegans]	229375	30	36	0.198	FIVPDMR	38.8	877.46
3xFLAG::FBF-2 IP	Protein NMY-1 [Caenorhabditis elegans]	229375	30	36	0.198	GFDVPGSSDNLAREEENESNVSGSEHGMSVN	58.2	3250.38
3xFLAG::FBF-2 IP	Protein NMY-1 [Caenorhabditis elegans]	229375	30	36	0.198	HRYEILTPDVIPK	51.9	1580.88
3xFLAG::FBF-2 IP	Protein NMY-1 [Caenorhabditis elegans]	229375	30	36	0.198	IAQLEEELEEEQSNCELAIDKQR	99.2	2775.3
3xFLAG::FBF-2 IP	Protein NMY-1 [Caenorhabditis elegans]	229375	30	36	0.198	IMGFADDEISSIMR	86.8	1584.74
3xFLAG::FBF-2 IP	Protein NMY-1 [Caenorhabditis elegans]	229375	30	36	0.198	INSNLVLEQLR	71.3	1298.74
3xFLAG::FBF-2 IP	Protein NMY-1 [Caenorhabditis elegans]	229375	30	36	0.198	ITELESGAQSR	72.7	1190.6
3xFLAG::FBF-2 IP	Protein NMY-1 [Caenorhabditis elegans]	229375	30	36	0.198	KAQVQLEQITTDLSMER	55.9	1990.03
3xFLAG::FBF-2 IP	Protein NMY-1 [Caenorhabditis elegans]	229375	30	36	0.198	KFESQMAEER	57.4	1254.58
3xFLAG::FBF-2 IP	Protein NMY-1 [Caenorhabditis elegans]	229375	30	36	0.198	LATAEGQIQELNEQIQEETRLK	45.9	2543.28
3xFLAG::FBF-2 IP	Protein NMY-1 [Caenorhabditis elegans]	229375	30	36	0.198	NQQIIKEYQIECEEAR	46.8	2050.99
3xFLAG::FBF-2 IP	Protein NMY-1 [Caenorhabditis elegans]	229375	30	36	0.198	NTSPHFVR	49.7	957.49
3xFLAG::FBF-2 IP	Protein NMY-1 [Caenorhabditis elegans]	229375	30	36	0.198	NVQREADDLLDANEQLTR	79.4	2100.03
3xFLAG::FBF-2 IP	Protein NMY-1 [Caenorhabditis elegans]	229375	30	36	0.198	QLDEAEDEMSRER	37.6	1607.7
3xFLAG::FBF-2 IP	Protein NMY-1 [Caenorhabditis elegans]	229375	30	36	0.198	QLEESEVAKER	59.5	1317.66
3xFLAG::FBF-2 IP	Protein NMY-1 [Caenorhabditis elegans]	229375	30	36	0.198	QMETVRDLEEQLEQEEQAR	34.7	2361.1
3xFLAG::FBF-2 IP	Protein NMY-1 [Caenorhabditis elegans]	229375	30	36	0.198	QVEELHDQIEQHKK	5.05	1760.89
3xFLAG::FBF-2 IP	Protein NMY-1 [Caenorhabditis elegans]	229375	30	36	0.198	QVTISRDDVQK	31.3	1288.69
3xFLAG::FBF-2 IP	Protein NMY-1 [Caenorhabditis elegans]	229375	30	36	0.198	SLEAELNDMRVQMEELEDNLQIAEDAR	83.9	3162.46
3xFLAG::FBF-2 IP	Protein NMY-1 [Caenorhabditis elegans]	229375	30	36	0.198	TLIDQLER	55.5	987.547
3xFLAG::FBF-2 IP	Protein NMY-1 [Caenorhabditis elegans]	229375	30	36	0.198	TVSQLHKEQLTK	53.8	1411.79
3xFLAG::FBF-2 IP	Protein NMY-1 [Caenorhabditis elegans]	229375	30	36	0.198	VIQYLAHVAGATR	45.5	1398.79
3xFLAG::FBF-2 IP	Protein NMY-1 [Caenorhabditis elegans]	229375	30	36	0.198	VQYLEDQLNVEGQEKTAANR	55.2	2305.14
3xFLAG::FBF-2 IP	Protein AHCY-1 [Caenorhabditis elegans]	47536.3	6	8	0.208	ATDVMLAGK	53.3	905.476
3xFLAG::FBF-2 IP	Protein AHCY-1 [Caenorhabditis elegans]	47536.3	6	8	0.208	GLSEETTTGVHNLAK	60.2	1556.79
3xFLAG::FBF-2 IP	Protein AHCY-1 [Caenorhabditis elegans]	47536.3	6	8	0.208	TLDEEVAYLHLAQLGVK	42	1899.02
3xFLAG::FBF-2 IP	Protein AHCY-1 [Caenorhabditis elegans]	47536.3	6	8	0.208	VIVTEIDPINALQAAMEGYEVTTLEEAAPK	57.9	3216.62
3xFLAG::FBF-2 IP	Protein AHCY-1 [Caenorhabditis elegans]	47536.3	6	8	0.208	YGPSQPLKGAR	27.7	1173.64
3xFLAG::FBF-2 IP	Protein AHCY-1 [Caenorhabditis elegans]	47536.3	6	8	0.208	YPQYLAGIR	52.2	1080.58
3xFLAG::FBF-2 IP	Protein TKT-1 [Caenorhabditis elegans]	66012	1	1	0.021	KIDSDIEGHPTPR	37.8	1464.74
3xFLAG::FBF-2 IP	Protein ABTS-3, isoform a [Caenorhabditis elegans]	107986	15	16	0.227	ALADVEER	42.5	902.458
3xFLAG::FBF-2 IP	Protein ABTS-3, isoform a [Caenorhabditis elegans]	107986	15	16	0.227	ATMDIDHLLNK	25.1	1270.65
3xFLAG::FBF-2 IP	Protein ABTS-3, isoform a [Caenorhabditis elegans]	107986	15	16	0.227	ATMDIDHLLNKAVLLLDLQETSLEEIFAK	70.2	3283.75
3xFLAG::FBF-2 IP	Protein ABTS-3, isoform a [Caenorhabditis elegans]	107986	15	16	0.227	LSHPTNLGR	34.9	994.543
3xFLAG::FBF-2 IP	Protein ABTS-3, isoform a [Caenorhabditis elegans]	107986	15	16	0.227	LVMAQSVEQFR	60.9	1307.68
3xFLAG::FBF-2 IP	Protein ABTS-3, isoform a [Caenorhabditis elegans]	107986	15	16	0.227	NYNDCDTSAISMK	66.9	1518.62
3xFLAG::FBF-2 IP	Protein ABTS-3, isoform a [Caenorhabditis elegans]	107986	15	16	0.227	RHDSDASGSANSEATVASGANTPR	76.9	2358.07
3xFLAG::FBF-2 IP	Protein ABTS-3, isoform a [Caenorhabditis elegans]	107986	15	16	0.227	STLLSAAK	39.9	790.467
3xFLAG::FBF-2 IP	Protein ABTS-3, isoform a [Caenorhabditis elegans]	107986	15	16	0.227	STLLSAAKELAMDQNQWR	40	2062.04
3xFLAG::FBF-2 IP	Protein ABTS-3, isoform a [Caenorhabditis elegans]	107986	15	16	0.227	STSEMHQSCTSATIHSLESHHNEER	47.4	2896.22
3xFLAG::FBF-2 IP	Protein ABTS-3, isoform a [Caenorhabditis elegans]	107986	15	16	0.227	SVLFTQDAGNQFHILSR	36.8	1932.99
3xFLAG::FBF-2 IP	Protein ABTS-3, isoform a [Caenorhabditis elegans]	107986	15	16	0.227	TALETTR	29.3	791.426
3xFLAG::FBF-2 IP	Protein ABTS-3, isoform a [Caenorhabditis elegans]	107986	15	16	0.227	TPGGIVLTNGASNSNSTNNGGVHR	62.8	2325.12
3xFLAG::FBF-2 IP	Protein ABTS-3, isoform a [Caenorhabditis elegans]	107986	15	16	0.227	YASETSFATETASESSLEREVPSR	31.7	2634.22
3xFLAG::FBF-2 IP	Protein ABTS-3, isoform a [Caenorhabditis elegans]	107986	15	16	0.227	YLDALDGRH	35.1	1059.52
3xFLAG::FBF-2 IP	Protein RPL-17, isoform a [Caenorhabditis elegans]	21512.9	1	1	0.0481	GSDLRVHFK	27.3	1058.57
3xFLAG::FBF-2 IP	Protein RPL-28 [Caenorhabditis elegans]	13725.1	2	2	0.159	GVVVSTKNEK	23.7	1060.6
3xFLAG::FBF-2 IP	Protein RPL-28 [Caenorhabditis elegans]	13725.1	2	2	0.159	HAIDVSAAAK	50.4	982.532
3xFLAG::FBF-2 IP	Protein CAH-4, isoform a [Caenorhabditis elegans]	26170.3	12	20	0.407	ATGNATPIAMPK	59.2	1187.61
3xFLAG::FBF-2 IP	Protein CAH-4, isoform a [Caenorhabditis elegans]	26170.3	12	20	0.407	DFHIEHLLPSPDKR	27.6	1703.89
3xFLAG::FBF-2 IP	Protein CAH-4, isoform a [Caenorhabditis elegans]	26170.3	12	20	0.407	EGKYNDNYHGLIDTVR	20.5	1893.91
3xFLAG::FBF-2 IP	Protein CAH-4, isoform a [Caenorhabditis elegans]	26170.3	12	20	0.407	KATGNATPIAMPK	60.4	1299.71
3xFLAG::FBF-2 IP	Protein CAH-4, isoform a [Caenorhabditis elegans]	26170.3	12	20	0.407	NCGTFLTANHLPSSK	78.9	1646.8
3xFLAG::FBF-2 IP	Protein CAH-4, isoform a [Caenorhabditis elegans]	26170.3	12	20	0.407	NIIPANHR	31.9	935.506
3xFLAG::FBF-2 IP	Protein CAH-4, isoform a [Caenorhabditis elegans]	26170.3	12	20	0.407	QSPIDIVPQHVCCDTDVCK	30.8	2271.02
3xFLAG::FBF-2 IP	Protein CAH-4, isoform a [Caenorhabditis elegans]	26170.3	12	20	0.407	QSPIDIVPQHVCCDTDVCKADALNIDYK	65.9	3275.5
3xFLAG::FBF-2 IP	Protein CAH-4, isoform a [Caenorhabditis elegans]	26170.3	12	20	0.407	RNCGTFLTANHLPSSK	58.8	1802.9
3xFLAG::FBF-2 IP	Protein CAH-4, isoform a [Caenorhabditis elegans]	26170.3	12	20	0.407	SGDCCDVLVSEGGFLVNVKR	83	2211.05
3xFLAG::FBF-2 IP	Protein CAH-4, isoform a [Caenorhabditis elegans]	26170.3	12	20	0.407	YNDNYHGLIDTVR	69.5	1579.75
3xFLAG::FBF-2 IP	Protein CAH-4, isoform a [Caenorhabditis elegans]	26170.3	12	20	0.407	YNDNYHGLIDTVRK	44.4	1707.85
3xFLAG::FBF-2 IP	Protein HPO-34, isoform a [Caenorhabditis elegans]	85641.1	6	6	0.126	ATSVSVHSSVSQK	66	1316.68
3xFLAG::FBF-2 IP	Protein HPO-34, isoform a [Caenorhabditis elegans]	85641.1	6	6	0.126	KNTLVSVGK	40.2	945.573
3xFLAG::FBF-2 IP	Protein HPO-34, isoform a [Caenorhabditis elegans]	85641.1	6	6	0.126	LFENYGPAHLPEYASNPSAYIH	56.8	2491.16
3xFLAG::FBF-2 IP	Protein HPO-34, isoform a [Caenorhabditis elegans]	85641.1	6	6	0.126	STTVVLEDVRSGSEGVSSLR	64.1	2078.07
3xFLAG::FBF-2 IP	Protein HPO-34, isoform a [Caenorhabditis elegans]	85641.1	6	6	0.126	VNPTVQQHVIYNPYGDHQSVR	61.8	2451.22
3xFLAG::FBF-2 IP	Protein HPO-34, isoform a [Caenorhabditis elegans]	85641.1	6	6	0.126	VSEHVQLGGSRK	22	1296.7
3xFLAG::FBF-2 IP	Protein TAG-18 [Caenorhabditis elegans]	24429.4	2	2	0.0995	FGNVGTLTR	50.9	964.521
3xFLAG::FBF-2 IP	Protein TAG-18 [Caenorhabditis elegans]	24429.4	2	2	0.0995	VGPNYSSTLHK	29.1	1202.62
N2 Neg Ctrl IP	Protein UNC-15, isoform b [Caenorhabditis elegans]	63703.5	4	7	0.085	KSLEEQVK	29.4	960.536
N2 Neg Ctrl IP	Protein UNC-15, isoform b [Caenorhabditis elegans]	63703.5	4	7	0.085	QLAESESVTMQNLQR	101	1749.84
N2 Neg Ctrl IP	Protein UNC-15, isoform b [Caenorhabditis elegans]	63703.5	4	7	0.085	RQLAESESVTMQNLQR	73	1889.95
N2 Neg Ctrl IP	Protein UNC-15, isoform b [Caenorhabditis elegans]	63703.5	4	7	0.085	YQHELEDAEGRADQAESSLHLIR	32.9	2667.28
N2 Neg Ctrl IP	Protein CPF-1 [Caenorhabditis elegans]	47962.1	23	28	0.809	AAAFNSDGSLVATGSADCSIK	134	2041.95
N2 Neg Ctrl IP	Protein CPF-1 [Caenorhabditis elegans]	47962.1	23	28	0.809	ALSCHPGGEFLLVATDHPTVR	42.7	2277.14
N2 Neg Ctrl IP	Protein CPF-1 [Caenorhabditis elegans]	47962.1	23	28	0.809	CLIVYTGAGATGAQDFATNASFNHNEDYVLFPDEK	92.3	3836.74
N2 Neg Ctrl IP	Protein CPF-1 [Caenorhabditis elegans]	47962.1	23	28	0.809	CVETFKR	27.2	939.472
N2 Neg Ctrl IP	Protein CPF-1 [Caenorhabditis elegans]	47962.1	23	28	0.809	DSILISGSNDK	57.9	1148.58
N2 Neg Ctrl IP	Protein CPF-1 [Caenorhabditis elegans]	47962.1	23	28	0.809	DSILISGSNDKTVK	63.6	1476.79
N2 Neg Ctrl IP	Protein CPF-1 [Caenorhabditis elegans]	47962.1	23	28	0.809	EMNENGPDAHHPVIR	46.6	1715.79
N2 Neg Ctrl IP	Protein CPF-1 [Caenorhabditis elegans]	47962.1	23	28	0.809	IWDGVSNR	31.1	946.474
N2 Neg Ctrl IP	Protein CPF-1 [Caenorhabditis elegans]	47962.1	23	28	0.809	LIIGQLFYDGHQQIAVNLANTLGCSAPAPPPSDKLFR	60.8	4024.06
N2 Neg Ctrl IP	Protein CPF-1 [Caenorhabditis elegans]	47962.1	23	28	0.809	LLALGHTSACR	55.5	1198.64
N2 Neg Ctrl IP	Protein CPF-1 [Caenorhabditis elegans]	47962.1	23	28	0.809	LWELSTNR	34.1	1018.53
N2 Neg Ctrl IP	Protein CPF-1 [Caenorhabditis elegans]	47962.1	23	28	0.809	LYNIETAQAYASANPDDQHTESVTDVHYSENAR	50.6	3710.65
N2 Neg Ctrl IP	Protein CPF-1 [Caenorhabditis elegans]	47962.1	23	28	0.809	LYVTASK	29.1	781.445
N2 Neg Ctrl IP	Protein CPF-1 [Caenorhabditis elegans]	47962.1	23	28	0.809	LYVTASKDGHVK	34.3	1317.72
N2 Neg Ctrl IP	Protein CPF-1 [Caenorhabditis elegans]	47962.1	23	28	0.809	QFVEDPDYKAEEK	40.4	1597.74
N2 Neg Ctrl IP	Protein CPF-1 [Caenorhabditis elegans]	47962.1	23	28	0.809	SGSMCSWDAR	54.2	1156.45
N2 Neg Ctrl IP	Protein CPF-1 [Caenorhabditis elegans]	47962.1	23	28	0.809	SSPMQFEPVSSGLDLEYDADVQPVSSEPSEYETIYLTVHKAPCR	48.5	4959.29
N2 Neg Ctrl IP	Protein CPF-1 [Caenorhabditis elegans]	47962.1	23	28	0.809	TFVHSPSMPAFMTGSDDHR	30.2	2119.93
N2 Neg Ctrl IP	Protein CPF-1 [Caenorhabditis elegans]	47962.1	23	28	0.809	TFVHSPSMPAFMTGSDDHRAR	41.4	2347.07
N2 Neg Ctrl IP	Protein CPF-1 [Caenorhabditis elegans]	47962.1	23	28	0.809	TLSEVYPVR	40	1063.58
N2 Neg Ctrl IP	Protein CPF-1 [Caenorhabditis elegans]	47962.1	23	28	0.809	TLYDHVDDVNTVIFHPR	58.5	2041.01
N2 Neg Ctrl IP	Protein CPF-1 [Caenorhabditis elegans]	47962.1	23	28	0.809	YILTSGMDSIVK	47.7	1326.7
N2 Neg Ctrl IP	Protein CPF-1 [Caenorhabditis elegans]	47962.1	23	28	0.809	YILTSGMDSIVKLWELSTNR	45.4	2326.21
N2 Neg Ctrl IP	Protein ATP-2 [Caenorhabditis elegans]	57527.3	3	3	0.0874	GIAELAIYPAVDPLDSTSR	31	1988.03
N2 Neg Ctrl IP	Protein ATP-2 [Caenorhabditis elegans]	57527.3	3	3	0.0874	IMNVIGEPIDERGPIASK	21.1	1939.03
N2 Neg Ctrl IP	Protein ATP-2 [Caenorhabditis elegans]	57527.3	3	3	0.0874	VVDLLAPYAK	40.2	1088.64
N2 Neg Ctrl IP	Protein R12C12.1, isoform a [Caenorhabditis elegans]	108868	7	8	0.111	ALELPAPLDEYK	22.8	1358.72
N2 Neg Ctrl IP	Protein R12C12.1, isoform a [Caenorhabditis elegans]	108868	7	8	0.111	FGVPLGYGGPHAGFMAVAK	25.1	1875.96
N2 Neg Ctrl IP	Protein R12C12.1, isoform a [Caenorhabditis elegans]	108868	7	8	0.111	NICLIPTSAHGTNPASAQMANMK	48.7	2427.16
N2 Neg Ctrl IP	Protein R12C12.1, isoform a [Caenorhabditis elegans]	108868	7	8	0.111	NYLIHKGEEQR	54.7	1386.71
N2 Neg Ctrl IP	Protein R12C12.1, isoform a [Caenorhabditis elegans]	108868	7	8	0.111	RLENDYR	25.6	965.48
N2 Neg Ctrl IP	Protein R12C12.1, isoform a [Caenorhabditis elegans]	108868	7	8	0.111	SPGDLGADIAVGSAQR	111	1513.76
N2 Neg Ctrl IP	Protein R12C12.1, isoform a [Caenorhabditis elegans]	108868	7	8	0.111	SSLFLQHPVFNTHQSEQQLVR	62.7	2496.26
N2 Neg Ctrl IP	Protein EEF-2, isoform a [Caenorhabditis elegans]	94797.6	5	5	0.104	FIEPIEDIPSGNIAGLVGVDQYLVK	63.7	2686.43
N2 Neg Ctrl IP	Protein EEF-2, isoform a [Caenorhabditis elegans]	94797.6	5	5	0.104	GGTITTYKDAHNMR	45.9	1564.75
N2 Neg Ctrl IP	Protein EEF-2, isoform a [Caenorhabditis elegans]	94797.6	5	5	0.104	LANDEKDLEGKPLMK	22.9	1700.89
N2 Neg Ctrl IP	Protein EEF-2, isoform a [Caenorhabditis elegans]	94797.6	5	5	0.104	LLEPVYLVEIQCPEAAVGGIYGVLNR	84.9	2873.51
N2 Neg Ctrl IP	Protein EEF-2, isoform a [Caenorhabditis elegans]	94797.6	5	5	0.104	VNFTVDEIR	53.3	1092.57
N2 Neg Ctrl IP	Protein LEC-6 [Caenorhabditis elegans]	15982.6	5	6	0.514	FDEGAVVNNSTSGGGWQSEDR	94.4	2211.95
N2 Neg Ctrl IP	Protein LEC-6 [Caenorhabditis elegans]	15982.6	5	6	0.514	HANPFQQNK	34.6	1083.53
N2 Neg Ctrl IP	Protein LEC-6 [Caenorhabditis elegans]	15982.6	5	6	0.514	LVLLPTSADSR	42.7	1171.67
N2 Neg Ctrl IP	Protein LEC-6 [Caenorhabditis elegans]	15982.6	5	6	0.514	NEFFNPQTPVNIPVQGFSNGAR	91.2	2433.19
N2 Neg Ctrl IP	Protein LEC-6 [Caenorhabditis elegans]	15982.6	5	6	0.514	TPDDIVLHFNAR	52.2	1397.72
N2 Neg Ctrl IP	Protein ACT-3 [Caenorhabditis elegans]	41796.6	3	14	0.87	AGFAGDDAPR	68.5	976.448
N2 Neg Ctrl IP	Protein ACT-3 [Caenorhabditis elegans]	41796.6	3	14	0.87	AGFAGDDAPRAVFPSIVGRPR	26.8	2156.14
N2 Neg Ctrl IP	Protein ACT-3 [Caenorhabditis elegans]	41796.6	3	14	0.87	AVFPSIVGRPR	74.4	1198.71
N2 Neg Ctrl IP	Protein ACT-3 [Caenorhabditis elegans]	41796.6	3	14	0.87	CDIDIRK	41	919.467
N2 Neg Ctrl IP	Protein ACT-3 [Caenorhabditis elegans]	41796.6	3	14	0.87	CPEAMFQPSFLGMESAGIHETSYNSIMK	80.5	3162.4
N2 Neg Ctrl IP	Protein ACT-3 [Caenorhabditis elegans]	41796.6	3	14	0.87	CPEAMFQPSFLGMESAGIHETSYNSIMKCDIDIR	38.9	3934.76
N2 Neg Ctrl IP	Protein ACT-3 [Caenorhabditis elegans]	41796.6	3	14	0.87	DLTDYLMK	51.9	998.486
N2 Neg Ctrl IP	Protein ACT-3 [Caenorhabditis elegans]	41796.6	3	14	0.87	DLYANTVLSGGTTMYPGIADR	96	2215.07
N2 Neg Ctrl IP	Protein ACT-3 [Caenorhabditis elegans]	41796.6	3	14	0.87	DSYVGDEAQSK	63.9	1198.52
N2 Neg Ctrl IP	Protein ACT-3 [Caenorhabditis elegans]	41796.6	3	14	0.87	DSYVGDEAQSKR	61.3	1354.62
N2 Neg Ctrl IP	Protein ACT-3 [Caenorhabditis elegans]	41796.6	3	14	0.87	EITALAPSTMK	33	1177.61
N2 Neg Ctrl IP	Protein ACT-3 [Caenorhabditis elegans]	41796.6	3	14	0.87	EITALAPSTMKIK	22.9	1418.79
N2 Neg Ctrl IP	Protein ACT-3 [Caenorhabditis elegans]	41796.6	3	14	0.87	EKLCYVALDFEQEMATAASSSSLEK	64.9	2807.31
N2 Neg Ctrl IP	Protein ACT-3 [Caenorhabditis elegans]	41796.6	3	14	0.87	EKMTQIMFETFNTPAMYVAIQAVLSLYASGR	77.2	3510.75
N2 Neg Ctrl IP	Protein ACT-3 [Caenorhabditis elegans]	41796.6	3	14	0.87	FRCPEAMFQPSFLGMESAGIHETSYNSIMK	102	3465.57
N2 Neg Ctrl IP	Protein ACT-3 [Caenorhabditis elegans]	41796.6	3	14	0.87	GYSFTTTAER	65.2	1132.53
N2 Neg Ctrl IP	Protein ACT-3 [Caenorhabditis elegans]	41796.6	3	14	0.87	GYSFTTTAEREIVR	47.5	1629.82
N2 Neg Ctrl IP	Protein ACT-3 [Caenorhabditis elegans]	41796.6	3	14	0.87	HQGVMVGMGQK	67	1187.57
N2 Neg Ctrl IP	Protein ACT-3 [Caenorhabditis elegans]	41796.6	3	14	0.87	HQGVMVGMGQKDSYVGDEAQSK	59.6	2351.08
N2 Neg Ctrl IP	Protein ACT-3 [Caenorhabditis elegans]	41796.6	3	14	0.87	IIAPPERK	33.6	923.567
N2 Neg Ctrl IP	Protein ACT-3 [Caenorhabditis elegans]	41796.6	3	14	0.87	IKIIAPPER	37.6	1036.65
N2 Neg Ctrl IP	Protein ACT-3 [Caenorhabditis elegans]	41796.6	3	14	0.87	ILTERGYSFTTTAER	41.9	1744.89
N2 Neg Ctrl IP	Protein ACT-3 [Caenorhabditis elegans]	41796.6	3	14	0.87	IWHHTFYNELR	57.4	1516.73
N2 Neg Ctrl IP	Protein ACT-3 [Caenorhabditis elegans]	41796.6	3	14	0.87	KDLYANTVLSGGTTMYPGIADR	114	2344.15
N2 Neg Ctrl IP	Protein ACT-3 [Caenorhabditis elegans]	41796.6	3	14	0.87	KYSVWIGGSILASLSTFQQMWISK	52.5	2730.43
N2 Neg Ctrl IP	Protein ACT-3 [Caenorhabditis elegans]	41796.6	3	14	0.87	LCYVALDFEQEMATAASSSSLEK	119	2551.16
N2 Neg Ctrl IP	Protein ACT-3 [Caenorhabditis elegans]	41796.6	3	14	0.87	LCYVALDFEQEMATAASSSSLEKSYELPDGQVITVGNER	91.4	4310.98
N2 Neg Ctrl IP	Protein ACT-3 [Caenorhabditis elegans]	41796.6	3	14	0.87	LDLAGRDLTDYLMK	45	1623.84
N2 Neg Ctrl IP	Protein ACT-3 [Caenorhabditis elegans]	41796.6	3	14	0.87	MQKEITALAPSTMK	87.5	1548.81
N2 Neg Ctrl IP	Protein ACT-3 [Caenorhabditis elegans]	41796.6	3	14	0.87	MTQIMFETFNTPAMYVAIQAVLSLYASGR	31.5	3253.61
N2 Neg Ctrl IP	Protein ACT-3 [Caenorhabditis elegans]	41796.6	3	14	0.87	QEYDESGPSIVHR	62.8	1516.7
N2 Neg Ctrl IP	Protein ACT-3 [Caenorhabditis elegans]	41796.6	3	14	0.87	QEYDESGPSIVHRK	56.6	1644.8
N2 Neg Ctrl IP	Protein ACT-3 [Caenorhabditis elegans]	41796.6	3	14	0.87	SYELPDGQVITVGNER	83.2	1776.88
N2 Neg Ctrl IP	Protein ACT-3 [Caenorhabditis elegans]	41796.6	3	14	0.87	TTGVVLDSGDGVTHTVPIYEGYALPHAILR	84.3	3151.64
N2 Neg Ctrl IP	Protein ACT-3 [Caenorhabditis elegans]	41796.6	3	14	0.87	VAPEEHPVLLTEAPLNPK	63.9	1954.06
N2 Neg Ctrl IP	Protein ACT-3 [Caenorhabditis elegans]	41796.6	3	14	0.87	YSVWIGGSILASLSTFQQMWISKQEYDESGPSIVHR	72.3	4116.02
N2 Neg Ctrl IP	Protein MIF-4 [Caenorhabditis elegans]	13808.3	6	8	0.496	EIPVAIVNFQTTRPSSR	59.3	1915.04
N2 Neg Ctrl IP	Protein MIF-4 [Caenorhabditis elegans]	13808.3	6	8	0.496	IENDSYAK	38	939.442
N2 Neg Ctrl IP	Protein MIF-4 [Caenorhabditis elegans]	13808.3	6	8	0.496	IGFENKEIPVAIVNFQTTRPSSR	33.2	2603.39
N2 Neg Ctrl IP	Protein MIF-4 [Caenorhabditis elegans]	13808.3	6	8	0.496	KLTSVLNEQLK	40.4	1272.75
N2 Neg Ctrl IP	Protein MIF-4 [Caenorhabditis elegans]	13808.3	6	8	0.496	LDPAHIFISFDFKDAK	22.9	1863.96
N2 Neg Ctrl IP	Protein MIF-4 [Caenorhabditis elegans]	13808.3	6	8	0.496	MRIGFENK	31.3	994.514
N2 Neg Ctrl IP	Protein EEF-1A.1 [Caenorhabditis elegans]	50668.6	10	14	0.322	AVPFVPISGFNGDNMLEVSSNMPWFK	70.3	2883.38
N2 Neg Ctrl IP	Protein EEF-1A.1 [Caenorhabditis elegans]	50668.6	10	14	0.322	AVPFVPISGFNGDNMLEVSSNMPWFKGWAVER	64.8	3582.72
N2 Neg Ctrl IP	Protein EEF-1A.1 [Caenorhabditis elegans]	50668.6	10	14	0.322	EHALLAQTLGVK	52.1	1279.74
N2 Neg Ctrl IP	Protein EEF-1A.1 [Caenorhabditis elegans]	50668.6	10	14	0.322	FTEITNEVSGFIKK	50.5	1612.86
N2 Neg Ctrl IP	Protein EEF-1A.1 [Caenorhabditis elegans]	50668.6	10	14	0.322	MDSTEPPFSEAR	49.3	1366.59
N2 Neg Ctrl IP	Protein EEF-1A.1 [Caenorhabditis elegans]	50668.6	10	14	0.322	QLIVACNK	36.4	945.519
N2 Neg Ctrl IP	Protein EEF-1A.1 [Caenorhabditis elegans]	50668.6	10	14	0.322	QTVAVGVIK	40.6	914.567
N2 Neg Ctrl IP	Protein EEF-1A.1 [Caenorhabditis elegans]	50668.6	10	14	0.322	SGDAGIVELIPTKPLCVESFTDYAPLGR	68.7	3005.53
N2 Neg Ctrl IP	Protein EEF-1A.1 [Caenorhabditis elegans]	50668.6	10	14	0.322	STTTGHLIYK	42.9	1120.6
N2 Neg Ctrl IP	Protein EEF-1A.1 [Caenorhabditis elegans]	50668.6	10	14	0.322	VETGIIKPGMVVTFAPQNVTTEVK	40.3	2558.39
N2 Neg Ctrl IP	Protein RPS-23, isoform a [Caenorhabditis elegans]	15874.8	1	1	0.0769	SNPFGGASHAK	38.2	1072.52
N2 Neg Ctrl IP	Protein SUF-1 [Caenorhabditis elegans]	84624.5	2	2	0.0313	DQYREEMAK	34.8	1169.53
N2 Neg Ctrl IP	Protein SUF-1 [Caenorhabditis elegans]	84624.5	2	2	0.0313	TNPLQTEEYGQHAR	53.5	1643.78
N2 Neg Ctrl IP	Protein RPL-10 [Caenorhabditis elegans]	24749.4	3	3	0.178	LRSDGVGVQLQR	31.9	1327.74
N2 Neg Ctrl IP	Protein RPL-10 [Caenorhabditis elegans]	24749.4	3	3	0.178	MLSCAGADRLQTGMR	27.6	1666.78
N2 Neg Ctrl IP	Protein RPL-10 [Caenorhabditis elegans]	24749.4	3	3	0.178	VDIGDILFSMR	78.6	1265.66
N2 Neg Ctrl IP	Protein R13H4.2, isoform a [Caenorhabditis elegans]	23855.7	2	2	0.129	YLNYTYTPYR	41.2	1353.65
N2 Neg Ctrl IP	Protein R13H4.2, isoform a [Caenorhabditis elegans]	23855.7	2	2	0.129	YSDKYRPQWHTVYQSTPYR	4.29	2475.18
N2 Neg Ctrl IP	Protein KETN-1, isoform e [Caenorhabditis elegans]	554864	139	170	0.444	AAAPEKPDAEHDAPQFIEPLDSIDRMEFQSAHFQTK	38.3	4066.92
N2 Neg Ctrl IP	Protein KETN-1, isoform e [Caenorhabditis elegans]	554864	139	170	0.444	AAILGDTQHEQSWQR	93.2	1739.85
N2 Neg Ctrl IP	Protein KETN-1, isoform e [Caenorhabditis elegans]	554864	139	170	0.444	AENSLGQAETVATIR	100	1559.8
N2 Neg Ctrl IP	Protein KETN-1, isoform e [Caenorhabditis elegans]	554864	139	170	0.444	AETSCEFQVDR	49.3	1341.57
N2 Neg Ctrl IP	Protein KETN-1, isoform e [Caenorhabditis elegans]	554864	139	170	0.444	AETSCEFQVDRLK	72	1582.75
N2 Neg Ctrl IP	Protein KETN-1, isoform e [Caenorhabditis elegans]	554864	139	170	0.444	AFETVTFSAK	53	1100.56
N2 Neg Ctrl IP	Protein KETN-1, isoform e [Caenorhabditis elegans]	554864	139	170	0.444	AFNKLGESENQATIIIVPK	65.5	2072.14
N2 Neg Ctrl IP	Protein KETN-1, isoform e [Caenorhabditis elegans]	554864	139	170	0.444	AIHDFGFVVLQLTPAEPQDSGTWTCR	47	2945.43
N2 Neg Ctrl IP	Protein KETN-1, isoform e [Caenorhabditis elegans]	554864	139	170	0.444	APDFSAR	38.3	763.373
N2 Neg Ctrl IP	Protein KETN-1, isoform e [Caenorhabditis elegans]	554864	139	170	0.444	AQSPIEPMESQELIQK	85.8	1827.92
N2 Neg Ctrl IP	Protein KETN-1, isoform e [Caenorhabditis elegans]	554864	139	170	0.444	ASNAKGDAEVQAQLTVTGNAVILGDTQHEQSWQK	35.6	3594.78
N2 Neg Ctrl IP	Protein KETN-1, isoform e [Caenorhabditis elegans]	554864	139	170	0.444	ASNLLGEAIR	70.7	1043.58
N2 Neg Ctrl IP	Protein KETN-1, isoform e [Caenorhabditis elegans]	554864	139	170	0.444	ATNLIGEATTDIFLECKPR	98.2	2149.1
N2 Neg Ctrl IP	Protein KETN-1, isoform e [Caenorhabditis elegans]	554864	139	170	0.444	ATNQHGSDEVSTELK	57.6	1615.76
N2 Neg Ctrl IP	Protein KETN-1, isoform e [Caenorhabditis elegans]	554864	139	170	0.444	ATPVNDPTMVIEWFVNGRPLLTGSR	22.6	2771.42
N2 Neg Ctrl IP	Protein KETN-1, isoform e [Caenorhabditis elegans]	554864	139	170	0.444	AVEILEDNLR	64.4	1171.63
N2 Neg Ctrl IP	Protein KETN-1, isoform e [Caenorhabditis elegans]	554864	139	170	0.444	AVNRVGEAVTSTK	56	1331.73
N2 Neg Ctrl IP	Protein KETN-1, isoform e [Caenorhabditis elegans]	554864	139	170	0.444	AVSAFGEAATSCTVK	89.2	1498.72
N2 Neg Ctrl IP	Protein KETN-1, isoform e [Caenorhabditis elegans]	554864	139	170	0.444	AWNDSGNAVTSANVGVQGSEGLLLDTSHPASLQK	137	3423.68
N2 Neg Ctrl IP	Protein KETN-1, isoform e [Caenorhabditis elegans]	554864	139	170	0.444	CAPKDAILGAVQHPR	41.8	1632.86
N2 Neg Ctrl IP	Protein KETN-1, isoform e [Caenorhabditis elegans]	554864	139	170	0.444	DAILGAVQHPR	25.7	1176.65
N2 Neg Ctrl IP	Protein KETN-1, isoform e [Caenorhabditis elegans]	554864	139	170	0.444	DDNFYNKLSYVELQKPQFK	34	2376.19
N2 Neg Ctrl IP	Protein KETN-1, isoform e [Caenorhabditis elegans]	554864	139	170	0.444	DGQPLMNSNR	54.7	1131.52
N2 Neg Ctrl IP	Protein KETN-1, isoform e [Caenorhabditis elegans]	554864	139	170	0.444	DKKPVLLGHR	27.4	1162.71
N2 Neg Ctrl IP	Protein KETN-1, isoform e [Caenorhabditis elegans]	554864	139	170	0.444	DLKETPAVVKPVIEETR	38.9	1924.08
N2 Neg Ctrl IP	Protein KETN-1, isoform e [Caenorhabditis elegans]	554864	139	170	0.444	DNKNIYWSEQGGAVQPK	57.1	1933.94
N2 Neg Ctrl IP	Protein KETN-1, isoform e [Caenorhabditis elegans]	554864	139	170	0.444	DTLGSLGPAFEAAPKPDAQK	24.3	2013.03
N2 Neg Ctrl IP	Protein KETN-1, isoform e [Caenorhabditis elegans]	554864	139	170	0.444	EGIISATQLPER	46.5	1313.71
N2 Neg Ctrl IP	Protein KETN-1, isoform e [Caenorhabditis elegans]	554864	139	170	0.444	EIQFAHSSQDLTPK	28.6	1600.8
N2 Neg Ctrl IP	Protein KETN-1, isoform e [Caenorhabditis elegans]	554864	139	170	0.444	EVILQDSLQPQSLDR	80.8	1740.91
N2 Neg Ctrl IP	Protein KETN-1, isoform e [Caenorhabditis elegans]	554864	139	170	0.444	EVILQDSLQPQSLDRIR	29	2010.1
N2 Neg Ctrl IP	Protein KETN-1, isoform e [Caenorhabditis elegans]	554864	139	170	0.444	FECAVTGYPRPK	39	1424.7
N2 Neg Ctrl IP	Protein KETN-1, isoform e [Caenorhabditis elegans]	554864	139	170	0.444	FEGSLQSQQLVEGQSAR	105	1863.92
N2 Neg Ctrl IP	Protein KETN-1, isoform e [Caenorhabditis elegans]	554864	139	170	0.444	FHPMFDFGYVALDLLYAYPQDSGTYTLVAR	32.8	3470.68
N2 Neg Ctrl IP	Protein KETN-1, isoform e [Caenorhabditis elegans]	554864	139	170	0.444	FKLNFDGLHYLTVSK	53.8	1781.96
N2 Neg Ctrl IP	Protein KETN-1, isoform e [Caenorhabditis elegans]	554864	139	170	0.444	FKLTTDFGYISLDIAHTVPEDSGVYSVK	28	3102.57
N2 Neg Ctrl IP	Protein KETN-1, isoform e [Caenorhabditis elegans]	554864	139	170	0.444	FLSQIQPFHCEQELGR	56.3	1988.96
N2 Neg Ctrl IP	Protein KETN-1, isoform e [Caenorhabditis elegans]	554864	139	170	0.444	FRQEYEFGNAILTIVHVLPHDSGVYTCR	61.1	3321.65
N2 Neg Ctrl IP	Protein KETN-1, isoform e [Caenorhabditis elegans]	554864	139	170	0.444	FSAEVDGNPEPTVQWQFK	64.7	2079.97
N2 Neg Ctrl IP	Protein KETN-1, isoform e [Caenorhabditis elegans]	554864	139	170	0.444	FSLNVLQAK	55	1019.59
N2 Neg Ctrl IP	Protein KETN-1, isoform e [Caenorhabditis elegans]	554864	139	170	0.444	FTSALAGPPELQEGQQAHLECQVTPVADPR	57.1	3247.57
N2 Neg Ctrl IP	Protein KETN-1, isoform e [Caenorhabditis elegans]	554864	139	170	0.444	FTSQIQPIVVDEGKGAQFSAQFSGFPDPTIR	75.7	3368.68
N2 Neg Ctrl IP	Protein KETN-1, isoform e [Caenorhabditis elegans]	554864	139	170	0.444	FVIEFAGAAPVK	66.5	1248.7
N2 Neg Ctrl IP	Protein KETN-1, isoform e [Caenorhabditis elegans]	554864	139	170	0.444	FVTQLHSLDGVVEGQPSHFEAQFIPFSDPK	35.3	3357.64
N2 Neg Ctrl IP	Protein KETN-1, isoform e [Caenorhabditis elegans]	554864	139	170	0.444	FVTQLNSSLGELQEGVPIHLEAQVEPTNDNQLTVQWFHNGQPLANGHR	76.9	5365.62
N2 Neg Ctrl IP	Protein KETN-1, isoform e [Caenorhabditis elegans]	554864	139	170	0.444	GAIAEDSGTYSVR	85.4	1325.63
N2 Neg Ctrl IP	Protein KETN-1, isoform e [Caenorhabditis elegans]	554864	139	170	0.444	GAQAPAGTHLDLPNFHSDLR	38.2	2118.04
N2 Neg Ctrl IP	Protein KETN-1, isoform e [Caenorhabditis elegans]	554864	139	170	0.444	GGSASYQSSDKAAADSPHFIAK	60.7	2195.04
N2 Neg Ctrl IP	Protein KETN-1, isoform e [Caenorhabditis elegans]	554864	139	170	0.444	GHEHGAALVNARPPQFLVHPQSVAAK	29.7	2731.45
N2 Neg Ctrl IP	Protein KETN-1, isoform e [Caenorhabditis elegans]	554864	139	170	0.444	GMELEEVNLK	57	1161.58
N2 Neg Ctrl IP	Protein KETN-1, isoform e [Caenorhabditis elegans]	554864	139	170	0.444	GTIYTDSQHPESWQK	59.5	1776.82
N2 Neg Ctrl IP	Protein KETN-1, isoform e [Caenorhabditis elegans]	554864	139	170	0.444	HADSLPIIGYLDSHQIHIGPQSVERPEEFNSLEAPK	43.7	4025.99
N2 Neg Ctrl IP	Protein KETN-1, isoform e [Caenorhabditis elegans]	554864	139	170	0.444	HDAGEYTFR	32.7	1095.49
N2 Neg Ctrl IP	Protein KETN-1, isoform e [Caenorhabditis elegans]	554864	139	170	0.444	HGQTMISAK	55.7	972.493
N2 Neg Ctrl IP	Protein KETN-1, isoform e [Caenorhabditis elegans]	554864	139	170	0.444	HLIAADAGEYK	38.6	1187.61
N2 Neg Ctrl IP	Protein KETN-1, isoform e [Caenorhabditis elegans]	554864	139	170	0.444	HLIAADAGEYKCVATNVK	51.2	1960
N2 Neg Ctrl IP	Protein KETN-1, isoform e [Caenorhabditis elegans]	554864	139	170	0.444	HTGVYSCK	24.5	951.435
N2 Neg Ctrl IP	Protein KETN-1, isoform e [Caenorhabditis elegans]	554864	139	170	0.444	IAELETPIQR	46.1	1169.65
N2 Neg Ctrl IP	Protein KETN-1, isoform e [Caenorhabditis elegans]	554864	139	170	0.444	IAVESSTQIDAPQVVQQLVDSVENILEGDSIHLECR	70.8	3992.98
N2 Neg Ctrl IP	Protein KETN-1, isoform e [Caenorhabditis elegans]	554864	139	170	0.444	IEWFHDGRPLMFGSR	25.5	1847.9
N2 Neg Ctrl IP	Protein KETN-1, isoform e [Caenorhabditis elegans]	554864	139	170	0.444	ILYDSQHPVSWER	74.8	1629.8
N2 Neg Ctrl IP	Protein KETN-1, isoform e [Caenorhabditis elegans]	554864	139	170	0.444	INYLENLNK	38.3	1120.6
N2 Neg Ctrl IP	Protein KETN-1, isoform e [Caenorhabditis elegans]	554864	139	170	0.444	INYLENLNKYGR	25.8	1496.79
N2 Neg Ctrl IP	Protein KETN-1, isoform e [Caenorhabditis elegans]	554864	139	170	0.444	IQELEAPK	36.5	927.515
N2 Neg Ctrl IP	Protein KETN-1, isoform e [Caenorhabditis elegans]	554864	139	170	0.444	IQEIEAPKPAPQEVPDLPHQPPAFVK	44.5	2876.52
N2 Neg Ctrl IP	Protein KETN-1, isoform e [Caenorhabditis elegans]	554864	139	170	0.444	IQEIEAPRAPGAEPEGPVYEKPSFVQPLQSVGDLPEGSVALLEAR	37.3	4772.43
N2 Neg Ctrl IP	Protein KETN-1, isoform e [Caenorhabditis elegans]	554864	139	170	0.444	IQELEAIDKYAR	57.7	1448.77
N2 Neg Ctrl IP	Protein KETN-1, isoform e [Caenorhabditis elegans]	554864	139	170	0.444	IQELEAPKIVEEIEEIVQK	63	2237.23
N2 Neg Ctrl IP	Protein KETN-1, isoform e [Caenorhabditis elegans]	554864	139	170	0.444	IQILEAPK	28.5	911.556
N2 Neg Ctrl IP	Protein KETN-1, isoform e [Caenorhabditis elegans]	554864	139	170	0.444	IQLIEAPRAPGEEEPDVK	32.1	1991.04
N2 Neg Ctrl IP	Protein KETN-1, isoform e [Caenorhabditis elegans]	554864	139	170	0.444	IQPINDPTLR	34	1166.65
N2 Neg Ctrl IP	Protein KETN-1, isoform e [Caenorhabditis elegans]	554864	139	170	0.444	IQVLEAPR	48.7	925.547
N2 Neg Ctrl IP	Protein KETN-1, isoform e [Caenorhabditis elegans]	554864	139	170	0.444	IQWFKDGQPLMNSNR	59.3	1833.91
N2 Neg Ctrl IP	Protein KETN-1, isoform e [Caenorhabditis elegans]	554864	139	170	0.444	IRTIHDFGYVGLEFLHIHPEDTGTYTCK	64.9	3319.62
N2 Neg Ctrl IP	Protein KETN-1, isoform e [Caenorhabditis elegans]	554864	139	170	0.444	ISCTNEFGVATLLIK	101	1665.89
N2 Neg Ctrl IP	Protein KETN-1, isoform e [Caenorhabditis elegans]	554864	139	170	0.444	ITVLPRPSLDYTSQTHGNQQDSLESHFK	39.8	3199.57
N2 Neg Ctrl IP	Protein KETN-1, isoform e [Caenorhabditis elegans]	554864	139	170	0.444	IWNPEGEAVSSATLK	85.6	1601.82
N2 Neg Ctrl IP	Protein KETN-1, isoform e [Caenorhabditis elegans]	554864	139	170	0.444	LACQGASHVITDSQMPQGLR	58.8	2169.05
N2 Neg Ctrl IP	Protein KETN-1, isoform e [Caenorhabditis elegans]	554864	139	170	0.444	LEIKYTPVEDPNLR	47.2	1686.91
N2 Neg Ctrl IP	Protein KETN-1, isoform e [Caenorhabditis elegans]	554864	139	170	0.444	LNVNLQK	43.6	828.494
N2 Neg Ctrl IP	Protein KETN-1, isoform e [Caenorhabditis elegans]	554864	139	170	0.444	LSYVELQKPQFK	43.7	1479.82
N2 Neg Ctrl IP	Protein KETN-1, isoform e [Caenorhabditis elegans]	554864	139	170	0.444	LTCTPKEGIISATQLPER	36.9	2014.06
N2 Neg Ctrl IP	Protein KETN-1, isoform e [Caenorhabditis elegans]	554864	139	170	0.444	LTPINDPDLR	37.8	1153.62
N2 Neg Ctrl IP	Protein KETN-1, isoform e [Caenorhabditis elegans]	554864	139	170	0.444	LTTDFGYISLDIAHTVPEDSGVYSVK	48.5	2827.4
N2 Neg Ctrl IP	Protein KETN-1, isoform e [Caenorhabditis elegans]	554864	139	170	0.444	LVIEWFHNGQPVNHTNR	53.8	2062.03
N2 Neg Ctrl IP	Protein KETN-1, isoform e [Caenorhabditis elegans]	554864	139	170	0.444	MINDFGWVIMDIAQTEPR	82.4	2136.03
N2 Neg Ctrl IP	Protein KETN-1, isoform e [Caenorhabditis elegans]	554864	139	170	0.444	MTVEWYHNGNPLPAAHR	34.8	1993.93
N2 Neg Ctrl IP	Protein KETN-1, isoform e [Caenorhabditis elegans]	554864	139	170	0.444	MVHDFGFAVLDILHLLK	34.1	1968.08
N2 Neg Ctrl IP	Protein KETN-1, isoform e [Caenorhabditis elegans]	554864	139	170	0.444	NAAGEAVSTATIEVQGK	123	1645.84
N2 Neg Ctrl IP	Protein KETN-1, isoform e [Caenorhabditis elegans]	554864	139	170	0.444	NAAGEAVSTATIEVQGKEVILQDSLQPQSLDR	79.3	3368.72
N2 Neg Ctrl IP	Protein KETN-1, isoform e [Caenorhabditis elegans]	554864	139	170	0.444	NEDVAEYKVEASNPAGK	97.5	1820.87
N2 Neg Ctrl IP	Protein KETN-1, isoform e [Caenorhabditis elegans]	554864	139	170	0.444	NELGEAR	29.7	788.39
N2 Neg Ctrl IP	Protein KETN-1, isoform e [Caenorhabditis elegans]	554864	139	170	0.444	NFDYVNLDILALYGEDSGVYTCK	0.12	2669.24
N2 Neg Ctrl IP	Protein KETN-1, isoform e [Caenorhabditis elegans]	554864	139	170	0.444	NGQPLGASQLVQTK	57.6	1440.78
N2 Neg Ctrl IP	Protein KETN-1, isoform e [Caenorhabditis elegans]	554864	139	170	0.444	NGQPLPEASR	38.9	1068.54
N2 Neg Ctrl IP	Protein KETN-1, isoform e [Caenorhabditis elegans]	554864	139	170	0.444	NGVPLAHGSK	31.2	980.516
N2 Neg Ctrl IP	Protein KETN-1, isoform e [Caenorhabditis elegans]	554864	139	170	0.444	NIYWSEQGGAVQPK	66.8	1576.78
N2 Neg Ctrl IP	Protein KETN-1, isoform e [Caenorhabditis elegans]	554864	139	170	0.444	NLQVTENQPARFECAVTGYPRPK	32	2675.34
N2 Neg Ctrl IP	Protein KETN-1, isoform e [Caenorhabditis elegans]	554864	139	170	0.444	NRAGEAQSTVDINCGHTGGNFTDSFHPNSLHR	49.4	3498.55
N2 Neg Ctrl IP	Protein KETN-1, isoform e [Caenorhabditis elegans]	554864	139	170	0.444	NSEGEDRTSGQLSCTTR	55.8	1897.83
N2 Neg Ctrl IP	Protein KETN-1, isoform e [Caenorhabditis elegans]	554864	139	170	0.444	NSLGEAQTIANFTVLPR	79.8	1830.97
N2 Neg Ctrl IP	Protein KETN-1, isoform e [Caenorhabditis elegans]	554864	139	170	0.444	NTEGETISTATLDIFQNDDFR	109	2387.1
N2 Neg Ctrl IP	Protein KETN-1, isoform e [Caenorhabditis elegans]	554864	139	170	0.444	NTEGETISTATLDIFQNDDFRQTK	56	2744.3
N2 Neg Ctrl IP	Protein KETN-1, isoform e [Caenorhabditis elegans]	554864	139	170	0.444	QAPPTISQQLKPLQGELGK	18.9	2033.14
N2 Neg Ctrl IP	Protein KETN-1, isoform e [Caenorhabditis elegans]	554864	139	170	0.444	QAPQFTIPLR	50.1	1170.66
N2 Neg Ctrl IP	Protein KETN-1, isoform e [Caenorhabditis elegans]	554864	139	170	0.444	QCVITVTPAGQILSDTQHQESLGKINYLENLNK	44.2	3711.9
N2 Neg Ctrl IP	Protein KETN-1, isoform e [Caenorhabditis elegans]	554864	139	170	0.444	QGIAEVEDRTCDAAPK	70	1759.83
N2 Neg Ctrl IP	Protein KETN-1, isoform e [Caenorhabditis elegans]	554864	139	170	0.444	QKLEEADPEPK	31.6	1283.65
N2 Neg Ctrl IP	Protein KETN-1, isoform e [Caenorhabditis elegans]	554864	139	170	0.444	QQQPTQVTNGGIK	36.3	1399.72
N2 Neg Ctrl IP	Protein KETN-1, isoform e [Caenorhabditis elegans]	554864	139	170	0.444	QTLSHGFASLDIPQTSSNDSGLYSCR	77.9	2841.31
N2 Neg Ctrl IP	Protein KETN-1, isoform e [Caenorhabditis elegans]	554864	139	170	0.444	RNIYLDTHHESSWQK	24.5	1913.93
N2 Neg Ctrl IP	Protein KETN-1, isoform e [Caenorhabditis elegans]	554864	139	170	0.444	RRPEEIEQELK	27.7	1426.77
N2 Neg Ctrl IP	Protein KETN-1, isoform e [Caenorhabditis elegans]	554864	139	170	0.444	SDGTVIQSGGK	82.7	1048.53
N2 Neg Ctrl IP	Protein KETN-1, isoform e [Caenorhabditis elegans]	554864	139	170	0.444	SDLQQFEQHR	34.3	1287.61
N2 Neg Ctrl IP	Protein KETN-1, isoform e [Caenorhabditis elegans]	554864	139	170	0.444	SLLLDTMHDASWK	26.9	1516.75
N2 Neg Ctrl IP	Protein KETN-1, isoform e [Caenorhabditis elegans]	554864	139	170	0.444	SNVELVVGTEK	75.9	1174.63
N2 Neg Ctrl IP	Protein KETN-1, isoform e [Caenorhabditis elegans]	554864	139	170	0.444	SPEAPEFTGK	56.7	1062.51
N2 Neg Ctrl IP	Protein KETN-1, isoform e [Caenorhabditis elegans]	554864	139	170	0.444	SQEVFEGQQIHLETK	82.4	1772.88
N2 Neg Ctrl IP	Protein KETN-1, isoform e [Caenorhabditis elegans]	554864	139	170	0.444	SRTPVNQLQDVSASK	87.8	1629.86
N2 Neg Ctrl IP	Protein KETN-1, isoform e [Caenorhabditis elegans]	554864	139	170	0.444	SSPKFEGSLQSQQLVEGQSAR	68	2263.13
N2 Neg Ctrl IP	Protein KETN-1, isoform e [Caenorhabditis elegans]	554864	139	170	0.444	STLDFGFACLDLLYALPDDTGEYHCVATNR	76	3435.55
N2 Neg Ctrl IP	Protein KETN-1, isoform e [Caenorhabditis elegans]	554864	139	170	0.444	TANGSANGSANGSAVHAANGGPSSQQAR	78.1	2542.11
N2 Neg Ctrl IP	Protein KETN-1, isoform e [Caenorhabditis elegans]	554864	139	170	0.444	TPVNQLQDVSASK	78	1386.72
N2 Neg Ctrl IP	Protein KETN-1, isoform e [Caenorhabditis elegans]	554864	139	170	0.444	TQLQNIGVLEGEFCR	69.2	1763.87
N2 Neg Ctrl IP	Protein KETN-1, isoform e [Caenorhabditis elegans]	554864	139	170	0.444	TRHDFGYVALDILYAFAQDTGEWACVAR	94.7	3245.55
N2 Neg Ctrl IP	Protein KETN-1, isoform e [Caenorhabditis elegans]	554864	139	170	0.444	TSGQLSCTTR	60	1110.52
N2 Neg Ctrl IP	Protein KETN-1, isoform e [Caenorhabditis elegans]	554864	139	170	0.444	TSVQWYLNGNPLSASSR	80.8	1880.91
N2 Neg Ctrl IP	Protein KETN-1, isoform e [Caenorhabditis elegans]	554864	139	170	0.444	VLYLEPHHPEGLER	43	1688.88
N2 Neg Ctrl IP	Protein KETN-1, isoform e [Caenorhabditis elegans]	554864	139	170	0.444	VSANIAVIGHGSFIQQQQSGSQFGGTAYQSK	96.3	3196.57
N2 Neg Ctrl IP	Protein KETN-1, isoform e [Caenorhabditis elegans]	554864	139	170	0.444	VSWLKDGQPLPNANR	74.1	1694.9
N2 Neg Ctrl IP	Protein KETN-1, isoform e [Caenorhabditis elegans]	554864	139	170	0.444	VTPDSAGEYQIVIR	54.1	1547.81
N2 Neg Ctrl IP	Protein KETN-1, isoform e [Caenorhabditis elegans]	554864	139	170	0.444	VTPINDPR	26.2	911.495
N2 Neg Ctrl IP	Protein KETN-1, isoform e [Caenorhabditis elegans]	554864	139	170	0.444	VTPQTDPNLRIQWFK	1.88	1845.94
N2 Neg Ctrl IP	Protein KETN-1, isoform e [Caenorhabditis elegans]	554864	139	170	0.444	VVGGGGVSYEWQSTAER	69.4	1781.85
N2 Neg Ctrl IP	Protein KETN-1, isoform e [Caenorhabditis elegans]	554864	139	170	0.444	VVGTPTPSLTWQK	52	1413.77
N2 Neg Ctrl IP	Protein KETN-1, isoform e [Caenorhabditis elegans]	554864	139	170	0.444	YEPVNDNQLQVQWYHDGRPLK	28.8	2599.27
N2 Neg Ctrl IP	Protein KETN-1, isoform e [Caenorhabditis elegans]	554864	139	170	0.444	YKIENGPDGSGR	41.8	1293.61
N2 Neg Ctrl IP	Protein KETN-1, isoform e [Caenorhabditis elegans]	554864	139	170	0.444	YQPPVEEMERVNLK	29	1731.87
N2 Neg Ctrl IP	Protein KETN-1, isoform e [Caenorhabditis elegans]	554864	139	170	0.444	YTLVVYNSAGR	26.6	1242.65
N2 Neg Ctrl IP	Protein PAR-5, isoform a [Caenorhabditis elegans]	28191	2	2	0.169	QAFDDAIAELDTLNEDSYKDSTLIMQLLR	120	3329.61
N2 Neg Ctrl IP	Protein PAR-5, isoform a [Caenorhabditis elegans]	28191	2	2	0.169	VTEQGQELSNEER	83.2	1518.7
N2 Neg Ctrl IP	Protein CAH-4, isoform a [Caenorhabditis elegans]	26170.3	20	37	0.761	ADALNIDYK	47.9	1023.5
N2 Neg Ctrl IP	Protein CAH-4, isoform a [Caenorhabditis elegans]	26170.3	20	37	0.761	ATGNATPIAMPK	67.6	1187.61
N2 Neg Ctrl IP	Protein CAH-4, isoform a [Caenorhabditis elegans]	26170.3	20	37	0.761	DFHIEHLLPSPDK	23	1547.79
N2 Neg Ctrl IP	Protein CAH-4, isoform a [Caenorhabditis elegans]	26170.3	20	37	0.761	DFHIEHLLPSPDKR	57.4	1703.89
N2 Neg Ctrl IP	Protein CAH-4, isoform a [Caenorhabditis elegans]	26170.3	20	37	0.761	EFVTYLGSLTTPPYNECVIWTLFTEPVEVSFGQLNVLR	31.8	4419.23
N2 Neg Ctrl IP	Protein CAH-4, isoform a [Caenorhabditis elegans]	26170.3	20	37	0.761	EGKYNDNYHGLIDTVR	65.8	1893.91
N2 Neg Ctrl IP	Protein CAH-4, isoform a [Caenorhabditis elegans]	26170.3	20	37	0.761	EGSEHFLDGKQLSGEVHFVFWNTSYESFNVALSKPDGLAVVGVFLK	70.3	5085.53
N2 Neg Ctrl IP	Protein CAH-4, isoform a [Caenorhabditis elegans]	26170.3	20	37	0.761	FALAQFHAHWGSNSK	75.8	1700.83
N2 Neg Ctrl IP	Protein CAH-4, isoform a [Caenorhabditis elegans]	26170.3	20	37	0.761	FALAQFHAHWGSNSKEGSEHFLDGK	25.9	2800.32
N2 Neg Ctrl IP	Protein CAH-4, isoform a [Caenorhabditis elegans]	26170.3	20	37	0.761	KATGNATPIAMPK	64.9	1299.71
N2 Neg Ctrl IP	Protein CAH-4, isoform a [Caenorhabditis elegans]	26170.3	20	37	0.761	NCGTFLTANHLPSSK	76.9	1646.8
N2 Neg Ctrl IP	Protein CAH-4, isoform a [Caenorhabditis elegans]	26170.3	20	37	0.761	NIIPANHR	30.2	935.506
N2 Neg Ctrl IP	Protein CAH-4, isoform a [Caenorhabditis elegans]	26170.3	20	37	0.761	QLSGEVHFVFWNTSYESFNVALSKPDGLAVVGVFLK	35.4	3987.02
N2 Neg Ctrl IP	Protein CAH-4, isoform a [Caenorhabditis elegans]	26170.3	20	37	0.761	QSPIDIVPQHVCCDTDVCK	31.1	2271.02
N2 Neg Ctrl IP	Protein CAH-4, isoform a [Caenorhabditis elegans]	26170.3	20	37	0.761	QSPIDIVPQHVCCDTDVCKADALNIDYK	62.2	3274.52
N2 Neg Ctrl IP	Protein CAH-4, isoform a [Caenorhabditis elegans]	26170.3	20	37	0.761	RNCGTFLTANHLPSSK	49.3	1802.9
N2 Neg Ctrl IP	Protein CAH-4, isoform a [Caenorhabditis elegans]	26170.3	20	37	0.761	SGDCCDVLVSEGGFLVNVK	84.5	2054.95
N2 Neg Ctrl IP	Protein CAH-4, isoform a [Caenorhabditis elegans]	26170.3	20	37	0.761	SGDCCDVLVSEGGFLVNVKR	87.3	2211.05
N2 Neg Ctrl IP	Protein CAH-4, isoform a [Caenorhabditis elegans]	26170.3	20	37	0.761	YNDNYHGLIDTVR	74.7	1579.75
N2 Neg Ctrl IP	Protein CAH-4, isoform a [Caenorhabditis elegans]	26170.3	20	37	0.761	YNDNYHGLIDTVRK	53.9	1707.85
N2 Neg Ctrl IP	Protein VIT-5 [Caenorhabditis elegans]	186441	5	5	0.0412	APLTTCYSLVAK	32.7	1323.7
N2 Neg Ctrl IP	Protein VIT-5 [Caenorhabditis elegans]	186441	5	5	0.0412	ELSDEFKELLELPFR	29.8	1864.97
N2 Neg Ctrl IP	Protein VIT-5 [Caenorhabditis elegans]	186441	5	5	0.0412	NQDSEYVEAEEK	75.8	1440.61
N2 Neg Ctrl IP	Protein VIT-5 [Caenorhabditis elegans]	186441	5	5	0.0412	STNPCYQQLAVR	49.1	1436.7
N2 Neg Ctrl IP	Protein VIT-5 [Caenorhabditis elegans]	186441	5	5	0.0412	TELLAARPQMPSSLR	36.5	1669.91
N2 Neg Ctrl IP	Protein F40A3.6 [Caenorhabditis elegans]	30245.2	17	30	0.682	DFDSSPLSPYLYQSHPYVR	23	2271.07
N2 Neg Ctrl IP	Protein F40A3.6 [Caenorhabditis elegans]	30245.2	17	30	0.682	DHGLSATSMLR	44.1	1187.58
N2 Neg Ctrl IP	Protein F40A3.6 [Caenorhabditis elegans]	30245.2	17	30	0.682	ELASYDKEDYEDFTGEPK	77.9	2135.93
N2 Neg Ctrl IP	Protein F40A3.6 [Caenorhabditis elegans]	30245.2	17	30	0.682	FISKIEETLAMVR	76.1	1536.85
N2 Neg Ctrl IP	Protein F40A3.6 [Caenorhabditis elegans]	30245.2	17	30	0.682	GNSSFDRDIVPGGAHTK	45	1757.86
N2 Neg Ctrl IP	Protein F40A3.6 [Caenorhabditis elegans]	30245.2	17	30	0.682	IEETLAMVR	63.1	1061.57
N2 Neg Ctrl IP	Protein F40A3.6 [Caenorhabditis elegans]	30245.2	17	30	0.682	IIGSNFVQLTSRPK	82.4	1559.89
N2 Neg Ctrl IP	Protein F40A3.6 [Caenorhabditis elegans]	30245.2	17	30	0.682	KNLYSSISSYRPPLSSYK	97.4	2090.09
N2 Neg Ctrl IP	Protein F40A3.6 [Caenorhabditis elegans]	30245.2	17	30	0.682	MPLESLYAELGLK	70.4	1463.78
N2 Neg Ctrl IP	Protein F40A3.6 [Caenorhabditis elegans]	30245.2	17	30	0.682	MPLESLYAELGLKNPAASNYR	64.2	2337.19
N2 Neg Ctrl IP	Protein F40A3.6 [Caenorhabditis elegans]	30245.2	17	30	0.682	NIFHPTNR	25	998.517
N2 Neg Ctrl IP	Protein F40A3.6 [Caenorhabditis elegans]	30245.2	17	30	0.682	NLYSSISSYRPPLSSYK	33.7	1962
N2 Neg Ctrl IP	Protein F40A3.6 [Caenorhabditis elegans]	30245.2	17	30	0.682	SFQVYEPK	34.2	997.499
N2 Neg Ctrl IP	Protein F40A3.6 [Caenorhabditis elegans]	30245.2	17	30	0.682	SSSEYFAASYEAER	53	1596.68
N2 Neg Ctrl IP	Protein F40A3.6 [Caenorhabditis elegans]	30245.2	17	30	0.682	SSSEYFAASYEAERER	43.4	1881.82
N2 Neg Ctrl IP	Protein F40A3.6 [Caenorhabditis elegans]	30245.2	17	30	0.682	SYESYVK	32.3	875.414
N2 Neg Ctrl IP	Protein F40A3.6 [Caenorhabditis elegans]	30245.2	17	30	0.682	TLIDYKDFDSSPLSPYLYQSHPYVR	82.4	3004.47
N2 Neg Ctrl IP	Protein ANT-1.1, isoform a [Caenorhabditis elegans]	33046.6	9	9	0.237	AIFLEGLDK	40.9	1005.56
N2 Neg Ctrl IP	Protein ANT-1.1, isoform a [Caenorhabditis elegans]	33046.6	9	9	0.237	EQGVAALWR	58.8	1029.55
N2 Neg Ctrl IP	Protein ANT-1.1, isoform a [Caenorhabditis elegans]	33046.6	9	9	0.237	GIMDVLIR	45.3	916.529
N2 Neg Ctrl IP	Protein ANT-1.1, isoform a [Caenorhabditis elegans]	33046.6	9	9	0.237	GLADCLIK	29	889.481
N2 Neg Ctrl IP	Protein ANT-1.1, isoform a [Caenorhabditis elegans]	33046.6	9	9	0.237	IIQNEGMSAMFK	51.8	1368.67
N2 Neg Ctrl IP	Protein ANT-1.1, isoform a [Caenorhabditis elegans]	33046.6	9	9	0.237	KIIQNEGMSAMFK	56.8	1496.76
N2 Neg Ctrl IP	Protein ANT-1.1, isoform a [Caenorhabditis elegans]	33046.6	9	9	0.237	LAADIGK	33.5	687.404
N2 Neg Ctrl IP	Protein ANT-1.1, isoform a [Caenorhabditis elegans]	33046.6	9	9	0.237	MVFASDGQK	34.7	982.466
N2 Neg Ctrl IP	Protein ANT-1.1, isoform a [Caenorhabditis elegans]	33046.6	9	9	0.237	TAVAPIER	36.3	856.489
N2 Neg Ctrl IP	Protein ACT-5 [Caenorhabditis elegans]	41873.7	15	22	0.795	AGFAGDDAPR	68.5	976.448
N2 Neg Ctrl IP	Protein ACT-5 [Caenorhabditis elegans]	41873.7	15	22	0.795	AGFAGDDAPRAVFPSIVGRPR	26.8	2156.14
N2 Neg Ctrl IP	Protein ACT-5 [Caenorhabditis elegans]	41873.7	15	22	0.795	AVFPSIVGRPR	74.4	1198.71
N2 Neg Ctrl IP	Protein ACT-5 [Caenorhabditis elegans]	41873.7	15	22	0.795	CPEVLFQPAFIGMEGAGIHETTYQSIMK	73.9	3154.51
N2 Neg Ctrl IP	Protein ACT-5 [Caenorhabditis elegans]	41873.7	15	22	0.795	DLTDYMMK	42.2	1016.44
N2 Neg Ctrl IP	Protein ACT-5 [Caenorhabditis elegans]	41873.7	15	22	0.795	DLYANTVLSGGTSMFPGIADR	74.3	2186.04
N2 Neg Ctrl IP	Protein ACT-5 [Caenorhabditis elegans]	41873.7	15	22	0.795	DSYVGDEAQSK	63.9	1198.52
N2 Neg Ctrl IP	Protein ACT-5 [Caenorhabditis elegans]	41873.7	15	22	0.795	DSYVGDEAQSKR	61.3	1354.62
N2 Neg Ctrl IP	Protein ACT-5 [Caenorhabditis elegans]	41873.7	15	22	0.795	EEEIAALVVDNGSGMCK	60.6	1822.82
N2 Neg Ctrl IP	Protein ACT-5 [Caenorhabditis elegans]	41873.7	15	22	0.795	EIQHLAPSTMK	50.5	1254.65
N2 Neg Ctrl IP	Protein ACT-5 [Caenorhabditis elegans]	41873.7	15	22	0.795	GYTFTTTAER	56.6	1146.54
N2 Neg Ctrl IP	Protein ACT-5 [Caenorhabditis elegans]	41873.7	15	22	0.795	GYTFTTTAEREIVR	37.4	1643.84
N2 Neg Ctrl IP	Protein ACT-5 [Caenorhabditis elegans]	41873.7	15	22	0.795	HQGVMVGMGQK	67	1187.57
N2 Neg Ctrl IP	Protein ACT-5 [Caenorhabditis elegans]	41873.7	15	22	0.795	HQGVMVGMGQKDSYVGDEAQSK	59.6	2351.08
N2 Neg Ctrl IP	Protein ACT-5 [Caenorhabditis elegans]	41873.7	15	22	0.795	IAPEEHPVLLTEAPLNPK	46.8	1968.08
N2 Neg Ctrl IP	Protein ACT-5 [Caenorhabditis elegans]	41873.7	15	22	0.795	IIAPPERK	33.6	923.567
N2 Neg Ctrl IP	Protein ACT-5 [Caenorhabditis elegans]	41873.7	15	22	0.795	IKIIAPPER	37.6	1036.65
N2 Neg Ctrl IP	Protein ACT-5 [Caenorhabditis elegans]	41873.7	15	22	0.795	IWHHTFYNELR	57.4	1516.73
N2 Neg Ctrl IP	Protein ACT-5 [Caenorhabditis elegans]	41873.7	15	22	0.795	KDLYANTVLSGGTSMFPGIADR	22.7	2329.15
N2 Neg Ctrl IP	Protein ACT-5 [Caenorhabditis elegans]	41873.7	15	22	0.795	KYSVWIGGSILASLSTFQQMWISK	52.5	2730.43
N2 Neg Ctrl IP	Protein ACT-5 [Caenorhabditis elegans]	41873.7	15	22	0.795	LCYVAHDFESELAAAASSSSLEK	53	2485.16
N2 Neg Ctrl IP	Protein ACT-5 [Caenorhabditis elegans]	41873.7	15	22	0.795	LCYVAHDFESELAAAASSSSLEKSYELPDGQVITIGNER	39.5	4257.03
N2 Neg Ctrl IP	Protein ACT-5 [Caenorhabditis elegans]	41873.7	15	22	0.795	LDLAGRDLTDYMMK	43.5	1641.8
N2 Neg Ctrl IP	Protein ACT-5 [Caenorhabditis elegans]	41873.7	15	22	0.795	MQKEIQHLAPSTMK	26.2	1641.85
N2 Neg Ctrl IP	Protein ACT-5 [Caenorhabditis elegans]	41873.7	15	22	0.795	QEYDESGPSIVHR	62.8	1516.7
N2 Neg Ctrl IP	Protein ACT-5 [Caenorhabditis elegans]	41873.7	15	22	0.795	QEYDESGPSIVHRK	56.6	1644.8
N2 Neg Ctrl IP	Protein ACT-5 [Caenorhabditis elegans]	41873.7	15	22	0.795	SYELPDGQVITIGNER	77.4	1790.89
N2 Neg Ctrl IP	Protein ACT-5 [Caenorhabditis elegans]	41873.7	15	22	0.795	TTGIVLDTGDGVTHTVPIYEGYALPHAIQR	93.7	3194.65
N2 Neg Ctrl IP	Protein ACT-5 [Caenorhabditis elegans]	41873.7	15	22	0.795	YSVWIGGSILASLSTFQQMWISKQEYDESGPSIVHR	72.3	4116.02
N2 Neg Ctrl IP	Protein BEN-1 [Caenorhabditis elegans]	49446.5	1	1	0.0721	EAEGCDCLQGFQLTHSLGGGTGSGMGTLLISK	71.3	3281.52
N2 Neg Ctrl IP	Protein HSP-1 [Caenorhabditis elegans]	69725.1	7	8	0.141	IINEPTAAAIAYGLDKK	77.8	1787.99
N2 Neg Ctrl IP	Protein HSP-1 [Caenorhabditis elegans]	69725.1	7	8	0.141	LLSDLFSGKELNK	26.2	1463.81
N2 Neg Ctrl IP	Protein HSP-1 [Caenorhabditis elegans]	69725.1	7	8	0.141	MVNHFCAEFK	33.4	1282.57
N2 Neg Ctrl IP	Protein HSP-1 [Caenorhabditis elegans]	69725.1	7	8	0.141	NQVAMNPHNTVFDAKR	22.1	1841.91
N2 Neg Ctrl IP	Protein HSP-1 [Caenorhabditis elegans]	69725.1	7	8	0.141	STAGDTHLGGEDFDNR	23.6	1691.73
N2 Neg Ctrl IP	Protein HSP-1 [Caenorhabditis elegans]	69725.1	7	8	0.141	STMDPVEK	26.9	906.424
N2 Neg Ctrl IP	Protein HSP-1 [Caenorhabditis elegans]	69725.1	7	8	0.141	VQVEYKGENK	45.1	1193.62
N2 Neg Ctrl IP	Protein TKT-1 [Caenorhabditis elegans]	66012	2	2	0.0372	KIDSDIEGHPTPR	46.8	1464.74
N2 Neg Ctrl IP	Protein TKT-1 [Caenorhabditis elegans]	66012	2	2	0.0372	MAAVSFANLK	57.2	1051.56
N2 Neg Ctrl IP	Protein H28O16.1, isoform a [Caenorhabditis elegans]	55021.3	2	2	0.0409	AVDSLVPIGR	51.8	1026.59
N2 Neg Ctrl IP	Protein H28O16.1, isoform a [Caenorhabditis elegans]	55021.3	2	2	0.0409	LSVREPMVTGVK	36.4	1315.74
N2 Neg Ctrl IP	Protein MIG-6, isoform a [Caenorhabditis elegans]	237592	8	9	0.0841	CELVCKPESGNFYYK	33.3	1893.85
N2 Neg Ctrl IP	Protein MIG-6, isoform a [Caenorhabditis elegans]	237592	8	9	0.0841	DACHLNVDQGR	39	1284.58
N2 Neg Ctrl IP	Protein MIG-6, isoform a [Caenorhabditis elegans]	237592	8	9	0.0841	GANLEGCGEPSCAASLYGCCK	99.6	2260.91
N2 Neg Ctrl IP	Protein MIG-6, isoform a [Caenorhabditis elegans]	237592	8	9	0.0841	GSHNEGCGCEFAQYGCCPDGK	46.5	2389.87
N2 Neg Ctrl IP	Protein MIG-6, isoform a [Caenorhabditis elegans]	237592	8	9	0.0841	NLYCIDGK	36.9	982.466
N2 Neg Ctrl IP	Protein MIG-6, isoform a [Caenorhabditis elegans]	237592	8	9	0.0841	SNDICVDGECLPVGCDGK	38.2	1994.83
N2 Neg Ctrl IP	Protein MIG-6, isoform a [Caenorhabditis elegans]	237592	8	9	0.0841	YGCCPDGETTALGPR	99.9	1653.7
N2 Neg Ctrl IP	Protein MIG-6, isoform a [Caenorhabditis elegans]	237592	8	9	0.0841	YISCNLNACESGTDFRAEQCSK	47.9	2610.1
N2 Neg Ctrl IP	Protein UNC-87, isoform b [Caenorhabditis elegans]	41576.2	41	84	0.914	ETTKMVDSNHPDYSHECSIDQTTIPSQMGSNQYASQK	36.4	4216.8
N2 Neg Ctrl IP	Protein UNC-87, isoform b [Caenorhabditis elegans]	41576.2	41	84	0.914	FASQAGMIGFGTCR	89.1	1502.69
N2 Neg Ctrl IP	Protein UNC-87, isoform b [Caenorhabditis elegans]	41576.2	41	84	0.914	FASQKGMTGFGTAR	31.9	1474.71
N2 Neg Ctrl IP	Protein UNC-87, isoform b [Caenorhabditis elegans]	41576.2	41	84	0.914	GMTGFGQPR	61.9	950.451
N2 Neg Ctrl IP	Protein UNC-87, isoform b [Caenorhabditis elegans]	41576.2	41	84	0.914	GMTGFGSGR	53.7	869.394
N2 Neg Ctrl IP	Protein UNC-87, isoform b [Caenorhabditis elegans]	41576.2	41	84	0.914	GMTGFGSGRDVCR	21.4	1399.62
N2 Neg Ctrl IP	Protein UNC-87, isoform b [Caenorhabditis elegans]	41576.2	41	84	0.914	GMTGFGTAR	46	897.425
N2 Neg Ctrl IP	Protein UNC-87, isoform b [Caenorhabditis elegans]	41576.2	41	84	0.914	GMTGFGTARR	29.4	1053.53
N2 Neg Ctrl IP	Protein UNC-87, isoform b [Caenorhabditis elegans]	41576.2	41	84	0.914	GMTGFGTGR	41.3	883.409
N2 Neg Ctrl IP	Protein UNC-87, isoform b [Caenorhabditis elegans]	41576.2	41	84	0.914	GMTGFGTGRR	33.6	1039.51
N2 Neg Ctrl IP	Protein UNC-87, isoform b [Caenorhabditis elegans]	41576.2	41	84	0.914	IRMSEGIVR	30.4	1060.59
N2 Neg Ctrl IP	Protein UNC-87, isoform b [Caenorhabditis elegans]	41576.2	41	84	0.914	IWELEYPEEAEISLDR	80.9	1991.96
N2 Neg Ctrl IP	Protein UNC-87, isoform b [Caenorhabditis elegans]	41576.2	41	84	0.914	IWELEYPEEAEISLDRL	82.1	2105.04
N2 Neg Ctrl IP	Protein UNC-87, isoform b [Caenorhabditis elegans]	41576.2	41	84	0.914	KMTSFGAPR	60.7	994.514
N2 Neg Ctrl IP	Protein UNC-87, isoform b [Caenorhabditis elegans]	41576.2	41	84	0.914	LMTNFGTPR	57	1052.52
N2 Neg Ctrl IP	Protein UNC-87, isoform b [Caenorhabditis elegans]	41576.2	41	84	0.914	LQAGTNKYDSQK	67.5	1352.68
N2 Neg Ctrl IP	Protein UNC-87, isoform b [Caenorhabditis elegans]	41576.2	41	84	0.914	LQSGTNKYCSQR	80.5	1441.69
N2 Neg Ctrl IP	Protein UNC-87, isoform b [Caenorhabditis elegans]	41576.2	41	84	0.914	LQSGTNR	36.5	775.406
N2 Neg Ctrl IP	Protein UNC-87, isoform b [Caenorhabditis elegans]	41576.2	41	84	0.914	LQSGTNRFASQAGMIGFGTCR	71.1	2259.08
N2 Neg Ctrl IP	Protein UNC-87, isoform b [Caenorhabditis elegans]	41576.2	41	84	0.914	MPPTEDQVVAEEQPNATMETK	68.1	2345.06
N2 Neg Ctrl IP	Protein UNC-87, isoform b [Caenorhabditis elegans]	41576.2	41	84	0.914	MSEGIVR	39.5	791.408
N2 Neg Ctrl IP	Protein UNC-87, isoform b [Caenorhabditis elegans]	41576.2	41	84	0.914	MTSFGAPR	37.8	882.414
N2 Neg Ctrl IP	Protein UNC-87, isoform b [Caenorhabditis elegans]	41576.2	41	84	0.914	MVDSKHPEYDHEKPDQSEIPLQSGTNK	61	3109.45
N2 Neg Ctrl IP	Protein UNC-87, isoform b [Caenorhabditis elegans]	41576.2	41	84	0.914	MVDSNHPDYSHECSIDQTTIPSQMGSNQYASQK	79.6	3755.6
N2 Neg Ctrl IP	Protein UNC-87, isoform b [Caenorhabditis elegans]	41576.2	41	84	0.914	NTTFEAEGGELPYEAMK	91.2	1886.85
N2 Neg Ctrl IP	Protein UNC-87, isoform b [Caenorhabditis elegans]	41576.2	41	84	0.914	PPTEDQVVAEEQPNATMETK	73	2230.02
N2 Neg Ctrl IP	Protein UNC-87, isoform b [Caenorhabditis elegans]	41576.2	41	84	0.914	PPTEDQVVAEEQPNATMETKVTGQGQPK	98.2	3009.45
N2 Neg Ctrl IP	Protein UNC-87, isoform b [Caenorhabditis elegans]	41576.2	41	84	0.914	QTDGIIPSQAGWNK	59.3	1514.76
N2 Neg Ctrl IP	Protein UNC-87, isoform b [Caenorhabditis elegans]	41576.2	41	84	0.914	QTDGIIPSQAGWNKGDSQK	52.9	2029.99
N2 Neg Ctrl IP	Protein UNC-87, isoform b [Caenorhabditis elegans]	41576.2	41	84	0.914	SENLQEIPEDIANR	60.3	1627.79
N2 Neg Ctrl IP	Protein UNC-87, isoform b [Caenorhabditis elegans]	41576.2	41	84	0.914	SENLQEIPEDIANRTHGEVR	43.2	2307.13
N2 Neg Ctrl IP	Protein UNC-87, isoform b [Caenorhabditis elegans]	41576.2	41	84	0.914	VAQNPADLAELPEEK	55.8	1623.82
N2 Neg Ctrl IP	Protein UNC-87, isoform b [Caenorhabditis elegans]	41576.2	41	84	0.914	VAQNPADLAELPEEKIR	82	1893.01
N2 Neg Ctrl IP	Protein UNC-87, isoform b [Caenorhabditis elegans]	41576.2	41	84	0.914	VKSENLQEIPEDIANR	73.2	1854.96
N2 Neg Ctrl IP	Protein UNC-87, isoform b [Caenorhabditis elegans]	41576.2	41	84	0.914	VSETIIPSQAGWNK	52.8	1529.8
N2 Neg Ctrl IP	Protein UNC-87, isoform b [Caenorhabditis elegans]	41576.2	41	84	0.914	VSETIIPSQAGWNKGDSQK	57.5	2045.03
N2 Neg Ctrl IP	Protein UNC-87, isoform b [Caenorhabditis elegans]	41576.2	41	84	0.914	VTGQGQPK	32.8	814.442
N2 Neg Ctrl IP	Protein UNC-87, isoform b [Caenorhabditis elegans]	41576.2	41	84	0.914	WEVLDPSISWQNR	84.6	1629.8
N2 Neg Ctrl IP	Protein UNC-87, isoform b [Caenorhabditis elegans]	41576.2	41	84	0.914	WEVLDPSISWQNRK	54.8	1757.9
N2 Neg Ctrl IP	Protein UNC-87, isoform b [Caenorhabditis elegans]	41576.2	41	84	0.914	WTLAQLR	33.3	887.51
N2 Neg Ctrl IP	Protein UNC-87, isoform b [Caenorhabditis elegans]	41576.2	41	84	0.914	YDSQKGMTGFGTGR	52.2	1504.69
N2 Neg Ctrl IP	Protein RPS-2 [Caenorhabditis elegans]	28960.9	2	2	0.0772	GGEKETEWTPVTK	31.2	1461.72
N2 Neg Ctrl IP	Protein RPS-2 [Caenorhabditis elegans]	28960.9	2	2	0.0772	LAVVPVRR	27.3	909.599
N2 Neg Ctrl IP	Protein HPO-34, isoform a [Caenorhabditis elegans]	85641.1	10	10	0.157	ATSVSVHSSVSQK	39.3	1316.68
N2 Neg Ctrl IP	Protein HPO-34, isoform a [Caenorhabditis elegans]	85641.1	10	10	0.157	GIQINDAPRK	41.6	1111.62
N2 Neg Ctrl IP	Protein HPO-34, isoform a [Caenorhabditis elegans]	85641.1	10	10	0.157	KNTLVSVGK	58.8	945.573
N2 Neg Ctrl IP	Protein HPO-34, isoform a [Caenorhabditis elegans]	85641.1	10	10	0.157	RPTVDTEDQRSEVSAMSK	26.6	2035.97
N2 Neg Ctrl IP	Protein HPO-34, isoform a [Caenorhabditis elegans]	85641.1	10	10	0.157	SGSEGVSSLR	58.1	978.485
N2 Neg Ctrl IP	Protein HPO-34, isoform a [Caenorhabditis elegans]	85641.1	10	10	0.157	SPISHETFQPHDECNSVK	35.8	2111.95
N2 Neg Ctrl IP	Protein HPO-34, isoform a [Caenorhabditis elegans]	85641.1	10	10	0.157	STTVVLEDVR	68.6	1118.61
N2 Neg Ctrl IP	Protein HPO-34, isoform a [Caenorhabditis elegans]	85641.1	10	10	0.157	STTVVLEDVRSGSEGVSSLR	57.4	2078.07
N2 Neg Ctrl IP	Protein HPO-34, isoform a [Caenorhabditis elegans]	85641.1	10	10	0.157	VNPTVQQHVIYNPYGDHQSVR	51.5	2451.22
N2 Neg Ctrl IP	Protein HPO-34, isoform a [Caenorhabditis elegans]	85641.1	10	10	0.157	VSEHVQLGGSRK	26.6	1296.7
N2 Neg Ctrl IP	Protein RPL-28 [Caenorhabditis elegans]	13725.1	2	2	0.151	GVVVSTKNEK	22.3	1060.6
N2 Neg Ctrl IP	Protein RPL-28 [Caenorhabditis elegans]	13725.1	2	2	0.151	NAGFNKFNK	41.5	1039.53
N2 Neg Ctrl IP	Protein FLU-2 [Caenorhabditis elegans]	54050.3	6	6	0.188	ISNPPIHTVAAMLGSLK	51.4	1748.97
N2 Neg Ctrl IP	Protein FLU-2 [Caenorhabditis elegans]	54050.3	6	6	0.188	LSISIITPEEFHQR	32.8	1669.89
N2 Neg Ctrl IP	Protein FLU-2 [Caenorhabditis elegans]	54050.3	6	6	0.188	MGVFGHMSGEVPWAHCDEYCLEGVGR	23	2980.26
N2 Neg Ctrl IP	Protein FLU-2 [Caenorhabditis elegans]	54050.3	6	6	0.188	TLFGENSEQR	48.8	1180.56
N2 Neg Ctrl IP	Protein FLU-2 [Caenorhabditis elegans]	54050.3	6	6	0.188	TVQDSMVCLEPR	61.2	1434.67
N2 Neg Ctrl IP	Protein FLU-2 [Caenorhabditis elegans]	54050.3	6	6	0.188	VFDQVSLENLR	72.8	1319.7
N2 Neg Ctrl IP	Protein SPC-1, isoform a [Caenorhabditis elegans]	282305	2	2	0.00989	ADSFNQTASAGQK	58.4	1324.61
N2 Neg Ctrl IP	Protein SPC-1, isoform a [Caenorhabditis elegans]	282305	2	2	0.00989	QGFVPAAYVKR	3.44	1236.67
N2 Neg Ctrl IP	Protein RPL-23 [Caenorhabditis elegans]	14954.8	1	1	0.0714	GSAITGPVAK	36	900.515
N2 Neg Ctrl IP	Protein IFB-1, isoform b [Caenorhabditis elegans]	67150	9	10	0.197	EIVYSIPANVVIKPGK	50.8	1727.01
N2 Neg Ctrl IP	Protein IFB-1, isoform b [Caenorhabditis elegans]	67150	9	10	0.197	HRDDLAEYR	27.4	1174.56
N2 Neg Ctrl IP	Protein IFB-1, isoform b [Caenorhabditis elegans]	67150	9	10	0.197	LVADLDELRGK	25.2	1228.69
N2 Neg Ctrl IP	Protein IFB-1, isoform b [Caenorhabditis elegans]	67150	9	10	0.197	MVTEMGSATVGGISPALSANAAK	84	2163.08
N2 Neg Ctrl IP	Protein IFB-1, isoform b [Caenorhabditis elegans]	67150	9	10	0.197	NLTIYAR	27.9	850.478
N2 Neg Ctrl IP	Protein IFB-1, isoform b [Caenorhabditis elegans]	67150	9	10	0.197	QSGNYVSGGNGAGSGGR	74	1525.66
N2 Neg Ctrl IP	Protein IFB-1, isoform b [Caenorhabditis elegans]	67150	9	10	0.197	SRYEDIQQR	39.2	1194.59
N2 Neg Ctrl IP	Protein IFB-1, isoform b [Caenorhabditis elegans]	67150	9	10	0.197	THSLQQQENTDSTR	43.2	1644.76
N2 Neg Ctrl IP	Protein IFB-1, isoform b [Caenorhabditis elegans]	67150	9	10	0.197	YSESLSTARK	36.5	1141.58
N2 Neg Ctrl IP	Protein PQN-22, isoform c [Caenorhabditis elegans]	115670	4	4	0.137	QYSSNATSNYPSQTQQYQQQQHQYQSDHSNAQR	35.9	3931.69
N2 Neg Ctrl IP	Protein PQN-22, isoform c [Caenorhabditis elegans]	115670	4	4	0.137	SYSSQTTTQHQPQPVAANNNYSTSYHTER	26	3297.48
N2 Neg Ctrl IP	Protein PQN-22, isoform c [Caenorhabditis elegans]	115670	4	4	0.137	TTSYNYSSSTIPSQPAKPSFNQESYTTHTER	25.1	3509.61
N2 Neg Ctrl IP	Protein PQN-22, isoform c [Caenorhabditis elegans]	115670	4	4	0.137	VTGGGTGAPVSNNYSNQNYSSSAYNSQSSQHQTK	140	3521.54
N2 Neg Ctrl IP	Protein IDH-1, isoform b [Caenorhabditis elegans]	48526.5	3	3	0.0897	IQGGDIVEMQGDEMTR	92.7	1778.81
N2 Neg Ctrl IP	Protein IDH-1, isoform b [Caenorhabditis elegans]	48526.5	3	3	0.0897	SDGGFVWACK	25.8	1126.5
N2 Neg Ctrl IP	Protein IDH-1, isoform b [Caenorhabditis elegans]	48526.5	3	3	0.0897	TVEAEAAHGTVTR	64.4	1341.68
N2 Neg Ctrl IP	Protein RPS-8, isoform a [Caenorhabditis elegans]	23751.3	1	1	0.0721	IVDTMYNATNNELVR	93.1	1752.86
N2 Neg Ctrl IP	Protein Y38F1A.6 [Caenorhabditis elegans]	50507.6	2	2	0.0839	GMGFEFSDIEMLTEAASHSVPNIAISPK	46.3	2978.43
N2 Neg Ctrl IP	Protein Y38F1A.6 [Caenorhabditis elegans]	50507.6	2	2	0.0839	SCVADDYPKEK	40	1311.59
N2 Neg Ctrl IP	Protein MYO-5 [Caenorhabditis elegans]	227004	6	6	0.0598	AAATETFR	35.8	866.437
N2 Neg Ctrl IP	Protein MYO-5 [Caenorhabditis elegans]	227004	6	6	0.0598	AQIEVSQIR	35.3	1043.58
N2 Neg Ctrl IP	Protein MYO-5 [Caenorhabditis elegans]	227004	6	6	0.0598	ASDLTLASK	46	905.494
N2 Neg Ctrl IP	Protein MYO-5 [Caenorhabditis elegans]	227004	6	6	0.0598	ELQYQVEEEQR	52.9	1450.68
N2 Neg Ctrl IP	Protein MYO-5 [Caenorhabditis elegans]	227004	6	6	0.0598	ENQSMLITGESGAGKTENTK	3.17	2111.98
N2 Neg Ctrl IP	Protein MYO-5 [Caenorhabditis elegans]	227004	6	6	0.0598	LQEKEEEFENTR	66.6	1551.73
N2 Neg Ctrl IP	Protein MYO-5 [Caenorhabditis elegans]	227004	6	6	0.0598	QIEDAESLASGNLAK	45.9	1545.78
N2 Neg Ctrl IP	Protein MYO-5 [Caenorhabditis elegans]	227004	6	6	0.0598	TEDMANLTFLNDASVLHNLR	39.2	2276.09
N2 Neg Ctrl IP	Protein MYO-5 [Caenorhabditis elegans]	227004	6	6	0.0598	VQEMQEQLENANQK	98.7	1688.79
N2 Neg Ctrl IP	Protein TAG-18 [Caenorhabditis elegans]	24429.4	1	1	0.0448	FGNVGTLTR	56.7	964.521
N2 Neg Ctrl IP	Protein IFF-1, isoform b [Caenorhabditis elegans]	17867.3	2	2	0.161	IVEMSTSK	30.3	894.46
N2 Neg Ctrl IP	Protein IFF-1, isoform b [Caenorhabditis elegans]	17867.3	2	2	0.161	KLEDICPSTHNMDVPVVK	52.3	2082.04
N2 Neg Ctrl IP	Protein F46G10.1, isoform a [Caenorhabditis elegans]	20368.7	22	38	0.978	ANTNDIVDIR	81.1	1130.58
N2 Neg Ctrl IP	Protein F46G10.1, isoform a [Caenorhabditis elegans]	20368.7	22	38	0.978	ANTNDIVDIRNSVNQIANNTYYNNGGR	79.9	3010.44
N2 Neg Ctrl IP	Protein F46G10.1, isoform a [Caenorhabditis elegans]	20368.7	22	38	0.978	ASLHSNGVDMHTAEYADYK	45.2	2109.92
N2 Neg Ctrl IP	Protein F46G10.1, isoform a [Caenorhabditis elegans]	20368.7	22	38	0.978	ASLHSNGVDMHTAEYADYKK	54.5	2237.03
N2 Neg Ctrl IP	Protein F46G10.1, isoform a [Caenorhabditis elegans]	20368.7	22	38	0.978	DESGAIFVNR	56.8	1107.54
N2 Neg Ctrl IP	Protein F46G10.1, isoform a [Caenorhabditis elegans]	20368.7	22	38	0.978	DESGAIFVNRDGR	31.9	1435.69
N2 Neg Ctrl IP	Protein F46G10.1, isoform a [Caenorhabditis elegans]	20368.7	22	38	0.978	DGKNTVLPK	57	971.552
N2 Neg Ctrl IP	Protein F46G10.1, isoform a [Caenorhabditis elegans]	20368.7	22	38	0.978	DGRLFAFVLQFMR	32	1599.85
N2 Neg Ctrl IP	Protein F46G10.1, isoform a [Caenorhabditis elegans]	20368.7	22	38	0.978	DIVHINAGGTR	49.9	1152.61
N2 Neg Ctrl IP	Protein F46G10.1, isoform a [Caenorhabditis elegans]	20368.7	22	38	0.978	DIVHINAGGTRFTTLYDTLAQSK	42.7	2521.3
N2 Neg Ctrl IP	Protein F46G10.1, isoform a [Caenorhabditis elegans]	20368.7	22	38	0.978	DKDVLAQLK	52.8	1029.59
N2 Neg Ctrl IP	Protein F46G10.1, isoform a [Caenorhabditis elegans]	20368.7	22	38	0.978	EADFFGMEVFK	51.2	1319.6
N2 Neg Ctrl IP	Protein F46G10.1, isoform a [Caenorhabditis elegans]	20368.7	22	38	0.978	FTTLYDTLAQSK	77	1387.71
N2 Neg Ctrl IP	Protein F46G10.1, isoform a [Caenorhabditis elegans]	20368.7	22	38	0.978	KAEVTSHHAR	37.7	1135.6
N2 Neg Ctrl IP	Protein F46G10.1, isoform a [Caenorhabditis elegans]	20368.7	22	38	0.978	LFAFVLQFMR	68.7	1271.7
N2 Neg Ctrl IP	Protein F46G10.1, isoform a [Caenorhabditis elegans]	20368.7	22	38	0.978	NSVNQIANNTYYNNGGR	101	1900.84
N2 Neg Ctrl IP	Protein F46G10.1, isoform a [Caenorhabditis elegans]	20368.7	22	38	0.978	NSVNQIANNTYYNNGGRI	87.5	2011.96
N2 Neg Ctrl IP	Protein F46G10.1, isoform a [Caenorhabditis elegans]	20368.7	22	38	0.978	READFFGMEVFK	48.2	1475.7
N2 Neg Ctrl IP	Protein F46G10.1, isoform a [Caenorhabditis elegans]	20368.7	22	38	0.978	SSYFLNFIRIDR	33.4	1530.81
N2 Neg Ctrl IP	Protein F46G10.1, isoform a [Caenorhabditis elegans]	20368.7	22	38	0.978	TIRDESGAIFVNR	44.4	1477.78
N2 Neg Ctrl IP	Protein F46G10.1, isoform a [Caenorhabditis elegans]	20368.7	22	38	0.978	TSGKIVLLQQR	32.2	1242.75
N2 Neg Ctrl IP	Protein F46G10.1, isoform a [Caenorhabditis elegans]	20368.7	22	38	0.978	YLIQETLVDIEKEQR	87.7	1877
N2 Neg Ctrl IP	Protein T25F10.6, isoform a [Caenorhabditis elegans]	44367.9	40	82	0.803	AAAPPASLK	32.5	825.483
N2 Neg Ctrl IP	Protein T25F10.6, isoform a [Caenorhabditis elegans]	44367.9	40	82	0.803	AAAPPASLKSPTPGR	82.9	1420.79
N2 Neg Ctrl IP	Protein T25F10.6, isoform a [Caenorhabditis elegans]	44367.9	40	82	0.803	ARASDGIVPLQSGTNK	58.9	1613.86
N2 Neg Ctrl IP	Protein T25F10.6, isoform a [Caenorhabditis elegans]	44367.9	40	82	0.803	ASDGIVPLQSGTNK	55.8	1386.72
N2 Neg Ctrl IP	Protein T25F10.6, isoform a [Caenorhabditis elegans]	44367.9	40	82	0.803	ASDGIVPLQSGTNKLASQAGMTGIGMPR	55.1	2773.4
N2 Neg Ctrl IP	Protein T25F10.6, isoform a [Caenorhabditis elegans]	44367.9	40	82	0.803	DVIDKVK	28.8	816.483
N2 Neg Ctrl IP	Protein T25F10.6, isoform a [Caenorhabditis elegans]	44367.9	40	82	0.803	EADHANQTGMTAFGTPR	79	1803.81
N2 Neg Ctrl IP	Protein T25F10.6, isoform a [Caenorhabditis elegans]	44367.9	40	82	0.803	EGASQAGMTGFGAFR	77.7	1486.67
N2 Neg Ctrl IP	Protein T25F10.6, isoform a [Caenorhabditis elegans]	44367.9	40	82	0.803	EGASQAGMTGFGAFRNNTVAFMQAQDQR	90.5	2990.36
N2 Neg Ctrl IP	Protein T25F10.6, isoform a [Caenorhabditis elegans]	44367.9	40	82	0.803	FANQAGMTGFGMPR	90.3	1484.68
N2 Neg Ctrl IP	Protein T25F10.6, isoform a [Caenorhabditis elegans]	44367.9	40	82	0.803	FASQKGQSGFGAVR	65.8	1439.74
N2 Neg Ctrl IP	Protein T25F10.6, isoform a [Caenorhabditis elegans]	44367.9	40	82	0.803	GDMPHDEGTLSR	47	1314.57
N2 Neg Ctrl IP	Protein T25F10.6, isoform a [Caenorhabditis elegans]	44367.9	40	82	0.803	GMTGFGVPR	46.5	937.456
N2 Neg Ctrl IP	Protein T25F10.6, isoform a [Caenorhabditis elegans]	44367.9	40	82	0.803	GMTGFGVPRDVIDK	51.5	1491.76
N2 Neg Ctrl IP	Protein T25F10.6, isoform a [Caenorhabditis elegans]	44367.9	40	82	0.803	GQSGFGAVR	40.6	878.448
N2 Neg Ctrl IP	Protein T25F10.6, isoform a [Caenorhabditis elegans]	44367.9	40	82	0.803	GQSGFGAVRDVNYK	70.6	1497.74
N2 Neg Ctrl IP	Protein T25F10.6, isoform a [Caenorhabditis elegans]	44367.9	40	82	0.803	GSTWLQSGTNK	61.3	1178.58
N2 Neg Ctrl IP	Protein T25F10.6, isoform a [Caenorhabditis elegans]	44367.9	40	82	0.803	GSTWLQSGTNKFASQK	37.9	1739.87
N2 Neg Ctrl IP	Protein T25F10.6, isoform a [Caenorhabditis elegans]	44367.9	40	82	0.803	GTGGASEVPEEK	74.3	1160.54
N2 Neg Ctrl IP	Protein T25F10.6, isoform a [Caenorhabditis elegans]	44367.9	40	82	0.803	GTGGASEVPEEKAR	67.7	1387.68
N2 Neg Ctrl IP	Protein T25F10.6, isoform a [Caenorhabditis elegans]	44367.9	40	82	0.803	IANLKGSTWLQSGTNK	47.8	1717.92
N2 Neg Ctrl IP	Protein T25F10.6, isoform a [Caenorhabditis elegans]	44367.9	40	82	0.803	KQQNYSSGKPSTIHTK	38.3	1803.93
N2 Neg Ctrl IP	Protein T25F10.6, isoform a [Caenorhabditis elegans]	44367.9	40	82	0.803	LASQAGMTGIGMPR	90.2	1389.7
N2 Neg Ctrl IP	Protein T25F10.6, isoform a [Caenorhabditis elegans]	44367.9	40	82	0.803	NNTVAFMQAQDQR	86.2	1538.7
N2 Neg Ctrl IP	Protein T25F10.6, isoform a [Caenorhabditis elegans]	44367.9	40	82	0.803	QQNYSSGKPSTIHTK	55.5	1675.84
N2 Neg Ctrl IP	Protein T25F10.6, isoform a [Caenorhabditis elegans]	44367.9	40	82	0.803	QQVNFTPSIPQSVLR	34.8	1715.9
N2 Neg Ctrl IP	Protein T25F10.6, isoform a [Caenorhabditis elegans]	44367.9	40	82	0.803	QQVNFTPSIPQSVLRK	48.7	1842.02
N2 Neg Ctrl IP	Protein T25F10.6, isoform a [Caenorhabditis elegans]	44367.9	40	82	0.803	QTSGWKEGASQAGMTGFGAFR	82.1	2174.01
N2 Neg Ctrl IP	Protein T25F10.6, isoform a [Caenorhabditis elegans]	44367.9	40	82	0.803	QVYTPFTDDTHEDLPADIAR	43.5	2304.08
N2 Neg Ctrl IP	Protein T25F10.6, isoform a [Caenorhabditis elegans]	44367.9	40	82	0.803	RPDVPFWTGQK	56.9	1330.69
N2 Neg Ctrl IP	Protein T25F10.6, isoform a [Caenorhabditis elegans]	44367.9	40	82	0.803	RPDVPFWTGQKEADHANQTGMTAFGTPR	74.6	3115.48
N2 Neg Ctrl IP	Protein T25F10.6, isoform a [Caenorhabditis elegans]	44367.9	40	82	0.803	SDNLAEITDEK	65.5	1234.58
N2 Neg Ctrl IP	Protein T25F10.6, isoform a [Caenorhabditis elegans]	44367.9	40	82	0.803	SDNLAEITDEKK	61.8	1362.67
N2 Neg Ctrl IP	Protein T25F10.6, isoform a [Caenorhabditis elegans]	44367.9	40	82	0.803	SEGIIPIQAGSNK	70.9	1313.71
N2 Neg Ctrl IP	Protein T25F10.6, isoform a [Caenorhabditis elegans]	44367.9	40	82	0.803	SEGIIPIQAGSNKYASQK	77.3	1890.99
N2 Neg Ctrl IP	Protein T25F10.6, isoform a [Caenorhabditis elegans]	44367.9	40	82	0.803	SQGMIPYQMGVNFLESQAGK	84.1	2185.04
N2 Neg Ctrl IP	Protein T25F10.6, isoform a [Caenorhabditis elegans]	44367.9	40	82	0.803	TGFGQPR	33.3	762.389
N2 Neg Ctrl IP	Protein T25F10.6, isoform a [Caenorhabditis elegans]	44367.9	40	82	0.803	TKGTGGASEVPEEK	66.9	1389.69
N2 Neg Ctrl IP	Protein T25F10.6, isoform a [Caenorhabditis elegans]	44367.9	40	82	0.803	TNDQDRDSQGFIHLQMGTNK	60	2305.06
N2 Neg Ctrl IP	Protein T25F10.6, isoform a [Caenorhabditis elegans]	44367.9	40	82	0.803	YASQKGMTGFGVPR	36.5	1514.74
N2 Neg Ctrl IP	Protein KIN-18, isoform a [Caenorhabditis elegans]	112873	2	2	0.0397	MNFSGKQAVEK	0.61	1255.6
N2 Neg Ctrl IP	Protein KIN-18, isoform a [Caenorhabditis elegans]	112873	2	2	0.0397	QQLSNLHQLEEQLDDEDVNVQERQMDTR	1.67	3414.52
N2 Neg Ctrl IP	Protein UNC-89, isoform a [Caenorhabditis elegans]	786768	5	5	0.00965	AIATNSIGTATSTSK	93.9	1422.74
N2 Neg Ctrl IP	Protein UNC-89, isoform a [Caenorhabditis elegans]	786768	5	5	0.00965	CVAENTYGSAR	48.8	1227.54
N2 Neg Ctrl IP	Protein UNC-89, isoform a [Caenorhabditis elegans]	786768	5	5	0.00965	HFDGMVTCQGSNR	23.8	1508.64
N2 Neg Ctrl IP	Protein UNC-89, isoform a [Caenorhabditis elegans]	786768	5	5	0.00965	STSSEIIAGSESR	76.7	1323.64
N2 Neg Ctrl IP	Protein UNC-89, isoform a [Caenorhabditis elegans]	786768	5	5	0.00965	VKIENLDDGTQR	37.2	1388.7
N2 Neg Ctrl IP	Protein NMY-1 [Caenorhabditis elegans]	229375	85	111	0.493	AAVADPATLAAWAQR	69.4	1511.8
N2 Neg Ctrl IP	Protein NMY-1 [Caenorhabditis elegans]	229375	85	111	0.493	ADMAQEIALLQASR	74.2	1516.78
N2 Neg Ctrl IP	Protein NMY-1 [Caenorhabditis elegans]	229375	85	111	0.493	AHLEKEIHAAR	36	1274.7
N2 Neg Ctrl IP	Protein NMY-1 [Caenorhabditis elegans]	229375	85	111	0.493	AIEQIQHTMEGKIEEQK	31.2	2012.01
N2 Neg Ctrl IP	Protein NMY-1 [Caenorhabditis elegans]	229375	85	111	0.493	AISNKDVEAEEK	45.4	1332.66
N2 Neg Ctrl IP	Protein NMY-1 [Caenorhabditis elegans]	229375	85	111	0.493	AKITELESGAQSR	71.4	1389.73
N2 Neg Ctrl IP	Protein NMY-1 [Caenorhabditis elegans]	229375	85	111	0.493	ANDKSFVEK	38.4	1037.53
N2 Neg Ctrl IP	Protein NMY-1 [Caenorhabditis elegans]	229375	85	111	0.493	AQMAALEAK	27.8	932.487
N2 Neg Ctrl IP	Protein NMY-1 [Caenorhabditis elegans]	229375	85	111	0.493	AQNQEQAEFAVEAIAK	121	1746.87
N2 Neg Ctrl IP	Protein NMY-1 [Caenorhabditis elegans]	229375	85	111	0.493	AQVQLEQITTDLSMER	124	1861.93
N2 Neg Ctrl IP	Protein NMY-1 [Caenorhabditis elegans]	229375	85	111	0.493	ARAQMAALEAK	48.6	1159.63
N2 Neg Ctrl IP	Protein NMY-1 [Caenorhabditis elegans]	229375	85	111	0.493	AVIQEQLQQESENSAELDDIRGR	124	2628.29
N2 Neg Ctrl IP	Protein NMY-1 [Caenorhabditis elegans]	229375	85	111	0.493	CIIPNHEKK	24.8	1138.6
N2 Neg Ctrl IP	Protein NMY-1 [Caenorhabditis elegans]	229375	85	111	0.493	CNGVLEGIR	58.6	1018.5
N2 Neg Ctrl IP	Protein NMY-1 [Caenorhabditis elegans]	229375	85	111	0.493	DLENELENEKR	49.9	1388.67
N2 Neg Ctrl IP	Protein NMY-1 [Caenorhabditis elegans]	229375	85	111	0.493	EDIAALLR	57.3	900.515
N2 Neg Ctrl IP	Protein NMY-1 [Caenorhabditis elegans]	229375	85	111	0.493	EKSEYLLEGVDNYR	81.3	1714.83
N2 Neg Ctrl IP	Protein NMY-1 [Caenorhabditis elegans]	229375	85	111	0.493	ETNDEVLVELVDTSR	66.6	1718.84
N2 Neg Ctrl IP	Protein NMY-1 [Caenorhabditis elegans]	229375	85	111	0.493	EVVAQLEK	38.3	915.515
N2 Neg Ctrl IP	Protein NMY-1 [Caenorhabditis elegans]	229375	85	111	0.493	EYQIECEEAR	38	1326.56
N2 Neg Ctrl IP	Protein NMY-1 [Caenorhabditis elegans]	229375	85	111	0.493	FIVPDMR	34.2	877.46
N2 Neg Ctrl IP	Protein NMY-1 [Caenorhabditis elegans]	229375	85	111	0.493	GFDVPGSSDNLAREEENESNVSGSEHGMSVN	73.6	3250.38
N2 Neg Ctrl IP	Protein NMY-1 [Caenorhabditis elegans]	229375	85	111	0.493	GITLPNVDDVQEFHSTINSMR	63.1	2375.12
N2 Neg Ctrl IP	Protein NMY-1 [Caenorhabditis elegans]	229375	85	111	0.493	HRYEILTPDVIPK	48.3	1580.88
N2 Neg Ctrl IP	Protein NMY-1 [Caenorhabditis elegans]	229375	85	111	0.493	IAQLEEELEEEQSNCELAIDK	82.1	2490.16
N2 Neg Ctrl IP	Protein NMY-1 [Caenorhabditis elegans]	229375	85	111	0.493	IAQLEEELEEEQSNCELAIDKQR	84.6	2775.3
N2 Neg Ctrl IP	Protein NMY-1 [Caenorhabditis elegans]	229375	85	111	0.493	IMGFADDEISSIMR	104	1584.74
N2 Neg Ctrl IP	Protein NMY-1 [Caenorhabditis elegans]	229375	85	111	0.493	INSNLVLEQLR	75.3	1298.74
N2 Neg Ctrl IP	Protein NMY-1 [Caenorhabditis elegans]	229375	85	111	0.493	IQQELEDSSMELENVR	72.1	1919.9
N2 Neg Ctrl IP	Protein NMY-1 [Caenorhabditis elegans]	229375	85	111	0.493	ITELESGAQSR	74.3	1190.6
N2 Neg Ctrl IP	Protein NMY-1 [Caenorhabditis elegans]	229375	85	111	0.493	KAQVQLEQITTDLSMER	93.6	1990.03
N2 Neg Ctrl IP	Protein NMY-1 [Caenorhabditis elegans]	229375	85	111	0.493	KFESQMAEER	60.8	1254.58
N2 Neg Ctrl IP	Protein NMY-1 [Caenorhabditis elegans]	229375	85	111	0.493	KIENQIGELEQQLEVANR	54.6	2111.11
N2 Neg Ctrl IP	Protein NMY-1 [Caenorhabditis elegans]	229375	85	111	0.493	KIQQELEDSSMELENVR	54	2048
N2 Neg Ctrl IP	Protein NMY-1 [Caenorhabditis elegans]	229375	85	111	0.493	KLPIYSEDLIEEFK	23.7	1723.92
N2 Neg Ctrl IP	Protein NMY-1 [Caenorhabditis elegans]	229375	85	111	0.493	KMITALDIDTNLYR	49.2	1666.88
N2 Neg Ctrl IP	Protein NMY-1 [Caenorhabditis elegans]	229375	85	111	0.493	LATAEGQIQELNEQIQEETR	97.8	2300.14
N2 Neg Ctrl IP	Protein NMY-1 [Caenorhabditis elegans]	229375	85	111	0.493	LDQVIVER	55.7	971.552
N2 Neg Ctrl IP	Protein NMY-1 [Caenorhabditis elegans]	229375	85	111	0.493	LEVTNQALKSESDR	44.8	1589.81
N2 Neg Ctrl IP	Protein NMY-1 [Caenorhabditis elegans]	229375	85	111	0.493	LLLDKTNVDQR	43.6	1314.74
N2 Neg Ctrl IP	Protein NMY-1 [Caenorhabditis elegans]	229375	85	111	0.493	LPIYSEDLIEEFK	78.6	1595.82
N2 Neg Ctrl IP	Protein NMY-1 [Caenorhabditis elegans]	229375	85	111	0.493	LPIYSEDLIEEFKGK	54.8	1780.94
N2 Neg Ctrl IP	Protein NMY-1 [Caenorhabditis elegans]	229375	85	111	0.493	LSEEEQQNEKNNDER	35.3	1861.82
N2 Neg Ctrl IP	Protein NMY-1 [Caenorhabditis elegans]	229375	85	111	0.493	LVELQDAYDKLLK	52.7	1547.87
N2 Neg Ctrl IP	Protein NMY-1 [Caenorhabditis elegans]	229375	85	111	0.493	MGKVEELNNQLMK	48.7	1533.78
N2 Neg Ctrl IP	Protein NMY-1 [Caenorhabditis elegans]	229375	85	111	0.493	MITALDIDTNLYR	64.6	1538.79
N2 Neg Ctrl IP	Protein NMY-1 [Caenorhabditis elegans]	229375	85	111	0.493	NFIDGKESVR	37.8	1164.6
N2 Neg Ctrl IP	Protein NMY-1 [Caenorhabditis elegans]	229375	85	111	0.493	NGLAYLK	36.3	779.43
N2 Neg Ctrl IP	Protein NMY-1 [Caenorhabditis elegans]	229375	85	111	0.493	NLRDVEHLQK	27.2	1251.68
N2 Neg Ctrl IP	Protein NMY-1 [Caenorhabditis elegans]	229375	85	111	0.493	NMDPLNENVVGLMQNSTDPFVAGIWK	65.1	2890.38
N2 Neg Ctrl IP	Protein NMY-1 [Caenorhabditis elegans]	229375	85	111	0.493	NMDPLNENVVGLMQNSTDPFVAGIWKDAEFAGICAAEMNETAFGMR	57.2	5064.25
N2 Neg Ctrl IP	Protein NMY-1 [Caenorhabditis elegans]	229375	85	111	0.493	NQQIIKEYQIECEEAR	61.6	2050.99
N2 Neg Ctrl IP	Protein NMY-1 [Caenorhabditis elegans]	229375	85	111	0.493	NTSPHFVR	47.5	957.49
N2 Neg Ctrl IP	Protein NMY-1 [Caenorhabditis elegans]	229375	85	111	0.493	NVQREADDLLDANEQLTR	115	2100.03
N2 Neg Ctrl IP	Protein NMY-1 [Caenorhabditis elegans]	229375	85	111	0.493	QAKEDIAALLR	31.1	1227.71
N2 Neg Ctrl IP	Protein NMY-1 [Caenorhabditis elegans]	229375	85	111	0.493	QLDEAEDEMSRER	41.3	1607.7
N2 Neg Ctrl IP	Protein NMY-1 [Caenorhabditis elegans]	229375	85	111	0.493	QLEESEVAKER	49.9	1317.66
N2 Neg Ctrl IP	Protein NMY-1 [Caenorhabditis elegans]	229375	85	111	0.493	QLELENDELEELRAK	32.6	1828.93
N2 Neg Ctrl IP	Protein NMY-1 [Caenorhabditis elegans]	229375	85	111	0.493	QMETVRDLEEQLEQEEQAR	61.5	2361.1
N2 Neg Ctrl IP	Protein NMY-1 [Caenorhabditis elegans]	229375	85	111	0.493	QQNQADQERADMAQEIALLQASR	46.4	2614.26
N2 Neg Ctrl IP	Protein NMY-1 [Caenorhabditis elegans]	229375	85	111	0.493	QVEELHDQIEQHK	26.8	1632.8
N2 Neg Ctrl IP	Protein NMY-1 [Caenorhabditis elegans]	229375	85	111	0.493	QVTISRDDVQK	50.5	1288.69
N2 Neg Ctrl IP	Protein NMY-1 [Caenorhabditis elegans]	229375	85	111	0.493	RDEELQHQLTR	34.7	1424.72
N2 Neg Ctrl IP	Protein NMY-1 [Caenorhabditis elegans]	229375	85	111	0.493	REVVAQLEK	35.3	1071.62
N2 Neg Ctrl IP	Protein NMY-1 [Caenorhabditis elegans]	229375	85	111	0.493	RLATAEGQIQELNEQIQEETR	78.2	2457.22
N2 Neg Ctrl IP	Protein NMY-1 [Caenorhabditis elegans]	229375	85	111	0.493	SDQAMLQDDRVIQK	60.4	1646.82
N2 Neg Ctrl IP	Protein NMY-1 [Caenorhabditis elegans]	229375	85	111	0.493	SEYLLEGVDNYR	60	1457.69
N2 Neg Ctrl IP	Protein NMY-1 [Caenorhabditis elegans]	229375	85	111	0.493	SFHIFYQILR	27.4	1323.72
N2 Neg Ctrl IP	Protein NMY-1 [Caenorhabditis elegans]	229375	85	111	0.493	SHFAVVHYAGR	32	1243.63
N2 Neg Ctrl IP	Protein NMY-1 [Caenorhabditis elegans]	229375	85	111	0.493	SKSHFAVVHYAGR	41.5	1458.76
N2 Neg Ctrl IP	Protein NMY-1 [Caenorhabditis elegans]	229375	85	111	0.493	SLEAELNDMRVQMEELEDNLQIAEDAR	93.1	3161.47
N2 Neg Ctrl IP	Protein NMY-1 [Caenorhabditis elegans]	229375	85	111	0.493	SMLQEREDQSILCTGESGAGK	52.5	2296.05
N2 Neg Ctrl IP	Protein NMY-1 [Caenorhabditis elegans]	229375	85	111	0.493	SRDELDHLNR	28.3	1254.62
N2 Neg Ctrl IP	Protein NMY-1 [Caenorhabditis elegans]	229375	85	111	0.493	TEAEKQSLER	53.9	1190.6
N2 Neg Ctrl IP	Protein NMY-1 [Caenorhabditis elegans]	229375	85	111	0.493	TGVLAHLEEERDLK	31.4	1609.85
N2 Neg Ctrl IP	Protein NMY-1 [Caenorhabditis elegans]	229375	85	111	0.493	TLIDQLER	49	987.547
N2 Neg Ctrl IP	Protein NMY-1 [Caenorhabditis elegans]	229375	85	111	0.493	TVSQLHKEQLTK	58.9	1411.79
N2 Neg Ctrl IP	Protein NMY-1 [Caenorhabditis elegans]	229375	85	111	0.493	VCHLLGLPVIELQK	38.2	1618.94
N2 Neg Ctrl IP	Protein NMY-1 [Caenorhabditis elegans]	229375	85	111	0.493	VDYSADQWLMK	66.7	1355.63
N2 Neg Ctrl IP	Protein NMY-1 [Caenorhabditis elegans]	229375	85	111	0.493	VIQYLAHVAGATR	79.1	1398.79
N2 Neg Ctrl IP	Protein NMY-1 [Caenorhabditis elegans]	229375	85	111	0.493	VKPLLQVTR	46	1053.68
N2 Neg Ctrl IP	Protein NMY-1 [Caenorhabditis elegans]	229375	85	111	0.493	VQMEELEDNLQIAEDAR	104	2002.94
N2 Neg Ctrl IP	Protein NMY-1 [Caenorhabditis elegans]	229375	85	111	0.493	VQYLEDQLNVEGQEKTAANR	49	2305.14
N2 Neg Ctrl IP	Protein NMY-1 [Caenorhabditis elegans]	229375	85	111	0.493	VVSAVLLLGNLEFTQEK	72.2	1860.05
N2 Neg Ctrl IP	Protein NMY-1 [Caenorhabditis elegans]	229375	85	111	0.493	VVSAVLLLGNLEFTQEKK	45.8	1988.14
N2 Neg Ctrl IP	Protein MYO-3 [Caenorhabditis elegans]	225515	62	76	0.373	AAAQVAFYEK	53.9	1097.56
N2 Neg Ctrl IP	Protein MYO-3 [Caenorhabditis elegans]	225515	62	76	0.373	AGKEQEAMGELAVK	62.9	1460.74
N2 Neg Ctrl IP	Protein MYO-3 [Caenorhabditis elegans]	225515	62	76	0.373	AIEQELDGEQR	69.4	1287.62
N2 Neg Ctrl IP	Protein MYO-3 [Caenorhabditis elegans]	225515	62	76	0.373	AIEQELDGEQRR	37.6	1443.72
N2 Neg Ctrl IP	Protein MYO-3 [Caenorhabditis elegans]	225515	62	76	0.373	AQIEVSQIR	35.3	1043.58
N2 Neg Ctrl IP	Protein MYO-3 [Caenorhabditis elegans]	225515	62	76	0.373	ASASMAPPDGFPMVPSASSALIR	25.8	2260.11
N2 Neg Ctrl IP	Protein MYO-3 [Caenorhabditis elegans]	225515	62	76	0.373	ATDMTYAQK	64	1028.47
N2 Neg Ctrl IP	Protein MYO-3 [Caenorhabditis elegans]	225515	62	76	0.373	CIIPNEKK	34.3	1001.54
N2 Neg Ctrl IP	Protein MYO-3 [Caenorhabditis elegans]	225515	62	76	0.373	CYHIFYQIMSGNDPSLR	37.2	2101.95
N2 Neg Ctrl IP	Protein MYO-3 [Caenorhabditis elegans]	225515	62	76	0.373	DLEESQHATDSEVR	88.4	1615.72
N2 Neg Ctrl IP	Protein MYO-3 [Caenorhabditis elegans]	225515	62	76	0.373	EKEEDSLNHETAISSLR	42.8	1957.95
N2 Neg Ctrl IP	Protein MYO-3 [Caenorhabditis elegans]	225515	62	76	0.373	ENQSMLITGESGAGKTENTK	3.17	2111.98
N2 Neg Ctrl IP	Protein MYO-3 [Caenorhabditis elegans]	225515	62	76	0.373	EQEAMGELAVK	51.3	1204.59
N2 Neg Ctrl IP	Protein MYO-3 [Caenorhabditis elegans]	225515	62	76	0.373	ESLNNLMNMLYQTHPHFIR	29.9	2358.15
N2 Neg Ctrl IP	Protein MYO-3 [Caenorhabditis elegans]	225515	62	76	0.373	GGTLEEQIVQTNPVLEAFGNAK	115	2315.19
N2 Neg Ctrl IP	Protein MYO-3 [Caenorhabditis elegans]	225515	62	76	0.373	HGDSVAELTEQLETLQK	51.5	1897.95
N2 Neg Ctrl IP	Protein MYO-3 [Caenorhabditis elegans]	225515	62	76	0.373	HQDTEKNWR	26.9	1213.57
N2 Neg Ctrl IP	Protein MYO-3 [Caenorhabditis elegans]	225515	62	76	0.373	HSTDNSLMLDIWQDYQTQEEAAEAAK	81.2	2994.34
N2 Neg Ctrl IP	Protein MYO-3 [Caenorhabditis elegans]	225515	62	76	0.373	IIAQLEAR	48.8	913.547
N2 Neg Ctrl IP	Protein MYO-3 [Caenorhabditis elegans]	225515	62	76	0.373	IQEKEEEFENTR	66.6	1551.73
N2 Neg Ctrl IP	Protein MYO-3 [Caenorhabditis elegans]	225515	62	76	0.373	IVTMFQSR	41.9	981.519
N2 Neg Ctrl IP	Protein MYO-3 [Caenorhabditis elegans]	225515	62	76	0.373	KASVGILDK	44.4	930.562
N2 Neg Ctrl IP	Protein MYO-3 [Caenorhabditis elegans]	225515	62	76	0.373	KIIAQLEAR	54.7	1041.64
N2 Neg Ctrl IP	Protein MYO-3 [Caenorhabditis elegans]	225515	62	76	0.373	LAGGDIEHYLLEK	69.1	1457.76
N2 Neg Ctrl IP	Protein MYO-3 [Caenorhabditis elegans]	225515	62	76	0.373	LDDAENAALKGGK	36.6	1301.67
N2 Neg Ctrl IP	Protein MYO-3 [Caenorhabditis elegans]	225515	62	76	0.373	LEDLRDEILSR	35.7	1358.73
N2 Neg Ctrl IP	Protein MYO-3 [Caenorhabditis elegans]	225515	62	76	0.373	LEEAVQRGEIAR	42.8	1370.74
N2 Neg Ctrl IP	Protein MYO-3 [Caenorhabditis elegans]	225515	62	76	0.373	LLDQHLGK	39.2	923.531
N2 Neg Ctrl IP	Protein MYO-3 [Caenorhabditis elegans]	225515	62	76	0.373	LMQDLDDAQSDVEK	101	1606.73
N2 Neg Ctrl IP	Protein MYO-3 [Caenorhabditis elegans]	225515	62	76	0.373	LNAEIQQWK	46.9	1129.6
N2 Neg Ctrl IP	Protein MYO-3 [Caenorhabditis elegans]	225515	62	76	0.373	LPIYSESVIK	33.2	1148.66
N2 Neg Ctrl IP	Protein MYO-3 [Caenorhabditis elegans]	225515	62	76	0.373	LSDITGQLEDMQERNEDLAR	67.7	2333.1
N2 Neg Ctrl IP	Protein MYO-3 [Caenorhabditis elegans]	225515	62	76	0.373	LTELVDKLQCK	24.7	1346.74
N2 Neg Ctrl IP	Protein MYO-3 [Caenorhabditis elegans]	225515	62	76	0.373	LTQEAFDIMGFEDNETMDLYR	120	2538.12
N2 Neg Ctrl IP	Protein MYO-3 [Caenorhabditis elegans]	225515	62	76	0.373	MLYPDFK	30.3	913.449
N2 Neg Ctrl IP	Protein MYO-3 [Caenorhabditis elegans]	225515	62	76	0.373	NAELEEELEAERNSR	35.4	1788.84
N2 Neg Ctrl IP	Protein MYO-3 [Caenorhabditis elegans]	225515	62	76	0.373	NKDPLNDTAVALLK	46.2	1511.84
N2 Neg Ctrl IP	Protein MYO-3 [Caenorhabditis elegans]	225515	62	76	0.373	NMVQDKENQSMLITGESGAGK	56.3	2237.05
N2 Neg Ctrl IP	Protein MYO-3 [Caenorhabditis elegans]	225515	62	76	0.373	NYDEESRER	38.1	1197.51
N2 Neg Ctrl IP	Protein MYO-3 [Caenorhabditis elegans]	225515	62	76	0.373	QALAATAK	42	773.452
N2 Neg Ctrl IP	Protein MYO-3 [Caenorhabditis elegans]	225515	62	76	0.373	QFESIIAEWK	49.6	1250.64
N2 Neg Ctrl IP	Protein MYO-3 [Caenorhabditis elegans]	225515	62	76	0.373	QKHDVETTLK	30.4	1198.64
N2 Neg Ctrl IP	Protein MYO-3 [Caenorhabditis elegans]	225515	62	76	0.373	QLQDFAALK	35.5	1033.57
N2 Neg Ctrl IP	Protein MYO-3 [Caenorhabditis elegans]	225515	62	76	0.373	QVEEAEEVAASNLNK	91.1	1630.79
N2 Neg Ctrl IP	Protein MYO-3 [Caenorhabditis elegans]	225515	62	76	0.373	QVEEAEEVAASNLNKYK	39.1	1921.95
N2 Neg Ctrl IP	Protein MYO-3 [Caenorhabditis elegans]	225515	62	76	0.373	RQFESIIAEWK	35.8	1406.74
N2 Neg Ctrl IP	Protein MYO-3 [Caenorhabditis elegans]	225515	62	76	0.373	RYEQQTGLLVVQR	51.9	1589.88
N2 Neg Ctrl IP	Protein MYO-3 [Caenorhabditis elegans]	225515	62	76	0.373	SLEEMDNQLNSLHR	67.8	1685.79
N2 Neg Ctrl IP	Protein MYO-3 [Caenorhabditis elegans]	225515	62	76	0.373	SLQDEMANQDEAVAK	63.1	1664.74
N2 Neg Ctrl IP	Protein MYO-3 [Caenorhabditis elegans]	225515	62	76	0.373	SQLESQVADLVEEK	81.9	1574.79
N2 Neg Ctrl IP	Protein MYO-3 [Caenorhabditis elegans]	225515	62	76	0.373	SSSFATVSMIYR	55.2	1348.66
N2 Neg Ctrl IP	Protein MYO-3 [Caenorhabditis elegans]	225515	62	76	0.373	STAGIMHMGEMK	82.1	1292.58
N2 Neg Ctrl IP	Protein MYO-3 [Caenorhabditis elegans]	225515	62	76	0.373	TIEVQYSELQTK	67.1	1438.74
N2 Neg Ctrl IP	Protein MYO-3 [Caenorhabditis elegans]	225515	62	76	0.373	TIEVQYSELQTKADEQSR	56.7	2126.03
N2 Neg Ctrl IP	Protein MYO-3 [Caenorhabditis elegans]	225515	62	76	0.373	VGTEWVNKGQNLEQVNWAVSGLAK	37.5	2627.36
N2 Neg Ctrl IP	Protein MYO-3 [Caenorhabditis elegans]	225515	62	76	0.373	VISYFAIVGATQAASGK	67.5	1682.91
N2 Neg Ctrl IP	Protein MYO-3 [Caenorhabditis elegans]	225515	62	76	0.373	VKEVEFQVVEEK	42.9	1462.78
N2 Neg Ctrl IP	Protein MYO-3 [Caenorhabditis elegans]	225515	62	76	0.373	VLTAQFEQAEERADIAENALSK	68	2434.21
N2 Neg Ctrl IP	Protein MYO-3 [Caenorhabditis elegans]	225515	62	76	0.373	VQELTDTNEGLFAK	56.3	1564.79
N2 Neg Ctrl IP	Protein MYO-3 [Caenorhabditis elegans]	225515	62	76	0.373	YAILAADAAK	53.1	1006.56
N2 Neg Ctrl IP	Protein MYO-3 [Caenorhabditis elegans]	225515	62	76	0.373	YAILAADAAKESDPK	49.1	1562.81
N2 Neg Ctrl IP	Protein MYO-3 [Caenorhabditis elegans]	225515	62	76	0.373	YEQQTGLLVVQR	48.9	1433.77
N2 Neg Ctrl IP	Protein ACT-4, isoform a [Caenorhabditis elegans]	40427.2	36	125	0.87	AGFAGDDAPR	68.5	976.448
N2 Neg Ctrl IP	Protein ACT-4, isoform a [Caenorhabditis elegans]	40427.2	36	125	0.87	AGFAGDDAPRAVFPSIVGRPR	26.8	2156.14
N2 Neg Ctrl IP	Protein ACT-4, isoform a [Caenorhabditis elegans]	40427.2	36	125	0.87	AVFPSIVGRPR	74.4	1198.71
N2 Neg Ctrl IP	Protein ACT-4, isoform a [Caenorhabditis elegans]	40427.2	36	125	0.87	CDIDIRK	41	919.467
N2 Neg Ctrl IP	Protein ACT-4, isoform a [Caenorhabditis elegans]	40427.2	36	125	0.87	CPEALFQPSFLGMESAGIHETSYNSIMK	87.1	3144.45
N2 Neg Ctrl IP	Protein ACT-4, isoform a [Caenorhabditis elegans]	40427.2	36	125	0.87	CPEALFQPSFLGMESAGIHETSYNSIMKCDIDIR	36.2	3916.8
N2 Neg Ctrl IP	Protein ACT-4, isoform a [Caenorhabditis elegans]	40427.2	36	125	0.87	DLTDYLMK	51.9	998.486
N2 Neg Ctrl IP	Protein ACT-4, isoform a [Caenorhabditis elegans]	40427.2	36	125	0.87	DLYANTVLSGGTTMYPGIADR	96	2215.07
N2 Neg Ctrl IP	Protein ACT-4, isoform a [Caenorhabditis elegans]	40427.2	36	125	0.87	DSYVGDEAQSK	63.9	1198.52
N2 Neg Ctrl IP	Protein ACT-4, isoform a [Caenorhabditis elegans]	40427.2	36	125	0.87	DSYVGDEAQSKR	61.3	1354.62
N2 Neg Ctrl IP	Protein ACT-4, isoform a [Caenorhabditis elegans]	40427.2	36	125	0.87	EITALAPSTMK	33	1177.61
N2 Neg Ctrl IP	Protein ACT-4, isoform a [Caenorhabditis elegans]	40427.2	36	125	0.87	EITALAPSTMKIK	22.9	1418.79
N2 Neg Ctrl IP	Protein ACT-4, isoform a [Caenorhabditis elegans]	40427.2	36	125	0.87	EKLCYVALDFEQEMATAASSSSLEK	64.9	2807.31
N2 Neg Ctrl IP	Protein ACT-4, isoform a [Caenorhabditis elegans]	40427.2	36	125	0.87	EKMTQIMFETFNTPAMYVAIQAVLSLYASGR	77.2	3510.75
N2 Neg Ctrl IP	Protein ACT-4, isoform a [Caenorhabditis elegans]	40427.2	36	125	0.87	FRCPEALFQPSFLGMESAGIHETSYNSIMK	96.8	3447.62
N2 Neg Ctrl IP	Protein ACT-4, isoform a [Caenorhabditis elegans]	40427.2	36	125	0.87	GYSFTTTAER	65.2	1132.53
N2 Neg Ctrl IP	Protein ACT-4, isoform a [Caenorhabditis elegans]	40427.2	36	125	0.87	GYSFTTTAEREIVR	47.5	1629.82
N2 Neg Ctrl IP	Protein ACT-4, isoform a [Caenorhabditis elegans]	40427.2	36	125	0.87	HQGVMVGMGQK	67	1187.57
N2 Neg Ctrl IP	Protein ACT-4, isoform a [Caenorhabditis elegans]	40427.2	36	125	0.87	HQGVMVGMGQKDSYVGDEAQSK	59.6	2351.08
N2 Neg Ctrl IP	Protein ACT-4, isoform a [Caenorhabditis elegans]	40427.2	36	125	0.87	IIAPPERK	33.6	923.567
N2 Neg Ctrl IP	Protein ACT-4, isoform a [Caenorhabditis elegans]	40427.2	36	125	0.87	IKIIAPPER	37.6	1036.65
N2 Neg Ctrl IP	Protein ACT-4, isoform a [Caenorhabditis elegans]	40427.2	36	125	0.87	ILTERGYSFTTTAER	41.9	1744.89
N2 Neg Ctrl IP	Protein ACT-4, isoform a [Caenorhabditis elegans]	40427.2	36	125	0.87	IWHHTFYNELR	57.4	1516.73
N2 Neg Ctrl IP	Protein ACT-4, isoform a [Caenorhabditis elegans]	40427.2	36	125	0.87	KDLYANTVLSGGTTMYPGIADR	114	2344.15
N2 Neg Ctrl IP	Protein ACT-4, isoform a [Caenorhabditis elegans]	40427.2	36	125	0.87	KYSVWIGGSILASLSTFQQMWISK	52.5	2730.43
N2 Neg Ctrl IP	Protein ACT-4, isoform a [Caenorhabditis elegans]	40427.2	36	125	0.87	LCYVALDFEQEMATAASSSSLEK	119	2551.16
N2 Neg Ctrl IP	Protein ACT-4, isoform a [Caenorhabditis elegans]	40427.2	36	125	0.87	LCYVALDFEQEMATAASSSSLEKSYELPDGQVITVGNER	91.4	4310.98
N2 Neg Ctrl IP	Protein ACT-4, isoform a [Caenorhabditis elegans]	40427.2	36	125	0.87	LDLAGRDLTDYLMK	45	1623.84
N2 Neg Ctrl IP	Protein ACT-4, isoform a [Caenorhabditis elegans]	40427.2	36	125	0.87	MQKEITALAPSTMK	87.5	1548.81
N2 Neg Ctrl IP	Protein ACT-4, isoform a [Caenorhabditis elegans]	40427.2	36	125	0.87	MTQIMFETFNTPAMYVAIQAVLSLYASGR	31.5	3253.61
N2 Neg Ctrl IP	Protein ACT-4, isoform a [Caenorhabditis elegans]	40427.2	36	125	0.87	QEYDESGPSIVHR	62.8	1516.7
N2 Neg Ctrl IP	Protein ACT-4, isoform a [Caenorhabditis elegans]	40427.2	36	125	0.87	QEYDESGPSIVHRK	56.6	1644.8
N2 Neg Ctrl IP	Protein ACT-4, isoform a [Caenorhabditis elegans]	40427.2	36	125	0.87	SYELPDGQVITVGNER	83.2	1776.88
N2 Neg Ctrl IP	Protein ACT-4, isoform a [Caenorhabditis elegans]	40427.2	36	125	0.87	TTGVVLDSGDGVTHTVPIYEGYALPHAILR	84.3	3151.64
N2 Neg Ctrl IP	Protein ACT-4, isoform a [Caenorhabditis elegans]	40427.2	36	125	0.87	VAPEEHPVLLTEAPLNPK	63.9	1954.06
N2 Neg Ctrl IP	Protein ACT-4, isoform a [Caenorhabditis elegans]	40427.2	36	125	0.87	YSVWIGGSILASLSTFQQMWISKQEYDESGPSIVHR	72.3	4116.02
N2 Neg Ctrl IP	Protein ACT-4, isoform b [Caenorhabditis elegans]	37279.8	0	0	0.889	CDIDIRK	41	919.467
N2 Neg Ctrl IP	Protein ACT-4, isoform b [Caenorhabditis elegans]	37279.8	0	0	0.889	CPEALFQPSFLGMESAGIHETSYNSIMK	87.1	3144.45
N2 Neg Ctrl IP	Protein ACT-4, isoform b [Caenorhabditis elegans]	37279.8	0	0	0.889	CPEALFQPSFLGMESAGIHETSYNSIMKCDIDIR	36.2	3916.8
N2 Neg Ctrl IP	Protein ACT-4, isoform b [Caenorhabditis elegans]	37279.8	0	0	0.889	DLTDYLMK	51.9	998.486
N2 Neg Ctrl IP	Protein ACT-4, isoform b [Caenorhabditis elegans]	37279.8	0	0	0.889	DLYANTVLSGGTTMYPGIADR	96	2215.07
N2 Neg Ctrl IP	Protein ACT-4, isoform b [Caenorhabditis elegans]	37279.8	0	0	0.889	DSYVGDEAQSK	63.9	1198.52
N2 Neg Ctrl IP	Protein ACT-4, isoform b [Caenorhabditis elegans]	37279.8	0	0	0.889	DSYVGDEAQSKR	61.3	1354.62
N2 Neg Ctrl IP	Protein ACT-4, isoform b [Caenorhabditis elegans]	37279.8	0	0	0.889	EITALAPSTMK	33	1177.61
N2 Neg Ctrl IP	Protein ACT-4, isoform b [Caenorhabditis elegans]	37279.8	0	0	0.889	EITALAPSTMKIK	22.9	1418.79
N2 Neg Ctrl IP	Protein ACT-4, isoform b [Caenorhabditis elegans]	37279.8	0	0	0.889	EKLCYVALDFEQEMATAASSSSLEK	64.9	2807.31
N2 Neg Ctrl IP	Protein ACT-4, isoform b [Caenorhabditis elegans]	37279.8	0	0	0.889	EKMTQIMFETFNTPAMYVAIQAVLSLYASGR	77.2	3510.75
N2 Neg Ctrl IP	Protein ACT-4, isoform b [Caenorhabditis elegans]	37279.8	0	0	0.889	FRCPEALFQPSFLGMESAGIHETSYNSIMK	96.8	3447.62
N2 Neg Ctrl IP	Protein ACT-4, isoform b [Caenorhabditis elegans]	37279.8	0	0	0.889	GYSFTTTAER	65.2	1132.53
N2 Neg Ctrl IP	Protein ACT-4, isoform b [Caenorhabditis elegans]	37279.8	0	0	0.889	GYSFTTTAEREIVR	47.5	1629.82
N2 Neg Ctrl IP	Protein ACT-4, isoform b [Caenorhabditis elegans]	37279.8	0	0	0.889	IIAPPERK	33.6	923.567
N2 Neg Ctrl IP	Protein ACT-4, isoform b [Caenorhabditis elegans]	37279.8	0	0	0.889	IKIIAPPER	37.6	1036.65
N2 Neg Ctrl IP	Protein ACT-4, isoform b [Caenorhabditis elegans]	37279.8	0	0	0.889	ILTERGYSFTTTAER	41.9	1744.89
N2 Neg Ctrl IP	Protein ACT-4, isoform b [Caenorhabditis elegans]	37279.8	0	0	0.889	IWHHTFYNELR	57.4	1516.73
N2 Neg Ctrl IP	Protein ACT-4, isoform b [Caenorhabditis elegans]	37279.8	0	0	0.889	KDLYANTVLSGGTTMYPGIADR	114	2344.15
N2 Neg Ctrl IP	Protein ACT-4, isoform b [Caenorhabditis elegans]	37279.8	0	0	0.889	KYSVWIGGSILASLSTFQQMWISK	52.5	2730.43
N2 Neg Ctrl IP	Protein ACT-4, isoform b [Caenorhabditis elegans]	37279.8	0	0	0.889	LCYVALDFEQEMATAASSSSLEK	119	2551.16
N2 Neg Ctrl IP	Protein ACT-4, isoform b [Caenorhabditis elegans]	37279.8	0	0	0.889	LCYVALDFEQEMATAASSSSLEKSYELPDGQVITVGNER	91.4	4310.98
N2 Neg Ctrl IP	Protein ACT-4, isoform b [Caenorhabditis elegans]	37279.8	0	0	0.889	LDLAGRDLTDYLMK	45	1623.84
N2 Neg Ctrl IP	Protein ACT-4, isoform b [Caenorhabditis elegans]	37279.8	0	0	0.889	MQKEITALAPSTMK	87.5	1548.81
N2 Neg Ctrl IP	Protein ACT-4, isoform b [Caenorhabditis elegans]	37279.8	0	0	0.889	MTQIMFETFNTPAMYVAIQAVLSLYASGR	31.5	3253.61
N2 Neg Ctrl IP	Protein ACT-4, isoform b [Caenorhabditis elegans]	37279.8	0	0	0.889	QEYDESGPSIVHR	62.8	1516.7
N2 Neg Ctrl IP	Protein ACT-4, isoform b [Caenorhabditis elegans]	37279.8	0	0	0.889	QEYDESGPSIVHRK	56.6	1644.8
N2 Neg Ctrl IP	Protein ACT-4, isoform b [Caenorhabditis elegans]	37279.8	0	0	0.889	SYELPDGQVITVGNER	83.2	1776.88
N2 Neg Ctrl IP	Protein ACT-4, isoform b [Caenorhabditis elegans]	37279.8	0	0	0.889	TTGVVLDSGDGVTHTVPIYEGYALPHAILR	84.3	3151.64
N2 Neg Ctrl IP	Protein ACT-4, isoform b [Caenorhabditis elegans]	37279.8	0	0	0.889	VAPEEHPVLLTEAPLNPK	63.9	1954.06
N2 Neg Ctrl IP	Protein ACT-4, isoform b [Caenorhabditis elegans]	37279.8	0	0	0.889	YSVWIGGSILASLSTFQQMWISKQEYDESGPSIVHR	72.3	4116.02
N2 Neg Ctrl IP	Protein ABTS-3, isoform a [Caenorhabditis elegans]	107986	20	24	0.236	ALADVEER	57	902.458
N2 Neg Ctrl IP	Protein ABTS-3, isoform a [Caenorhabditis elegans]	107986	20	24	0.236	ATMDIDHLLNK	87.8	1270.65
N2 Neg Ctrl IP	Protein ABTS-3, isoform a [Caenorhabditis elegans]	107986	20	24	0.236	AVLLLDLQETSLEEIFAK	101	2032.12
N2 Neg Ctrl IP	Protein ABTS-3, isoform a [Caenorhabditis elegans]	107986	20	24	0.236	ELAMDQNQWR	53.3	1290.59
N2 Neg Ctrl IP	Protein ABTS-3, isoform a [Caenorhabditis elegans]	107986	20	24	0.236	EQIFGPEAWYPFR	45.7	1639.79
N2 Neg Ctrl IP	Protein ABTS-3, isoform a [Caenorhabditis elegans]	107986	20	24	0.236	FIIIVIAPSR	39	1128.71
N2 Neg Ctrl IP	Protein ABTS-3, isoform a [Caenorhabditis elegans]	107986	20	24	0.236	GLVEEFKR	33.7	977.542
N2 Neg Ctrl IP	Protein ABTS-3, isoform a [Caenorhabditis elegans]	107986	20	24	0.236	IIHEMDIQEPEFTSEQVR	84.8	2201.05
N2 Neg Ctrl IP	Protein ABTS-3, isoform a [Caenorhabditis elegans]	107986	20	24	0.236	IPMKDFGSEIR	40.5	1292.67
N2 Neg Ctrl IP	Protein ABTS-3, isoform a [Caenorhabditis elegans]	107986	20	24	0.236	LSHPTNLGR	31.1	994.543
N2 Neg Ctrl IP	Protein ABTS-3, isoform a [Caenorhabditis elegans]	107986	20	24	0.236	LVMAQSVEQFR	72.7	1307.68
N2 Neg Ctrl IP	Protein ABTS-3, isoform a [Caenorhabditis elegans]	107986	20	24	0.236	NYNDCDTSAISMK	86.4	1518.62
N2 Neg Ctrl IP	Protein ABTS-3, isoform a [Caenorhabditis elegans]	107986	20	24	0.236	RHDSDASGSANSEATVASGANTPR	30.6	2358.07
N2 Neg Ctrl IP	Protein ABTS-3, isoform a [Caenorhabditis elegans]	107986	20	24	0.236	STLLSAAK	35.7	790.467
N2 Neg Ctrl IP	Protein ABTS-3, isoform a [Caenorhabditis elegans]	107986	20	24	0.236	STLLSAAKELAMDQNQWR	25.6	2062.04
N2 Neg Ctrl IP	Protein ABTS-3, isoform a [Caenorhabditis elegans]	107986	20	24	0.236	SVLFTQDAGNQFHILSR	37.2	1932.99
N2 Neg Ctrl IP	Protein ABTS-3, isoform a [Caenorhabditis elegans]	107986	20	24	0.236	TALETTR	42.9	791.426
N2 Neg Ctrl IP	Protein ABTS-3, isoform a [Caenorhabditis elegans]	107986	20	24	0.236	TALNAFK	44.9	764.43
N2 Neg Ctrl IP	Protein ABTS-3, isoform a [Caenorhabditis elegans]	107986	20	24	0.236	VSQGHVHEVIMNVR	31.4	1604.83
N2 Neg Ctrl IP	Protein ABTS-3, isoform a [Caenorhabditis elegans]	107986	20	24	0.236	YLDALDGRH	47.2	1059.52
N2 Neg Ctrl IP	Protein VIT-1 [Caenorhabditis elegans]	188065	3	3	0.0198	ICFSVEPVAECR	19.7	1466.68
N2 Neg Ctrl IP	Protein VIT-1 [Caenorhabditis elegans]	188065	3	3	0.0198	MFTPLFEQGVK	33.5	1296.67
N2 Neg Ctrl IP	Protein VIT-1 [Caenorhabditis elegans]	188065	3	3	0.0198	TQIKEFSHR	29.3	1145.61
N2 Neg Ctrl IP	Protein VIT-6, isoform a [Caenorhabditis elegans]	193318	13	13	0.104	ATINVEPR	22.7	899.495
N2 Neg Ctrl IP	Protein VIT-6, isoform a [Caenorhabditis elegans]	193318	13	13	0.104	FAENDQPWSENIKR	21.4	1733.82
N2 Neg Ctrl IP	Protein VIT-6, isoform a [Caenorhabditis elegans]	193318	13	13	0.104	FATSQQESNSMK	62.5	1357.61
N2 Neg Ctrl IP	Protein VIT-6, isoform a [Caenorhabditis elegans]	193318	13	13	0.104	FLHQAVLNTPVDTEIR	44.2	1852.99
N2 Neg Ctrl IP	Protein VIT-6, isoform a [Caenorhabditis elegans]	193318	13	13	0.104	INTFDQVAYR	58.4	1226.62
N2 Neg Ctrl IP	Protein VIT-6, isoform a [Caenorhabditis elegans]	193318	13	13	0.104	KFEWLQNEK	42.3	1221.63
N2 Neg Ctrl IP	Protein VIT-6, isoform a [Caenorhabditis elegans]	193318	13	13	0.104	MPTISSIR	24.3	904.492
N2 Neg Ctrl IP	Protein VIT-6, isoform a [Caenorhabditis elegans]	193318	13	13	0.104	NLRDQPQMEER	33.7	1415.67
N2 Neg Ctrl IP	Protein VIT-6, isoform a [Caenorhabditis elegans]	193318	13	13	0.104	QIEQGEAELEAAHTVAR	44.5	1851.92
N2 Neg Ctrl IP	Protein VIT-6, isoform a [Caenorhabditis elegans]	193318	13	13	0.104	QLVVMGEMNYGENTIHININGQQSQEQK	1.04	3205.48
N2 Neg Ctrl IP	Protein VIT-6, isoform a [Caenorhabditis elegans]	193318	13	13	0.104	SYANNESPCEQTFSSR	63.1	1876.78
N2 Neg Ctrl IP	Protein VIT-6, isoform a [Caenorhabditis elegans]	193318	13	13	0.104	VASTHVLSLR	32.7	1082.63
N2 Neg Ctrl IP	Protein VIT-6, isoform a [Caenorhabditis elegans]	193318	13	13	0.104	VQGTLNRPTSVR	18.8	1327.74
N2 Neg Ctrl IP	Protein F54B3.1, isoform a [Caenorhabditis elegans]	410998	3	3	0.0123	IRNQGQLLHR	0.08	1236.68
N2 Neg Ctrl IP	Protein F54B3.1, isoform a [Caenorhabditis elegans]	410998	3	3	0.0123	MENDPVIDQRYAGNPIEDAIFK	0.23	2553.18
N2 Neg Ctrl IP	Protein F54B3.1, isoform a [Caenorhabditis elegans]	410998	3	3	0.0123	NIFDGFGENMIR	0.46	1429.64
N2 Neg Ctrl IP	Protein K03E5.2, isoform a [Caenorhabditis elegans]	22822.9	3	3	0.213	LQSGTNQFESQK	48.3	1366.66
N2 Neg Ctrl IP	Protein K03E5.2, isoform a [Caenorhabditis elegans]	22822.9	3	3	0.213	LQSGTNQYESQK	55.4	1382.65
N2 Neg Ctrl IP	Protein K03E5.2, isoform a [Caenorhabditis elegans]	22822.9	3	3	0.213	QTDAMVPLQSGTNQFDSQR	81.8	2123.97
N2 Neg Ctrl IP	Protein RPL-17, isoform a [Caenorhabditis elegans]	21512.9	2	2	0.107	NTHEAAMALR	25.9	1113.55
N2 Neg Ctrl IP	Protein RPL-17, isoform a [Caenorhabditis elegans]	21512.9	2	2	0.107	SADFLLDLLK	55.7	1134.64
N2 Neg Ctrl IP	Protein AHCY-1 [Caenorhabditis elegans]	47536.3	7	8	0.222	ATDVMLAGK	67.2	905.476
N2 Neg Ctrl IP	Protein AHCY-1 [Caenorhabditis elegans]	47536.3	7	8	0.222	FGTPQEYK	34.3	969.468
N2 Neg Ctrl IP	Protein AHCY-1 [Caenorhabditis elegans]	47536.3	7	8	0.222	GLSEETTTGVHNLAK	68.9	1556.79
N2 Neg Ctrl IP	Protein AHCY-1 [Caenorhabditis elegans]	47536.3	7	8	0.222	HVILLAEGR	44.6	1007.6
N2 Neg Ctrl IP	Protein AHCY-1 [Caenorhabditis elegans]	47536.3	7	8	0.222	TLDEEVAYLHLAQLGVK	44.9	1899.02
N2 Neg Ctrl IP	Protein AHCY-1 [Caenorhabditis elegans]	47536.3	7	8	0.222	VIVTEIDPINALQAAMEGYEVTTLEEAAPK	88	3215.64
N2 Neg Ctrl IP	Protein AHCY-1 [Caenorhabditis elegans]	47536.3	7	8	0.222	YPQYLAGIR	55.7	1080.58
N2 Neg Ctrl IP	Protein HUM-2, isoform a [Caenorhabditis elegans]	210350	7	7	0.0577	FSESQTVFRPSDCSLDEAVR	47.1	2330.07
N2 Neg Ctrl IP	Protein HUM-2, isoform a [Caenorhabditis elegans]	210350	7	7	0.0577	LVFQAPGER	22.4	1016.55
N2 Neg Ctrl IP	Protein HUM-2, isoform a [Caenorhabditis elegans]	210350	7	7	0.0577	QSEELAEAR	47.3	1032.5
N2 Neg Ctrl IP	Protein HUM-2, isoform a [Caenorhabditis elegans]	210350	7	7	0.0577	SQSIIVSGESGAGK	79.8	1319.68
N2 Neg Ctrl IP	Protein HUM-2, isoform a [Caenorhabditis elegans]	210350	7	7	0.0577	TVIGSTAPTSVSSSSSSSTPGKR	21.5	2181.1
N2 Neg Ctrl IP	Protein HUM-2, isoform a [Caenorhabditis elegans]	210350	7	7	0.0577	VLASNPIMESIGNAK	64.6	1543.81
N2 Neg Ctrl IP	Protein HUM-2, isoform a [Caenorhabditis elegans]	210350	7	7	0.0577	YLQMHRAVIVMQSAVR	18.3	1919.98
N2 Neg Ctrl IP	Protein RPL-2 [Caenorhabditis elegans]	28204	1	1	0.0615	ASGNYATVIAHNPDTK	33.5	1658.81
N2 Neg Ctrl IP	Protein AJM-1, isoform a [Caenorhabditis elegans]	137476	4	4	0.0284	ASNPSIYQSSR	38.7	1209.59
N2 Neg Ctrl IP	Protein AJM-1, isoform a [Caenorhabditis elegans]	137476	4	4	0.0284	EVMTRTIITR	0.31	1235.68
N2 Neg Ctrl IP	Protein AJM-1, isoform a [Caenorhabditis elegans]	137476	4	4	0.0284	NHLLSSETLAK	39.3	1212.66
N2 Neg Ctrl IP	Protein AJM-1, isoform a [Caenorhabditis elegans]	137476	4	4	0.0284	SEKEQFELEK	34.9	1266.62
N2 Neg Ctrl IP	Protein HUM-5 [Caenorhabditis elegans]	116561	7	7	0.0806	CLNVTPDELAK	34.4	1259.63
N2 Neg Ctrl IP	Protein HUM-5 [Caenorhabditis elegans]	116561	7	7	0.0806	LICASTWPNPR	67.7	1314.66
N2 Neg Ctrl IP	Protein HUM-5 [Caenorhabditis elegans]	116561	7	7	0.0806	QYYFLNQGQSHK	44.2	1512.72
N2 Neg Ctrl IP	Protein HUM-5 [Caenorhabditis elegans]	116561	7	7	0.0806	SVVQNLQLR	36.2	1056.62
N2 Neg Ctrl IP	Protein HUM-5 [Caenorhabditis elegans]	116561	7	7	0.0806	VASINDSRDFAEVQTALR	59.9	1992.01
N2 Neg Ctrl IP	Protein HUM-5 [Caenorhabditis elegans]	116561	7	7	0.0806	VNEAISVQNSSR	74.3	1303.66
N2 Neg Ctrl IP	Protein HUM-5 [Caenorhabditis elegans]	116561	7	7	0.0806	YLAAITNVR	26.2	1020.58
N2 Neg Ctrl IP	Protein MLC-5 [Caenorhabditis elegans]	15970.3	5	6	0.655	ALGQNPTEAEIHK	65.7	1407.72
N2 Neg Ctrl IP	Protein MLC-5 [Caenorhabditis elegans]	15970.3	5	6	0.655	HTVEEFVEGLSHFDKEGNGMINVAELR	49.3	3058.46
N2 Neg Ctrl IP	Protein MLC-5 [Caenorhabditis elegans]	15970.3	5	6	0.655	ISVQQVGDVLR	76.6	1213.69
N2 Neg Ctrl IP	Protein MLC-5 [Caenorhabditis elegans]	15970.3	5	6	0.655	LSDEDVDQLLSGHNDSHGNVNISDFVR	38.3	2984.35
N2 Neg Ctrl IP	Protein MLC-5 [Caenorhabditis elegans]	15970.3	5	6	0.655	LSFEDFVPIFQSVSK	54	1742.9
N2 Neg Ctrl IP	Protein MLC-3, isoform a [Caenorhabditis elegans]	17145.1	2	3	0.15	AAGLKPTQAMVTK	53	1315.74
N2 Neg Ctrl IP	Protein MLC-3, isoform a [Caenorhabditis elegans]	17145.1	2	3	0.15	VLAGPFPDQD	73.3	1058.52
N2 Neg Ctrl IP	Protein LYS-1 [Caenorhabditis elegans]	32379.4	5	5	0.208	AFGSFKK	32.6	784.435
N2 Neg Ctrl IP	Protein LYS-1 [Caenorhabditis elegans]	32379.4	5	5	0.208	GFTPFGSGAFDTTSVTSIR	82.6	1947.94
N2 Neg Ctrl IP	Protein LYS-1 [Caenorhabditis elegans]	32379.4	5	5	0.208	SATTNVNFLNSIISR	95.3	1636.87
N2 Neg Ctrl IP	Protein LYS-1 [Caenorhabditis elegans]	32379.4	5	5	0.208	SVWIQVTSPANWQK	62.6	1643.85
N2 Neg Ctrl IP	Protein LYS-1 [Caenorhabditis elegans]	32379.4	5	5	0.208	YAAVFIR	32.4	839.477
N2 Neg Ctrl IP	Protein RPL-7A, isoform a [Caenorhabditis elegans]	27939.1	3	3	0.128	HWGGGVMSAK	30.3	1029.49
N2 Neg Ctrl IP	Protein RPL-7A, isoform a [Caenorhabditis elegans]	27939.1	3	3	0.128	NFNIGQDIQPK	22.6	1273.65
N2 Neg Ctrl IP	Protein RPL-7A, isoform a [Caenorhabditis elegans]	27939.1	3	3	0.128	TALDSQSARQAFK	0.58	1424.7
N2 Neg Ctrl IP	Protein UNC-44, isoform f [Caenorhabditis elegans]	775384	2	2	0.005	ALSGVQEPEDRPENFAESHEK	1.89	2369.1
N2 Neg Ctrl IP	Protein UNC-44, isoform f [Caenorhabditis elegans]	775384	2	2	0.005	HVHDSEDGPVVEER	35.3	1604.73
N2 Neg Ctrl IP	Protein LEC-2, isoform b [Caenorhabditis elegans]	131928	6	6	0.288	FDEGKLVFNTFSK	37.6	1531.78
N2 Neg Ctrl IP	Protein LEC-2, isoform b [Caenorhabditis elegans]	131928	6	6	0.288	FDEKHVVR	36.6	1029.55
N2 Neg Ctrl IP	Protein LEC-2, isoform b [Caenorhabditis elegans]	131928	6	6	0.288	FTVNLHTNTADFSGNDVPLHVSVR	74.8	2641.3
N2 Neg Ctrl IP	Protein LEC-2, isoform b [Caenorhabditis elegans]	131928	6	6	0.288	GEWGKEER	35.6	990.464
N2 Neg Ctrl IP	Protein LEC-2, isoform b [Caenorhabditis elegans]	131928	6	6	0.288	SKLVEPFEPGQTLIVK	40.2	1785.02
N2 Neg Ctrl IP	Protein LEC-2, isoform b [Caenorhabditis elegans]	131928	6	6	0.288	TLTVFGIPEKK	27.1	1232.73
N2 Neg Ctrl IP	Protein LEC-1, isoform b [Caenorhabditis elegans]	32684.3	10	12	0.396	FDEKHVIR	38.3	1043.56
N2 Neg Ctrl IP	Protein LEC-1, isoform b [Caenorhabditis elegans]	32684.3	10	12	0.396	KNGDISFHFNPR	37.8	1432.7
N2 Neg Ctrl IP	Protein LEC-1, isoform b [Caenorhabditis elegans]	32684.3	10	12	0.396	NSLAANEWGNEER	74.2	1489.67
N2 Neg Ctrl IP	Protein LEC-1, isoform b [Caenorhabditis elegans]	32684.3	10	12	0.396	RFHVNLLR	31.4	1054.63
N2 Neg Ctrl IP	Protein LEC-1, isoform b [Caenorhabditis elegans]	32684.3	10	12	0.396	SLLVFGTVEK	50.5	1092.63
N2 Neg Ctrl IP	Protein LEC-1, isoform b [Caenorhabditis elegans]	32684.3	10	12	0.396	SLLVFGTVEKK	31.9	1220.72
N2 Neg Ctrl IP	Protein LEC-1, isoform b [Caenorhabditis elegans]	32684.3	10	12	0.396	SVLQEKFEPGQTLIVK	67	1816.02
N2 Neg Ctrl IP	Protein LEC-1, isoform b [Caenorhabditis elegans]	32684.3	10	12	0.396	TADFSGNDVPLHVSVR	39.6	1713.86
N2 Neg Ctrl IP	Protein LEC-1, isoform b [Caenorhabditis elegans]	32684.3	10	12	0.396	WYEQNKPVPYR	25.5	1479.74
N2 Neg Ctrl IP	Protein LEC-1, isoform b [Caenorhabditis elegans]	32684.3	10	12	0.396	YYPVPYESGLANGLPVGK	66.7	1924.97
