# Supplementary material for: The PUF binding landscape in metazoan germ cells
Source: RNA. 2016 Jul;22(7):1026–43. doi: 10.1261/rna.055871.116 (PMC4911911; doi:10.1261/rna.055871.116)
Supplement: Supplemental Material [file supp_055871.116_Supplemental_Table_S5.xlsx]

## Sheet: tab 1 sex determination targets
Gene name
cpb-1
cpb-3
ddx-23
fbf-1
fbf-2
fem-1
fem-2
fem-3
fog-1
daz-1
gld-1
gld-2
gld-3
gls-1
larp-1
mpk-1
puf-8
tra-1

## Sheet: tab2 FBF and yeast PUF shared
Worm locus ID	Yeast Ensembl ID	Yeast gene name	Human ortholog Ensembl IDs
F29G9.5	YDL007W	RPT2	-
Y47G6A.10	YER017C, YMR089C	YTA12, AFG3	ENSG00000136758
F32D1.1	YER047C, YPL074W	SAP1, YTA6	ENSG00000182263,ENSG00000021574
F59E10.2	YDR304C, YHR057C	CPR5, CPR2	-
ZK1248.3	YBL047C	EDE1	-
Y69A2AR.6	YOR327C, YAL030W	SNC2, SNC1	ENSG00000117533
C42D4.8	YDL140C	RPO21	-
W02B12.6	YOR335C	ALA1	-
Y104H12BR.1	YDR129C	SAC6	ENSG00000102024
C43E11.9	YPL211W	NIP7	ENSG00000132603
T01C3.7	YDL014W	NOP1	-
C14B9.7	YBR191W, YPL079W	RPL21A, RPL21B	ENSG00000122026
Y116A8A.9	YBL091C	MAP2	-
Y87G2A.6	YDR304C, YHR057C	CPR5, CPR2	-
T27A8.3	YBL091C	MAP2	-
F31D4.3	YNL135C	FPR1	ENSG00000096060,ENSG00000004478
ZK632.8	YDL137W	ARF2	ENSG00000162980,ENSG00000165997
C24B5.2	YER047C, YPL074W	SAP1, YTA6	ENSG00000021574
Y54G11A.11	YKL160W	ELF1	-
C34D4.12	YDR304C, YHR057C	CPR5, CPR2	-
F08G2.2	YDR225W	HTA1	-
F36A4.7	YDL140C	RPO21	-
C41G7.2	YPR141C	KAR3	-
F37C12.7	YMR246W, YOR317W, YIL009W	FAA4, FAA1, FAA3	ENSG00000068366,ENSG00000123983
W02B12.10	YDL201W	TRM8	-
Y54H5A.4	YNL240C	NAR1	-
K08H2.1	YDR328C	SKP1	-
C45G3.3	YJL046W	AIM22	-
F54E12.5	YDR225W	HTA1	-
T27D1.1	YDR304C, YHR057C	CPR5, CPR2	-
F34D6.4	YJL168C	SET2	-
F08F1.7	YDR107C, YLR083C	TMN2, EMP70	-
C52D10.9	YDR328C	SKP1	-
F18A11.1	YLL013C	PUF3	ENSG00000055917,ENSG00000134644
Y47D7A.1	YDR328C	SKP1	-
C25H3.8	YLL040C	VPS13	-
C16C2.3	YIL002C, YNL106C, YOR109W	INP51, INP53, INP52	-
C16A3.1	YPL082C	MOT1	-
C42D4.6	YDR328C	SKP1	-
F52A8.5	YAL044C	GCV3	ENSG00000140905
F35F11.1	YLR418C	CDC73	-
B0273.2	YLL013C	PUF3	ENSG00000055917,ENSG00000134644
Y47G6A.11	YDR097C	MSH6	ENSG00000113318
T10H9.4	YOR327C, YAL030W	SNC2, SNC1	ENSG00000117533
T06E6.2	YGR109C, YDL155W, YPR119W, YGR108W, YLR210W, YPR120C	CLB3, CLB2, CLB1, CLB6, CLB5, CLB4	ENSG00000145386
ZC168.4	YGR109C, YDL155W, YPR119W, YGR108W, YLR210W, YPR120C	CLB3, CLB2, CLB1, CLB6, CLB5, CLB4	ENSG00000145386
R06C1.1	YNL330C	RPD3	ENSG00000171720
F54D10.1	YDR328C	SKP1	-
C47E8.5	YMR186W	HSC82	-
F32H2.1	YKR099W	BAS1	ENSG00000118513
T12F5.4	YJL168C	SET2	ENSG00000116539
Y43C5A.6	YER095W	RAD51	-
C10C6.6	YEL031W	SPF1	-
Y17G7B.9	YDR304C, YHR057C	CPR5, CPR2	-
K06H7.4	YDR170C	SEC7	ENSG00000108669,ENSG00000008256
C26E6.3	YNL288W	CAF40	ENSG00000144580
Y41E3.10	YPR047W	MSF1	-
F23B12.8	YBL063W, YEL061C	KIP1, CIN8	-
F53B6.5	YBL091C	MAP2	-
T09A5.2	YPR141C	KAR3	ENSG00000204197
B0252.4	YDR304C, YHR057C	CPR5, CPR2	-
C32F10.1	YHR001W, YKR003W	OSH6, OSH7	-
Y48G1A.5	YGL238W	CSE1	-
ZC410.2	YLR163C	MAS1	ENSG00000105819
F58A4.9	YNL113W	RPC19	-
W06H8.1	YBL047C	EDE1	-
C52D10.6	YDR328C	SKP1	-
R107.4	YCR073C, YNR031C	SSK22, SSK2	ENSG00000213341,ENSG00000183735
C08B11.2	YNL330C	RPD3	-
ZK1320.6	YDL137W	ARF2	-
W02G9.5	YAL021C	CCR4	-
Y60A3A.18	YDR328C	SKP1	-
Y105C5B.13	YDR328C	SKP1	-
W06H3.2	YGL063W, YPL212C	PUS1, PUS2	-
Y55F3AR.2	YLR043C, YGR209C	TRX2, TRX1	ENSG00000091164
R06C7.8	YGR188C, YJL013C	BUB1, MAD3	ENSG00000169679
T15H9.7	YNL064C	YDJ1	-
T05H10.2	YKL114C	APN1	-
Y113G7B.23	YJL176C	SWI3	-
Y39B6A.38	YBL047C	EDE1	-
ZC518.3	YAL021C	CCR4	-
Y43E12A.1	YGR109C, YDL155W, YPR119W, YGR108W, YLR210W, YPR120C	CLB3, CLB2, CLB1, CLB6, CLB5, CLB4	ENSG00000145386
F59A2.1	YDR002W	YRB1	ENSG00000153201
F44G3.6	YDR328C	SKP1	-
F57B9.2	YCR093W	CDC39	-
Y44E3A.3	YLR043C, YGR209C	TRX2, TRX1	-
Y64H9A.1	YBR210W, YGL054C	ERV15, ERV14	-
Y37H2C.2	YDR328C	SKP1	-
F57H12.1	YDL137W	ARF2	-
Y73B6BL.38	YLL013C	PUF3	ENSG00000055917,ENSG00000134644
T24H7.1	YGR231C	PHB2	-
W09G3.7	YGL097W	SRM1	-
K06C4.3	YDR225W	HTA1	-
B0511.6	YMR290C	HAS1	ENSG00000088205
C16A3.4	YBR267W, YLR387C	REI1, REH1	-
Y38F2AR.7	YER017C, YMR089C	YTA12, AFG3	-
R04A9.7	YHR205W, YKL126W, YMR104C	YPK2, YPK1, SCH9	-
T06D8.6	YAL039C	CYC3	ENSG00000004961
Y47D3A.16	YHR205W, YKL126W, YMR104C	YPK2, YPK1, SCH9	ENSG00000104205,ENSG00000105221
F54A3.4	YGR155W	CYS4	-
T25D3.3	YGR155W	CYS4	-
C01G10.8	YDR214W, YNL281W	AHA1, HCH1	-
Y6B3A.1	YDR170C	SEC7	ENSG00000066777,ENSG00000124198
ZK858.6	YDR107C, YLR083C	TMN2, EMP70	-
F35G12.3	YBR059C, YIL095W, YNL020C	AKL1, PRK1, ARK1	ENSG00000138756
F46G11.3	YBR059C, YIL095W, YNL020C	AKL1, PRK1, ARK1	-
ZK131.6	YDR225W	HTA1	-
C07H6.5	YDL160C	DHH1	ENSG00000110367
T24C4.5	YIR008C	PRI1	-
T05E11.3	YMR186W	HSC82	-
Y51H4A.3	YPR165W	RHO1	ENSG00000067560
W03D2.4	YBR088C	POL30	ENSG00000132646
F13B12.4	YGR155W	CYS4	-
D1025.2	YAL044C	GCV3	ENSG00000140905
C06G3.2	YBL063W, YEL061C	KIP1, CIN8	-
C10H11.8	YNL006W	LST8	-
Y18H1A.6	YML061C, YHR031C	PIF1, RRM3	-
C25H3.11	YLL040C	VPS13	-
T20H4.3	YHR020W	-	-
C50C3.7	YIL002C, YNL106C, YOR109W	INP51, INP53, INP52	-
B0491.1	YJR013W	GPI14	ENSG00000143315
F19H8.3	YDL137W	ARF2	-
D1007.6	YOR293W	RPS10A	-
F42G9.2	YDR304C, YHR057C	CPR5, CPR2	-
Y18D10A.19	YNL135C	FPR1	ENSG00000096060,ENSG00000004478
H31G24.4	YGR109C, YDL155W, YPR119W, YGR108W, YLR210W, YPR120C	CLB3, CLB2, CLB1, CLB6, CLB5, CLB4	ENSG00000145386
ZC434.5	YHR020W	-	-
Y67H2A.2	YHR158C, YGR238C	KEL1, KEL2	-
K07A1.2	YBR252W	DUT1	-
F28H6.1	YHR205W, YKL126W, YMR104C	YPK2, YPK1, SCH9	ENSG00000104205,ENSG00000105221
F27D4.5	YBR221C	PDB1	ENSG00000083123
F31C3.3	YPR117W	-	-
Y71G12B.12	YPL149W	ATG5	-
ZK669.4	YNL071W	LAT1	-
C15H11.8	YJR063W	RPA12	-
C52E12.2	YBL063W, YEL061C	KIP1, CIN8	-
C52D10.7	YDR328C	SKP1	-
F01D4.8	YGR155W	CYS4	-
W06B11.2	YLL013C	PUF3	ENSG00000055917,ENSG00000134644
B0336.13	YKL058W	TOA2	-
T23D8.6	YDR225W	HTA1	-
Y111B2A.13	YKL058W	TOA2	-
Y54E10BR.6	YDR404C	RPB7	-
F35H8.7	YJL187C	SWE1	-
Y55D9A.1	YDR170C	SEC7	-
F14B4.3	YPR010C	RPA135	ENSG00000125630
F17E9.13	YDR225W	HTA1	-
M02B7.4	YBR070C	ALG14	-
F56D2.1	YLR163C	MAS1	ENSG00000105819
C53A5.17	YHR070W	TRM5	-
Y39G8B.5	YCR073C, YNR031C	SSK22, SSK2	ENSG00000213341,ENSG00000183735
K12G11.3	YMR083W, YMR303C, YOL086C, YBR145W	ADH3, ADH2, ADH1, ADH5	-
F46A9.4	YDR328C	SKP1	-
F10E7.5	YKL009W	MRT4	-
F23B12.5	YNL071W	LAT1	-
F47H4.10	YDR328C	SKP1	-
D1009.2	YDR304C, YHR057C	CPR5, CPR2	-
F55F10.1	YLR106C	MDN1	-
C49H3.10	YKL205W	LOS1	ENSG00000184575
F31C3.1	YDR304C, YHR057C	CPR5, CPR2	-
C53H9.1	YDR471W	RPL27B	-
Y38F1A.5	YGR109C, YDL155W, YPR119W, YGR108W, YLR210W, YPR120C	CLB3, CLB2, CLB1, CLB6, CLB5, CLB4	-
W09C5.1	YER126C	NSA2	-
F22B5.1	YDL137W	ARF2	-
F20C5.4	YNR048W, YNL323W, YCR094W	LEM3, CDC50	ENSG00000112697
C52D10.8	YDR328C	SKP1	-
K01C8.9	YER006W	NUG1	-
M02B7.5	YDR170C	SEC7	ENSG00000144711,ENSG00000164117
R53.2	YJR057W	CDC8	-
F39B2.10	YNL064C	YDJ1	ENSG00000069345
R02D3.3	YDR311W	TFB1	-
T01B7.4	YDR304C, YHR057C	CPR5, CPR2	-
T09E8.3	YBR210W, YGL054C	ERV15, ERV14	-
W03G11.2	YNR048W, YNL323W, YCR094W	LEM3, CDC50	-
E04D5.1	YGR054W	-	ENSG00000144895
Y47G6A.8	YKL113C	RAD27	-
ZC373.1	YGR155W	CYS4	-
ZK829.7	YMR083W, YMR303C, YOL086C, YBR145W	ADH3, ADH2, ADH1, ADH5	-
Y105E8A.19	YGR185C	TYS1	-
Y41D4B.12	YJL168C	SET2	ENSG00000143379,ENSG00000087495
F46B6.6	YOL023W	IFM1	-
Y45F10A.2	YLL013C	PUF3	ENSG00000055917,ENSG00000134644
M03C11.5	YPR024W	YME1	ENSG00000136758
C25D7.6	YEL032W	MCM3	-
C06A8.4	YDR328C	SKP1	-
R144.1	YBL063W, YEL061C	KIP1, CIN8	-
C53A5.3	YNL330C	RPD3	ENSG00000171720
F57B9.4	YNR041C	COQ2	-
JC8.10	YIL002C, YNL106C, YOR109W	INP51, INP53, INP52	ENSG00000159082
F58A4.4	YIR008C	PRI1	-
C49H3.11	YGL123W	RPS2	-
R01H2.3	YCR099C, YIL173W, YJL222W, YNR065C, YCR100C, YBL017C, YCR101C, YNR066C	VTH2, VTH1, PEP1	-
F28H1.3	YOR335C	ALA1	-
W02B12.7	YPR141C	KAR3	ENSG00000204197
F27D9.1	YDR164C	SEC1	-
T07A9.10	YDR164C	SEC1	-
ZK1086.1	YHR001W, YKR003W	OSH6, OSH7	-
H02I12.7	YDR225W	HTA1	-
T05H4.6	YBR143C	SUP45	-
B0513.9	YOR327C, YAL030W	SNC2, SNC1	ENSG00000117533
F54C9.8	YLL013C	PUF3	ENSG00000055917,ENSG00000134644
F39H2.2	YDR304C, YHR057C	CPR5, CPR2	-
K12G11.4	YMR083W, YMR303C, YOL086C, YBR145W	ADH3, ADH2, ADH1, ADH5	-
F15D4.1	YPL082C	MOT1	-
Y39A3CR.4	YJR135W-A	TIM8	ENSG00000126953
F46A9.5	YDR328C	SKP1	-
B0035.7	YDR225W	HTA1	-
Y50D7A.6	YBL063W, YEL061C	KIP1, CIN8	-
F08F8.8	YHL031C	GOS1	-
ZK1307.6	YGL003C	CDH1	-
R17.2	YAL021C	CCR4	-
T10C6.12	YDR225W	HTA1	-
F21H12.5	YLL013C	PUF3	ENSG00000055917,ENSG00000134644
T01H8.1	YHR205W, YKL126W, YMR104C	YPK2, YPK1, SCH9	-
H12I13.4	YLL013C	PUF3	ENSG00000055917,ENSG00000134644
C30G12.7	YLL013C	PUF3	ENSG00000055917,ENSG00000134644
B0244.8	YCR099C, YIL173W, YJL222W, YNR065C, YCR100C, YBL017C, YCR101C, YNR066C	VTH2, VTH1, PEP1	-
C14A4.1	YJR070C	LIA1	-
Y77E11A.13	YLR208W	SEC13	-
C04G6.3	YKR031C	SPO14	-
C37A2.4	YGR109C, YDL155W, YPR119W, YGR108W, YLR210W, YPR120C	CLB3, CLB2, CLB1, CLB6, CLB5, CLB4	ENSG00000175305
C07E3.2	YOR206W	NOC2	-
Y25C1A.5	YDR238C	SEC26	ENSG00000129083
B0414.7	YCR073C, YNR031C	SSK22, SSK2	-
C27H6.8	YER156C	-	-
C30H6.7	YNL071W	LAT1	-
Y97E10AR.5	YGL070C	RPB9	-
W10G6.2	YHR205W, YKL126W, YMR104C	YPK2, YPK1, SCH9	ENSG00000104205,ENSG00000105221
C26D10.1	YGL097W	SRM1	-
Y46G5A.5	YPR113W	PIS1	-
F56B3.12	YDR328C	SKP1	-
ZK177.6	YGL003C	CDH1	-
F54C9.2	YNL209W	SSB2	ENSG00000155304
Y53C12A.1	YJL187C	SWE1	-
Y54E10A.3	YLR043C, YGR209C	TRX2, TRX1	ENSG00000091164
Y47C4A.1	YER017C, YMR089C	YTA12, AFG3	-
Y18D10A.25	YNL135C	FPR1	-
Y116A8C.12	YDL137W	ARF2	-
R05D3.11	YJL168C	SET2	-
F54C4.2	YGR063C	SPT4	-
C26E6.12	YHR168W	MTG2	-
M02B7.3	YBL063W, YEL061C	KIP1, CIN8	-
F57B9.5	YBR247C	ENP1	-
Y108F1.1	YER017C, YMR089C	YTA12, AFG3	-
Y60A3A.13	YPR047W	MSF1	-
C10G11.8	YDL007W	RPT2	-
D2063.1	YMR083W, YMR303C, YOL086C, YBR145W	ADH3, ADH2, ADH1, ADH5	-
F22B3.4	YKL104C, YMR085W	GFA1	ENSG00000198380
C46A5.9	YHR158C, YGR238C	KEL1, KEL2	-
F07C3.4	YGL097W	SRM1	-
Y47D9A.1	YDL055C	PSA1	-
T25B9.10	YIL002C, YNL106C, YOR109W	INP51, INP53, INP52	-
F36A2.2	YML080W	DUS1	-
ZK593.7	YNL147W	LSM7	-
Y41D4A.4	YDR107C, YLR083C	TMN2, EMP70	-
F20C5.2	YBL063W, YEL061C	KIP1, CIN8	-
R08C7.2	YNR048W, YNL323W, YCR094W	LEM3, CDC50	ENSG00000112697
R12H7.5	YDR328C	SKP1	-
F55F8.2	YBR142W	MAK5	ENSG00000089737
Y116A8C.36	YBL047C	EDE1	ENSG00000198399
M01E5.2	YHR168W	MTG2	-
R151.7	YMR186W	HSC82	-
C46F4.2	YMR246W, YOR317W, YIL009W	FAA4, FAA1, FAA3	ENSG00000068366,ENSG00000123983
T05C3.5	YNL064C	YDJ1	ENSG00000069345
M28.5	YEL026W	SNU13	-
C27H6.2	YDR190C	RVB1	-
M01E11.6	YPR141C	KAR3	-
C43E11.3	YJL168C	SET2	ENSG00000181555
C12D8.10	YHR205W, YKL126W, YMR104C	YPK2, YPK1, SCH9	ENSG00000104205,ENSG00000105221
F53E4.1	YHR158C, YGR238C	KEL1, KEL2	-
Y73B3B.1	YDR129C	SAC6	ENSG00000102024
R12H7.3	YDR328C	SKP1	-
F07A11.2	YKL104C, YMR085W	GFA1	ENSG00000198380
Y43F4B.3	YJL168C	SET2	-
Y47D7A.8	YDR328C	SKP1	-
C29E4.8	YDR226W	ADK1	ENSG00000004455
F18A1.5	YAR007C	RFA1	-
W08E12.7	YBL091C	MAP2	ENSG00000170515
F56E3.3	YBL063W, YEL061C	KIP1, CIN8	-
F23H12.1	YOR327C, YAL030W	SNC2, SNC1	ENSG00000117533
B0336.2	YDL137W	ARF2	-
C42C1.5	YDL055C	PSA1	-
C54G4.1	YHR205W, YKL126W, YMR104C	YPK2, YPK1, SCH9	-
C04C3.3	YBR221C	PDB1	-
Y56A3A.20	YNR052C	POP2	ENSG00000198791,ENSG00000155508
T08G11.1	YLL040C	VPS13	-

## Sheet: tab3 FBF and PUM2 shared
Worm locus ID	Worm gene name	Human ortholog Ensembl IDs	PUM2 target HGNC symbol
Y47G6A.10	spg-7	ENSG00000136758	YME1L1
F32D1.1	figl-1	ENSG00000182263,ENSG00000021574	FIGN, SPAST
ZK287.5	rbx-1	ENSG00000087495	PHACTR3
Y69A2AR.6	vamp-7	ENSG00000117533	VAMP4
F43G6.6	jmjd-1.1	ENSG00000172943	PHF8
T19B10.8	T19B10.8	ENSG00000197121	PGAP1
Y104H12BR.1	plst-1	ENSG00000102024	PLS3
Y105E8B.3	riok-2	ENSG00000058729	RIOK2
C43E11.9	C43E11.9	ENSG00000132603	NIP7
F36F2.4	syx-7	ENSG00000117758	STX12
F44B9.4	cit-1.1	ENSG00000082258	CCNT2
Y17G7B.15	cnt-1	ENSG00000151693,ENSG00000114331,ENSG00000153317,ENSG00000139436	ASAP2, ACAP2, GIT2, ASAP1
C14B9.7	rpl-21	ENSG00000122026	RPL21
C45B2.7	ptr-4	ENSG00000165186	PTCHD1
F01F1.9	dnpp-1	ENSG00000123992	DNPEP
R05D3.12	R05D3.12	ENSG00000131747	TOP2A
F41E6.13	atg-18	ENSG00000157954	WIPI2
Y57G11C.13	arl-8	ENSG00000143862	ARL8A
ZK637.11	cdc-25.3	ENSG00000164045	CDC25A
R04A9.4	ife-2	ENSG00000151247	EIF4E
F31D4.3	fkb-6	ENSG00000096060,ENSG00000004478	FKBP4, FKBP5
C56C10.3	vps-32.1	ENSG00000164695	CHMP4C
R07E4.4	mig-23	ENSG00000198018	ENTPD7
ZK632.8	arl-5	ENSG00000162980,ENSG00000165997	ARL5A, ARL5B
C24B5.2	spas-1	ENSG00000021574	SPAST
Y18D10A.7	ptr-17	ENSG00000165186	PTCHD1
F22B5.7	zyg-9	ENSG00000175216	CKAP5
ZK1058.5	ZK1058.5	ENSG00000123600	METTL8
F46F2.2	kin-20	ENSG00000213923,ENSG00000113712,ENSG00000141551	CSNK1D, CSNK1E, CSNK1A1
F07B7.5	his-49	ENSG00000132475	H3F3B
K07C5.8	cash-1	ENSG00000196792,ENSG00000090372	STRN4, STRN3
Y54E2A.4	Y54E2A.4	ENSG00000112249	ASCC3
Y65B4BR.3	ptr-21	ENSG00000165186	PTCHD1
F37C12.7	acs-4	ENSG00000068366,ENSG00000123983	ACSL3, ACSL4
F29D10.4	hum-1	ENSG00000157483	MYO1E
K12H4.4	K12H4.4	ENSG00000129128	SPCS3
R09B3.2	R09B3.2	ENSG00000101811	CSTF2
F43C1.2	mpk-1	ENSG00000100030	MAPK1
F10G7.3	unc-85	ENSG00000111875	ASF1A
R05H5.2	cdc-25.4	ENSG00000164045	CDC25A
Y48B6A.14	hmg-1.1	ENSG00000103460,ENSG00000092203	TOX4, TOX3
C04A2.1	tbc-6	ENSG00000139835,ENSG00000087495	GRTP1, PHACTR3
F22B3.2	his-63	ENSG00000132475	H3F3B
C23H4.6	C23H4.6	ENSG00000163029	SMC6
E03G2.2	mrp-3	ENSG00000114770	ABCC5
R02C2.2	kin-34	ENSG00000149554	CHEK1
R09H10.4	ptr-14	ENSG00000165186	PTCHD1
F18A11.1	puf-6	ENSG00000055917,ENSG00000134644	PUM2, PUM1
R53.6	psf-1	ENSG00000101003	GINS1
F18C5.2	wrn-1	ENSG00000165392	WRN
Y75B8A.26	mrp-8	ENSG00000114770	ABCC5
F12F6.6	sec-24.1	ENSG00000150961	SEC24D
W08D2.5	catp-6	ENSG00000133657	ATP13A3
R166.3	R166.3	ENSG00000144233	AMMECR1L
F52A8.5	F52A8.5	ENSG00000140905	GCSH
R144.2	pcf-11	ENSG00000165494	PCF11
F28B3.9	acl-11	ENSG00000155189	AGPAT5
C09G9.6	oma-1	ENSG00000152518,ENSG00000185650	ZFP36L1, ZFP36L2
ZK632.6	cnx-1	ENSG00000127022	CANX
B0273.2	puf-7	ENSG00000055917,ENSG00000134644	PUM2, PUM1
Y47G6A.11	msh-6	ENSG00000113318	MSH3
T10H9.4	snb-1	ENSG00000117533	VAMP4
T06E6.2	cyb-3	ENSG00000145386	CCNA2
ZC168.4	cyb-1	ENSG00000145386	CCNA2
R06C1.1	hda-3	ENSG00000171720	HDAC3
C54A12.1	ptr-6	ENSG00000165186	PTCHD1
F32H2.1	snpc-4	ENSG00000118513	MYB
T12F5.4	lin-59	ENSG00000116539	ASH1L
Y48G1BL.2	atm-1	ENSG00000149311	ATM
F26H9.6	rab-5	ENSG00000124209,ENSG00000111540	RAB22A, RAB5B
T27E9.3	cdk-5	ENSG00000123374	CDK2
ZK328.5	npp-10	ENSG00000110713	NUP98
T02C12.1	hum-5	ENSG00000157483	MYO1E
K06H7.4	grp-1	ENSG00000108669,ENSG00000008256	CYTH1, CYTH3
C03D6.5	asfl-1	ENSG00000111875	ASF1A
F20B6.3	mrp-6	ENSG00000114770	ABCC5
C26E6.3	ntl-9	ENSG00000144580	RQCD1
T19A5.2	gck-1	ENSG00000102572	STK24
T09A5.2	klp-3	ENSG00000204197	KIFC1
Y32H12A.7	Y32H12A.7	ENSG00000133597	ADCK2
R09B3.1	exo-3	ENSG00000100823	APEX1
T22F3.3	T22F3.3	ENSG00000100504	PYGL
F25H2.11	tct-1	ENSG00000087495	PHACTR3
C25D7.7	rap-2	ENSG00000123728	RAP2C
T01G9.5	mei-1	ENSG00000102781	KATNAL1
Y76A2B.3	acs-5	ENSG00000068366,ENSG00000123983	ACSL3, ACSL4
F18C12.1	che-3	ENSG00000105877	DNAH11
B0348.6	ife-3	ENSG00000151247	EIF4E
ZC410.2	mppb-1	ENSG00000105819	PMPCB
T21H3.2	ptr-16	ENSG00000165186	PTCHD1
Y59H11AR.2	catp-7	ENSG00000133657	ATP13A3
Y55B1AL.3	helq-1	ENSG00000051341	POLQ
Y47D3A.26	smc-3	ENSG00000108055	SMC3
F15H10.3	apc-10	ENSG00000164162	ANAPC10
R107.4	ikke-1	ENSG00000213341,ENSG00000183735	CHUK, TBK1
F32B6.3	F32B6.3	ENSG00000165630	PRPF18
C33H5.14	ntp-1	ENSG00000198018	ENTPD7
C25A1.3	tag-72	ENSG00000101654	RNMT
W03A3.2	polq-1	ENSG00000051341	POLQ
W06D4.6	rad-54	ENSG00000197275	RAD54B
C02F4.1	ced-5	ENSG00000134516	DOCK2
F22D6.3	nars-1	ENSG00000134440	NARS
K12C11.2	smo-1	ENSG00000184900,ENSG00000188612,ENSG00000087495	SUMO3, SUMO2, PHACTR3
Y62E10A.8	mau-8	ENSG00000136940	PDCL
Y55F3AR.2	Y55F3AR.2	ENSG00000091164	TXNL1
Y48B6A.3	xrn-2	ENSG00000114127	XRN1
F31F6.5	daf-6	ENSG00000165186	PTCHD1
R06C7.8	bub-1	ENSG00000169679	BUB1
Y82E9BR.15	elc-1	ENSG00000087495	PHACTR3
Y110A7A.5	mtm-1	ENSG00000171100,ENSG00000063601	MTM1, MTMR1
Y43E12A.1	cyb-2.1	ENSG00000145386	CCNA2
K02F3.2	K02F3.2	ENSG00000004864,ENSG00000115840	SLC25A13, SLC25A12
C26E6.4	rpb-2	ENSG00000047315	POLR2B
C41C4.6	ulp-4	ENSG00000112701	SENP6
F59A2.1	npp-9	ENSG00000153201	RANBP2
C05D9.5	ife-4	ENSG00000087495	PHACTR3
F46E10.8	ubh-1	ENSG00000154277	UCHL1
K08D10.3	rnp-3	ENSG00000125870	SNRPB2
F59G1.5	ptp-2	ENSG00000111679	PTPN6
Y73B6BL.38	puf-11	ENSG00000055917,ENSG00000134644	PUM2, PUM1
F53F4.5	fmo-4	ENSG00000087495,ENSG00000076258	PHACTR3, FMO4
B0511.6	B0511.6	ENSG00000088205	DDX18
W09C5.5	dkf-1	ENSG00000115825	PRKD3
Y49E10.11	tat-1	ENSG00000068650,ENSG00000101974,ENSG00000143515	ATP8B2, ATP11C, ATP11A
T07H8.6	ptr-15	ENSG00000165186	PTCHD1
D1044.8	nekl-4	ENSG00000087495	PHACTR3
T06D8.6	cchl-1	ENSG00000004961	HCCS
K07C10.1	ptr-13	ENSG00000165186	PTCHD1
T21H3.3	cmd-1	ENSG00000198668	CALM1
H26D21.2	msh-2	ENSG00000095002	MSH2
ZK131.3	his-9	ENSG00000132475	H3F3B
Y47D3A.16	rsks-1	ENSG00000104205,ENSG00000105221	AKT2, SGK3
F38B7.1	ccch-1	ENSG00000152518,ENSG00000185650	ZFP36L1, ZFP36L2
Y82E9BR.3	Y82E9BR.3	ENSG00000154518	ATP5G3
Y6B3A.1	agef-1	ENSG00000066777,ENSG00000124198	ARFGEF1, ARFGEF2
Y46G5A.4	snrp-200	ENSG00000112249	ASCC3
F57C12.4	mrp-2	ENSG00000114770	ABCC5
F35G12.3	sel-5	ENSG00000138756	BMP2K
T04A11.6	him-6	ENSG00000165392	WRN
ZC513.6	oma-2	ENSG00000152518,ENSG00000185650	ZFP36L1, ZFP36L2
C07H6.5	cgh-1	ENSG00000110367	DDX6
T25E12.4	dkf-2	ENSG00000115825	PRKD3
ZK616.4	swsn-6	ENSG00000136518	ACTL6A
Y51H4A.3	rho-1	ENSG00000067560	RHOA
ZK256.1	pmr-1	ENSG00000196296	ATP2A1
W03D2.4	pcn-1	ENSG00000132646	PCNA
C41D7.2	ptr-3	ENSG00000165186	PTCHD1
D1025.2	gcsh-1	ENSG00000140905	GCSH
M7.1	let-70	ENSG00000131508,ENSG00000072401	UBE2D2, UBE2D1
F29B9.1	F29B9.1	ENSG00000203791	METTL10
F45E1.6	his-71	ENSG00000132475	H3F3B
F28F8.3	lsm-5	ENSG00000106355	LSM5
B0491.1	B0491.1	ENSG00000143315	PIGM
K02F3.12	K02F3.12	ENSG00000165392	WRN
F21G4.2	mrp-4	ENSG00000114770	ABCC5
Y67D2.1	rep-1	ENSG00000188419	CHM
F53A2.6	ife-1	ENSG00000151247	EIF4E
R10E11.3	usp-46	ENSG00000109189,ENSG00000152484	USP12, USP46
Y18D10A.19	fkb-2	ENSG00000096060,ENSG00000004478	FKBP4, FKBP5
H31G24.4	cyb-2.2	ENSG00000145386	CCNA2
T01B7.3	rab-21	ENSG00000080371	RAB21
ZK856.1	cul-5	ENSG00000166266	CUL5
Y51A2D.4	hmit-1.1	ENSG00000151229	SLC2A13
T10C6.13	his-2	ENSG00000132475	H3F3B
F28H6.1	akt-2	ENSG00000104205,ENSG00000105221	AKT2, SGK3
Y66D12A.23	nars-2	ENSG00000134440	NARS
F27D4.5	tag-173	ENSG00000083123	BCKDHB
F35H8.5	exc-7	ENSG00000066044	ELAVL1
Y38F1A.3	ptr-18	ENSG00000165186	PTCHD1
C24B5.3	ptr-1	ENSG00000165186	PTCHD1
W06B11.2	puf-9	ENSG00000055917,ENSG00000134644	PUM2, PUM1
K07E3.7	catp-5	ENSG00000133657	ATP13A3
Y39H10A.7	chk-1	ENSG00000149554	CHEK1
F14B4.3	rpoa-2	ENSG00000125630	POLR1B
Y39A1B.2	ptr-19	ENSG00000165186	PTCHD1
F56D2.1	ucr-1	ENSG00000105819	PMPCB
F29B9.2	jmjd-1.2	ENSG00000172943	PHF8
Y46G5A.1	tbc-17	ENSG00000148429,ENSG00000189375	USP6NL, TBC1D28
H06H21.10	tat-2	ENSG00000068650,ENSG00000101974,ENSG00000143515	ATP8B2, ATP11C, ATP11A
Y39G8B.5	Y39G8B.5	ENSG00000213341,ENSG00000183735	CHUK, TBK1
W08G11.4	pptr-1	ENSG00000078304,ENSG00000066027	PPP2R5A, PPP2R5C
F57C9.1	F57C9.1	ENSG00000160209	PDXK
F13G3.5	ttx-7	ENSG00000133731	IMPA1
K03E5.3	cdk-2	ENSG00000123374	CDK2
C01G10.10	C01G10.10	ENSG00000128694	OSGEPL1
Y40G12A.2	ubh-2	ENSG00000154277	UCHL1
Y18D10A.13	pad-1	ENSG00000083097	DOPEY1
D1022.7	aka-1	ENSG00000039319	ZFYVE16
T08D2.8	T08D2.8	ENSG00000175216	CKAP5
R06C1.4	R06C1.4	ENSG00000101811	CSTF2
C49H3.10	xpo-3	ENSG00000184575	XPOT
F44F4.4	ptr-8	ENSG00000165186	PTCHD1
T01G1.3	sec-31	ENSG00000138674	SEC31A
F17E9.10	his-32	ENSG00000132475	H3F3B
C32E8.11	ubr-1	ENSG00000024048	UBR2
T24H10.1	T24H10.1	ENSG00000187735	TCEA1
C47D12.8	xpf-1	ENSG00000175595	ERCC4
F20C5.4	F20C5.4	ENSG00000112697	TMEM30A
F01F1.7	ddx-23	ENSG00000118197	DDX59
M02B7.5	bris-1	ENSG00000144711,ENSG00000164117	IQSEC1, FBXO8
F39B2.10	dnj-12	ENSG00000069345	DNAJA2
T21E12.4	dhc-1	ENSG00000105877	DNAH11
F09G2.4	cpsf-2	ENSG00000165934	CPSF2
Y57E12AL.1	Y57E12AL.1	ENSG00000111897	SERINC1
F08G2.3	his-42	ENSG00000132475	H3F3B
W01B6.9	ndc-80	ENSG00000080986	NDC80
ZK1251.1	htas-1	ENSG00000099284	H2AFY2
E04D5.1	E04D5.1	ENSG00000144895	EIF2A
F57C12.5	mrp-1	ENSG00000114770	ABCC5
ZK131.7	his-13	ENSG00000132475	H3F3B
F55F8.1	ptr-10	ENSG00000165186	PTCHD1
Y41D4B.12	set-23	ENSG00000143379,ENSG00000087495	SETDB1, PHACTR3
ZK675.2	rev-1	ENSG00000135945	REV1
Y108G3AL.1	cul-3	ENSG00000036257	CUL3
F14F4.3	mrp-5	ENSG00000114770	ABCC5
Y51H1A.4	ing-3	ENSG00000168395,ENSG00000071243	ING5, ING3
Y45F10A.2	puf-3	ENSG00000055917,ENSG00000134644	PUM2, PUM1
F18E2.3	scc-3	ENSG00000118007,ENSG00000101972	STAG2, STAG1
M03C11.5	ymel-1	ENSG00000136758	YME1L1
Y80D3A.7	ptr-22	ENSG00000165186	PTCHD1
R11H6.2	R11H6.2	ENSG00000111897	SERINC1
C30B5.2	C30B5.2	ENSG00000104660	LEPROTL1
F32A11.6	moe-3	ENSG00000152518,ENSG00000185650	ZFP36L1, ZFP36L2
F09F7.3	rpc-2	ENSG00000047315	POLR2B
C53A5.3	hda-1	ENSG00000171720	HDAC3
K06A5.7	cdc-25.1	ENSG00000164045	CDC25A
Y43F8C.12	mrp-7	ENSG00000114770	ABCC5
F54E12.1	his-55	ENSG00000132475	H3F3B
JC8.10	unc-26	ENSG00000159082	SYNJ1
F28B3.7	him-1	ENSG00000077935,ENSG00000072501	SMC1A, SMC1B
Y66D12A.15	xpb-1	ENSG00000163161	ERCC3
K11D9.2	sca-1	ENSG00000196296	ATP2A1
Y116A8C.42	snr-1	ENSG00000100028	SNRPD3
W02B12.7	klp-17	ENSG00000204197	KIFC1
M01F1.5	hmit-1.3	ENSG00000151229	SLC2A13
F55G1.2	his-59	ENSG00000132475	H3F3B
Y57A10A.30	ife-5	ENSG00000151247	EIF4E
E03A3.3	his-69	ENSG00000132475	H3F3B
Y39G8C.1	xrn-1	ENSG00000114127	XRN1
C13G3.3	pptr-2	ENSG00000078304,ENSG00000066027	PPP2R5A, PPP2R5C
B0513.9	vamp-8	ENSG00000117533	VAMP4
F54C9.8	puf-5	ENSG00000055917,ENSG00000134644	PUM2, PUM1
Y48G1C.12	Y48G1C.12	ENSG00000164162	ANAPC10
F44B9.3	cit-1.2	ENSG00000082258	CCNT2
Y39A3CR.4	ddp-1	ENSG00000126953	TIMM8A
D1054.3	D1054.3	ENSG00000165416	SUGT1
C44E4.4	C44E4.4	ENSG00000138385	SSB
F29G9.3	aps-1	ENSG00000106367,ENSG00000152056	AP1S1, AP1S3
Y43D4A.6	Y43D4A.6	ENSG00000149554	CHEK1
Y54E5B.3	let-49	ENSG00000087495	PHACTR3
Y111B2A.11	epc-1	ENSG00000120616	EPC1
F17C11.10	F17C11.10	ENSG00000198554	WDHD1
Y53F4B.42	Y53F4B.42	ENSG00000123600	METTL8
K06C4.13	his-27	ENSG00000132475	H3F3B
K10B2.1	lin-23	ENSG00000072803	FBXW11
F56C11.2	ptr-11	ENSG00000165186	PTCHD1
ZK1127.7	cin-4	ENSG00000131747	TOP2A
B0379.4	scpl-1	ENSG00000144579	CTDSP1
F21H12.5	fbf-2	ENSG00000055917,ENSG00000134644	PUM2, PUM1
H12I13.4	fbf-1	ENSG00000055917,ENSG00000134644	PUM2, PUM1
C37C3.3	vps-32.2	ENSG00000164695	CHMP4C
C30G12.7	puf-8	ENSG00000055917,ENSG00000134644	PUM2, PUM1
ZK131.2	his-25	ENSG00000132475	H3F3B
C32E8.8	ptr-2	ENSG00000165186	PTCHD1
C37A2.4	cye-1	ENSG00000175305	CCNE2
ZK686.3	ZK686.3	ENSG00000104723	TUSC3
Y38A8.3	ulp-2	ENSG00000112701	SENP6
C38D4.5	tag-325	ENSG00000075884,ENSG00000165322,ENSG00000087495	ARHGAP15, ARHGAP12, PHACTR3
Y39A1B.3	dpy-28	ENSG00000010292	NCAPD2
Y25C1A.5	copb-1	ENSG00000129083	COPB1
C13B4.2	usp-14	ENSG00000101557	USP14
F54G8.5	ptr-9	ENSG00000165186	PTCHD1
W10G6.2	sgk-1	ENSG00000104205,ENSG00000105221	AKT2, SGK3
K08D10.4	rnp-2	ENSG00000125870	SNRPB2
F54C9.2	stc-1	ENSG00000155304	HSPA13
Y54E10A.3	txl-1	ENSG00000091164	TXNL1
B0035.10	his-45	ENSG00000132475	H3F3B
R07G3.1	cdc-42	ENSG00000136238,ENSG00000087495	PHACTR3, RAC1
C10H11.9	let-502	ENSG00000067900	ROCK1
R13H8.1	daf-16	ENSG00000118689,ENSG00000150907	FOXO3, FOXO1
T06A10.4	lsy-13	ENSG00000168395,ENSG00000071243	ING5, ING3
Y47G6A.23	lpd-3	ENSG00000138688	KIAA1109
Y65B4BL.5	acs-13	ENSG00000068366,ENSG00000123983	ACSL3, ACSL4
Y53F4B.28	ptr-20	ENSG00000165186	PTCHD1
F45F2.13	his-6	ENSG00000132475	H3F3B
ZK1128.8	vps-29	ENSG00000111237	VPS29
F22B3.4	gfat-2	ENSG00000198380	GFPT1
C53C11.3	ptr-5	ENSG00000165186	PTCHD1
Y51A2D.5	hmit-1.2	ENSG00000151229	SLC2A13
W05B10.1	his-74	ENSG00000132475	H3F3B
F53A3.2	polh-1	ENSG00000170734	POLH
T05G5.3	cdk-1	ENSG00000123374	CDK2
F16B4.8	cdc-25.2	ENSG00000164045	CDC25A
R08C7.2	chat-1	ENSG00000112697	TMEM30A
F26B1.2	F26B1.2	ENSG00000165119	HNRNPK
C03C10.1	kin-19	ENSG00000213923,ENSG00000113712,ENSG00000141551	CSNK1D, CSNK1E, CSNK1A1
K12D12.1	top-2	ENSG00000131747	TOP2A
K04F10.4	bli-4	ENSG00000099139	PCSK5
F55F8.2	F55F8.2	ENSG00000089737	DDX24
Y40G12A.1	ubh-3	ENSG00000154277	UCHL1
Y116A8C.36	itsn-1	ENSG00000198399	ITSN2
DC2.7	kin-33	ENSG00000149554	CHEK1
R02C2.6	R02C2.6	ENSG00000149554	CHEK1
ZC404.9	gck-2	ENSG00000011566	MAP4K3
Y24D9A.4	rpl-7A	ENSG00000087495	PHACTR3
Y116A8C.13	Y116A8C.13	ENSG00000197275	RAD54B
T06E4.3	atl-1	ENSG00000175054	ATR
F53F10.5	npp-11	ENSG00000110713	NUP98
T08B2.10	rps-17	ENSG00000087495	PHACTR3
F54D5.14	smc-6	ENSG00000163029	SMC6
Y47G6A.29	Y47G6A.29	ENSG00000138688	KIAA1109
Y71H2AM.1	Y71H2AM.1	ENSG00000128694	OSGEPL1
C46F4.2	acs-17	ENSG00000068366,ENSG00000123983	ACSL3, ACSL4
T05C3.5	dnj-19	ENSG00000069345	DNAJA2
R09B3.3	R09B3.3	ENSG00000101811	CSTF2
C43E11.3	met-1	ENSG00000181555	SETD2
C12D8.10	akt-1	ENSG00000104205,ENSG00000105221	AKT2, SGK3
Y73B3B.1	Y73B3B.1	ENSG00000102024	PLS3
K07A3.2	ptr-12	ENSG00000165186	PTCHD1
F07A11.2	gfat-1	ENSG00000198380	GFPT1
K06C4.5	his-17	ENSG00000132475	H3F3B
C25A1.10	dao-5	ENSG00000166197	NOLC1
F42A9.2	lin-49	ENSG00000096070,ENSG00000100425	BRPF3, BRD1
K08H10.9	trpp-6	ENSG00000182400	TRAPPC6B
C07H6.1	lig-4	ENSG00000174405	LIG4
C29E4.8	let-754	ENSG00000004455	AK2
W08E12.7	W08E12.7	ENSG00000170515	PA2G4
F23H12.1	snb-2	ENSG00000117533	VAMP4
ZK270.1	ptr-23	ENSG00000165186	PTCHD1
R102.4	R102.4	ENSG00000087495	PHACTR3
F40F8.9	lsm-1	ENSG00000175324	LSM1
ZK945.2	pas-7	ENSG00000100567	PSMA3
Y39E4B.7	dhhc-8	ENSG00000156599	ZDHHC5
R02C2.1	R02C2.1	ENSG00000149554	CHEK1
Y56A3A.20	ccf-1	ENSG00000198791,ENSG00000155508	CNOT8, CNOT7

## Sheet: tab4 FBF, yeast, human shared
Worm locus ID	Worm gene name	Yeast Ensembl ID	Yeast gene name	Human ortholog Ensembl IDs
Y47G6A.10	spg-7	YER017C, YMR089C	YTA12, AFG3	ENSG00000136758
F32D1.1	figl-1	YER047C, YPL074W	SAP1, YTA6	ENSG00000182263,ENSG00000021574
Y69A2AR.6	vamp-7	YOR327C, YAL030W	SNC2, SNC1	ENSG00000117533
Y104H12BR.1	plst-1	YDR129C	SAC6	ENSG00000102024
C43E11.9	C43E11.9	YPL211W	NIP7	ENSG00000132603
C14B9.7	rpl-21	YBR191W, YPL079W	RPL21A, RPL21B	ENSG00000122026
F31D4.3	fkb-6	YNL135C	FPR1	ENSG00000096060,ENSG00000004478
ZK632.8	arl-5	YDL137W	ARF2	ENSG00000162980,ENSG00000165997
C24B5.2	spas-1	YER047C, YPL074W	SAP1, YTA6	ENSG00000021574
F37C12.7	acs-4	YMR246W, YOR317W, YIL009W	FAA4, FAA1, FAA3	ENSG00000068366,ENSG00000123983
F18A11.1	puf-6	YLL013C	PUF3	ENSG00000055917,ENSG00000134644
F52A8.5	F52A8.5	YAL044C	GCV3	ENSG00000140905
B0273.2	puf-7	YLL013C	PUF3	ENSG00000055917,ENSG00000134644
Y47G6A.11	msh-6	YDR097C	MSH6	ENSG00000113318
T10H9.4	snb-1	YOR327C, YAL030W	SNC2, SNC1	ENSG00000117533
T06E6.2	cyb-3	YGR109C, YDL155W, YPR119W, YGR108W, YLR210W, YPR120C	CLB3, CLB2, CLB1, CLB6, CLB5, CLB4	ENSG00000145386
ZC168.4	cyb-1	YGR109C, YDL155W, YPR119W, YGR108W, YLR210W, YPR120C	CLB3, CLB2, CLB1, CLB6, CLB5, CLB4	ENSG00000145386
R06C1.1	hda-3	YNL330C	RPD3	ENSG00000171720
F32H2.1	snpc-4	YKR099W	BAS1	ENSG00000118513
T12F5.4	lin-59	YJL168C	SET2	ENSG00000116539
K06H7.4	grp-1	YDR170C	SEC7	ENSG00000108669,ENSG00000008256
C26E6.3	ntl-9	YNL288W	CAF40	ENSG00000144580
T09A5.2	klp-3	YPR141C	KAR3	ENSG00000204197
ZC410.2	mppb-1	YLR163C	MAS1	ENSG00000105819
R107.4	ikke-1	YCR073C, YNR031C	SSK22, SSK2	ENSG00000213341,ENSG00000183735
Y55F3AR.2	Y55F3AR.2	YLR043C, YGR209C	TRX2, TRX1	ENSG00000091164
R06C7.8	bub-1	YGR188C, YJL013C	BUB1, MAD3	ENSG00000169679
Y43E12A.1	cyb-2.1	YGR109C, YDL155W, YPR119W, YGR108W, YLR210W, YPR120C	CLB3, CLB2, CLB1, CLB6, CLB5, CLB4	ENSG00000145386
F59A2.1	npp-9	YDR002W	YRB1	ENSG00000153201
Y73B6BL.38	puf-11	YLL013C	PUF3	ENSG00000055917,ENSG00000134644
B0511.6	B0511.6	YMR290C	HAS1	ENSG00000088205
T06D8.6	cchl-1	YAL039C	CYC3	ENSG00000004961
Y47D3A.16	rsks-1	YHR205W, YKL126W, YMR104C	YPK2, YPK1, SCH9	ENSG00000104205,ENSG00000105221
Y6B3A.1	agef-1	YDR170C	SEC7	ENSG00000066777,ENSG00000124198
F35G12.3	sel-5	YBR059C, YIL095W, YNL020C	AKL1, PRK1, ARK1	ENSG00000138756
C07H6.5	cgh-1	YDL160C	DHH1	ENSG00000110367
Y51H4A.3	rho-1	YPR165W	RHO1	ENSG00000067560
W03D2.4	pcn-1	YBR088C	POL30	ENSG00000132646
D1025.2	gcsh-1	YAL044C	GCV3	ENSG00000140905
B0491.1	B0491.1	YJR013W	GPI14	ENSG00000143315
Y18D10A.19	fkb-2	YNL135C	FPR1	ENSG00000096060,ENSG00000004478
H31G24.4	cyb-2.2	YGR109C, YDL155W, YPR119W, YGR108W, YLR210W, YPR120C	CLB3, CLB2, CLB1, CLB6, CLB5, CLB4	ENSG00000145386
F28H6.1	akt-2	YHR205W, YKL126W, YMR104C	YPK2, YPK1, SCH9	ENSG00000104205,ENSG00000105221
F27D4.5	tag-173	YBR221C	PDB1	ENSG00000083123
W06B11.2	puf-9	YLL013C	PUF3	ENSG00000055917,ENSG00000134644
F14B4.3	rpoa-2	YPR010C	RPA135	ENSG00000125630
F56D2.1	ucr-1	YLR163C	MAS1	ENSG00000105819
Y39G8B.5	Y39G8B.5	YCR073C, YNR031C	SSK22, SSK2	ENSG00000213341,ENSG00000183735
C49H3.10	xpo-3	YKL205W	LOS1	ENSG00000184575
F20C5.4	F20C5.4	YNR048W, YNL323W, YCR094W	LEM3, CDC50	ENSG00000112697
M02B7.5	bris-1	YDR170C	SEC7	ENSG00000144711,ENSG00000164117
F39B2.10	dnj-12	YNL064C	YDJ1	ENSG00000069345
E04D5.1	E04D5.1	YGR054W	-	ENSG00000144895
Y41D4B.12	set-23	YJL168C	SET2	ENSG00000143379,ENSG00000087495
Y45F10A.2	puf-3	YLL013C	PUF3	ENSG00000055917,ENSG00000134644
M03C11.5	ymel-1	YPR024W	YME1	ENSG00000136758
C53A5.3	hda-1	YNL330C	RPD3	ENSG00000171720
JC8.10	unc-26	YIL002C, YNL106C, YOR109W	INP51, INP53, INP52	ENSG00000159082
W02B12.7	klp-17	YPR141C	KAR3	ENSG00000204197
B0513.9	vamp-8	YOR327C, YAL030W	SNC2, SNC1	ENSG00000117533
F54C9.8	puf-5	YLL013C	PUF3	ENSG00000055917,ENSG00000134644
Y39A3CR.4	ddp-1	YJR135W-A	TIM8	ENSG00000126953
F21H12.5	fbf-2	YLL013C	PUF3	ENSG00000055917,ENSG00000134644
H12I13.4	fbf-1	YLL013C	PUF3	ENSG00000055917,ENSG00000134644
C30G12.7	puf-8	YLL013C	PUF3	ENSG00000055917,ENSG00000134644
C37A2.4	cye-1	YGR109C, YDL155W, YPR119W, YGR108W, YLR210W, YPR120C	CLB3, CLB2, CLB1, CLB6, CLB5, CLB4	ENSG00000175305
Y25C1A.5	copb-1	YDR238C	SEC26	ENSG00000129083
W10G6.2	sgk-1	YHR205W, YKL126W, YMR104C	YPK2, YPK1, SCH9	ENSG00000104205,ENSG00000105221
F54C9.2	stc-1	YNL209W	SSB2	ENSG00000155304
Y54E10A.3	txl-1	YLR043C, YGR209C	TRX2, TRX1	ENSG00000091164
F22B3.4	gfat-2	YKL104C, YMR085W	GFA1	ENSG00000198380
R08C7.2	chat-1	YNR048W, YNL323W, YCR094W	LEM3, CDC50	ENSG00000112697
F55F8.2	F55F8.2	YBR142W	MAK5	ENSG00000089737
Y116A8C.36	itsn-1	YBL047C	EDE1	ENSG00000198399
C46F4.2	acs-17	YMR246W, YOR317W, YIL009W	FAA4, FAA1, FAA3	ENSG00000068366,ENSG00000123983
T05C3.5	dnj-19	YNL064C	YDJ1	ENSG00000069345
C43E11.3	met-1	YJL168C	SET2	ENSG00000181555
C12D8.10	akt-1	YHR205W, YKL126W, YMR104C	YPK2, YPK1, SCH9	ENSG00000104205,ENSG00000105221
Y73B3B.1	Y73B3B.1	YDR129C	SAC6	ENSG00000102024
F07A11.2	gfat-1	YKL104C, YMR085W	GFA1	ENSG00000198380
C29E4.8	let-754	YDR226W	ADK1	ENSG00000004455
W08E12.7	W08E12.7	YBL091C	MAP2	ENSG00000170515
F23H12.1	snb-2	YOR327C, YAL030W	SNC2, SNC1	ENSG00000117533
Y56A3A.20	ccf-1	YNR052C	POP2	ENSG00000198791,ENSG00000155508

## Sheet: tab5 FBF trgts with hum ortho.
Gene name	Locus ID	Ensembl Compara	InParanoid	Homologene	OrthoMCL
wht-7	Y42G9A.6	-	ENSG00000160179,ENSG00000172350	-	-
rpt-2	F29G9.5	ENSG00000100764	ENSG00000100764	ENSG00000100764	ENSG00000100764
hpo-4	T05E11.6	ENSG00000142892	ENSG00000142892	-	ENSG00000142892
tpk-1	ZK637.9	ENSG00000196511	ENSG00000196511	ENSG00000196511	ENSG00000196511
spg-7	Y47G6A.10	-	ENSG00000141385	ENSG00000141385	ENSG00000141385,ENSG00000136758
figl-1	F32D1.1	ENSG00000132436,ENSG00000182263	ENSG00000132436,ENSG00000182263	-	ENSG00000021574,ENSG00000132436
spr-1	D1014.8	-	ENSG00000089902,ENSG00000117625,ENSG00000167771	-	-
apb-1	Y71H2B.10	ENSG00000100280,ENSG00000006125	ENSG00000100280,ENSG00000006125	ENSG00000100280	ENSG00000006125,ENSG00000100280
rbx-1	ZK287.5	ENSG00000100387	ENSG00000100387	ENSG00000087495	ENSG00000100387
ehs-1	ZK1248.3	ENSG00000085832,ENSG00000127527	ENSG00000127527,ENSG00000085832	ENSG00000127527	ENSG00000085832,ENSG00000127527
vamp-7	Y69A2AR.6	ENSG00000118640	ENSG00000117533	-	-
rpc-1	C42D4.8	ENSG00000148606	ENSG00000148606	ENSG00000148606	ENSG00000148606,ENSG00000181222
aars-1	W02B12.6	ENSG00000124608	-	-	-
jmjd-1.1	F43G6.6	ENSG00000006459,ENSG00000172943,ENSG00000197724	ENSG00000172943,ENSG00000197724,ENSG00000006459	-	ENSG00000172943,ENSG00000197724,ENSG00000006459
T19B10.8	T19B10.8	ENSG00000197121	ENSG00000197121	-	-
plst-1	Y104H12BR.1	ENSG00000136167,ENSG00000102024,ENSG00000120756	ENSG00000072110	ENSG00000136167	ENSG00000136167,ENSG00000102024,ENSG00000120756
cln-3.1	F07B10.1	ENSG00000188603	ENSG00000188603	ENSG00000188603	ENSG00000188603
riok-2	Y105E8B.3	ENSG00000058729	ENSG00000058729	-	ENSG00000058729
C43E11.9	C43E11.9	ENSG00000132603	ENSG00000132603	ENSG00000132603	ENSG00000132603
syx-7	F36F2.4	ENSG00000117758,ENSG00000079950	ENSG00000117758,ENSG00000079950	-	ENSG00000079950,ENSG00000117758
fib-1	T01C3.7	ENSG00000105202,ENSG00000188573	ENSG00000105202,ENSG00000188573	ENSG00000105202	ENSG00000105202
his-30	F35H10.1	ENSG00000184825,ENSG00000184348,ENSG00000182611,ENSG00000196787,ENSG00000196747,ENSG00000198374,ENSG00000233224,ENSG00000164508	-	ENSG00000263965	ENSG00000184270,ENSG00000180573,ENSG00000188486,ENSG00000164508,ENSG00000182611,ENSG00000184348,ENSG00000198374,ENSG00000196747,ENSG00000196787,ENSG00000233224,ENSG00000184825,ENSG00000184260,ENSG00000137259,ENSG00000168274,ENSG00000203812,ENSG00000183558,ENSG00000196866,ENSG00000181218
rer-1	F46C5.8	ENSG00000157916	ENSG00000157916	ENSG00000157916	ENSG00000157916
vacl-14	K04G2.6	ENSG00000103043	ENSG00000103043	ENSG00000103043	ENSG00000103043
cit-1.1	F44B9.4	ENSG00000082258,ENSG00000129315	ENSG00000129315,ENSG00000082258	-	ENSG00000082258,ENSG00000129315
cnt-1	Y17G7B.15	ENSG00000131584,ENSG00000114331,ENSG00000072818,ENSG00000088280,ENSG00000151693,ENSG00000153317,ENSG00000108262,ENSG00000139436	ENSG00000114331,ENSG00000131584,ENSG00000072818	ENSG00000114331	ENSG00000072818,ENSG00000114331,ENSG00000131584
nprl-2	F49E8.1	ENSG00000114388	ENSG00000114388	ENSG00000114388	ENSG00000114388
rpl-21	C14B9.7	ENSG00000122026,ENSG00000220793,ENSG00000232429,ENSG00000214760,ENSG00000180662,ENSG00000186244,ENSG00000229585	ENSG00000122026,ENSG00000214760	ENSG00000122026	ENSG00000122026
sep-1	Y47G6A.12	ENSG00000135476	-	-	-
laf-1	Y71H2AM.19	-	ENSG00000215301,ENSG00000067048	-	ENSG00000152670,ENSG00000067048,ENSG00000215301
ptr-4	C45B2.7	ENSG00000182077,ENSG00000165186,ENSG00000178729,ENSG00000244694	-	-	-
cdk-7	Y39G10AL.3	ENSG00000134058	ENSG00000134058	ENSG00000262841	ENSG00000134058
pqn-85	Y43H11AL.3	ENSG00000164190	ENSG00000164190	-	ENSG00000164190
R01B10.4	R01B10.4	ENSG00000161395	ENSG00000161395	-	ENSG00000161395
dnpp-1	F01F1.9	ENSG00000123992	ENSG00000123992	-	ENSG00000123992
cyn-15	Y87G2A.6	-	ENSG00000113593	ENSG00000113593	ENSG00000113593
T23H2.3	T23H2.3	ENSG00000116830	ENSG00000116830	-	ENSG00000116830,ENSG00000071794
T12E12.1	T12E12.1	ENSG00000177479	ENSG00000177479	ENSG00000177479	ENSG00000177479
atg-4.2	ZK792.8	ENSG00000125703,ENSG00000130734	ENSG00000130734,ENSG00000125703	ENSG00000130734	ENSG00000168397,ENSG00000125703,ENSG00000101844,ENSG00000130734
R05D3.12	R05D3.12	-	-	-	ENSG00000077097, ENSG00000131747
his-51	F07B7.10	ENSG00000184825,ENSG00000184348,ENSG00000182611,ENSG00000196787,ENSG00000196747,ENSG00000198374,ENSG00000233224,ENSG00000164508	-	ENSG00000263965	ENSG00000184270,ENSG00000180573,ENSG00000188486,ENSG00000164508,ENSG00000182611,ENSG00000184348,ENSG00000198374,ENSG00000196747,ENSG00000196787,ENSG00000233224,ENSG00000184825,ENSG00000184260,ENSG00000137259,ENSG00000168274,ENSG00000203812,ENSG00000183558,ENSG00000196866,ENSG00000181218
cks-1	C09G4.3	ENSG00000173207,ENSG00000233281,ENSG00000178556,ENSG00000123975	ENSG00000173207,ENSG00000178556	ENSG00000268942	ENSG00000173207,ENSG00000123975,ENSG00000178556
atg-18	F41E6.13	ENSG00000070540,ENSG00000157954	ENSG00000157954,ENSG00000070540	ENSG00000157954	ENSG00000157954,ENSG00000070540
arl-8	Y57G11C.13	ENSG00000143862,ENSG00000134108	ENSG00000134108,ENSG00000143862	ENSG00000143862	ENSG00000134108,ENSG00000143862
cdc-25.3	ZK637.11	ENSG00000164045,ENSG00000158402,ENSG00000101224	ENSG00000101224	-	ENSG00000101224,ENSG00000164045,ENSG00000158402
gld-1	T23G11.3	ENSG00000112531	-	ENSG00000112531	-
pmp-4	T02D1.5	ENSG00000101986,ENSG00000226760,ENSG00000173208	ENSG00000173208,ENSG00000101986	ENSG00000173208	ENSG00000117528,ENSG00000101986,ENSG00000173208,ENSG00000119688
ife-2	R04A9.4	ENSG00000151247,ENSG00000175766	-	-	-
fkb-6	F31D4.3	ENSG00000004478,ENSG00000096060,ENSG00000077800	ENSG00000004478,ENSG00000096060	ENSG00000004478	ENSG00000088832,ENSG00000096060,ENSG00000004478,ENSG00000119782
tmbi-4	B0563.4	ENSG00000155957	ENSG00000155957	ENSG00000155957	ENSG00000178719,ENSG00000155957,ENSG00000135926
vps-32.1	C56C10.3	ENSG00000100931,ENSG00000101421,ENSG00000164695	ENSG00000101421,ENSG00000164695,ENSG00000254505	ENSG00000101421	ENSG00000101421,ENSG00000254505,ENSG00000164695
vps-60	F41E6.9	ENSG00000086065	ENSG00000086065	ENSG00000086065	ENSG00000086065
rcq-5	E03A3.2	ENSG00000108469	ENSG00000108469	ENSG00000108469	ENSG00000108469
mig-23	R07E4.4	ENSG00000198018,ENSG00000197217,ENSG00000138185,ENSG00000168032,ENSG00000188833,ENSG00000054179	ENSG00000197217,ENSG00000198018	ENSG00000197217	ENSG00000197217,ENSG00000198018,ENSG00000138185,ENSG00000168032
W01D2.1	W01D2.1	ENSG00000145592	ENSG00000145592	ENSG00000145592	ENSG00000145592
arl-5	ZK632.8	ENSG00000141748,ENSG00000165997,ENSG00000162980	ENSG00000165997,ENSG00000162980,ENSG00000141748	ENSG00000162980	ENSG00000165997,ENSG00000162980
spas-1	C24B5.2	ENSG00000021574	ENSG00000021574	ENSG00000021574	ENSG00000021574,ENSG00000132436
Y54G11A.11	Y54G11A.11	ENSG00000130165	ENSG00000130165	ENSG00000130165	ENSG00000130165
dna-2	F43G6.1	ENSG00000138346	ENSG00000138346	ENSG00000138346	ENSG00000138346
ptr-17	Y18D10A.7	ENSG00000182077,ENSG00000165186,ENSG00000178729,ENSG00000244694	-	-	-
zyg-9	F22B5.7	ENSG00000175216	ENSG00000175216	ENSG00000175216	ENSG00000175216
ZK1058.5	ZK1058.5	ENSG00000206562	ENSG00000206562	ENSG00000206562	ENSG00000165055,ENSG00000087995,ENSG00000206562,ENSG00000123600
kin-20	F46F2.2	ENSG00000213923,ENSG00000141551	ENSG00000141551,ENSG00000213923	ENSG00000213923	ENSG00000113712,ENSG00000141551,ENSG00000213923
his-49	F07B7.5	ENSG00000203818	ENSG00000203813,ENSG00000182572,ENSG00000178458,ENSG00000112727,ENSG00000124693,ENSG00000196532,ENSG00000197153,ENSG00000196966,ENSG00000203852,ENSG00000203811,ENSG00000198366,ENSG00000183598,ENSG00000168148	ENSG00000203811	ENSG00000183598,ENSG00000203811,ENSG00000203852,ENSG00000132475,ENSG00000163041,ENSG00000112727,ENSG00000124693,ENSG00000178458,ENSG00000182572,ENSG00000198366,ENSG00000197153,ENSG00000196966,ENSG00000196532,ENSG00000203813,ENSG00000197409,ENSG00000203818
rpl-41	C09H10.2	ENSG00000231409,ENSG00000241343,ENSG00000165502,ENSG00000214759	ENSG00000165502	ENSG00000165502	ENSG00000165502,ENSG00000241343
his-43	F08G2.2	ENSG00000184825,ENSG00000184348,ENSG00000182611,ENSG00000196787,ENSG00000196747,ENSG00000198374,ENSG00000233224,ENSG00000164508	-	ENSG00000263965	ENSG00000184270,ENSG00000180573,ENSG00000188486,ENSG00000164508,ENSG00000182611,ENSG00000184348,ENSG00000198374,ENSG00000196747,ENSG00000196787,ENSG00000233224,ENSG00000184825,ENSG00000184260,ENSG00000137259,ENSG00000168274,ENSG00000203812,ENSG00000183558,ENSG00000196866,ENSG00000181218
ama-1	F36A4.7	ENSG00000181222	ENSG00000181222	ENSG00000181222	ENSG00000148606,ENSG00000181222
cash-1	K07C5.8	ENSG00000090372,ENSG00000115808,ENSG00000196792,ENSG00000226400	ENSG00000196792,ENSG00000115808,ENSG00000090372	-	ENSG00000115808,ENSG00000196792,ENSG00000090372
Y54E2A.4	Y54E2A.4	ENSG00000112249	ENSG00000112249	-	ENSG00000144028,ENSG00000112249
klp-16	C41G7.2	ENSG00000237649,ENSG00000167702	ENSG00000140859	-	-
ptr-21	Y65B4BR.3	ENSG00000182077,ENSG00000165186,ENSG00000178729,ENSG00000244694	-	-	-
tbp-1	T20B12.2	ENSG00000112592,ENSG00000182521	ENSG00000112592,ENSG00000182521	ENSG00000112592	ENSG00000112592,ENSG00000182521
acs-4	F37C12.7	ENSG00000068366,ENSG00000123983	ENSG00000068366,ENSG00000123983	-	ENSG00000151726,ENSG00000197142,ENSG00000164398,ENSG00000123983,ENSG00000068366
W02B12.10	W02B12.10	ENSG00000037897	ENSG00000037897	ENSG00000037897	ENSG00000037897
cyk-3	ZK328.1	ENSG00000170832,ENSG00000238209,ENSG00000129204	ENSG00000129204	ENSG00000170832	ENSG00000170832,ENSG00000238209,ENSG00000129204,ENSG00000234972,ENSG00000185128,ENSG00000161583,ENSG00000197681,ENSG00000224226,ENSG00000242384
K08F9.1	K08F9.1	ENSG00000136856,ENSG00000160326	-	-	-
oxy-4	Y54H5A.4	ENSG00000103245,ENSG00000141562	ENSG00000103245,ENSG00000141562	-	ENSG00000103245
hum-1	F29D10.4	ENSG00000142347,ENSG00000157483	ENSG00000157483,ENSG00000142347	ENSG00000157483	ENSG00000136286,ENSG00000157483,ENSG00000166866,ENSG00000176658,ENSG00000197879,ENSG00000128641,ENSG00000142347
jhdm-1	T26A5.5	ENSG00000089094,ENSG00000173120,ENSG00000099364	ENSG00000089094,ENSG00000173120,ENSG00000099364	-	ENSG00000089094,ENSG00000173120
suca-1	F47B10.1	ENSG00000136143	ENSG00000136143	-	ENSG00000172340,ENSG00000136143
K12H4.4	K12H4.4	ENSG00000129128	ENSG00000129128	ENSG00000129128	ENSG00000129128
athp-2	H20J04.2	ENSG00000198604	ENSG00000198604	-	ENSG00000198604
gpi-1	Y87G2A.8	ENSG00000105220	ENSG00000105220	ENSG00000105220	ENSG00000105220
C45G3.3	C45G3.3	ENSG00000144182	ENSG00000144182	-	ENSG00000144182
his-57	F54E12.5	ENSG00000184825,ENSG00000184348,ENSG00000182611,ENSG00000196787,ENSG00000196747,ENSG00000198374,ENSG00000233224,ENSG00000164508	-	ENSG00000263965	ENSG00000184270,ENSG00000180573,ENSG00000188486,ENSG00000164508,ENSG00000182611,ENSG00000184348,ENSG00000198374,ENSG00000196747,ENSG00000196787,ENSG00000233224,ENSG00000184825,ENSG00000184260,ENSG00000137259,ENSG00000168274,ENSG00000203812,ENSG00000183558,ENSG00000196866,ENSG00000181218
R09B3.2	R09B3.2	ENSG00000101811,ENSG00000177613	ENSG00000197038,ENSG00000131003,ENSG00000102317	-	ENSG00000102317,ENSG00000099622
mpk-1	F43C1.2	ENSG00000102882,ENSG00000100030	ENSG00000100030,ENSG00000102882	ENSG00000100030	ENSG00000100030,ENSG00000102882,ENSG00000166484
unc-85	F10G7.3	ENSG00000105011,ENSG00000111875	ENSG00000105011,ENSG00000111875	ENSG00000111875	ENSG00000111875,ENSG00000105011
cdc-25.4	R05H5.2	ENSG00000164045,ENSG00000158402,ENSG00000101224	-	-	-
lig-1	C29A12.3	ENSG00000105486	ENSG00000105486	ENSG00000105486	ENSG00000105486
emb-27	F10B5.6	ENSG00000130177	ENSG00000130177	-	ENSG00000130177
hmg-1.1	Y48B6A.14	ENSG00000103460,ENSG00000198846,ENSG00000092203,ENSG00000124191	-	-	-
cyn-9	T27D1.1	ENSG00000138398,ENSG00000114857	-	-	ENSG00000138398,ENSG00000114857
tbc-6	C04A2.1	ENSG00000139835	ENSG00000139835	ENSG00000087495	ENSG00000139835,ENSG00000167202,ENSG00000095383
his-63	F22B3.2	ENSG00000203818	-	ENSG00000203811	ENSG00000183598,ENSG00000203811,ENSG00000203852,ENSG00000132475,ENSG00000163041,ENSG00000112727,ENSG00000124693,ENSG00000178458,ENSG00000182572,ENSG00000198366,ENSG00000197153,ENSG00000196966,ENSG00000196532,ENSG00000203813,ENSG00000197409,ENSG00000203818
C23H4.6	C23H4.6	ENSG00000163029	ENSG00000163029	ENSG00000163029	ENSG00000163029
tag-123	F08F1.7	ENSG00000125304	ENSG00000125304	ENSG00000125304	ENSG00000101337,ENSG00000125304
mrp-3	E03G2.2	ENSG00000103222,ENSG00000108846,ENSG00000023839,ENSG00000215557,ENSG00000091262	-	ENSG00000108846	ENSG00000091262,ENSG00000069431,ENSG00000108846,ENSG00000006071,ENSG00000140798,ENSG00000114770,ENSG00000121270,ENSG00000023839,ENSG00000124574,ENSG00000125257,ENSG00000103222,ENSG00000233112
kin-34	R02C2.2	ENSG00000149554	-	-	-
pes-9	R11H6.1	ENSG00000133313,ENSG00000150656	-	-	ENSG00000133313,ENSG00000150656
ptr-14	R09H10.4	ENSG00000182077,ENSG00000165186,ENSG00000178729,ENSG00000244694	-	-	-
puf-6	F18A11.1	ENSG00000134644,ENSG00000055917	-	-	-
nfya-1	T08D10.1	ENSG00000001167	ENSG00000001167	-	ENSG00000001167
psf-1	R53.6	ENSG00000101003	ENSG00000101003	ENSG00000101003	ENSG00000101003
wrn-1	F18C5.2	ENSG00000165392	ENSG00000165392	ENSG00000165392	ENSG00000165392,ENSG00000197299,ENSG00000004700
mrp-8	Y75B8A.26	ENSG00000103222,ENSG00000108846,ENSG00000023839,ENSG00000215557,ENSG00000091262	-	-	ENSG00000091262,ENSG00000069431,ENSG00000108846,ENSG00000006071,ENSG00000140798,ENSG00000114770,ENSG00000121270,ENSG00000023839,ENSG00000124574,ENSG00000125257,ENSG00000103222,ENSG00000233112
sec-24.1	F12F6.6	ENSG00000176986,ENSG00000150961	ENSG00000176986,ENSG00000150961	ENSG00000176986	ENSG00000176986,ENSG00000150961
catp-6	W08D2.5	ENSG00000133657,ENSG00000127249,ENSG00000187527,ENSG00000159363	ENSG00000133657,ENSG00000127249,ENSG00000187527	-	ENSG00000159363,ENSG00000127249,ENSG00000187527,ENSG00000133657
R166.3	R166.3	ENSG00000101935,ENSG00000144233	ENSG00000101935,ENSG00000144233	ENSG00000101935	ENSG00000101935,ENSG00000144233
C25H3.8	C25H3.8	ENSG00000048707	ENSG00000048707	ENSG00000048707	ENSG00000048707
marc-3	C17E4.3	ENSG00000099785,ENSG00000173926	-	-	ENSG00000099785
apc-2	K06H7.6	ENSG00000176248	ENSG00000176248	-	ENSG00000176248
C36A4.4	C36A4.4	ENSG00000117143,ENSG00000197355	ENSG00000117143,ENSG00000197355	-	ENSG00000117143,ENSG00000197355
ocrl-1	C16C2.3	ENSG00000122126,ENSG00000204084	ENSG00000204084,ENSG00000122126	ENSG00000204084	ENSG00000122126,ENSG00000204084
C16A3.1	C16A3.1	ENSG00000138375	ENSG00000138375	-	ENSG00000138375,ENSG00000121988
dox-1	Y52B11A.9	ENSG00000151657	ENSG00000151657	ENSG00000151657	ENSG00000151657
F52A8.5	F52A8.5	ENSG00000140905	ENSG00000140905	ENSG00000140905	ENSG00000140905
cdc-73	F35F11.1	ENSG00000134371	ENSG00000134371	ENSG00000134371	ENSG00000134371
pcf-11	R144.2	ENSG00000165494	ENSG00000165494	-	ENSG00000165494
acl-11	F28B3.9	ENSG00000155189	ENSG00000155189	ENSG00000155189	ENSG00000155189
unc-32	ZK637.8	ENSG00000033627,ENSG00000105929,ENSG00000110719,ENSG00000185344	ENSG00000033627,ENSG00000105929	ENSG00000033627	ENSG00000033627,ENSG00000110719,ENSG00000105929,ENSG00000185344
xbx-6	F40F9.1	ENSG00000178719,ENSG00000135472,ENSG00000135926	ENSG00000135472,ENSG00000135926,ENSG00000178719	ENSG00000135472	ENSG00000178719,ENSG00000155957,ENSG00000135926
oma-1	C09G9.6	-	ENSG00000152518,ENSG00000185650	-	-
klp-19	Y43F4B.6	ENSG00000090889,ENSG00000226650	ENSG00000090889	ENSG00000090889	ENSG00000090889,ENSG00000226650
cnx-1	ZK632.6	ENSG00000127022,ENSG00000153132	ENSG00000127022,ENSG00000153132	ENSG00000127022	ENSG00000153132,ENSG00000127022
Y37A1A.3	Y37A1A.3	ENSG00000136856,ENSG00000160326	-	-	-
pmp-3	C54G10.3	ENSG00000119688	ENSG00000119688	ENSG00000119688	ENSG00000117528,ENSG00000101986,ENSG00000173208,ENSG00000119688
puf-7	B0273.2	ENSG00000134644,ENSG00000055917	-	-	-
msh-6	Y47G6A.11	ENSG00000116062	ENSG00000116062	ENSG00000116062	ENSG00000116062,ENSG00000113318
xnp-1	B0041.7	ENSG00000085224	-	ENSG00000268946	ENSG00000085224
snb-1	T10H9.4	ENSG00000220205,ENSG00000139190,ENSG00000049245	ENSG00000139190,ENSG00000179036	ENSG00000049245	ENSG00000220205,ENSG00000117533,ENSG00000118640,ENSG00000049245,ENSG00000139190
cyb-3	T06E6.2	ENSG00000147082	-	-	ENSG00000145386,ENSG00000147082,ENSG00000134057,ENSG00000157456,ENSG00000133101
cyb-1	ZC168.4	ENSG00000157456,ENSG00000134057	ENSG00000134057,ENSG00000157456	-	ENSG00000145386,ENSG00000147082,ENSG00000134057,ENSG00000157456,ENSG00000133101
hda-3	R06C1.1	ENSG00000116478,ENSG00000196591	-	ENSG00000196591	ENSG00000116478,ENSG00000196591,ENSG00000171720
ptr-6	C54A12.1	ENSG00000182077,ENSG00000165186,ENSG00000178729,ENSG00000244694	-	-	-
rpn-6.2	F59B2.5	ENSG00000108671	-	-	-
snpc-4	F32H2.1	ENSG00000185697,ENSG00000118513,ENSG00000101057,ENSG00000165684	-	-	ENSG00000165684
lin-59	T12F5.4	ENSG00000152217	-	-	ENSG00000116539
Y54E10A.6	Y54E10A.6	ENSG00000130764	ENSG00000130764	ENSG00000130764	ENSG00000130764
atm-1	Y48G1BL.2	ENSG00000149311	-	ENSG00000149311	ENSG00000149311
ZK643.2	ZK643.2	ENSG00000129187	ENSG00000129187	-	ENSG00000129187
T27F7.4	T27F7.4	ENSG00000069943	ENSG00000069943	-	-
aho-3	K04G2.2	ENSG00000136379,ENSG00000129968,ENSG00000203835,ENSG00000107362	ENSG00000107362,ENSG00000136379,ENSG00000203835,ENSG00000198658,ENSG00000129968,ENSG00000182502	ENSG00000136379	ENSG00000107362,ENSG00000136379,ENSG00000203835,ENSG00000129968
dnc-1	ZK593.5	ENSG00000204843	ENSG00000204843	ENSG00000204843	ENSG00000204843
rab-5	F26H9.6	ENSG00000111540,ENSG00000108774,ENSG00000144566	ENSG00000144566,ENSG00000111540,ENSG00000108774	ENSG00000144566	ENSG00000111540,ENSG00000108774,ENSG00000144566,ENSG00000124209
rad-51	Y43C5A.6	ENSG00000108384,ENSG00000182185,ENSG00000185379	ENSG00000051180	ENSG00000051180	ENSG00000051180,ENSG00000100206
catp-8	C10C6.6	ENSG00000105726	ENSG00000105726	ENSG00000105726	ENSG00000105726
abtm-1	Y74C10AR.3	ENSG00000131269	ENSG00000131269	ENSG00000131269	ENSG00000131269,ENSG00000115657
cdk-5	T27E9.3	ENSG00000164885	ENSG00000164885	ENSG00000164885	ENSG00000170312,ENSG00000164885,ENSG00000123374,ENSG00000108504
npp-10	ZK328.5	ENSG00000110713	ENSG00000110713	-	ENSG00000110713
pde-2	R08D7.6	ENSG00000186642	ENSG00000186642	-	ENSG00000186642
K07B1.4	K07B1.4	ENSG00000062282,ENSG00000166391,ENSG00000204195,ENSG00000205267,ENSG00000106384,ENSG00000184210,ENSG00000124003	ENSG00000124003,ENSG00000062282	ENSG00000124003	ENSG00000166391,ENSG00000124003,ENSG00000062282,ENSG00000184210
hum-5	T02C12.1	ENSG00000176658,ENSG00000136286,ENSG00000128641,ENSG00000166866	ENSG00000176658,ENSG00000136286	ENSG00000176658	ENSG00000136286,ENSG00000157483,ENSG00000166866,ENSG00000176658,ENSG00000197879,ENSG00000128641,ENSG00000142347
grp-1	K06H7.4	ENSG00000008256,ENSG00000108669,ENSG00000105443,ENSG00000100055	ENSG00000008256,ENSG00000108669,ENSG00000105443,ENSG00000100055	-	ENSG00000008256,ENSG00000108669,ENSG00000105443
asfl-1	C03D6.5	ENSG00000105011,ENSG00000111875	ENSG00000105011,ENSG00000111875	ENSG00000111875	ENSG00000111875,ENSG00000105011
xpg-1	F57B10.6	ENSG00000134899	ENSG00000134899	-	ENSG00000134899
mrp-6	F20B6.3	ENSG00000125257,ENSG00000001626	-	ENSG00000125257	ENSG00000091262,ENSG00000069431,ENSG00000108846,ENSG00000006071,ENSG00000140798,ENSG00000114770,ENSG00000121270,ENSG00000023839,ENSG00000124574,ENSG00000125257,ENSG00000103222,ENSG00000233112
vha-7	C26H9A.1	ENSG00000033627,ENSG00000105929,ENSG00000110719,ENSG00000185344	-	-	ENSG00000033627,ENSG00000110719,ENSG00000105929,ENSG00000185344
gpx-1	F26E4.12	ENSG00000167468	-	ENSG00000167468	ENSG00000167468,ENSG00000116157,ENSG00000164294
ntl-9	C26E6.3	ENSG00000144580	ENSG00000144580	-	ENSG00000144580
his-70	E03A3.4	ENSG00000163041,ENSG00000188375,ENSG00000224213,ENSG00000231687	-	-	-
gck-1	T19A5.2	ENSG00000115694,ENSG00000102572,ENSG00000134602	ENSG00000115694,ENSG00000102572	ENSG00000115694	ENSG00000115694,ENSG00000102572,ENSG00000134602
tag-153	F44A2.1	ENSG00000111596	-	-	-
tre-2	T05A12.2	ENSG00000118094	-	-	ENSG00000118094
panl-2	F31E3.4	ENSG00000135473	ENSG00000135473	-	ENSG00000135473
T20F7.3	T20F7.3	ENSG00000176095,ENSG00000068745,ENSG00000161896	-	-	-
wdr-5.1	C14B1.4	ENSG00000196363,ENSG00000196981	ENSG00000196363,ENSG00000196981	-	ENSG00000196363,ENSG00000196981
R119.2	R119.2	ENSG00000196236	ENSG00000196236	-	ENSG00000196236,ENSG00000124299
F33H2.5	F33H2.5	ENSG00000177084	ENSG00000177084	ENSG00000177084	ENSG00000177084
mys-4	C34B7.4	ENSG00000083168,ENSG00000136504,ENSG00000156650	ENSG00000136504	-	-
klp-3	T09A5.2	ENSG00000140859	ENSG00000204197	-	ENSG00000204197,ENSG00000237649,ENSG00000233450,ENSG00000140859
unc-59	W09C5.2	ENSG00000122545,ENSG00000184702,ENSG00000214765,ENSG00000108387,ENSG00000120555,ENSG00000168385,ENSG00000180096	ENSG00000122545,ENSG00000214765	ENSG00000122545	ENSG00000122545
Y71H2AM.11	Y71H2AM.11	ENSG00000133313,ENSG00000150656	ENSG00000133313	ENSG00000133313	ENSG00000133313,ENSG00000150656
ari-1	C27A12.8	ENSG00000166233	ENSG00000166233	ENSG00000166233	ENSG00000166233
air-2	B0207.4	ENSG00000178999,ENSG00000105146,ENSG00000087586	ENSG00000087586,ENSG00000178999,ENSG00000105146	ENSG00000087586	ENSG00000087586,ENSG00000178999,ENSG00000105146
Y32H12A.7	Y32H12A.7	ENSG00000133597	ENSG00000133597	ENSG00000133597	ENSG00000133597
exo-3	R09B3.1	ENSG00000100823	ENSG00000100823	ENSG00000100823	ENSG00000100823,ENSG00000169188
T22F3.3	T22F3.3	ENSG00000068976,ENSG00000100994,ENSG00000100504	ENSG00000068976,ENSG00000100994,ENSG00000100504	ENSG00000068976	ENSG00000068976,ENSG00000100504,ENSG00000100994
tct-1	F25H2.11	ENSG00000133112,ENSG00000219491	ENSG00000133112	ENSG00000087495	ENSG00000133112
his-53	F07B7.3	ENSG00000184825,ENSG00000184348,ENSG00000182611,ENSG00000196787,ENSG00000196747,ENSG00000198374,ENSG00000233224,ENSG00000164508	-	ENSG00000263965	ENSG00000184270,ENSG00000180573,ENSG00000188486,ENSG00000164508,ENSG00000182611,ENSG00000184348,ENSG00000198374,ENSG00000196747,ENSG00000196787,ENSG00000233224,ENSG00000184825,ENSG00000184260,ENSG00000137259,ENSG00000168274,ENSG00000203812,ENSG00000183558,ENSG00000196866,ENSG00000181218
rap-2	C25D7.7	ENSG00000125249,ENSG00000181467,ENSG00000123728	ENSG00000123728,ENSG00000125249,ENSG00000181467	ENSG00000125249	ENSG00000125249,ENSG00000123728,ENSG00000181467
rbpl-1	F36F2.3	ENSG00000122257	ENSG00000122257	-	ENSG00000122257
pms-2	H12C20.2	ENSG00000122512,ENSG00000078319,ENSG00000198632,ENSG00000188073,ENSG00000127957,ENSG00000174368,ENSG00000186704,ENSG00000123965,ENSG00000064933	ENSG00000122512	ENSG00000122512	ENSG00000122512
wht-4	F02E11.1	-	ENSG00000160179,ENSG00000172350	ENSG00000172350	-
obr-4	C32F10.1	ENSG00000117859	ENSG00000117859	ENSG00000117859	ENSG00000117859
mei-1	T01G9.5	ENSG00000102781,ENSG00000186625	ENSG00000102781,ENSG00000186625	-	ENSG00000186625,ENSG00000102781
acs-5	Y76A2B.3	ENSG00000164398,ENSG00000151726,ENSG00000197142	-	-	ENSG00000151726,ENSG00000197142,ENSG00000164398,ENSG00000123983,ENSG00000068366
che-3	F18C12.1	ENSG00000187240	-	ENSG00000187240	ENSG00000158486,ENSG00000007174,ENSG00000039139,ENSG00000114841,ENSG00000174844,ENSG00000118997,ENSG00000124721,ENSG00000197102,ENSG00000183914,ENSG00000115423,ENSG00000187775,ENSG00000187240,ENSG00000197653,ENSG00000105877,ENSG00000185842
xpo-2	Y48G1A.5	ENSG00000124207	ENSG00000124207	-	ENSG00000124207
ife-3	B0348.6	ENSG00000151247,ENSG00000175766	ENSG00000151247,ENSG00000175766	ENSG00000151247	ENSG00000151247,ENSG00000175766
vps-53	T05G5.8	ENSG00000141252	ENSG00000141252	-	ENSG00000141252
mppb-1	ZC410.2	ENSG00000105819,ENSG00000010256	ENSG00000105819,ENSG00000010256	ENSG00000105819	ENSG00000105819,ENSG00000010256
Y57G11C.36	Y57G11C.36	ENSG00000112232,ENSG00000131773,ENSG00000121774	-	-	-
wdr-48	F35G12.4	ENSG00000114742	ENSG00000114742	-	ENSG00000114742
ptr-16	T21H3.2	ENSG00000182077,ENSG00000165186,ENSG00000178729,ENSG00000244694	-	-	-
asd-2	T21G5.5	ENSG00000112531	ENSG00000112531	-	ENSG00000112531
rpac-19	F58A4.9	ENSG00000186184	-	-	ENSG00000186184
rbx-2	R10A10.2	ENSG00000114125	ENSG00000114125	ENSG00000114125	ENSG00000114125
catp-7	Y59H11AR.2	ENSG00000133657,ENSG00000127249,ENSG00000187527,ENSG00000159363	ENSG00000133657,ENSG00000127249,ENSG00000187527	-	ENSG00000159363,ENSG00000127249,ENSG00000187527,ENSG00000133657
helq-1	Y55B1AL.3	ENSG00000163312	ENSG00000163312	ENSG00000163312	ENSG00000051341,ENSG00000163312
smc-3	Y47D3A.26	ENSG00000108055	ENSG00000108055	ENSG00000108055	ENSG00000108055
apc-10	F15H10.3	ENSG00000164162	-	-	-
ikke-1	R107.4	ENSG00000104365,ENSG00000213341,ENSG00000183735,ENSG00000143466	-	-	-
F32B6.3	F32B6.3	ENSG00000165630	ENSG00000165630	ENSG00000165630	ENSG00000165630
rnf-113	K01G5.1	ENSG00000125352,ENSG00000139797	ENSG00000125352,ENSG00000139797	-	ENSG00000125352,ENSG00000139797
mpk-2	C04G6.1	ENSG00000166484	-	-	-
ntp-1	C33H5.14	ENSG00000198018,ENSG00000197217,ENSG00000138185,ENSG00000168032,ENSG00000188833,ENSG00000054179	ENSG00000197217,ENSG00000198018	ENSG00000197217	ENSG00000197217,ENSG00000198018,ENSG00000138185,ENSG00000168032
tag-72	C25A1.3	ENSG00000101654	ENSG00000101654	ENSG00000101654	ENSG00000101654
ben-1	C54C6.2	ENSG00000173876,ENSG00000173213,ENSG00000159247,ENSG00000127589,ENSG00000101162	-	ENSG00000235067	ENSG00000101162,ENSG00000127589,ENSG00000137285,ENSG00000104833,ENSG00000258947,ENSG00000173213,ENSG00000176014,ENSG00000173876,ENSG00000196230,ENSG00000188229,ENSG00000137267,ENSG00000183311,ENSG00000224156,ENSG00000229684,ENSG00000235067,ENSG00000227739,ENSG00000232575,ENSG00000232421
rae-1	F10G8.3	ENSG00000101146	ENSG00000101146	-	ENSG00000101146
polq-1	W03A3.2	ENSG00000051341	ENSG00000051341	-	ENSG00000051341,ENSG00000163312
F21D5.5	F21D5.5	ENSG00000039650	ENSG00000039650	ENSG00000039650	ENSG00000039650
aak-1	PAR2.3	ENSG00000132356,ENSG00000162409	-	-	-
tbb-4	B0272.1	ENSG00000137285,ENSG00000137267,ENSG00000104833,ENSG00000188229,ENSG00000196230,ENSG00000074935	ENSG00000188229,ENSG00000104833,ENSG00000183311,ENSG00000137379,ENSG00000196230,ENSG00000137285,ENSG00000137267	ENSG00000188229	ENSG00000101162,ENSG00000127589,ENSG00000137285,ENSG00000104833,ENSG00000258947,ENSG00000173213,ENSG00000176014,ENSG00000173876,ENSG00000196230,ENSG00000188229,ENSG00000137267,ENSG00000183311,ENSG00000224156,ENSG00000229684,ENSG00000235067,ENSG00000227739,ENSG00000232575,ENSG00000232421
rad-54	W06D4.6	ENSG00000085999	ENSG00000085999	ENSG00000085999	ENSG00000197275,ENSG00000085999
C24F3.2	C24F3.2	-	ENSG00000081721	-	ENSG00000081721
ced-5	C02F4.1	ENSG00000088538,ENSG00000128512	ENSG00000150760,ENSG00000147459,ENSG00000134516,ENSG00000088538,ENSG00000128512	ENSG00000150760	ENSG00000134516,ENSG00000088538,ENSG00000147459,ENSG00000128512,ENSG00000150760
gen-1	T12A2.8	ENSG00000134899	-	-	-
nars-1	F22D6.3	ENSG00000134440	ENSG00000134440	-	ENSG00000134440,ENSG00000137513
smo-1	K12C11.2	ENSG00000116030	ENSG00000116030	ENSG00000087495	ENSG00000188612,ENSG00000228532,ENSG00000116030,ENSG00000184900
mau-8	Y62E10A.8	-	ENSG00000136940,ENSG00000116703	ENSG00000136940	ENSG00000136940
hmt-1	W09D6.6	ENSG00000115657	ENSG00000115657	ENSG00000115657	ENSG00000131269,ENSG00000115657
pus-1	W06H3.2	ENSG00000177192	ENSG00000177192	ENSG00000177192	ENSG00000177192
vps-11	R06F6.2	ENSG00000160695	ENSG00000160695	-	ENSG00000160695
smc-4	F35G12.8	ENSG00000113810	ENSG00000113810	-	ENSG00000113810
dpy-27	R13G10.1	ENSG00000113810	-	-	ENSG00000113810
Y55F3AR.2	Y55F3AR.2	ENSG00000091164	-	-	ENSG00000100348,ENSG00000136810
xrn-2	Y48B6A.3	ENSG00000088930	ENSG00000088930	ENSG00000088930	ENSG00000088930,ENSG00000114127
hda-6	F41H10.6	-	ENSG00000094631	-	ENSG00000094631,ENSG00000100429
daf-6	F31F6.5	ENSG00000182077,ENSG00000165186,ENSG00000178729,ENSG00000244694	-	-	-
cft-1	C18C4.2	ENSG00000233112	-	-	-
bub-1	R06C7.8	ENSG00000169679	-	-	-
vps-39	T08G5.5	ENSG00000166887	ENSG00000166887	ENSG00000166887	ENSG00000166887
elc-1	Y82E9BR.15	ENSG00000154582,ENSG00000105694	ENSG00000154582	ENSG00000087495	ENSG00000154582
swsn-1	Y113G7B.23	ENSG00000139613,ENSG00000173473	ENSG00000173473,ENSG00000139613	-	ENSG00000173473,ENSG00000139613
reps-1	Y39B6A.38	ENSG00000169891,ENSG00000135597	ENSG00000169891,ENSG00000135597	-	ENSG00000169891
mtm-1	Y110A7A.5	ENSG00000087053,ENSG00000063601,ENSG00000171100	ENSG00000171100,ENSG00000087053,ENSG00000063601	ENSG00000269031	ENSG00000087053,ENSG00000063601,ENSG00000171100
cyb-2.1	Y43E12A.1	ENSG00000157456,ENSG00000134057	ENSG00000134057,ENSG00000157456	-	ENSG00000145386,ENSG00000147082,ENSG00000134057,ENSG00000157456,ENSG00000133101
K02F3.2	K02F3.2	ENSG00000004864,ENSG00000115840	ENSG00000115840,ENSG00000004864	ENSG00000115840	ENSG00000115840,ENSG00000004864
rpb-2	C26E6.4	ENSG00000047315	ENSG00000047315	ENSG00000047315	ENSG00000013503,ENSG00000047315
ulp-4	C41C4.6	ENSG00000112701,ENSG00000138468	-	-	-
cdc-6	C43E11.10	-	ENSG00000094804	ENSG00000094804	ENSG00000085840,ENSG00000094804
npp-9	F59A2.1	-	-	-	ENSG00000153201,ENSG00000015568,ENSG00000153165,ENSG00000169629,ENSG00000183054,ENSG00000196862,ENSG00000185304,ENSG00000187627,ENSG00000099901
lpd-8	R10H10.1	ENSG00000169599	ENSG00000169599	ENSG00000169599	ENSG00000169599
let-711	F57B9.2	ENSG00000125107	ENSG00000125107	ENSG00000125107	ENSG00000125107
cept-2	Y49A3A.1	ENSG00000134255,ENSG00000111666	ENSG00000134255,ENSG00000111666	ENSG00000075239	ENSG00000138018,ENSG00000134255
trx-4	Y44E3A.3	ENSG00000136810,ENSG00000204193,ENSG00000168454	-	-	-
atg-7	M7.5	ENSG00000197548	ENSG00000197548	ENSG00000197548	ENSG00000197548
cdf-1	C15B12.7	ENSG00000196660	ENSG00000170385,ENSG00000196660	ENSG00000170385	ENSG00000162695,ENSG00000158014,ENSG00000170385,ENSG00000104154,ENSG00000164756,ENSG00000196660,ENSG00000145740
W09D10.1	W09D10.1	ENSG00000084070,ENSG00000112305,ENSG00000184060,ENSG00000105963	ENSG00000112305,ENSG00000084070	ENSG00000112305	ENSG00000112305,ENSG00000084070
Y64H9A.1	Y64H9A.1	ENSG00000100528,ENSG00000143786,ENSG00000174871	-	-	-
rpn-6.1	F57B9.10	ENSG00000108671	ENSG00000108671	-	ENSG00000108671
ife-4	C05D9.5	ENSG00000135930	ENSG00000135930	ENSG00000087495	ENSG00000135930
ubh-1	F46E10.8	ENSG00000118939,ENSG00000154277	ENSG00000154277,ENSG00000118939	-	ENSG00000154277
rnp-3	K08D10.3	ENSG00000077312,ENSG00000125870	ENSG00000125870	ENSG00000125870	ENSG00000125870,ENSG00000077312
pct-1	C07G1.3	ENSG00000102225,ENSG00000117266,ENSG00000059758	ENSG00000059758,ENSG00000102225,ENSG00000117266	ENSG00000059758	ENSG00000059758,ENSG00000102225,ENSG00000117266
ptp-2	F59G1.5	ENSG00000179295,ENSG00000111679	ENSG00000179295,ENSG00000111679,ENSG00000217801	ENSG00000179295	ENSG00000179295,ENSG00000111679
puf-11	Y73B6BL.38	ENSG00000134644,ENSG00000055917	-	-	-
gale-1	C47B2.6	ENSG00000117308		ENSG00000117308	ENSG00000117308
phb-2	T24H7.1	ENSG00000215021	ENSG00000215021	ENSG00000269079	ENSG00000215021
cdf-2	T18D3.3	ENSG00000158014,ENSG00000164756,ENSG00000115194	ENSG00000158014,ENSG00000115194,ENSG00000164756	-	ENSG00000162695,ENSG00000158014,ENSG00000170385,ENSG00000104154,ENSG00000164756,ENSG00000196660,ENSG00000145740
C27A12.7	C27A12.7	ENSG00000166233	ENSG00000166233	ENSG00000166233	ENSG00000166233
nft-1	Y56A3A.13	ENSG00000158793	ENSG00000158793	-	ENSG00000114021,ENSG00000158793
hmg-4	T20B12.8	ENSG00000149136	ENSG00000149136	ENSG00000149136	ENSG00000149136
ZK1067.2	ZK1067.2	ENSG00000124201	ENSG00000124201	-	ENSG00000124201
his-7	F45F2.4	ENSG00000184825,ENSG00000184348,ENSG00000182611,ENSG00000196787,ENSG00000196747,ENSG00000198374,ENSG00000233224,ENSG00000164508	ENSG00000180573,ENSG00000184270,ENSG00000183558,ENSG00000203812,ENSG00000181218,ENSG00000198374,ENSG00000196747,ENSG00000184348,ENSG00000196787,ENSG00000233224,ENSG00000184260,ENSG00000168274,ENSG00000137259,ENSG00000184825,ENSG00000164508,ENSG00000182611,ENSG00000197409,ENSG00000188486,ENSG00000263521	ENSG00000263965	ENSG00000184270,ENSG00000180573,ENSG00000188486,ENSG00000164508,ENSG00000182611,ENSG00000184348,ENSG00000198374,ENSG00000196747,ENSG00000196787,ENSG00000233224,ENSG00000184825,ENSG00000184260,ENSG00000137259,ENSG00000168274,ENSG00000203812,ENSG00000183558,ENSG00000196866,ENSG00000181218
fmo-4	F53F4.5	ENSG00000131781,ENSG00000215834,ENSG00000007933,ENSG00000010932,ENSG00000094963,ENSG00000076258,ENSG00000117507	-	ENSG00000087495	ENSG00000131781,ENSG00000215834,ENSG00000094963,ENSG00000117507,ENSG00000007933,ENSG00000010932
his-21	K06C4.3	ENSG00000184825,ENSG00000184348,ENSG00000182611,ENSG00000196787,ENSG00000196747,ENSG00000198374,ENSG00000233224,ENSG00000164508	-	ENSG00000263965	ENSG00000184270,ENSG00000180573,ENSG00000188486,ENSG00000164508,ENSG00000182611,ENSG00000184348,ENSG00000198374,ENSG00000196747,ENSG00000196787,ENSG00000233224,ENSG00000184825,ENSG00000184260,ENSG00000137259,ENSG00000168274,ENSG00000203812,ENSG00000183558,ENSG00000196866,ENSG00000181218
B0511.6	B0511.6	ENSG00000088205	ENSG00000088205	-	ENSG00000088205
C16A3.4	C16A3.4	ENSG00000173545	ENSG00000173545	ENSG00000173545	ENSG00000173545
pmp-5	T10H9.5	ENSG00000119688	-	-	-
dkf-1	W09C5.5	-	-	-	ENSG00000184304,ENSG00000115825,ENSG00000105287
tat-1	Y49E10.11	ENSG00000124406,ENSG00000132932	ENSG00000124406,ENSG00000132932	ENSG00000124406	ENSG00000081923,ENSG00000104043,ENSG00000130270,ENSG00000058063,ENSG00000101974,ENSG00000143515,ENSG00000068650,ENSG00000132932,ENSG00000124406
ptr-15	T07H8.6	ENSG00000182077,ENSG00000165186,ENSG00000178729,ENSG00000244694	-	-	-
glh-1	T21G5.3	ENSG00000152670	-	ENSG00000152670	-
nekl-4	D1044.8	ENSG00000163491	ENSG00000163491	ENSG00000087495	ENSG00000163491
vha-6	VW02B12L.1	ENSG00000033627,ENSG00000105929,ENSG00000110719,ENSG00000185344	-	-	ENSG00000033627,ENSG00000110719,ENSG00000105929,ENSG00000185344
his-16	ZK131.10	ENSG00000184825,ENSG00000184348,ENSG00000182611,ENSG00000196787,ENSG00000196747,ENSG00000198374,ENSG00000233224,ENSG00000164508	-	ENSG00000263965	ENSG00000184270,ENSG00000180573,ENSG00000188486,ENSG00000164508,ENSG00000182611,ENSG00000184348,ENSG00000198374,ENSG00000196747,ENSG00000196787,ENSG00000233224,ENSG00000184825,ENSG00000184260,ENSG00000137259,ENSG00000168274,ENSG00000203812,ENSG00000183558,ENSG00000196866,ENSG00000181218
cchl-1	T06D8.6	ENSG00000004961	ENSG00000004961	-	ENSG00000004961
tag-38	B0222.4	ENSG00000166224	-	ENSG00000166224	ENSG00000166224
ptr-13	K07C10.1	ENSG00000182077,ENSG00000165186,ENSG00000178729,ENSG00000244694	-	-	-
cmd-1	T21H3.3	-	ENSG00000160014,ENSG00000198668	ENSG00000165502	ENSG00000160014,ENSG00000198668,ENSG00000143933,ENSG00000178363
msh-2	H26D21.2	ENSG00000095002	ENSG00000095002	-	ENSG00000095002
gpx-2	R05H10.5	ENSG00000167468	ENSG00000167468	ENSG00000167468	ENSG00000167468,ENSG00000116157,ENSG00000164294
gro-1	ZC395.6	ENSG00000043514	ENSG00000043514	ENSG00000043514	ENSG00000043514
wht-3	C16C10.12	-	ENSG00000118777	-	ENSG00000172350,ENSG00000160179,ENSG00000118777,ENSG00000143921
his-9	ZK131.3	ENSG00000203818	-	ENSG00000203811	ENSG00000183598,ENSG00000203811,ENSG00000203852,ENSG00000132475,ENSG00000163041,ENSG00000112727,ENSG00000124693,ENSG00000178458,ENSG00000182572,ENSG00000198366,ENSG00000197153,ENSG00000196966,ENSG00000196532,ENSG00000203813,ENSG00000197409,ENSG00000203818
gdi-1	Y57G11C.10	ENSG00000203879,ENSG00000057608	ENSG00000057608	ENSG00000268690	ENSG00000057608,ENSG00000203879
rsks-1	Y47D3A.16	ENSG00000108443,ENSG00000175634	ENSG00000108443,ENSG00000175634	ENSG00000108443	ENSG00000108443,ENSG00000175634,ENSG00000117020,ENSG00000105221,ENSG00000142208,ENSG00000101049,ENSG00000104205,ENSG00000118515
hpo-5	T14G10.7	ENSG00000087111	ENSG00000087111	-	-
ccch-1	F38B7.1	ENSG00000152518,ENSG00000185650,ENSG00000128016	ENSG00000128016	-	ENSG00000152518
C01G10.8	C01G10.8	ENSG00000100591,ENSG00000173209	ENSG00000100591,ENSG00000173209	ENSG00000100591	ENSG00000100591,ENSG00000173209
Y82E9BR.3	Y82E9BR.3	ENSG00000154518,ENSG00000159199,ENSG00000135390	ENSG00000159199,ENSG00000154518,ENSG00000135390	ENSG00000159199	ENSG00000135390,ENSG00000159199,ENSG00000154518
agef-1	Y6B3A.1	ENSG00000066777,ENSG00000124198	ENSG00000066777,ENSG00000124198	ENSG00000066777	ENSG00000066777,ENSG00000124198
Y43C5B.3	Y43C5B.3	ENSG00000160785	ENSG00000160785	ENSG00000160785	ENSG00000160785
tat-4	T24H7.5	ENSG00000118322,ENSG00000145246,ENSG00000206190	-	-	ENSG00000145246,ENSG00000118322,ENSG00000206190
wht-1	C05D10.3	-	ENSG00000160179,ENSG00000172350	-	ENSG00000172350,ENSG00000160179,ENSG00000118777,ENSG00000143921
ZK1307.8	ZK1307.8	ENSG00000130175	ENSG00000130175	ENSG00000130175	ENSG00000130175
F11A10.6	F11A10.6	ENSG00000126062	ENSG00000126062	ENSG00000126062	ENSG00000126062
ZK858.6	ZK858.6	ENSG00000101337	ENSG00000101337	ENSG00000101337	ENSG00000101337,ENSG00000125304
lsy-12	R07B5.9	ENSG00000083168, ENSG00000136504, ENSG00000156650	-	-	-
Y105E8A.3	Y105E8A.3	-	ENSG00000145740	ENSG00000145740	ENSG00000162695,ENSG00000158014,ENSG00000170385,ENSG00000104154,ENSG00000164756,ENSG00000196660,ENSG00000145740
snrp-200	Y46G5A.4	-	ENSG00000144028	-	ENSG00000144028,ENSG00000112249
mrp-2	F57C12.4	ENSG00000103222,ENSG00000108846,ENSG00000023839,ENSG00000215557,ENSG00000091262	ENSG00000103222,ENSG00000108846,ENSG00000023839	ENSG00000103222	ENSG00000091262,ENSG00000069431,ENSG00000108846,ENSG00000006071,ENSG00000140798,ENSG00000114770,ENSG00000121270,ENSG00000023839,ENSG00000124574,ENSG00000125257,ENSG00000103222,ENSG00000233112
kpc-1	F11A6.1	-	ENSG00000140564,ENSG00000115257	ENSG00000140564	ENSG00000140564,ENSG00000115257,ENSG00000140479,ENSG00000160613,ENSG00000175426
sel-5	F35G12.3	ENSG00000138756,ENSG00000204113,ENSG00000115977	ENSG00000178950	-	ENSG00000138756,ENSG00000115977,ENSG00000204113
bec-1	T19E7.3	ENSG00000126581	ENSG00000126581	ENSG00000126581	ENSG00000126581
tag-257	F46G11.3	-	-	-	ENSG00000178950,ENSG00000116675
him-6	T04A11.6	ENSG00000197299	ENSG00000197299	-	ENSG00000165392,ENSG00000197299,ENSG00000004700
fem-2	T19C3.8	ENSG00000175175,ENSG00000163590,ENSG00000100034,ENSG00000163644	ENSG00000100034	ENSG00000100034	ENSG00000175175
his-12	ZK131.6	ENSG00000184825,ENSG00000184348,ENSG00000182611,ENSG00000196787,ENSG00000196747,ENSG00000198374,ENSG00000233224,ENSG00000164508	-	ENSG00000263965	ENSG00000184270,ENSG00000180573,ENSG00000188486,ENSG00000164508,ENSG00000182611,ENSG00000184348,ENSG00000198374,ENSG00000196747,ENSG00000196787,ENSG00000233224,ENSG00000184825,ENSG00000184260,ENSG00000137259,ENSG00000168274,ENSG00000203812,ENSG00000183558,ENSG00000196866,ENSG00000181218
oma-2	ZC513.6	-	ENSG00000152518,ENSG00000185650	-	-
cgh-1	C07H6.5	ENSG00000110367	ENSG00000110367	ENSG00000269612	ENSG00000110367
T24C4.5	T24C4.5	ENSG00000198056	ENSG00000198056	ENSG00000198056	ENSG00000198056
dkf-2	T25E12.4	ENSG00000105287,ENSG00000115825,ENSG00000184304	ENSG00000115825,ENSG00000105287	ENSG00000115825	ENSG00000184304,ENSG00000115825,ENSG00000105287
swsn-6	ZK616.4	ENSG00000077080,ENSG00000136518	ENSG00000077080,ENSG00000136518	-	ENSG00000077080,ENSG00000136518
rho-1	Y51H4A.3	ENSG00000067560,ENSG00000143878,ENSG00000155366	ENSG00000067560	ENSG00000155366	ENSG00000067560,ENSG00000143878
pmr-1	ZK256.1	ENSG00000017260,ENSG00000064270	ENSG00000017260,ENSG00000064270	ENSG00000017260	ENSG00000017260,ENSG00000064270,ENSG00000174437,ENSG00000196296,ENSG00000074370
pcn-1	W03D2.4	ENSG00000132646	ENSG00000132646	-	ENSG00000132646
ptr-3	C41D7.2	ENSG00000182077,ENSG00000165186,ENSG00000178729,ENSG00000244694	-	-	-
F30A10.3	F30A10.3	ENSG00000176095,ENSG00000068745,ENSG00000161896	ENSG00000068745,ENSG00000176095,ENSG00000161896	ENSG00000176095	ENSG00000176095,ENSG00000161896
gcsh-1	D1025.2	ENSG00000140905	ENSG00000140905	-	ENSG00000140905
klp-18	C06G3.2	ENSG00000163808	ENSG00000163808	ENSG00000163808	ENSG00000163808
C10H11.8	C10H11.8	ENSG00000167965	ENSG00000167965	-	ENSG00000167965
let-70	M7.1	-	ENSG00000078967	ENSG00000131508	ENSG00000131508,ENSG00000078967,ENSG00000072401,ENSG00000109332
his-61	F55G1.10	ENSG00000184825,ENSG00000184348,ENSG00000182611,ENSG00000196787,ENSG00000196747,ENSG00000198374,ENSG00000233224,ENSG00000164508	-	ENSG00000263965	ENSG00000184270,ENSG00000180573,ENSG00000188486,ENSG00000164508,ENSG00000182611,ENSG00000184348,ENSG00000198374,ENSG00000196747,ENSG00000196787,ENSG00000233224,ENSG00000184825,ENSG00000184260,ENSG00000137259,ENSG00000168274,ENSG00000203812,ENSG00000183558,ENSG00000196866,ENSG00000181218
pif-1	Y18H1A.6	ENSG00000140451	ENSG00000140451	ENSG00000140451	ENSG00000140451
Y53G8B.2	Y53G8B.2	ENSG00000062282,ENSG00000166391,ENSG00000204195,ENSG00000205267,ENSG00000106384,ENSG00000184210,ENSG00000124003	ENSG00000124003,ENSG00000062282	ENSG00000124003	-
F45G2.10	F45G2.10	ENSG00000166595	ENSG00000166595	ENSG00000166595	ENSG00000166595
pars-1	T20H4.3	ENSG00000136628	-	-	ENSG00000136628
F29B9.1	F29B9.1	ENSG00000203791	ENSG00000203791	ENSG00000203791	ENSG00000203791
wht-2	C10C6.5	-	ENSG00000118777	-	ENSG00000172350,ENSG00000160179,ENSG00000118777,ENSG00000143921
his-71	F45E1.6	-	ENSG00000196285,ENSG00000163041,ENSG00000132475	ENSG00000163041	ENSG00000183598,ENSG00000203811,ENSG00000203852,ENSG00000132475,ENSG00000163041,ENSG00000112727,ENSG00000124693,ENSG00000178458,ENSG00000182572,ENSG00000198366,ENSG00000197153,ENSG00000196966,ENSG00000196532,ENSG00000203813,ENSG00000197409,ENSG00000203818
lsm-5	F28F8.3	ENSG00000106355	ENSG00000106355	ENSG00000106355	ENSG00000106355
vps-33.2	C56C10.1	ENSG00000184056	ENSG00000184056,ENSG00000139719	ENSG00000184056	ENSG00000139719,ENSG00000184056
B0491.1	B0491.1	ENSG00000143315	ENSG00000143315	ENSG00000143315	ENSG00000143315
F13G3.7	F13G3.7	ENSG00000160785	ENSG00000160785	ENSG00000160785	ENSG00000160785
K02F3.12	K02F3.12	ENSG00000004700	ENSG00000004700	ENSG00000004700	ENSG00000165392,ENSG00000197299,ENSG00000004700
C25H3.4	C25H3.4	ENSG00000143486	ENSG00000143486	-	ENSG00000143486
mrp-4	F21G4.2	ENSG00000103222,ENSG00000108846,ENSG00000023839,ENSG00000215557,ENSG00000091262	-	ENSG00000108846	ENSG00000091262,ENSG00000069431,ENSG00000108846,ENSG00000006071,ENSG00000140798,ENSG00000114770,ENSG00000121270,ENSG00000023839,ENSG00000124574,ENSG00000125257,ENSG00000103222,ENSG00000233112
his-35	C50F4.13	ENSG00000184825,ENSG00000184348,ENSG00000182611,ENSG00000196787,ENSG00000196747,ENSG00000198374,ENSG00000233224,ENSG00000164508	ENSG00000180573,ENSG00000184270,ENSG00000183558,ENSG00000203812,ENSG00000181218,ENSG00000198374,ENSG00000196747,ENSG00000184348,ENSG00000196787,ENSG00000233224,ENSG00000184260,ENSG00000168274,ENSG00000137259,ENSG00000184825,ENSG00000164508,ENSG00000182611,ENSG00000197409,ENSG00000188486,ENSG00000263521	ENSG00000263965	ENSG00000184270,ENSG00000180573,ENSG00000188486,ENSG00000164508,ENSG00000182611,ENSG00000184348,ENSG00000198374,ENSG00000196747,ENSG00000196787,ENSG00000233224,ENSG00000184825,ENSG00000184260,ENSG00000137259,ENSG00000168274,ENSG00000203812,ENSG00000183558,ENSG00000196866,ENSG00000181218
hmg-3	C32F10.5	ENSG00000149136	ENSG00000149136	ENSG00000149136	ENSG00000149136
rep-1	Y67D2.1	ENSG00000188419,ENSG00000203668	ENSG00000188419,ENSG00000203668	ENSG00000203668	ENSG00000188419,ENSG00000203668
rps-10	D1007.6	ENSG00000101278,ENSG00000124614	ENSG00000101278,ENSG00000124614,ENSG00000215464	ENSG00000124614	ENSG00000124614,ENSG00000101278
C36E8.1	C36E8.1	ENSG00000085721,ENSG00000179038,ENSG00000103472,ENSG00000232297	ENSG00000085721	ENSG00000085721	ENSG00000085721,ENSG00000103472
ife-1	F53A2.6	ENSG00000151247,ENSG00000175766	-	-	-
usp-46	R10E11.3	ENSG00000109189,ENSG00000152484	ENSG00000109189,ENSG00000152484	-	ENSG00000109189,ENSG00000152484
fkb-2	Y18D10A.19	ENSG00000088832,ENSG00000198225,ENSG00000119782	ENSG00000088832,ENSG00000198225,ENSG00000119782	-	ENSG00000088832,ENSG00000096060,ENSG00000004478,ENSG00000119782
cyb-2.2	H31G24.4	ENSG00000157456,ENSG00000134057	ENSG00000134057,ENSG00000157456	-	ENSG00000145386,ENSG00000147082,ENSG00000134057,ENSG00000157456,ENSG00000133101
plk-3	F55G1.8	ENSG00000166851,ENSG00000237810	-	-	ENSG00000166851,ENSG00000145632,ENSG00000173846
ears-1	ZC434.5	-	ENSG00000136628	-	-
gyg-1	F56B6.4	ENSG00000163754,ENSG00000056998,ENSG00000206159	ENSG00000163754,ENSG00000056998	-	ENSG00000163754,ENSG00000056998
cts-1	T20G5.2	ENSG00000062485	ENSG00000062485	ENSG00000062485	ENSG00000062485
his-19	K06C4.11	ENSG00000184825,ENSG00000184348,ENSG00000182611,ENSG00000196787,ENSG00000196747,ENSG00000198374,ENSG00000233224,ENSG00000164508	-	ENSG00000263965	ENSG00000184270,ENSG00000180573,ENSG00000188486,ENSG00000164508,ENSG00000182611,ENSG00000184348,ENSG00000198374,ENSG00000196747,ENSG00000196787,ENSG00000233224,ENSG00000184825,ENSG00000184260,ENSG00000137259,ENSG00000168274,ENSG00000203812,ENSG00000183558,ENSG00000196866,ENSG00000181218
rab-21	T01B7.3	ENSG00000080371	ENSG00000080371	ENSG00000080371	ENSG00000080371
cul-5	ZK856.1	ENSG00000166266	ENSG00000166266	ENSG00000166266	ENSG00000166266
hmit-1.1	Y51A2D.4	ENSG00000151229	ENSG00000151229	ENSG00000151229	ENSG00000136856,ENSG00000151229
his-2	T10C6.13	ENSG00000203818	-	ENSG00000203811	ENSG00000183598,ENSG00000203811,ENSG00000203852,ENSG00000132475,ENSG00000163041,ENSG00000112727,ENSG00000124693,ENSG00000178458,ENSG00000182572,ENSG00000198366,ENSG00000197153,ENSG00000196966,ENSG00000196532,ENSG00000203813,ENSG00000197409,ENSG00000203818
dut-1	K07A1.2	ENSG00000128951,ENSG00000229048	-	ENSG00000128951	ENSG00000128951
akt-2	F28H6.1	ENSG00000105221,ENSG00000117020,ENSG00000142208	ENSG00000142208,ENSG00000105221,ENSG00000117020	ENSG00000142208	ENSG00000108443,ENSG00000175634,ENSG00000117020,ENSG00000105221,ENSG00000142208,ENSG00000101049,ENSG00000104205,ENSG00000118515
nars-2	Y66D12A.23	ENSG00000137513	ENSG00000137513	-	ENSG00000134440,ENSG00000137513
tag-173	F27D4.5	ENSG00000083123	ENSG00000083123	ENSG00000083123	ENSG00000083123
exc-7	F35H8.5	ENSG00000162374,ENSG00000196361,ENSG00000107105,ENSG00000066044	ENSG00000196361,ENSG00000162374,ENSG00000107105,ENSG00000066044	ENSG00000066044	ENSG00000107105,ENSG00000162374,ENSG00000157870,ENSG00000196361
app-1	W03G9.4	ENSG00000108039,ENSG00000122121	ENSG00000108039	ENSG00000108039	ENSG00000108039
F31C3.3	F31C3.3	ENSG00000007202	ENSG00000007202	ENSG00000007202	ENSG00000007202
istr-1	K10C8.3	ENSG00000182149	ENSG00000182149	ENSG00000182149	ENSG00000182149
F31D4.2	F31D4.2	ENSG00000146476	ENSG00000146476	ENSG00000146476	ENSG00000146476
ptr-18	Y38F1A.3	ENSG00000182077,ENSG00000165186,ENSG00000178729,ENSG00000244694	-	-	-
cel-1	C03D6.3	ENSG00000111880	ENSG00000111880	ENSG00000111880	ENSG00000111880
T03G6.3	T03G6.3	ENSG00000164303	ENSG00000164303,ENSG00000182156	ENSG00000164303	ENSG00000164303
atg-5	Y71G12B.12	ENSG00000057663	ENSG00000057663	ENSG00000057663	ENSG00000057663
mys-2	K03D10.3	ENSG00000103510	ENSG00000103510	ENSG00000103510	ENSG00000103510,ENSG00000172977,ENSG00000136504
T08G11.4	T08G11.4	ENSG00000137574	ENSG00000137574	-	ENSG00000137574
swd-2.1	C33H5.6	ENSG00000164091	-	-	-
ZK669.4	ZK669.4	ENSG00000137992	ENSG00000137992	ENSG00000137992	ENSG00000137992
ZK550.3	ZK550.3	ENSG00000172009,ENSG00000123213	ENSG00000172009,ENSG00000123213	-	ENSG00000172009,ENSG00000123213
Y71G12B.8	Y71G12B.8	ENSG00000124228	ENSG00000124228	ENSG00000124228	ENSG00000124228
rpoa-12	C15H11.8	ENSG00000066379	ENSG00000066379,ENSG00000206502,ENSG00000206429	-	ENSG00000066379,ENSG00000206502,ENSG00000235443,ENSG00000233795,ENSG00000224859,ENSG00000235176,ENSG00000236949,ENSG00000236808
ptr-1	C24B5.3	ENSG00000182077,ENSG00000165186,ENSG00000178729,ENSG00000244694	-	-	-
hda-5	F43G6.11	-	ENSG00000100429	-	-
nkat-3	R03A10.4	ENSG00000171097,ENSG00000137944	ENSG00000137944,ENSG00000171097	ENSG00000137944	ENSG00000137944,ENSG00000171097
rict-1	F29C12.3	ENSG00000164327	ENSG00000164327	-	ENSG00000164327
K11H3.3	K11H3.3	ENSG00000100075	ENSG00000100075	ENSG00000268928	ENSG00000100075
puf-9	W06B11.2	-	ENSG00000134644,ENSG00000055917	-	ENSG00000055917,ENSG00000134644
K08H10.6	K08H10.6	ENSG00000136856,ENSG00000160326	-	-	-
B0336.13	B0336.13	ENSG00000140307	-	-	ENSG00000140307
his-68	T23D8.6	ENSG00000184825,ENSG00000184348,ENSG00000182611,ENSG00000196787,ENSG00000196747,ENSG00000198374,ENSG00000233224,ENSG00000164508	-	ENSG00000263965	ENSG00000184270,ENSG00000180573,ENSG00000188486,ENSG00000164508,ENSG00000182611,ENSG00000184348,ENSG00000198374,ENSG00000196747,ENSG00000196787,ENSG00000233224,ENSG00000184825,ENSG00000184260,ENSG00000137259,ENSG00000168274,ENSG00000203812,ENSG00000183558,ENSG00000196866,ENSG00000181218
catp-5	K07E3.7	ENSG00000133657,ENSG00000127249,ENSG00000187527,ENSG00000159363	ENSG00000133657,ENSG00000127249,ENSG00000187527	-	ENSG00000159363,ENSG00000127249,ENSG00000187527,ENSG00000133657
Y111B2A.13	Y111B2A.13	ENSG00000140307	ENSG00000140307	ENSG00000140307	ENSG00000140307
rpb-7	Y54E10BR.6	ENSG00000168002	ENSG00000168002	ENSG00000168002	ENSG00000168002
wee-1.1	F35H8.7	ENSG00000127564	ENSG00000127564	-	-
chk-1	Y39H10A.7	ENSG00000149554	ENSG00000149554	ENSG00000149554	ENSG00000149554
rpoa-2	F14B4.3	ENSG00000125630	ENSG00000125630	ENSG00000125630	ENSG00000125630
smut-1	Y38A10A.6	ENSG00000152670	-	-	-
ptr-19	Y39A1B.2	ENSG00000182077,ENSG00000165186,ENSG00000178729,ENSG00000244694	ENSG00000165186,ENSG00000178729	-	ENSG00000182077
his-33	F17E9.13	ENSG00000184825,ENSG00000184348,ENSG00000182611,ENSG00000196787,ENSG00000196747,ENSG00000198374,ENSG00000233224,ENSG00000164508	-	ENSG00000263965	ENSG00000184270,ENSG00000180573,ENSG00000188486,ENSG00000164508,ENSG00000182611,ENSG00000184348,ENSG00000198374,ENSG00000196747,ENSG00000196787,ENSG00000233224,ENSG00000184825,ENSG00000184260,ENSG00000137259,ENSG00000168274,ENSG00000203812,ENSG00000183558,ENSG00000196866,ENSG00000181218
adsl-1	R06C7.5	ENSG00000239900	ENSG00000239900	-	ENSG00000239900
hpo-16	M02B7.4	ENSG00000172339	ENSG00000172339	-	ENSG00000172339
ucr-1	F56D2.1	ENSG00000105819,ENSG00000010256	-	ENSG00000010256	-
jmjd-1.2	F29B9.2	ENSG00000006459,ENSG00000172943,ENSG00000197724	ENSG00000172943,ENSG00000197724,ENSG00000006459	-	ENSG00000172943,ENSG00000197724,ENSG00000006459
tbc-17	Y46G5A.1	ENSG00000148429,ENSG00000197681,ENSG00000185128,ENSG00000242384,ENSG00000161583,ENSG00000234972,ENSG00000224226,ENSG00000214946,ENSG00000189375,ENSG00000238283,ENSG00000188755	-	-	ENSG00000148429
tat-2	H06H21.10	ENSG00000143515,ENSG00000104043	ENSG00000143515,ENSG00000104043,ENSG00000081923	ENSG00000143515	ENSG00000081923,ENSG00000104043,ENSG00000130270,ENSG00000058063,ENSG00000101974,ENSG00000143515,ENSG00000068650,ENSG00000132932,ENSG00000124406
F59A7.8	F59A7.8	ENSG00000116830	ENSG00000116830	-	-
Y39G8B.5	Y39G8B.5	ENSG00000104365,ENSG00000213341,ENSG00000183735,ENSG00000143466	-	-	-
pptr-1	W08G11.4	ENSG00000068971,ENSG00000066027,ENSG00000154001	ENSG00000154001,ENSG00000066027,ENSG00000068971	ENSG00000154001	ENSG00000078304,ENSG00000154001,ENSG00000112640,ENSG00000068971,ENSG00000066027
sax-2	F21H11.2	ENSG00000073910,ENSG00000075539	ENSG00000075539	ENSG00000075539	ENSG00000075539,ENSG00000073910
pph-4.1	Y75B8A.30	ENSG00000149923	ENSG00000149923	ENSG00000149923	ENSG00000149923
F57C9.1	F57C9.1	ENSG00000160209	ENSG00000160209	ENSG00000160209	ENSG00000160209
ttx-7	F13G3.5	ENSG00000133731,ENSG00000141401	ENSG00000133731,ENSG00000141401	ENSG00000133731	ENSG00000133731,ENSG00000141401
cdk-2	K03E5.3	ENSG00000123374,ENSG00000108504	-	-	-
rfc-4	F31E3.3	ENSG00000163918	ENSG00000163918	-	ENSG00000163918
D1005.2	D1005.2	-	-	-	ENSG00000172269
C27A7.3	C27A7.3	ENSG00000136960,ENSG00000197594,ENSG00000154269	ENSG00000154269,ENSG00000136960	ENSG00000197594	ENSG00000136960,ENSG00000197594,ENSG00000154269,ENSG00000112796
C01G10.10	C01G10.10	ENSG00000128694	ENSG00000128694	ENSG00000128694	ENSG00000092094,ENSG00000128694
ubh-2	Y40G12A.2	ENSG00000118939,ENSG00000154277	ENSG00000154277,ENSG00000118939	-	ENSG00000154277
eif-1	T27F7.3	ENSG00000069943	-	-	ENSG00000069943
plk-1	C14B9.4	ENSG00000166851,ENSG00000237810	ENSG00000166851	ENSG00000166851	ENSG00000166851,ENSG00000145632,ENSG00000173846
pad-1	Y18D10A.13	ENSG00000083097,ENSG00000142197	ENSG00000083097,ENSG00000142197	ENSG00000083097	ENSG00000083097,ENSG00000142197
aka-1	D1022.7	ENSG00000157077,ENSG00000235048,ENSG00000039319	ENSG00000039319,ENSG00000157077	-	ENSG00000157077,ENSG00000039319
T08D2.8	T08D2.8	ENSG00000175216	-	-	-
cln-3.3	ZC190.1	ENSG00000188603	ENSG00000188603	ENSG00000188603	ENSG00000188603
rde-12	F58G11.2	ENSG00000152670	-	-	-
F10E7.5	F10E7.5	ENSG00000053372	ENSG00000053372	ENSG00000053372	ENSG00000053372
rad-26	C27B7.4	ENSG00000164080	ENSG00000164080	-	ENSG00000164080
ntl-2	B0286.4	ENSG00000111596	ENSG00000111596	-	ENSG00000111596
gmps-1	M106.4	ENSG00000163655	ENSG00000163655	ENSG00000163655	ENSG00000163655
cln-3.2	C01G8.2	ENSG00000188603	ENSG00000188603	ENSG00000188603	ENSG00000188603
cyn-8	D1009.2	ENSG00000138398,ENSG00000114857	ENSG00000138398	ENSG00000138398	ENSG00000138398,ENSG00000114857
F55F10.1	F55F10.1	ENSG00000112159	ENSG00000112159	-	ENSG00000112159
B0511.13	B0511.13	ENSG00000154889	ENSG00000154889	ENSG00000154889	ENSG00000154889
R06C1.4	R06C1.4	ENSG00000101811,ENSG00000177613	ENSG00000197038,ENSG00000131003,ENSG00000102317	-	-
xpo-3	C49H3.10	ENSG00000184575	ENSG00000184575	ENSG00000184575	ENSG00000184575
ptr-8	F44F4.4	ENSG00000182077,ENSG00000165186,ENSG00000178729,ENSG00000244694	-	-	-
sec-31	T01G1.3	ENSG00000138674,ENSG00000075826	ENSG00000138674,ENSG00000075826	-	ENSG00000075826,ENSG00000138674
rpl-27	C53H9.1	ENSG00000131469,ENSG00000213867	ENSG00000131469	ENSG00000131469	ENSG00000131469
glh-3	B0414.6	ENSG00000152670	-	ENSG00000152670	-
mrck-1	K08B12.5	ENSG00000171219,ENSG00000143776,ENSG00000198752,ENSG00000104936	ENSG00000143776,ENSG00000198752,ENSG00000171219	ENSG00000143776	ENSG00000143776,ENSG00000171219,ENSG00000198752
his-32	F17E9.10	ENSG00000203818	-	ENSG00000203811	ENSG00000183598,ENSG00000203811,ENSG00000203852,ENSG00000132475,ENSG00000163041,ENSG00000112727,ENSG00000124693,ENSG00000178458,ENSG00000182572,ENSG00000198366,ENSG00000197153,ENSG00000196966,ENSG00000196532,ENSG00000203813,ENSG00000197409,ENSG00000203818
ubr-1	C32E8.11	ENSG00000024048,ENSG00000159459	ENSG00000024048,ENSG00000159459	-	ENSG00000159459,ENSG00000024048
T24H10.1	T24H10.1	ENSG00000176896	ENSG00000187735,ENSG00000171703,ENSG00000204219	ENSG00000187735	ENSG00000187735,ENSG00000204219
kat-1	T02G5.8	ENSG00000075239	ENSG00000075239	ENSG00000075239	ENSG00000075239,ENSG00000120437,ENSG00000167315
xpf-1	C47D12.8	ENSG00000175595	ENSG00000175595	-	ENSG00000175595
Y92H12A.5	Y92H12A.5	ENSG00000115970	ENSG00000115970	-	ENSG00000115970
W09C5.1	W09C5.1	ENSG00000164346	ENSG00000164346	ENSG00000164346	ENSG00000164346
Y37E3.17	Y37E3.17	ENSG00000132837	ENSG00000132837	ENSG00000132837	ENSG00000123453,ENSG00000132837
evl-20	F22B5.1	ENSG00000213465	ENSG00000213465	ENSG00000213465	ENSG00000213465
dgtr-1	W01A11.2	ENSG00000062282,ENSG00000166391,ENSG00000204195,ENSG00000205267,ENSG00000106384,ENSG00000184210,ENSG00000124003	ENSG00000166391	-	ENSG00000166391,ENSG00000124003,ENSG00000062282,ENSG00000184210
isw-1	F37A4.8	ENSG00000153147,ENSG00000102038	ENSG00000102038,ENSG00000153147	ENSG00000102038	ENSG00000153147,ENSG00000102038
pst-1	M03F8.2	ENSG00000157593	ENSG00000157593	ENSG00000157593	ENSG00000157593
pst-2	F54E7.1	ENSG00000124786	ENSG00000124786	ENSG00000124786	ENSG00000124786
F09C12.2	F09C12.2	ENSG00000166484	-	-	-
F20C5.4	F20C5.4	ENSG00000182107,ENSG00000112697,ENSG00000235156	-	-	-
W02A11.1	W02A11.1	ENSG00000166166	ENSG00000166166	ENSG00000166166	ENSG00000166166,ENSG00000171103
orc-1	Y39A1A.12	ENSG00000085840	ENSG00000085840	-	ENSG00000085840,ENSG00000094804
nst-1	K01C8.9	ENSG00000163938,ENSG00000130119	ENSG00000130119	ENSG00000130119	ENSG00000130119,ENSG00000163938
ddx-23	F01F1.7	ENSG00000174243,ENSG00000118197	ENSG00000174243	ENSG00000174243	ENSG00000174243
bris-1	M02B7.5	ENSG00000120645,ENSG00000124313,ENSG00000144711,ENSG00000164117	ENSG00000124313,ENSG00000144711,ENSG00000120645	ENSG00000144711	ENSG00000120645,ENSG00000124313,ENSG00000144711
prp-4	C36B1.5	ENSG00000136875	ENSG00000136875	ENSG00000136875	ENSG00000136875
R53.2	R53.2	ENSG00000168393	ENSG00000168393	ENSG00000168393	ENSG00000168393
dnj-12	F39B2.10	ENSG00000086061,ENSG00000140403	ENSG00000086061,ENSG00000140403	ENSG00000086061	ENSG00000086061,ENSG00000069345,ENSG00000140403
dhc-1	T21E12.4	ENSG00000197102	ENSG00000197102	ENSG00000197102	ENSG00000158486,ENSG00000007174,ENSG00000039139,ENSG00000114841,ENSG00000174844,ENSG00000118997,ENSG00000124721,ENSG00000197102,ENSG00000183914,ENSG00000115423,ENSG00000187775,ENSG00000187240,ENSG00000197653,ENSG00000105877,ENSG00000185842
cpt-2	R07H5.2	ENSG00000157184	ENSG00000157184	ENSG00000157184	ENSG00000157184
cpsf-2	F09G2.4	ENSG00000165934	ENSG00000165934	ENSG00000165934	ENSG00000165934
Y57E12AL.1	Y57E12AL.1	ENSG00000132824,ENSG00000111897,ENSG00000168528,ENSG00000164300,ENSG00000184716	ENSG00000111897,ENSG00000132824,ENSG00000168528	ENSG00000111897	ENSG00000111897,ENSG00000132824,ENSG00000168528
his-42	F08G2.3	ENSG00000203818	-	ENSG00000203811	ENSG00000183598,ENSG00000203811,ENSG00000203852,ENSG00000132475,ENSG00000163041,ENSG00000112727,ENSG00000124693,ENSG00000178458,ENSG00000182572,ENSG00000198366,ENSG00000197153,ENSG00000196966,ENSG00000196532,ENSG00000203813,ENSG00000197409,ENSG00000203818
R02D3.3	R02D3.3	ENSG00000110768	ENSG00000110768	ENSG00000110768	ENSG00000110768
pgk-1	T03F1.3	ENSG00000102144,ENSG00000170950	ENSG00000102144,ENSG00000170950	ENSG00000269666	ENSG00000170950,ENSG00000102144
cni-1	T09E8.3	ENSG00000100528,ENSG00000143786,ENSG00000174871	ENSG00000100528,ENSG00000143786,ENSG00000174871	-	ENSG00000100528,ENSG00000143771
B0303.11	B0303.11	ENSG00000064651,ENSG00000074803,ENSG00000070915	-	-	-
ndc-80	W01B6.9	ENSG00000080986	ENSG00000080986	ENSG00000080986	ENSG00000080986
phf-5	Y54F10BM.14	ENSG00000100410	ENSG00000100410	ENSG00000100410	ENSG00000100410
wdr-5.2	K04G11.4	ENSG00000196363,ENSG00000196981	-	-	-
htas-1	ZK1251.1	ENSG00000113648,ENSG00000099284	-	-	ENSG00000184270,ENSG00000180573,ENSG00000188486,ENSG00000164508,ENSG00000182611,ENSG00000184348,ENSG00000198374,ENSG00000196747,ENSG00000196787,ENSG00000233224,ENSG00000184825,ENSG00000184260,ENSG00000137259,ENSG00000168274,ENSG00000203812,ENSG00000183558,ENSG00000196866,ENSG00000181218
xpc-1	Y76B12C.2	ENSG00000154767	ENSG00000154767	-	ENSG00000154767
glh-2	C55B7.1	ENSG00000152670	-	ENSG00000152670	-
E04D5.1	E04D5.1	ENSG00000144895	ENSG00000144895	ENSG00000144895	ENSG00000144895
crn-1	Y47G6A.8	ENSG00000168496	ENSG00000168496	ENSG00000168496	ENSG00000168496
Y45G5AM.2	Y45G5AM.2	ENSG00000108039,ENSG00000122121	ENSG00000108039	ENSG00000108039	-
mrp-1	F57C12.5	ENSG00000103222,ENSG00000108846,ENSG00000023839,ENSG00000215557,ENSG00000091262	ENSG00000103222,ENSG00000108846,ENSG00000023839	ENSG00000103222	ENSG00000091262,ENSG00000069431,ENSG00000108846,ENSG00000006071,ENSG00000140798,ENSG00000114770,ENSG00000121270,ENSG00000023839,ENSG00000124574,ENSG00000125257,ENSG00000103222,ENSG00000233112
T07F10.3	T07F10.3	ENSG00000180098,ENSG00000137434	-	-	ENSG00000180098
Y61A9LA.1	Y61A9LA.1	ENSG00000136856,ENSG00000160326	-	-	-
Y6B3B.9	Y6B3B.9	ENSG00000001497	-	-	-
nkat-1	F28H6.3	ENSG00000171097,ENSG00000137944	ENSG00000137944,ENSG00000171097	ENSG00000137944	ENSG00000137944,ENSG00000171097
Y105E8A.19	Y105E8A.19	ENSG00000134684	-	-	ENSG00000134684
his-13	ZK131.7	ENSG00000203818	-	ENSG00000203811	ENSG00000183598,ENSG00000203811,ENSG00000203852,ENSG00000132475,ENSG00000163041,ENSG00000112727,ENSG00000124693,ENSG00000178458,ENSG00000182572,ENSG00000198366,ENSG00000197153,ENSG00000196966,ENSG00000196532,ENSG00000203813,ENSG00000197409,ENSG00000203818
ptr-10	F55F8.1	ENSG00000182077,ENSG00000165186,ENSG00000178729,ENSG00000244694	ENSG00000165186,ENSG00000178729	-	ENSG00000182077
set-23	Y41D4B.12	-	ENSG00000136169,ENSG00000143379	ENSG00000087495	ENSG00000170364
rev-1	ZK675.2	ENSG00000135945	ENSG00000135945	-	ENSG00000135945
coq-4	T03F1.2	ENSG00000167113	ENSG00000167113	ENSG00000167113	ENSG00000167113
rpl-37	C54C6.1	ENSG00000145592	ENSG00000145592	ENSG00000145592	ENSG00000145592
Y119D3B.12	Y119D3B.12	ENSG00000108848	-	-	-
klp-7	K11D9.1	ENSG00000142945,ENSG00000141200,ENSG00000068796	ENSG00000068796,ENSG00000141200,ENSG00000142945	ENSG00000068796	ENSG00000141200,ENSG00000142945,ENSG00000068796,ENSG00000186638
F46B6.6	F46B6.6	ENSG00000085760	ENSG00000085760	ENSG00000085760	ENSG00000085760
cul-3	Y108G3AL.1	ENSG00000036257	ENSG00000036257	ENSG00000036257	ENSG00000036257
mrp-5	F14F4.3	ENSG00000114770,ENSG00000140798,ENSG00000121270	ENSG00000114770,ENSG00000140798,ENSG00000121270	ENSG00000114770	ENSG00000091262,ENSG00000069431,ENSG00000108846,ENSG00000006071,ENSG00000140798,ENSG00000114770,ENSG00000121270,ENSG00000023839,ENSG00000124574,ENSG00000125257,ENSG00000103222,ENSG00000233112
C27A7.1	C27A7.1	ENSG00000136960,ENSG00000197594,ENSG00000154269	ENSG00000154269,ENSG00000136960	ENSG00000197594	ENSG00000136960,ENSG00000197594,ENSG00000154269,ENSG00000112796
ing-3	Y51H1A.4	ENSG00000071243,ENSG00000111653,ENSG00000168395,ENSG00000168556,ENSG00000153487	ENSG00000071243	ENSG00000071243	ENSG00000071243
trx-1	B0228.5	-	ENSG00000136810,ENSG00000204193	-	ENSG00000100348,ENSG00000136810
aak-2	T01C8.1	ENSG00000132356,ENSG00000162409	ENSG00000162409,ENSG00000132356	ENSG00000162409	ENSG00000160469,ENSG00000174672,ENSG00000132356,ENSG00000162409
puf-3	Y45F10A.2	ENSG00000134644,ENSG00000055917	-	-	-
scc-3	F18E2.3	ENSG00000101972,ENSG00000118007,ENSG00000066923,ENSG00000160828,ENSG00000205583,ENSG00000174353,ENSG00000243668,ENSG00000106610	ENSG00000101972,ENSG00000118007,ENSG00000066923	ENSG00000101972	ENSG00000101972,ENSG00000118007,ENSG00000066923
ymel-1	M03C11.5	ENSG00000136758	ENSG00000136758	-	ENSG00000141385,ENSG00000136758
mcm-3	C25D7.6	ENSG00000112118	ENSG00000112118	-	ENSG00000112118
C35A11.4	C35A11.4	ENSG00000136856,ENSG00000160326	-	-	-
ptr-22	Y80D3A.7	ENSG00000182077,ENSG00000165186,ENSG00000178729,ENSG00000244694	-	-	-
Y39B6A.36	Y39B6A.36	ENSG00000188342	ENSG00000188342	ENSG00000188342	ENSG00000188342
R11H6.2	R11H6.2	ENSG00000132824,ENSG00000111897,ENSG00000168528,ENSG00000164300,ENSG00000184716	ENSG00000111897,ENSG00000132824,ENSG00000168528	ENSG00000111897	ENSG00000111897,ENSG00000132824,ENSG00000168528
C30B5.2	C30B5.2	ENSG00000213625,ENSG00000104660	ENSG00000104660,ENSG00000213625	ENSG00000104660	ENSG00000213625,ENSG00000104660
mut-14	C14C11.6	ENSG00000152670	-	-	-
C23G10.7	C23G10.7	ENSG00000155275	ENSG00000155275	-	ENSG00000155275
moe-3	F32A11.6	-	ENSG00000152518,ENSG00000185650	-	-
rpc-2	F09F7.3	ENSG00000013503	ENSG00000013503	ENSG00000013503	ENSG00000013503,ENSG00000047315
hda-1	C53A5.3	ENSG00000116478,ENSG00000196591	ENSG00000116478,ENSG00000196591	ENSG00000116478	ENSG00000116478,ENSG00000196591,ENSG00000171720
cdc-25.1	K06A5.7	ENSG00000164045,ENSG00000158402,ENSG00000101224	-	-	ENSG00000101224,ENSG00000164045,ENSG00000158402
coq-2	F57B9.4	ENSG00000173085	ENSG00000173085	ENSG00000173085	ENSG00000173085
mrp-7	Y43F8C.12	ENSG00000103222,ENSG00000108846,ENSG00000023839,ENSG00000215557,ENSG00000091262	-	-	ENSG00000091262,ENSG00000069431,ENSG00000108846,ENSG00000006071,ENSG00000140798,ENSG00000114770,ENSG00000121270,ENSG00000023839,ENSG00000124574,ENSG00000125257,ENSG00000103222,ENSG00000233112
his-55	F54E12.1	ENSG00000203818	-	ENSG00000203811	ENSG00000183598,ENSG00000203811,ENSG00000203852,ENSG00000132475,ENSG00000163041,ENSG00000112727,ENSG00000124693,ENSG00000178458,ENSG00000182572,ENSG00000198366,ENSG00000197153,ENSG00000196966,ENSG00000196532,ENSG00000203813,ENSG00000197409,ENSG00000203818
cdk-8	F39H11.3	ENSG00000132964,ENSG00000155111	ENSG00000155111,ENSG00000132964	ENSG00000132964	ENSG00000155111,ENSG00000132964
unc-26	JC8.10	ENSG00000159082,ENSG00000078269	ENSG00000159082,ENSG00000078269	ENSG00000159082	ENSG00000078269,ENSG00000159082
pri-1	F58A4.4	ENSG00000198056	ENSG00000198056	ENSG00000198056	ENSG00000198056
hpo-17	R10D12.12	-	-	-	ENSG00000101901
tag-120	F40F9.2	ENSG00000178719,ENSG00000135472,ENSG00000135926	ENSG00000135472,ENSG00000135926,ENSG00000178719	ENSG00000135472	ENSG00000178719,ENSG00000155957,ENSG00000135926
mat-1	Y110A7A.17	ENSG00000004897	ENSG00000004897	-	ENSG00000004897
imp-1	C36B1.12	ENSG00000005206,ENSG00000138600,ENSG00000185294	ENSG00000138600,ENSG00000185294	-	ENSG00000005206,ENSG00000138600
him-1	F28B3.7	ENSG00000072501,ENSG00000077935	ENSG00000072501,ENSG00000077935	ENSG00000269384	ENSG00000072501,ENSG00000077935
rps-2	C49H3.11	ENSG00000197149,ENSG00000214255,ENSG00000228981,ENSG00000140988,ENSG00000196183	ENSG00000140988,ENSG00000197149	ENSG00000140988	ENSG00000140988
aars-2	F28H1.3	ENSG00000090861	ENSG00000090861	-	ENSG00000124608,ENSG00000090861
pph-4.2	Y49E10.3	ENSG00000149923	-	-	ENSG00000149923
xpb-1	Y66D12A.15	ENSG00000163161	ENSG00000163161	ENSG00000163161	ENSG00000163161
wht-5	F19B6.4	-	ENSG00000160179,ENSG00000172350	ENSG00000160179	ENSG00000172350,ENSG00000160179,ENSG00000118777,ENSG00000143921
sca-1	K11D9.2	ENSG00000196296,ENSG00000174437,ENSG00000074370	ENSG00000196296,ENSG00000174437,ENSG00000074370	ENSG00000196296	ENSG00000017260,ENSG00000064270,ENSG00000174437,ENSG00000196296,ENSG00000074370
snr-1	Y116A8C.42	ENSG00000100028	ENSG00000100028	ENSG00000100028	ENSG00000100028
B0280.17	B0280.17	ENSG00000112232,ENSG00000131773,ENSG00000121774	-	-	-
pmp-1	C44B7.8	ENSG00000117528	ENSG00000117528	ENSG00000117528	ENSG00000117528,ENSG00000101986,ENSG00000173208,ENSG00000119688
vbh-1	Y54E10A.9	-	-	ENSG00000067048	ENSG00000152670,ENSG00000067048,ENSG00000215301
glh-4	T12F5.3	ENSG00000152670	-	ENSG00000152670	-
klp-17	W02B12.7	ENSG00000237649,ENSG00000167702	ENSG00000140859	-	ENSG00000204197,ENSG00000237649,ENSG00000233450,ENSG00000140859
Y18D10A.22	Y18D10A.22	ENSG00000127946,ENSG00000130787	-	-	-
hmit-1.3	M01F1.5	ENSG00000151229	ENSG00000151229	ENSG00000151229	ENSG00000136856,ENSG00000151229
his-59	F55G1.2	ENSG00000203818	-	ENSG00000203811	ENSG00000183598,ENSG00000203811,ENSG00000203852,ENSG00000132475,ENSG00000163041,ENSG00000112727,ENSG00000124693,ENSG00000178458,ENSG00000182572,ENSG00000198366,ENSG00000197153,ENSG00000196966,ENSG00000196532,ENSG00000203813,ENSG00000197409,ENSG00000203818
C50D2.8	C50D2.8	ENSG00000108848	ENSG00000108848	ENSG00000108848	ENSG00000108848
ife-5	Y57A10A.30	ENSG00000151247,ENSG00000175766	-	-	-
Y22D7AR.6	Y22D7AR.6	ENSG00000176095,ENSG00000068745,ENSG00000161896	-	-	-
his-69	E03A3.3	ENSG00000163041,ENSG00000188375,ENSG00000224213,ENSG00000231687	-	-	ENSG00000183598,ENSG00000203811,ENSG00000203852,ENSG00000132475,ENSG00000163041,ENSG00000112727,ENSG00000124693,ENSG00000178458,ENSG00000182572,ENSG00000198366,ENSG00000197153,ENSG00000196966,ENSG00000196532,ENSG00000203813,ENSG00000197409,ENSG00000203818
unc-61	Y50E8A.4	ENSG00000138758,ENSG00000164402,ENSG00000125354,ENSG00000186522,ENSG00000154997	ENSG00000164402,ENSG00000138758,ENSG00000125354,ENSG00000186522,ENSG00000154997	ENSG00000138758	ENSG00000138758,ENSG00000164402,ENSG00000125354,ENSG00000186522,ENSG00000154997
his-65	H02I12.7	ENSG00000184825,ENSG00000184348,ENSG00000182611,ENSG00000196787,ENSG00000196747,ENSG00000198374,ENSG00000233224,ENSG00000164508	-	ENSG00000263965	ENSG00000184270,ENSG00000180573,ENSG00000188486,ENSG00000164508,ENSG00000182611,ENSG00000184348,ENSG00000198374,ENSG00000196747,ENSG00000196787,ENSG00000233224,ENSG00000184825,ENSG00000184260,ENSG00000137259,ENSG00000168274,ENSG00000203812,ENSG00000183558,ENSG00000196866,ENSG00000181218
xrn-1	Y39G8C.1	ENSG00000114127	ENSG00000114127	ENSG00000114127	ENSG00000088930,ENSG00000114127
pptr-2	C13G3.3	ENSG00000112640,ENSG00000078304	ENSG00000112640,ENSG00000078304	ENSG00000112640	ENSG00000078304,ENSG00000154001,ENSG00000112640,ENSG00000068971,ENSG00000066027
erfa-1	T05H4.6	ENSG00000120705	ENSG00000120705	-	ENSG00000120705
ctns-1	C41C4.7	ENSG00000040531	ENSG00000040531	ENSG00000040531	ENSG00000040531
Y69A2AR.32	Y69A2AR.32	ENSG00000112232,ENSG00000131773,ENSG00000121774	-	-	-
vamp-8	B0513.9	ENSG00000118640	ENSG00000118640	-	ENSG00000220205,ENSG00000117533,ENSG00000118640,ENSG00000049245,ENSG00000139190
eri-7	C41D11.7	ENSG00000132740	-	-	-
F10C2.4	F10C2.4	ENSG00000062822	ENSG00000062822	ENSG00000062822	ENSG00000062822
puf-5	F54C9.8	ENSG00000134644,ENSG00000055917	-	-	-
sig-7	F39H2.2	ENSG00000131013	ENSG00000131013	ENSG00000131013	ENSG00000131013
Y48G1C.12	Y48G1C.12	ENSG00000164162	ENSG00000164162	ENSG00000164162	ENSG00000164162
pkc-3	F09E5.1	ENSG00000163558,ENSG00000067606	ENSG00000163558,ENSG00000067606	ENSG00000163558	ENSG00000163558,ENSG00000067606
cit-1.2	F44B9.3	ENSG00000082258,ENSG00000129315	ENSG00000129315,ENSG00000082258	ENSG00000129315	ENSG00000082258,ENSG00000129315
ddp-1	Y39A3CR.4	ENSG00000126953,ENSG00000150779	ENSG00000126953,ENSG00000150779	-	ENSG00000150779,ENSG00000126953
his-47	B0035.7	ENSG00000184825,ENSG00000184348,ENSG00000182611,ENSG00000196787,ENSG00000196747,ENSG00000198374,ENSG00000233224,ENSG00000164508	-	ENSG00000263965	ENSG00000184270,ENSG00000180573,ENSG00000188486,ENSG00000164508,ENSG00000182611,ENSG00000184348,ENSG00000198374,ENSG00000196747,ENSG00000196787,ENSG00000233224,ENSG00000184825,ENSG00000184260,ENSG00000137259,ENSG00000168274,ENSG00000203812,ENSG00000183558,ENSG00000196866,ENSG00000181218
D1054.3	D1054.3	ENSG00000165416	ENSG00000165416	ENSG00000165416	ENSG00000165416
C44E4.4	C44E4.4	ENSG00000138385	ENSG00000138385	ENSG00000138385	ENSG00000138385
spl-1	Y66H1B.4	ENSG00000166224	ENSG00000166224	-	ENSG00000166224
ttm-1	Y39E4A.2	ENSG00000104154	-	-	ENSG00000162695,ENSG00000158014,ENSG00000170385,ENSG00000104154,ENSG00000164756,ENSG00000196660,ENSG00000145740
ragc-1	Y24F12A.2	ENSG00000025039,ENSG00000116954	ENSG00000025039,ENSG00000116954	-	ENSG00000116954,ENSG00000025039
tre-3	W05E10.4	ENSG00000118094	-	-	ENSG00000118094
raga-1	T24F1.1	ENSG00000155876,ENSG00000083750	ENSG00000155876,ENSG00000083750	ENSG00000083750	ENSG00000155876,ENSG00000083750
pmp-2	C44B7.9	ENSG00000117528	ENSG00000117528	ENSG00000117528	ENSG00000117528,ENSG00000101986,ENSG00000173208,ENSG00000119688
gos-28	F08F8.8	ENSG00000108587	ENSG00000108587	-	ENSG00000108587
aps-1	F29G9.3	ENSG00000106367,ENSG00000152056,ENSG00000182287	ENSG00000106367,ENSG00000182287	ENSG00000182287	ENSG00000182287,ENSG00000152056,ENSG00000106367
Y43D4A.6	Y43D4A.6	ENSG00000149554	-	-	-
let-49	Y54E5B.3	ENSG00000155868	ENSG00000155868	ENSG00000087495	ENSG00000155868
fzr-1	ZK1307.6	ENSG00000105325	ENSG00000105325	ENSG00000105325	ENSG00000105325
epc-1	Y111B2A.11	ENSG00000120616,ENSG00000135999	ENSG00000120616,ENSG00000135999	ENSG00000135999	ENSG00000135999,ENSG00000120616
pde-12	R17.2	ENSG00000174840	ENSG00000174840	-	ENSG00000174840
F17C11.10	F17C11.10	ENSG00000198554	ENSG00000198554	ENSG00000198554	ENSG00000198554
his-3	T10C6.12	ENSG00000184825,ENSG00000184348,ENSG00000182611,ENSG00000196787,ENSG00000196747,ENSG00000198374,ENSG00000233224,ENSG00000164508	-	ENSG00000263965	ENSG00000184270,ENSG00000180573,ENSG00000188486,ENSG00000164508,ENSG00000182611,ENSG00000184348,ENSG00000198374,ENSG00000196747,ENSG00000196787,ENSG00000233224,ENSG00000184825,ENSG00000184260,ENSG00000137259,ENSG00000168274,ENSG00000203812,ENSG00000183558,ENSG00000196866,ENSG00000181218
Y53F4B.42	Y53F4B.42	ENSG00000087995,ENSG00000165055,ENSG00000123600	ENSG00000165055,ENSG00000087995,ENSG00000123600	ENSG00000165055	ENSG00000165055,ENSG00000087995,ENSG00000206562,ENSG00000123600
rpb-3	C36B1.3	ENSG00000102978	ENSG00000102978	ENSG00000102978	ENSG00000102978
his-27	K06C4.13	ENSG00000203818	-	ENSG00000203811	ENSG00000183598,ENSG00000203811,ENSG00000203852,ENSG00000132475,ENSG00000163041,ENSG00000112727,ENSG00000124693,ENSG00000178458,ENSG00000182572,ENSG00000198366,ENSG00000197153,ENSG00000196966,ENSG00000196532,ENSG00000203813,ENSG00000197409,ENSG00000203818
lin-23	K10B2.1	ENSG00000072803,ENSG00000166167	ENSG00000072803,ENSG00000166167	ENSG00000072803	ENSG00000072803,ENSG00000166167
tre-4	F15A2.2	ENSG00000118094	-	-	-
ptr-11	F56C11.2	ENSG00000182077,ENSG00000165186,ENSG00000178729,ENSG00000244694	-	-	-
K08F4.1	K08F4.1	ENSG00000127586	ENSG00000127586	ENSG00000127586	ENSG00000127586
cin-4	ZK1127.7	-	-	-	ENSG00000077097,ENSG00000131747
Y104H12D.3	Y104H12D.3	ENSG00000166224	-	-	-
K12C11.1	K12C11.1	ENSG00000124299	ENSG00000124299	ENSG00000124299	ENSG00000196236,ENSG00000124299
scpl-1	B0379.4	ENSG00000144677,ENSG00000144579,ENSG00000175215	ENSG00000144677,ENSG00000144579,ENSG00000175215	ENSG00000144677	ENSG00000144677,ENSG00000175215,ENSG00000144579
C47E12.3	C47E12.3	ENSG00000134109	ENSG00000134109	-	ENSG00000088298,ENSG00000134109
fbf-2	F21H12.5	ENSG00000134644,ENSG00000055917	-	-	-
C34D4.4	C34D4.4	ENSG00000171928,ENSG00000166676,ENSG00000175106	ENSG00000171928,ENSG00000175106,ENSG00000166676	-	ENSG00000171928,ENSG00000166676
fbf-1	H12I13.4	ENSG00000134644,ENSG00000055917	-	-	-
vps-32.2	C37C3.3	ENSG00000100931,ENSG00000101421,ENSG00000164695	ENSG00000101421,ENSG00000164695,ENSG00000254505	ENSG00000101421	ENSG00000101421,ENSG00000254505,ENSG00000164695
puf-8	C30G12.7	-	-	-	ENSG00000055917,ENSG00000134644
Y71G12B.27	Y71G12B.27	-	ENSG00000123975	ENSG00000123975	ENSG00000173207,ENSG00000123975,ENSG00000178556
set-16	T12D8.1	ENSG00000055609,ENSG00000167548	ENSG00000167548,ENSG00000055609	-	ENSG00000167548,ENSG00000055609
his-25	ZK131.2	ENSG00000203818	-	ENSG00000203811	ENSG00000183598,ENSG00000203811,ENSG00000203852,ENSG00000132475,ENSG00000163041,ENSG00000112727,ENSG00000124693,ENSG00000178458,ENSG00000182572,ENSG00000198366,ENSG00000197153,ENSG00000196966,ENSG00000196532,ENSG00000203813,ENSG00000197409,ENSG00000203818
rad-50	T04H1.4	ENSG00000113522	ENSG00000113522	-	ENSG00000113522
ptr-2	C32E8.8	ENSG00000182077,ENSG00000165186,ENSG00000178729,ENSG00000244694	ENSG00000165186,ENSG00000178729	-	ENSG00000182077
panl-3	ZK632.7	ENSG00000152520	ENSG00000152520	-	ENSG00000152520
dohh-1	C14A4.1	ENSG00000129932	ENSG00000129932	-	ENSG00000129932
npp-20	Y77E11A.13	ENSG00000157020	ENSG00000157020	ENSG00000157020	ENSG00000157020
pld-1	C04G6.3	ENSG00000075651,ENSG00000129219	ENSG00000075651,ENSG00000129219	ENSG00000075651	ENSG00000075651,ENSG00000129219
cye-1	C37A2.4	ENSG00000105173,ENSG00000175305	ENSG00000105173,ENSG00000175305	ENSG00000105173	ENSG00000105173
ZK430.5	ZK430.5	ENSG00000135476	-	-	-
ZK686.3	ZK686.3	ENSG00000102158,ENSG00000104723	ENSG00000104723,ENSG00000102158,ENSG00000215762	ENSG00000104723	ENSG00000104723,ENSG00000102158
nkcc-1	Y37A1C.1	ENSG00000064651,ENSG00000074803,ENSG00000070915	ENSG00000064651,ENSG00000074803,ENSG00000070915	ENSG00000064651	ENSG00000064651,ENSG00000070915,ENSG00000074803
ulp-2	Y38A8.3	ENSG00000112701,ENSG00000138468	-	-	-
tag-325	C38D4.5	ENSG00000075884,ENSG00000159314,ENSG00000165322,ENSG00000123329,ENSG00000186517,ENSG00000031081	ENSG00000165322,ENSG00000159314,ENSG00000123329	ENSG00000087495	ENSG00000159314,ENSG00000185602
tbb-2	C36E8.5	ENSG00000173876,ENSG00000173213,ENSG00000159247,ENSG00000127589,ENSG00000101162	-	ENSG00000235067	ENSG00000101162,ENSG00000127589,ENSG00000137285,ENSG00000104833,ENSG00000258947,ENSG00000173213,ENSG00000176014,ENSG00000173876,ENSG00000196230,ENSG00000188229,ENSG00000137267,ENSG00000183311,ENSG00000224156,ENSG00000229684,ENSG00000235067,ENSG00000227739,ENSG00000232575,ENSG00000232421
dpy-28	Y39A1B.3	ENSG00000010292	ENSG00000010292	ENSG00000010292	ENSG00000010292
pro-2	C07E3.2	ENSG00000188976	ENSG00000188976	ENSG00000188976	ENSG00000188976
ZC317.1	ZC317.1	ENSG00000152670	-	-	-
Y42H9AR.2	Y42H9AR.2	ENSG00000178719,ENSG00000135472,ENSG00000135926	-	ENSG00000135472	-
rcor-1	Y74C9A.4	-	ENSG00000089902,ENSG00000117625,ENSG00000167771	-	-
copb-1	Y25C1A.5	ENSG00000129083	ENSG00000129083	ENSG00000129083	ENSG00000129083
atg-4.1	Y87G2A.3	ENSG00000101844,ENSG00000168397	ENSG00000101844,ENSG00000168397	ENSG00000101844	ENSG00000168397,ENSG00000125703,ENSG00000101844,ENSG00000130734
arx-4	Y6D11A.2	ENSG00000163466	ENSG00000163466	ENSG00000163466	ENSG00000163466
vps-2	Y46G5A.12	ENSG00000130724	ENSG00000130724	-	ENSG00000130724
F37C12.1	F37C12.1	ENSG00000105248	ENSG00000105248	-	ENSG00000105248
F53F4.14	F53F4.14	ENSG00000143751	ENSG00000143751	ENSG00000143751	ENSG00000143751
usp-14	C13B4.2	ENSG00000101557	ENSG00000101557	ENSG00000101557	ENSG00000101557
tat-3	W09D10.2	ENSG00000118322,ENSG00000145246,ENSG00000206190	ENSG00000145246,ENSG00000118322,ENSG00000206190	ENSG00000145246	ENSG00000145246,ENSG00000118322,ENSG00000206190
wht-8	Y47D3A.11	-	ENSG00000118777	-	ENSG00000172350,ENSG00000160179,ENSG00000118777,ENSG00000143921
vps-15	ZK930.1	ENSG00000196455	ENSG00000196455	-	ENSG00000196455
C27H6.8	C27H6.8	ENSG00000139637	ENSG00000139637	ENSG00000139637	ENSG00000139637
Y43F4B.7	Y43F4B.7	ENSG00000123643,ENSG00000186335,ENSG00000186334,ENSG00000180773	ENSG00000123643,ENSG00000186335,ENSG00000186334,ENSG00000180773	-	ENSG00000123643,ENSG00000186335,ENSG00000180773
ptr-9	F54G8.5	ENSG00000182077,ENSG00000165186,ENSG00000178729,ENSG00000244694	-	-	-
rpb-9	Y97E10AR.5	ENSG00000105258	ENSG00000105258	ENSG00000105258	ENSG00000105258
sgk-1	W10G6.2	ENSG00000118515,ENSG00000104205,ENSG00000101049	ENSG00000118515,ENSG00000104205,ENSG00000101049	ENSG00000118515	ENSG00000108443,ENSG00000175634,ENSG00000117020,ENSG00000105221,ENSG00000142208,ENSG00000101049,ENSG00000104205,ENSG00000118515
ran-3	C26D10.1	ENSG00000180198	ENSG00000180198	SNHG3-RCC1	ENSG00000180198
pisy-1	Y46G5A.5	ENSG00000103502	ENSG00000103502	ENSG00000103502	ENSG00000103502
nmat-2	F26H9.4	ENSG00000157064	ENSG00000163864,ENSG00000173614	ENSG00000163864	ENSG00000173614,ENSG00000163864
rnp-2	K08D10.4	ENSG00000077312,ENSG00000125870	ENSG00000077312	ENSG00000077312	ENSG00000125870,ENSG00000077312
F32D8.12	F32D8.12	ENSG00000166816	ENSG00000166816	ENSG00000166816	ENSG00000166816
stc-1	F54C9.2	ENSG00000155304	ENSG00000155304	ENSG00000155304	ENSG00000155304
H27A22.1	H27A22.1	ENSG00000115828,ENSG00000011478	ENSG00000011478,ENSG00000115828	-	ENSG00000115828,ENSG00000011478
tre-1	F57B10.7	ENSG00000118094	ENSG00000118094	ENSG00000268021	ENSG00000118094
wee-1.3	Y53C12A.1	ENSG00000127564	-	-	ENSG00000127564
txl-1	Y54E10A.3	ENSG00000091164	ENSG00000091164	ENSG00000091164	ENSG00000091164
dhhc-6	M18.8	ENSG00000023041	ENSG00000023041	ENSG00000023041	ENSG00000023041
his-45	B0035.10	ENSG00000203818	-	ENSG00000203811	ENSG00000183598,ENSG00000203811,ENSG00000203852,ENSG00000132475,ENSG00000163041,ENSG00000112727,ENSG00000124693,ENSG00000178458,ENSG00000182572,ENSG00000198366,ENSG00000197153,ENSG00000196966,ENSG00000196532,ENSG00000203813,ENSG00000197409,ENSG00000203818
cdc-42	R07G3.1	ENSG00000070831	ENSG00000070831	ENSG00000087495	ENSG00000070831,ENSG00000169750,ENSG00000128340,ENSG00000136238
let-502	C10H11.9	ENSG00000134318,ENSG00000067900	ENSG00000067900,ENSG00000134318	ENSG00000134318	ENSG00000134318,ENSG00000067900
daf-16	R13H8.1	ENSG00000118689,ENSG00000150907,ENSG00000184481,ENSG00000204060	ENSG00000118689,ENSG00000150907,ENSG00000204060	-	ENSG00000118689
T08D2.2	T08D2.2	ENSG00000172269	-	-	-
fkb-8	Y18D10A.25	ENSG00000088832,ENSG00000198225,ENSG00000119782	-	-	-
rtfo-1	F25B3.6	ENSG00000137815	ENSG00000137815	ENSG00000137815	ENSG00000137815
cct-6	F01F1.8	ENSG00000146731,ENSG00000132141	ENSG00000146731,ENSG00000132141	ENSG00000146731	ENSG00000146731,ENSG00000132141
F53A2.7	F53A2.7	ENSG00000167315	ENSG00000167315	-	ENSG00000075239,ENSG00000120437,ENSG00000167315
Y55F3BR.1	Y55F3BR.1	ENSG00000079785	ENSG00000079785	ENSG00000079785	ENSG00000079785
spt-4	F54C4.2	ENSG00000213246	ENSG00000213246	ENSG00000213246	ENSG00000213246
pph-5	Y39B6A.2	ENSG00000011485	ENSG00000011485	ENSG00000011485	ENSG00000011485
lsy-13	T06A10.4	ENSG00000071243,ENSG00000111653,ENSG00000168395,ENSG00000168556,ENSG00000153487	-	-	-
lpd-3	Y47G6A.23	-	-	ENSG00000138688	ENSG00000138688
C26E6.12	C26E6.12	ENSG00000105793	ENSG00000105793	ENSG00000105793	ENSG00000101181,ENSG00000105793
acs-13	Y65B4BL.5	ENSG00000164398,ENSG00000151726,ENSG00000197142	ENSG00000151726,ENSG00000164398,ENSG00000197142	ENSG00000197142	ENSG00000151726,ENSG00000197142,ENSG00000164398,ENSG00000123983,ENSG00000068366
hipr-1	ZK370.3	ENSG00000127946,ENSG00000130787	ENSG00000127946,ENSG00000130787	ENSG00000263334	ENSG00000130787,ENSG00000127946
gpx-6	T09A12.2	ENSG00000167468	ENSG00000167468	ENSG00000116157	ENSG00000167468,ENSG00000116157,ENSG00000164294
wht-6	T26A5.1	-	ENSG00000118777	-	ENSG00000172350,ENSG00000160179,ENSG00000118777,ENSG00000143921
byn-1	F57B9.5	ENSG00000112578	ENSG00000112578	ENSG00000112578	ENSG00000112578
W09C5.7	W09C5.7	ENSG00000198825	ENSG00000198825	ENSG00000198825	ENSG00000198825
ptr-20	Y53F4B.28	ENSG00000182077,ENSG00000165186,ENSG00000178729,ENSG00000244694	-	-	-
E01A2.5	E01A2.5	ENSG00000134146	ENSG00000134146	ENSG00000134146	ENSG00000134146
W09G3.8	W09G3.8	ENSG00000134049	ENSG00000134049	-	ENSG00000134049
mbf-1	H21P03.1	ENSG00000107223	ENSG00000107223	ENSG00000107223	ENSG00000107223
F54E12.2	F54E12.2	ENSG00000116830	ENSG00000116830	-	ENSG00000116830,ENSG00000071794
fars-2	Y60A3A.13	ENSG00000145982	ENSG00000145982	-	ENSG00000145982
his-6	F45F2.13	ENSG00000203818	-	ENSG00000203811	ENSG00000183598,ENSG00000203811,ENSG00000203852,ENSG00000132475,ENSG00000163041,ENSG00000112727,ENSG00000124693,ENSG00000178458,ENSG00000182572,ENSG00000198366,ENSG00000197153,ENSG00000196966,ENSG00000196532,ENSG00000203813,ENSG00000197409,ENSG00000203818
gyg-2	T25E12.5	ENSG00000163754,ENSG00000056998,ENSG00000206159	ENSG00000163754,ENSG00000056998	-	ENSG00000163754,ENSG00000056998
vps-29	ZK1128.8	ENSG00000111237	ENSG00000111237	ENSG00000111237	ENSG00000111237
ngp-1	T19A6.2	ENSG00000134697	ENSG00000134697	ENSG00000134697	ENSG00000134697
T27A1.5	T27A1.5	ENSG00000123643,ENSG00000186335,ENSG00000186334,ENSG00000180773	ENSG00000123643,ENSG00000186335,ENSG00000186334,ENSG00000180773	-	ENSG00000123643,ENSG00000186335,ENSG00000180773
ula-1	C26E6.8	ENSG00000159593	ENSG00000159593	-	ENSG00000159593
gfat-2	F22B3.4	ENSG00000131459,ENSG00000198380	ENSG00000198380,ENSG00000131459	ENSG00000131459	ENSG00000131459,ENSG00000198380
R05D11.4	R05D11.4	ENSG00000141141	ENSG00000141141	ENSG00000141141	ENSG00000141141
F52C12.1	F52C12.1	ENSG00000042088	ENSG00000042088	ENSG00000042088	ENSG00000042088
ptr-5	C53C11.3	ENSG00000182077,ENSG00000165186,ENSG00000178729,ENSG00000244694	-	-	-
gpx-7	R03G5.5	ENSG00000167468	ENSG00000167468	ENSG00000116157	ENSG00000167468,ENSG00000116157,ENSG00000164294
T08D2.7	T08D2.7	ENSG00000183765	ENSG00000183765	ENSG00000183765	ENSG00000183765
hmit-1.2	Y51A2D.5	ENSG00000151229	ENSG00000151229	ENSG00000151229	ENSG00000136856,ENSG00000151229
his-74	W05B10.1	ENSG00000163041,ENSG00000188375,ENSG00000224213,ENSG00000231687	-	LOC440093	ENSG00000183598,ENSG00000203811,ENSG00000203852,ENSG00000132475,ENSG00000163041,ENSG00000112727,ENSG00000124693,ENSG00000178458,ENSG00000182572,ENSG00000198366,ENSG00000197153,ENSG00000196966,ENSG00000196532,ENSG00000203813,ENSG00000197409,ENSG00000203818
polh-1	F53A3.2	ENSG00000170734	ENSG00000170734	ENSG00000170734	ENSG00000170734
tag-138	F08A8.6	ENSG00000127946,ENSG00000130787	-	-	-
F36A2.2	F36A2.2	ENSG00000169718	ENSG00000169718	ENSG00000169718	ENSG00000169718
nfya-2	Y53H1A.5	ENSG00000001167	-	-	ENSG00000001167
lsm-7	ZK593.7	ENSG00000130332	ENSG00000130332	ENSG00000130332	ENSG00000130332
cdk-1	T05G5.3	ENSG00000170312	ENSG00000170312	ENSG00000170312	ENSG00000170312,ENSG00000164885,ENSG00000123374,ENSG00000108504
C27A12.6	C27A12.6	ENSG00000166233	ENSG00000166233	ENSG00000166233	ENSG00000166233
tre-5	C23H3.7	ENSG00000118094	-	-	ENSG00000118094
cdc-25.2	F16B4.8	ENSG00000164045,ENSG00000158402,ENSG00000101224	ENSG00000164045,ENSG00000158402	-	ENSG00000101224,ENSG00000164045,ENSG00000158402
brf-1	F45E12.2	ENSG00000185024	ENSG00000185024	ENSG00000185024	ENSG00000185024
chat-1	R08C7.2	ENSG00000182107,ENSG00000112697,ENSG00000235156	ENSG00000112697,ENSG00000182107	-	ENSG00000112697
gcn-2	Y81G3A.3	ENSG00000128829	ENSG00000128829	-	ENSG00000128829
F26B1.2	F26B1.2	ENSG00000165119	ENSG00000165119	ENSG00000165119	ENSG00000165119
kin-19	C03C10.1	ENSG00000113712,ENSG00000180138	ENSG00000113712,ENSG00000180138	ENSG00000113712	ENSG00000113712,ENSG00000141551,ENSG00000213923
W07E6.2	W07E6.2	ENSG00000073536	ENSG00000073536	ENSG00000073536	ENSG00000073536
top-2	K12D12.1	-	ENSG00000077097,ENSG00000131747	ENSG00000131747	ENSG00000077097,ENSG00000131747
bli-4	K04F10.4	ENSG00000140564,ENSG00000115257	-	ENSG00000099139	ENSG00000140564,ENSG00000115257,ENSG00000140479,ENSG00000160613,ENSG00000175426
F55F8.2	F55F8.2	ENSG00000089737	ENSG00000089737	ENSG00000089737	ENSG00000089737
ubh-3	Y40G12A.1	ENSG00000118939,ENSG00000154277	ENSG00000154277,ENSG00000118939	-	ENSG00000154277
itsn-1	Y116A8C.36	ENSG00000205726,ENSG00000198399	ENSG00000205726	ENSG00000205726	ENSG00000198399,ENSG00000205726
T27F6.6	T27F6.6	ENSG00000135587	ENSG00000135587	ENSG00000135587	ENSG00000135587
kin-33	DC2.7	ENSG00000149554	-	-	-
R02C2.6	R02C2.6	ENSG00000149554	-	-	ENSG00000149554
gck-2	ZC404.9	ENSG00000011566,ENSG00000168067,ENSG00000012983,ENSG00000104814	ENSG00000011566,ENSG00000012983,ENSG00000168067	ENSG00000011566	ENSG00000104814,ENSG00000011566,ENSG00000168067,ENSG00000012983
rpl-7A	Y24D9A.4	ENSG00000148303	ENSG00000148303	ENSG00000087495	ENSG00000148303
Y67H2A.7	Y67H2A.7	ENSG00000027001	ENSG00000027001	ENSG00000027001	ENSG00000027001
Y116A8C.13	Y116A8C.13	ENSG00000197275,ENSG00000182150	-	-	ENSG00000197275,ENSG00000085999
sad-1	F15A2.6	ENSG00000160469,ENSG00000174672	ENSG00000160469,ENSG00000174672	-	ENSG00000160469,ENSG00000174672,ENSG00000132356,ENSG00000162409
atl-1	T06E4.3	ENSG00000175054	-	-	ENSG00000175054
npp-11	F53F10.5	-	ENSG00000213024	-	ENSG00000110713
toc-1	ZC395.3	ENSG00000152683	ENSG00000152683	ENSG00000152683	ENSG00000152683
rps-17	T08B2.10	ENSG00000182774,ENSG00000184779,ENSG00000197575,ENSG00000060303,ENSG00000235110	ENSG00000182774,ENSG00000184779,ENSG00000060303,ENSG00000197575	ENSG00000087495	ENSG00000184779,ENSG00000182774,ENSG00000197575
M01E5.2	M01E5.2	ENSG00000101181	ENSG00000101181	ENSG00000101181	ENSG00000101181,ENSG00000105793
C28H8.4	C28H8.4	ENSG00000105438,ENSG00000136240,ENSG00000100196	ENSG00000105438,ENSG00000136240	ENSG00000105438	ENSG00000105438,ENSG00000136240
tbb-1	K01G5.7	ENSG00000173876,ENSG00000173213,ENSG00000159247,ENSG00000127589,ENSG00000101162	-	ENSG00000235067	ENSG00000101162,ENSG00000127589,ENSG00000137285,ENSG00000104833,ENSG00000258947,ENSG00000173213,ENSG00000176014,ENSG00000173876,ENSG00000196230,ENSG00000188229,ENSG00000137267,ENSG00000183311,ENSG00000224156,ENSG00000229684,ENSG00000235067,ENSG00000227739,ENSG00000232575,ENSG00000232421
smc-6	F54D5.14	ENSG00000163029	ENSG00000163029	-	ENSG00000163029
R151.7	R151.7	ENSG00000126602	ENSG00000126602	ENSG00000126602	ENSG00000126602
Y47G6A.29	Y47G6A.29	-	ENSG00000138688	-	ENSG00000138688
Y60A3A.14	Y60A3A.14	ENSG00000172269	ENSG00000172269	ENSG00000172269	ENSG00000172269
Y71H2AM.1	Y71H2AM.1	ENSG00000092094	ENSG00000092094	ENSG00000092094	ENSG00000092094,ENSG00000128694
acs-17	C46F4.2	ENSG00000068366,ENSG00000123983	ENSG00000068366,ENSG00000123983	ENSG00000068366	ENSG00000151726,ENSG00000197142,ENSG00000164398,ENSG00000123983,ENSG00000068366
ufd-1	F19B6.2	ENSG00000070010	ENSG00000070010	ENSG00000070010	ENSG00000070010
dnj-19	T05C3.5	ENSG00000069345	ENSG00000069345	ENSG00000069345	ENSG00000086061,ENSG00000069345,ENSG00000140403
M28.5	M28.5	ENSG00000100138	ENSG00000100138	ENSG00000100138	ENSG00000100138
swd-2.2	C33H5.7	ENSG00000164091	ENSG00000164091	-	ENSG00000164091
msh-5	F09E8.3	ENSG00000204410	ENSG00000204410,ENSG00000096474	ENSG00000230961	ENSG00000204410,ENSG00000233345,ENSG00000235569,ENSG00000235222,ENSG00000227314,ENSG00000230293,ENSG00000237333
R09B3.3	R09B3.3	ENSG00000101811,ENSG00000177613	ENSG00000197038,ENSG00000131003,ENSG00000102317	-	ENSG00000102317,ENSG00000099622
ruvb-1	C27H6.2	ENSG00000175792	ENSG00000175792	ENSG00000175792	ENSG00000175792
klp-15	M01E11.6	ENSG00000237649,ENSG00000167702	ENSG00000140859	-	-
met-1	C43E11.3	ENSG00000152217	ENSG00000181555	-	ENSG00000181555
Y53F4B.18	Y53F4B.18	ENSG00000165591	ENSG00000165591	ENSG00000165591	ENSG00000165591
icd-1	C56C10.8	ENSG00000145741,ENSG00000134717,ENSG00000213003,ENSG00000229226	ENSG00000134717,ENSG00000145741	ENSG00000134717	ENSG00000145741,ENSG00000134717
vha-5	F35H10.4	ENSG00000033627,ENSG00000105929,ENSG00000110719,ENSG00000185344	-	-	ENSG00000033627,ENSG00000110719,ENSG00000105929,ENSG00000185344
F43G9.3	F43G9.3	ENSG00000181035	ENSG00000181035	ENSG00000181035	ENSG00000122912,ENSG00000181035
ddb-1	M18.5	ENSG00000167986	ENSG00000167986	-	ENSG00000167986
wdr-5.3	ZC302.2	ENSG00000196363,ENSG00000196981	-	-	ENSG00000196363,ENSG00000196981
akt-1	C12D8.10	ENSG00000105221,ENSG00000117020,ENSG00000142208	ENSG00000142208,ENSG00000105221,ENSG00000117020	ENSG00000142208	ENSG00000108443,ENSG00000175634,ENSG00000117020,ENSG00000105221,ENSG00000142208,ENSG00000101049,ENSG00000104205,ENSG00000118515
F53E4.1	F53E4.1	ENSG00000124702	ENSG00000124702	ENSG00000124702	ENSG00000124702
Y73B3B.1	Y73B3B.1	ENSG00000136167,ENSG00000102024,ENSG00000120756	-	ENSG00000136167	-
Y57G11C.3	Y57G11C.3	ENSG00000130313	ENSG00000130313	-	ENSG00000130313
ptr-12	K07A3.2	ENSG00000182077,ENSG00000165186,ENSG00000178729,ENSG00000244694	-	-	-
gfat-1	F07A11.2	ENSG00000131459,ENSG00000198380	ENSG00000198380,ENSG00000131459	ENSG00000131459	ENSG00000131459,ENSG00000198380
his-17	K06C4.5	ENSG00000203818	-	ENSG00000203811	ENSG00000183598,ENSG00000203811,ENSG00000203852,ENSG00000132475,ENSG00000163041,ENSG00000112727,ENSG00000124693,ENSG00000178458,ENSG00000182572,ENSG00000198366,ENSG00000197153,ENSG00000196966,ENSG00000196532,ENSG00000203813,ENSG00000197409,ENSG00000203818
set-25	Y43F4B.3	ENSG00000152217	-	-	-
dao-5	C25A1.10	ENSG00000166197	ENSG00000166197	ENSG00000166197	ENSG00000166197
par-1	H39E23.1	ENSG00000072518,ENSG00000075413,ENSG00000007047,ENSG00000116141	ENSG00000116141,ENSG00000072518,ENSG00000075413,ENSG00000007047	ENSG00000116141	ENSG00000007047,ENSG00000075413,ENSG00000116141,ENSG00000072518
K02B12.5	K02B12.5	-	-	-	ENSG00000160949
Y37B11A.3	Y37B11A.3	ENSG00000100075	-	-	-
lin-49	F42A9.2	ENSG00000096070,ENSG00000156983,ENSG00000100425	ENSG00000156983,ENSG00000100425,ENSG00000096070	-	ENSG00000096070,ENSG00000156983,ENSG00000100425
trpp-6	K08H10.9	ENSG00000182400,ENSG00000007255	ENSG00000182400,ENSG00000007255	ENSG00000182400	ENSG00000182400
agt-1	Y62E10A.5	ENSG00000170430	-	-	ENSG00000170430
F25H9.6	F25H9.6	ENSG00000138621	ENSG00000138621	ENSG00000138621	ENSG00000138621
vps-20	Y65B4A.3	ENSG00000176108	ENSG00000176108	-	ENSG00000176108
lig-4	C07H6.1	ENSG00000174405	ENSG00000174405	-	ENSG00000174405
K07H8.9	K07H8.9	ENSG00000112232,ENSG00000131773,ENSG00000121774	-	-	-
mec-7	ZK154.3	ENSG00000137285,ENSG00000137267,ENSG00000104833,ENSG00000188229,ENSG00000196230,ENSG00000074935	-	ENSG00000137285	ENSG00000101162,ENSG00000127589,ENSG00000137285,ENSG00000104833,ENSG00000258947,ENSG00000173213,ENSG00000176014,ENSG00000173876,ENSG00000196230,ENSG00000188229,ENSG00000137267,ENSG00000183311,ENSG00000224156,ENSG00000229684,ENSG00000235067,ENSG00000227739,ENSG00000232575,ENSG00000232421
T04A8.7	T04A8.7	ENSG00000114480		ENSG00000114480	ENSG00000114480
let-754	C29E4.8	ENSG00000004455	ENSG00000004455	ENSG00000004455	ENSG00000004455
rpa-1	F18A1.5	ENSG00000132383	ENSG00000132383	-	ENSG00000132383
erd-2	F09B9.3	ENSG00000105438,ENSG00000136240,ENSG00000100196	ENSG00000105438,ENSG00000136240	ENSG00000105438	ENSG00000105438,ENSG00000136240
W08E12.7	W08E12.7	ENSG00000170515	ENSG00000170515	-	ENSG00000170515
nmt-1	T17E9.2	ENSG00000136448,ENSG00000152465	ENSG00000152465,ENSG00000136448	ENSG00000152465	ENSG00000136448,ENSG00000152465
chk-2	Y60A3A.12	ENSG00000183765	ENSG00000183765	ENSG00000183765	ENSG00000183765
dgat-2	F59A1.10	ENSG00000062282,ENSG00000166391,ENSG00000204195,ENSG00000205267,ENSG00000106384,ENSG00000184210,ENSG00000124003	-	ENSG00000124003	ENSG00000166391,ENSG00000124003,ENSG00000062282,ENSG00000184210
C01B10.9	C01B10.9	ENSG00000182156,ENSG00000112796,ENSG00000001561	ENSG00000001561,ENSG00000112796	ENSG00000001561	ENSG00000001561
vps-33.1	B0303.9	ENSG00000139719	-	-	ENSG00000139719,ENSG00000184056
taf-10	K03B4.3	ENSG00000166337	-	-	ENSG00000166337
snb-2	F23H12.1	ENSG00000168899	-	-	ENSG00000220205,ENSG00000117533,ENSG00000118640,ENSG00000049245,ENSG00000139190
mys-1	VC5.4	ENSG00000172977	ENSG00000172977	ENSG00000172977	ENSG00000103510,ENSG00000172977,ENSG00000136504
plk-2	Y71F9B.7	ENSG00000166851,ENSG00000237810	ENSG00000166851	ENSG00000166851	ENSG00000166851,ENSG00000145632,ENSG00000173846
elpc-3	ZK863.3	ENSG00000134014	ENSG00000134014	ENSG00000134014	ENSG00000134014
sucg-1	C50F7.4	ENSG00000172340	ENSG00000172340	-	ENSG00000172340,ENSG00000136143
F10C2.5	F10C2.5	ENSG00000088298	ENSG00000088298	ENSG00000088298	ENSG00000088298,ENSG00000134109
him-14	ZK1127.11	ENSG00000057468	ENSG00000057468	ENSG00000057468	ENSG00000057468
trpp-5	Y57A10A.16	ENSG00000181029	ENSG00000181029	ENSG00000181029	ENSG00000181029
T22C1.3	T22C1.3	ENSG00000101464	ENSG00000101464	ENSG00000101464	ENSG00000101464
ptr-23	ZK270.1	ENSG00000182077,ENSG00000165186,ENSG00000178729,ENSG00000244694	-	-	-
tag-335	C42C1.5	ENSG00000173540	ENSG00000173540	ENSG00000173540	ENSG00000173540
R102.4	R102.4	-	-	ENSG00000087495	-
nmat-1	W06B3.1	ENSG00000157064	ENSG00000163864,ENSG00000173614	ENSG00000163864	ENSG00000173614,ENSG00000163864
lsm-1	F40F8.9	ENSG00000175324	ENSG00000175324	ENSG00000175324	ENSG00000175324
apc-11	F35G12.9	ENSG00000141552	ENSG00000215639	-	-
pas-7	ZK945.2	ENSG00000100567	ENSG00000100567	ENSG00000100567	ENSG00000100567
tag-349	Y73F8A.34	ENSG00000166233	ENSG00000166233	ENSG00000166233	ENSG00000166233
dhhc-8	Y39E4B.7	ENSG00000099904,ENSG00000156599	ENSG00000099904,ENSG00000156599	-	ENSG00000099904,ENSG00000156599
T02G5.7	T02G5.7	ENSG00000075239	-	-	ENSG00000075239,ENSG00000120437,ENSG00000167315
cdk-9	H25P06.2	ENSG00000136807	ENSG00000136807	ENSG00000136807	ENSG00000136807
R02C2.1	R02C2.1	ENSG00000149554	-	-	-
sftd-3	C18E9.10	ENSG00000173349	ENSG00000173349	-	ENSG00000173349
ccf-1	Y56A3A.20	ENSG00000198791,ENSG00000155508	ENSG00000198791,ENSG00000155508	ENSG00000198791	ENSG00000198791,ENSG00000155508

## Sheet: tab 6 FBF and PUM2 cell cycle 
Worm Locus ID
F32D1.1
ZK287.5
ZK632.8
F22B5.7
F43C1.2
ZC168.4
ZK328.5
T19A5.2
T01G9.5
Y47D3A.26
Y43E12A.1
T04A11.6
C07H6.5
Y51H4A.3
ZK856.1
Y39H10A.7
F39B2.10
T21E12.4
W01B6.9
F18E2.3
K06A5.7
F28B3.7
F17C11.10
K10B2.1
F21H12.5
H12I13.4
C30G12.7
C37A2.4
Y39A1B.3
T05G5.3
F26B1.2
C03C10.1
T06E4.3
C07H6.1
Y56A3A.20
